# Supplementary material for: Alienness: Rapid Detection of Candidate Horizontal Gene Transfers across the Tree of Life
Source: Preprints.org preprint supplement (doi:10.20944/preprints201708.0107.v1), 2017-08-31
Supplement: Supplementary file 1 [file supplementary]

## Sheet: Feuil1
1	2	3	4	5	6	7	8	9	10	11	12	13	14	15	16	17	18
AI	query hits number	query name	best evalue Archaea	best evalue Bacteria	best evalue Eukaryota	best evalue Viroids	best evalue Viruses	best evalue Viridiplantae	best evalue Fungi	best evalue Metazoa	best hit gi	best hit prct ident	best hit org nickname	best hit org full name	best hit taxo group	best hit taxid	best hit lineage
460.52	253	Minc14716	-	0	-	-	-	-	-	-	496199884	44.9	Burkh	Burkholderia sp. H160	@Bacteria	516466	;cellular organisms;Bacteria;Proteobacteria;Betaproteobacteria;Burkholderiales;Burkholderiaceae;Burkholderia;Burkholderia sp. H160;
351.6	250	Minc18543b	-	2e-153	-	-	-	-	-	-	499310919	40.96	R_sol	Ralstonia solanacearum	@Bacteria	305	;cellular organisms;Bacteria;Proteobacteria;Betaproteobacteria;Burkholderiales;Burkholderiaceae;Ralstonia;Ralstonia solanacearum;
334.79	250	Minc06762	-	4e-146	-	-	-	-	-	-	489901163	50.65	A_glo	Arthrobacter globiformis	@Bacteria	1665	;cellular organisms;Bacteria;Terrabacteria group;Actinobacteria;Actinobacteria;Micrococcales;Micrococcaceae;Arthrobacter;Arthrobacter globiformis;
329.63	250	Minc19211	-	-	7e-144	-	-	7e-144	-	-	30580336	99.5	E_glo	Eucalyptus globulus	@Eukaryota@Viridiplantae	34317	;cellular organisms;Eukaryota;Viridiplantae;Streptophyta;Streptophytina;Embryophyta;Tracheophyta;Euphyllophyta;Spermatophyta;Magnoliophyta;Mesangiospermae;eudicotyledons;Gunneridae;Pentapetalae;rosids;malvids;Myrtales;Myrtaceae;Myrtoideae;Eucalypteae;Eucalyptus;Eucalyptus globulus;
327.07	250	Minc18543a	-	9e-143	-	-	-	-	-	-	499310919	40.88	R_sol	Ralstonia solanacearum	@Bacteria	305	;cellular organisms;Bacteria;Proteobacteria;Betaproteobacteria;Burkholderiales;Burkholderiaceae;Ralstonia;Ralstonia solanacearum;
319.37	253	Minc16425	-	2e-139	-	-	-	-	-	-	496199884	48.67	Burkh	Burkholderia sp. H160	@Bacteria	516466	;cellular organisms;Bacteria;Proteobacteria;Betaproteobacteria;Burkholderiales;Burkholderiaceae;Burkholderia;Burkholderia sp. H160;
261.11	250	Minc13297	-	4e-114	-	-	-	-	-	-	640933033	42.43	S_oli	Streptomyces olindensis	@Bacteria	358823	;cellular organisms;Bacteria;Terrabacteria group;Actinobacteria;Actinobacteria;Streptomycetales;Streptomycetaceae;Streptomyces;Streptomyces olindensis;
259.5	252	Minc11164	-	2e-113	-	-	-	-	-	-	496462571	48.31	Clost	Clostridium sp. DL-VIII	@Bacteria	641107	;cellular organisms;Bacteria;Terrabacteria group;Firmicutes;Clostridia;Clostridiales;Clostridiaceae;Clostridium;Clostridium sp. DL-VIII;
257.89	252	Minc18739	-	1e-112	-	-	-	-	-	-	496462571	48.29	Clost	Clostridium sp. DL-VIII	@Bacteria	641107	;cellular organisms;Bacteria;Terrabacteria group;Firmicutes;Clostridia;Clostridiales;Clostridiaceae;Clostridium;Clostridium sp. DL-VIII;
250.98	251	Minc18650	-	1e-109	-	-	-	-	-	-	496462571	47.79	Clost	Clostridium sp. DL-VIII	@Bacteria	641107	;cellular organisms;Bacteria;Terrabacteria group;Firmicutes;Clostridia;Clostridiales;Clostridiaceae;Clostridium;Clostridium sp. DL-VIII;
246.38	251	Minc18912	-	1e-107	-	-	-	-	-	-	496462571	46.88	Clost	Clostridium sp. DL-VIII	@Bacteria	641107	;cellular organisms;Bacteria;Terrabacteria group;Firmicutes;Clostridia;Clostridiales;Clostridiaceae;Clostridium;Clostridium sp. DL-VIII;
234.86	251	Minc18899b	-	1e-102	-	-	-	-	-	-	344168335	39.15	blood	blood disease bacterium R229	@Bacteria	741978	;cellular organisms;Bacteria;Proteobacteria;Betaproteobacteria;Burkholderiales;Burkholderiaceae;Ralstonia;unclassified Ralstonia;blood disease bacterium R229;
224.96	250	Minc00688	-	2e-98	-	-	-	-	-	-	516588227	48.42	R_leg	Rhizobium leguminosarum	@Bacteria	384	;cellular organisms;Bacteria;Proteobacteria;Alphaproteobacteria;Rhizobiales;Rhizobiaceae;Rhizobium/Agrobacterium group;Rhizobium;Rhizobium leguminosarum;
221.27	250	Minc11846	-	4e-103	-	-	-	-	-	5e-07	501062078	42.89	X_aut	Xanthobacter autotrophicus	@Bacteria	280	;cellular organisms;Bacteria;Proteobacteria;Alphaproteobacteria;Rhizobiales;Xanthobacteraceae;Xanthobacter;Xanthobacter autotrophicus;
214.65	250	Minc18215	-	6e-94	-	-	-	-	-	-	498014892	52.17	B_val	Bacillus vallismortis	@Bacteria	72361	;cellular organisms;Bacteria;Terrabacteria group;Firmicutes;Bacilli;Bacillales;Bacillaceae;Bacillus;Bacillus subtilis group;Bacillus vallismortis;
212.06	251	Minc18899a	-	8e-93	-	-	-	-	-	-	344168335	39.52	blood	blood disease bacterium R229	@Bacteria	741978	;cellular organisms;Bacteria;Proteobacteria;Betaproteobacteria;Burkholderiales;Burkholderiaceae;Ralstonia;unclassified Ralstonia;blood disease bacterium R229;
210.05	250	Minc02356	-	6e-92	-	-	-	-	-	-	503674051	47.31	T_ind	Thermodesulfatator indicus	@Bacteria	171695	;cellular organisms;Bacteria;Thermodesulfobacteria;Thermodesulfobacteria;Thermodesulfobacteriales;Thermodesulfobacteriaceae;Thermodesulfatator;Thermodesulfatator indicus;
202.63	250	Minc16723	-	1e-88	-	-	-	-	-	-	518229900	62.15	Chela	Chelatococcus	@Bacteria	28209	;cellular organisms;Bacteria;Proteobacteria;Alphaproteobacteria;Rhizobiales;Beijerinckiaceae;Chelatococcus;
201.93	250	Minc09178	-	2e-88	-	-	-	-	-	-	496462571	41.67	Clost	Clostridium sp. DL-VIII	@Bacteria	641107	;cellular organisms;Bacteria;Terrabacteria group;Firmicutes;Clostridia;Clostridiales;Clostridiaceae;Clostridium;Clostridium sp. DL-VIII;
201.53	250	Minc17844a	-	3e-88	-	-	-	-	-	-	647791591	58.08	Rhizo	Rhizobium etli bv. mimosae str. IE4771	@Bacteria	1432050	;cellular organisms;Bacteria;Proteobacteria;Alphaproteobacteria;Rhizobiales;Rhizobiaceae;Rhizobium/Agrobacterium group;Rhizobium;Rhizobium etli;Rhizobium etli bv. mimosae;Rhizobium etli bv. mimosae str. IE4771;
200.32	250	Minc03215	-	1e-87	-	-	-	-	-	-	496462571	40.9	Clost	Clostridium sp. DL-VIII	@Bacteria	641107	;cellular organisms;Bacteria;Terrabacteria group;Firmicutes;Clostridia;Clostridiales;Clostridiaceae;Clostridium;Clostridium sp. DL-VIII;
192.32	89	Minc17772	-	3e-84	-	-	-	-	-	-	522153940	71.79	A_ben	Amycolatopsis benzoatilytica	@Bacteria	346045	;cellular organisms;Bacteria;Terrabacteria group;Actinobacteria;Actinobacteria;Pseudonocardiales;Pseudonocardiaceae;Amycolatopsis;Amycolatopsis benzoatilytica;
180.11	250	Minc14982	-	6e-79	-	-	-	-	-	-	504216794	47.37	F_aur	Frateuria aurantia	@Bacteria	81475	;cellular organisms;Bacteria;Proteobacteria;Gammaproteobacteria;Xanthomonadales;Rhodanobacteraceae;Frateuria;Frateuria aurantia;
176.2	250	Minc17844b	-	3e-77	-	-	-	-	-	-	647791591	58.33	Rhizo	Rhizobium etli bv. mimosae str. IE4771	@Bacteria	1432050	;cellular organisms;Bacteria;Proteobacteria;Alphaproteobacteria;Rhizobiales;Rhizobiaceae;Rhizobium/Agrobacterium group;Rhizobium;Rhizobium etli;Rhizobium etli bv. mimosae;Rhizobium etli bv. mimosae str. IE4771;
175	250	Minc17844d	-	1e-76	-	-	-	-	-	-	647791591	59.11	Rhizo	Rhizobium etli bv. mimosae str. IE4771	@Bacteria	1432050	;cellular organisms;Bacteria;Proteobacteria;Alphaproteobacteria;Rhizobiales;Rhizobiaceae;Rhizobium/Agrobacterium group;Rhizobium;Rhizobium etli;Rhizobium etli bv. mimosae;Rhizobium etli bv. mimosae str. IE4771;
158.74	251	Minc09960	-	8e-103	-	-	-	-	-	7e-34	645515133	37.08	E_adh	Ensifer adhaerens	@Bacteria	106592	;cellular organisms;Bacteria;Proteobacteria;Alphaproteobacteria;Rhizobiales;Rhizobiaceae;Sinorhizobium/Ensifer group;Ensifer;Ensifer adhaerens;
147.37	211	Minc10892	-	1e-64	-	-	-	-	-	-	496232162	43.31	O_ind	Oceanibaculum indicum	@Bacteria	526216	;cellular organisms;Bacteria;Proteobacteria;Alphaproteobacteria;Rhodospirillales;Rhodospirillaceae;Oceanibaculum;Oceanibaculum indicum;
137.46	250	Minc09098	-	2e-60	-	-	-	-	-	-	506281622	47.2	A_mir	Actinosynnema mirum	@Bacteria	40567	;cellular organisms;Bacteria;Terrabacteria group;Actinobacteria;Actinobacteria;Pseudonocardiales;Pseudonocardiaceae;Actinosynnema;Actinosynnema mirum;
133.55	4	Minc08623	-	1e-58	-	-	-	-	-	-	500119886	31.87	A_cit	Acidovorax citrulli	@Bacteria	80869	;cellular organisms;Bacteria;Proteobacteria;Betaproteobacteria;Burkholderiales;Comamonadaceae;Acidovorax;Acidovorax citrulli;
132.16	250	Minc05972	-	4e-58	-	-	-	-	-	-	567778369	46.79	Micro	Microbispora sp. ATCC PTA-5024	@Bacteria	316330	;cellular organisms;Bacteria;Terrabacteria group;Actinobacteria;Actinobacteria;Streptosporangiales;Streptosporangiaceae;Microbispora;Microbispora sp. ATCC PTA-5024;
129.46	250	Minc15863	-	6e-57	-	-	-	-	-	-	498014892	52.56	B_val	Bacillus vallismortis	@Bacteria	72361	;cellular organisms;Bacteria;Terrabacteria group;Firmicutes;Bacilli;Bacillales;Bacillaceae;Bacillus;Bacillus subtilis group;Bacillus vallismortis;
127.34	250	Minc03618	-	-	5e-56	-	-	-	5e-56	-	630970502	44.98	Anthr	Anthracocystis flocculosa PF-1	@Eukaryota@Fungi	1277687	;cellular organisms;Eukaryota;Opisthokonta;Fungi;Dikarya;Basidiomycota;Ustilaginomycotina;Ustilaginomycetes;Ustilaginales;Ustilaginaceae;Anthracocystis;Anthracocystis flocculosa;Anthracocystis flocculosa PF-1;
125.95	250	Minc04661	-	2e-55	-	-	-	-	-	-	648391807	41.91	S_vir	Streptomyces viridosporus	@Bacteria	67581	;cellular organisms;Bacteria;Terrabacteria group;Actinobacteria;Actinobacteria;Streptomycetales;Streptomycetaceae;Streptomyces;Streptomyces viridosporus;
125.03	4	Minc02078	-	5e-55	-	-	-	-	-	-	500119886	32.24	A_cit	Acidovorax citrulli	@Bacteria	80869	;cellular organisms;Bacteria;Proteobacteria;Betaproteobacteria;Burkholderiales;Comamonadaceae;Acidovorax;Acidovorax citrulli;
122.26	4	Minc08453	-	8e-54	-	-	-	-	-	-	500119886	31.73	A_cit	Acidovorax citrulli	@Bacteria	80869	;cellular organisms;Bacteria;Proteobacteria;Betaproteobacteria;Burkholderiales;Comamonadaceae;Acidovorax;Acidovorax citrulli;
117.43	250	Minc03619	-	1e-51	-	-	-	-	-	-	648552027	43.42	Strep	Streptomyces sp. FxanaD5	@Bacteria	1157639	;cellular organisms;Bacteria;Terrabacteria group;Actinobacteria;Actinobacteria;Streptomycetales;Streptomycetaceae;Streptomyces;Streptomyces sp. FxanaD5;
102.23	3	Minc17204	-	4e-45	-	-	-	-	-	-	500119886	31.02	A_cit	Acidovorax citrulli	@Bacteria	80869	;cellular organisms;Bacteria;Proteobacteria;Betaproteobacteria;Burkholderiales;Comamonadaceae;Acidovorax;Acidovorax citrulli;
97.22	250	Minc18743	-	6e-43	-	-	-	-	-	-	519329442	37.05	S_afg	Streptomyces afghaniensis	@Bacteria	66865	;cellular organisms;Bacteria;Terrabacteria group;Actinobacteria;Actinobacteria;Streptomycetales;Streptomycetaceae;Streptomyces;Streptomyces afghaniensis;
94.22	250	Minc14448	-	6e-93	-	-	-	-	-	5e-52	640278532	64.11	Amino	Aminobacter sp. J41	@Bacteria	935261	;cellular organisms;Bacteria;Proteobacteria;Alphaproteobacteria;Rhizobiales;Phyllobacteriaceae;Aminobacter;Aminobacter sp. J41;
90.02	250	Minc08823	-	8e-40	-	-	-	-	-	-	254553094	41.05	S_the	Streptomyces thermocarboxydus	@Bacteria	59299	;cellular organisms;Bacteria;Terrabacteria group;Actinobacteria;Actinobacteria;Streptomycetales;Streptomycetaceae;Streptomyces;Streptomyces thermocarboxydus;
86.11	253	Minc07960	-	4e-38	-	-	-	-	-	-	522127792	53.1	A_bal	Amycolatopsis balhimycina	@Bacteria	208443	;cellular organisms;Bacteria;Terrabacteria group;Actinobacteria;Actinobacteria;Pseudonocardiales;Pseudonocardiaceae;Amycolatopsis;Amycolatopsis balhimycina;
74.38	250	Minc00380	-	5e-33	-	-	-	-	-	-	503535494	40.84	C_fim	Cellulomonas fimi	@Bacteria	1708	;cellular organisms;Bacteria;Terrabacteria group;Actinobacteria;Actinobacteria;Micrococcales;Cellulomonadaceae;Cellulomonas;Cellulomonas fimi;
69.77	250	Minc14254	-	5e-31	-	-	-	-	-	-	497400711	36.1	S_him	Streptomyces himastatinicus	@Bacteria	998084	;cellular organisms;Bacteria;Terrabacteria group;Actinobacteria;Actinobacteria;Streptomycetales;Streptomycetaceae;Streptomyces;Streptomyces himastatinicus;
69.08	250	Minc10639	-	4e-81	-	-	-	-	-	4e-51	490099651	45.98	S_vir	Streptomyces viridochromogenes	@Bacteria	1938	;cellular organisms;Bacteria;Terrabacteria group;Actinobacteria;Actinobacteria;Streptomycetales;Streptomycetaceae;Streptomyces;Streptomyces viridochromogenes;
66.08	250	Minc11772	-	2e-29	-	-	-	-	-	-	493425821	35.94	Strep	Streptomyces	@Bacteria	1883	;cellular organisms;Bacteria;Terrabacteria group;Actinobacteria;Actinobacteria;Streptomycetales;Streptomycetaceae;Streptomyces;
63.78	250	Minc14255	-	2e-28	-	-	-	-	-	-	497400711	41.36	S_him	Streptomyces himastatinicus	@Bacteria	998084	;cellular organisms;Bacteria;Terrabacteria group;Actinobacteria;Actinobacteria;Streptomycetales;Streptomycetaceae;Streptomyces;Streptomyces himastatinicus;
62.53	250	Minc01512	-	7e-28	-	-	-	-	-	-	594126951	32.6	Strep	Streptomyces sp. PRh5	@Bacteria	1158056	;cellular organisms;Bacteria;Terrabacteria group;Actinobacteria;Actinobacteria;Streptomycetales;Streptomycetaceae;Streptomyces;Streptomyces sp. PRh5;
61.48	251	Minc09488	-	2e-27	-	-	-	-	-	-	641397628	58.97	Kitas	Kitasatospora cheerisanensis KCTC 2395	@Bacteria	1348663	;cellular organisms;Bacteria;Terrabacteria group;Actinobacteria;Actinobacteria;Streptomycetales;Streptomycetaceae;Kitasatospora;Kitasatospora cheerisanensis;Kitasatospora cheerisanensis KCTC 2395;
61.07	250	Minc05810	-	3e-27	-	-	-	-	-	-	594126951	33.04	Strep	Streptomyces sp. PRh5	@Bacteria	1158056	;cellular organisms;Bacteria;Terrabacteria group;Actinobacteria;Actinobacteria;Streptomycetales;Streptomycetaceae;Streptomyces;Streptomyces sp. PRh5;
60.78	250	Minc01513	-	4e-27	-	-	-	-	-	-	639915510	35.32	S_exf	Streptomyces exfoliatus	@Bacteria	1905	;cellular organisms;Bacteria;Terrabacteria group;Actinobacteria;Actinobacteria;Streptomycetales;Streptomycetaceae;Streptomyces;Streptomyces exfoliatus;
59.87	250	Minc13942	-	1e-26	-	-	-	-	-	-	567778369	37.82	Micro	Microbispora sp. ATCC PTA-5024	@Bacteria	316330	;cellular organisms;Bacteria;Terrabacteria group;Actinobacteria;Actinobacteria;Streptosporangiales;Streptosporangiaceae;Microbispora;Microbispora sp. ATCC PTA-5024;
59.87	250	Minc05811	-	1e-26	-	-	-	-	-	-	503811224	31.17	Strep	Streptomyces	@Bacteria	1883	;cellular organisms;Bacteria;Terrabacteria group;Actinobacteria;Actinobacteria;Streptomycetales;Streptomycetaceae;Streptomyces;
56.87	250	Minc01517	-	2e-25	-	-	-	-	-	-	503821016	32.83	S_vio	Streptomyces violaceusniger	@Bacteria	68280	;cellular organisms;Bacteria;Terrabacteria group;Actinobacteria;Actinobacteria;Streptomycetales;Streptomycetaceae;Streptomyces;Streptomyces violaceusniger;
56.87	250	Minc01521	-	2e-25	-	-	-	-	-	-	503821016	32.83	S_vio	Streptomyces violaceusniger	@Bacteria	68280	;cellular organisms;Bacteria;Terrabacteria group;Actinobacteria;Actinobacteria;Streptomycetales;Streptomycetaceae;Streptomyces;Streptomyces violaceusniger;
55.26	250	Minc15862	-	1e-24	-	-	-	-	-	-	516121743	53.12	B_coa	Bacillus coagulans	@Bacteria	1398	;cellular organisms;Bacteria;Terrabacteria group;Firmicutes;Bacilli;Bacillales;Bacillaceae;Bacillus;Bacillus coagulans;
54.28	259	Minc19109a	-	-	8e-72	-	-	-	-	3e-48	530737985	81.16	Sapro	Saprolegnia diclina VS20	@Eukaryota	1156394	;cellular organisms;Eukaryota;Stramenopiles;Oomycetes;Saprolegniales;Saprolegniaceae;Saprolegnia;Saprolegnia diclina;Saprolegnia diclina VS20;
54.16	259	Minc16562a	-	-	9e-72	-	-	-	-	3e-48	530737985	81.16	Sapro	Saprolegnia diclina VS20	@Eukaryota	1156394	;cellular organisms;Eukaryota;Stramenopiles;Oomycetes;Saprolegniales;Saprolegniaceae;Saprolegnia;Saprolegnia diclina;Saprolegnia diclina VS20;
53.18	250	Minc12947	-	8e-24	-	-	-	-	-	-	504259562	31.46	A_mis	Actinoplanes missouriensis	@Bacteria	1866	;cellular organisms;Bacteria;Terrabacteria group;Actinobacteria;Actinobacteria;Micromonosporales;Micromonosporaceae;Actinoplanes;Actinoplanes missouriensis;
50.76	194	Minc10536	-	9e-23	-	-	-	-	-	-	493460164	33.33	B_mul	Burkholderia multivorans	@Bacteria	87883	;cellular organisms;Bacteria;Proteobacteria;Betaproteobacteria;Burkholderiales;Burkholderiaceae;Burkholderia;Burkholderia cepacia complex;Burkholderia multivorans;
50.66	52	Minc10889	-	1e-22	-	-	-	-	-	-	501062078	43.09	X_aut	Xanthobacter autotrophicus	@Bacteria	280	;cellular organisms;Bacteria;Proteobacteria;Alphaproteobacteria;Rhizobiales;Xanthobacteraceae;Xanthobacter;Xanthobacter autotrophicus;
49.96	250	Minc11928a	-	2e-22	-	-	-	-	-	-	503821016	30.91	S_vio	Streptomyces violaceusniger	@Bacteria	68280	;cellular organisms;Bacteria;Terrabacteria group;Actinobacteria;Actinobacteria;Streptomycetales;Streptomycetaceae;Streptomyces;Streptomyces violaceusniger;
49.74	81	Minc14296	-	1e-31	-	-	-	-	-	4e-10	502982364	41.56	H_den	Hyphomicrobium denitrificans	@Bacteria	53399	;cellular organisms;Bacteria;Proteobacteria;Alphaproteobacteria;Rhizobiales;Hyphomicrobiaceae;Hyphomicrobium;Hyphomicrobium denitrificans;
49.05	1783	Minc05459	-	1e-52	-	-	-	-	-	2e-31	522082885	45.7	K_lam	Kiloniella laminariae	@Bacteria	454162	;cellular organisms;Bacteria;Proteobacteria;Alphaproteobacteria;Kiloniellales;Kiloniellaceae;Kiloniella;Kiloniella laminariae;
48.71	250	Minc01522c	-	7e-22	-	-	-	-	-	-	639915510	35.29	S_exf	Streptomyces exfoliatus	@Bacteria	1905	;cellular organisms;Bacteria;Terrabacteria group;Actinobacteria;Actinobacteria;Streptomycetales;Streptomycetaceae;Streptomyces;Streptomyces exfoliatus;
48.35	250	Minc04192a	-	1e-90	-	-	-	-	-	1e-69	563452194	52.96	Mesor	Mesorhizobium sp. LSJC280B00	@Bacteria	1287336	;cellular organisms;Bacteria;Proteobacteria;Alphaproteobacteria;Rhizobiales;Phyllobacteriaceae;Mesorhizobium;Mesorhizobium sp. LSJC280B00;
47.26	250	Minc17843	-	3e-21	-	-	-	-	-	-	499400506	83.33	Brady	Bradyrhizobium	@Bacteria	374	;cellular organisms;Bacteria;Proteobacteria;Alphaproteobacteria;Rhizobiales;Bradyrhizobiaceae;Bradyrhizobium;
44.31	250	Minc09678a	-	4e-90	-	-	-	-	-	7e-71	563452194	52.57	Mesor	Mesorhizobium sp. LSJC280B00	@Bacteria	1287336	;cellular organisms;Bacteria;Proteobacteria;Alphaproteobacteria;Rhizobiales;Phyllobacteriaceae;Mesorhizobium;Mesorhizobium sp. LSJC280B00;
44.11	250	Minc09783	-	7e-20	-	-	-	-	-	-	506250854	36.42	J_den	Jonesia denitrificans	@Bacteria	43674	;cellular organisms;Bacteria;Terrabacteria group;Actinobacteria;Actinobacteria;Micrococcales;Jonesiaceae;Jonesia;Jonesia denitrificans;
43.75	59	Minc14782	-	1e-19	-	-	-	-	-	-	502982364	45.56	H_den	Hyphomicrobium denitrificans	@Bacteria	53399	;cellular organisms;Bacteria;Proteobacteria;Alphaproteobacteria;Rhizobiales;Hyphomicrobiaceae;Hyphomicrobium;Hyphomicrobium denitrificans;
42.36	210	Minc16424	-	4e-19	-	-	-	-	-	-	219566971	49.51	R_sol	Ralstonia solanacearum	@Bacteria	305	;cellular organisms;Bacteria;Proteobacteria;Betaproteobacteria;Burkholderiales;Burkholderiaceae;Ralstonia;Ralstonia solanacearum;
41.96	250	Minc12441	-	6e-19	-	-	-	-	-	-	516075197	42.45	alpha	alpha proteobacterium L41A	@Bacteria	1229204	;cellular organisms;Bacteria;Proteobacteria;Alphaproteobacteria;unclassified Alphaproteobacteria;unclassified Alphaproteobacteria (miscellaneous);alpha proteobacterium L41A;
41.55	250	Minc00290	-	9e-19	-	-	-	-	-	-	516075197	43.43	alpha	alpha proteobacterium L41A	@Bacteria	1229204	;cellular organisms;Bacteria;Proteobacteria;Alphaproteobacteria;unclassified Alphaproteobacteria;unclassified Alphaproteobacteria (miscellaneous);alpha proteobacterium L41A;
41.45	250	Minc07955	-	1e-18	-	-	-	-	-	-	641397628	33.94	Kitas	Kitasatospora cheerisanensis KCTC 2395	@Bacteria	1348663	;cellular organisms;Bacteria;Terrabacteria group;Actinobacteria;Actinobacteria;Streptomycetales;Streptomycetaceae;Kitasatospora;Kitasatospora cheerisanensis;Kitasatospora cheerisanensis KCTC 2395;
41.45	93	Minc07820	-	1e-18	-	-	-	-	-	-	593812168	35.81	Sphin	Sphingobium sp. Ant17	@Bacteria	1461752	;cellular organisms;Bacteria;Proteobacteria;Alphaproteobacteria;Sphingomonadales;Sphingomonadaceae;Sphingobium;Sphingobium sp. Ant17;
40.86	1739	Minc05458	-	9e-49	-	-	-	-	-	5e-31	522082885	44.18	K_lam	Kiloniella laminariae	@Bacteria	454162	;cellular organisms;Bacteria;Proteobacteria;Alphaproteobacteria;Kiloniellales;Kiloniellaceae;Kiloniella;Kiloniella laminariae;
39.65	165	Minc18856	-	6e-18	-	-	-	-	-	-	641397628	38.53	Kitas	Kitasatospora cheerisanensis KCTC 2395	@Bacteria	1348663	;cellular organisms;Bacteria;Terrabacteria group;Actinobacteria;Actinobacteria;Streptomycetales;Streptomycetaceae;Kitasatospora;Kitasatospora cheerisanensis;Kitasatospora cheerisanensis KCTC 2395;
39.14	250	Minc12674	-	3e-91	-	-	-	-	-	3e-74	503316845	51.2	C_alg	Cellulophaga algicola	@Bacteria	59600	;cellular organisms;Bacteria;FCB group;Bacteroidetes/Chlorobi group;Bacteroidetes;Flavobacteriia;Flavobacteriales;Flavobacteriaceae;Cellulophaga;Cellulophaga algicola;
39.14	250	Minc16042	-	1e-17	-	-	-	-	-	-	506250854	34.81	J_den	Jonesia denitrificans	@Bacteria	43674	;cellular organisms;Bacteria;Terrabacteria group;Actinobacteria;Actinobacteria;Micrococcales;Jonesiaceae;Jonesia;Jonesia denitrificans;
38.45	250	Minc00591	-	2e-17	-	-	-	-	-	-	494504430	35.59	delta	delta proteobacterium MLMS-1	@Bacteria	262489	;cellular organisms;Bacteria;Proteobacteria;delta/epsilon subdivisions;Deltaproteobacteria;unclassified Deltaproteobacteria;unclassified Deltaproteobacteria (miscellaneous);delta proteobacterium MLMS-1;
36.15	796	Minc19206	-	-	4e-33	-	-	-	-	2e-17	123501635	49.9	Trich	Trichomonas vaginalis G3	@Eukaryota	412133	;cellular organisms;Eukaryota;Parabasalia;Trichomonadida;Trichomonadidae;Trichomonas;Trichomonas vaginalis;Trichomonas vaginalis G3;
35.74	250	Minc18152	-	-	3e-16	-	-	-	3e-16	-	588254784	32.14	Walle	Wallemia mellicola CBS 633.66	@Eukaryota@Fungi	671144	;cellular organisms;Eukaryota;Opisthokonta;Fungi;Dikarya;Basidiomycota;Agaricomycotina;Wallemiomycetes;Wallemiales;Wallemiales incertae sedis;Wallemia;Wallemia mellicola;Wallemia mellicola CBS 633.66;
35.59	250	Minc08077	-	7e-129	-	-	-	-	-	2e-113	496149903	44.25	M_met	Mesorhizobium metallidurans	@Bacteria	489722	;cellular organisms;Bacteria;Proteobacteria;Alphaproteobacteria;Rhizobiales;Phyllobacteriaceae;Mesorhizobium;Mesorhizobium metallidurans;
35.23	250	Minc01515	-	5e-16	-	-	-	-	-	-	504846324	29.47	S_ven	Streptomyces venezuelae	@Bacteria	54571	;cellular organisms;Bacteria;Terrabacteria group;Actinobacteria;Actinobacteria;Streptomycetales;Streptomycetaceae;Streptomyces;Streptomyces venezuelae;
35.05	252	Minc10988	-	6e-16	-	-	-	-	-	-	488699754	40.2	C_fus	Cystobacter fuscus	@Bacteria	43	;cellular organisms;Bacteria;Proteobacteria;delta/epsilon subdivisions;Deltaproteobacteria;Myxococcales;Cystobacterineae;Archangiaceae;Cystobacter;Cystobacter fuscus;
34.54	250	Minc00169a	-	2e-83	-	-	-	-	-	2e-68	503316845	46.25	C_alg	Cellulophaga algicola	@Bacteria	59600	;cellular organisms;Bacteria;FCB group;Bacteroidetes/Chlorobi group;Bacteroidetes;Flavobacteriia;Flavobacteriales;Flavobacteriaceae;Cellulophaga;Cellulophaga algicola;
33.85	258	Minc06289	-	2e-15	-	-	-	-	-	-	496689361	28.52	S_ipo	Streptomyces ipomoeae	@Bacteria	103232	;cellular organisms;Bacteria;Terrabacteria group;Actinobacteria;Actinobacteria;Streptomycetales;Streptomycetaceae;Streptomyces;Streptomyces ipomoeae;
33.85	251	Minc00378	-	2e-15	-	-	-	-	-	-	503821016	37.41	S_vio	Streptomyces violaceusniger	@Bacteria	68280	;cellular organisms;Bacteria;Terrabacteria group;Actinobacteria;Actinobacteria;Streptomycetales;Streptomycetaceae;Streptomyces;Streptomyces violaceusniger;
33.44	172	Minc10989	-	3e-15	-	-	-	-	-	-	490078177	38.32	Strep	Streptomyces	@Bacteria	1883	;cellular organisms;Bacteria;Terrabacteria group;Actinobacteria;Actinobacteria;Streptomycetales;Streptomycetaceae;Streptomyces;
33.15	250	Minc03287	-	8e-84	-	-	-	-	-	2e-69	503316845	47.04	C_alg	Cellulophaga algicola	@Bacteria	59600	;cellular organisms;Bacteria;FCB group;Bacteroidetes/Chlorobi group;Bacteroidetes;Flavobacteriia;Flavobacteriales;Flavobacteriaceae;Cellulophaga;Cellulophaga algicola;
33.03	250	Minc00169b	-	9e-81	-	-	-	-	-	2e-66	503316845	45.37	C_alg	Cellulophaga algicola	@Bacteria	59600	;cellular organisms;Bacteria;FCB group;Bacteroidetes/Chlorobi group;Bacteroidetes;Flavobacteriia;Flavobacteriales;Flavobacteriaceae;Cellulophaga;Cellulophaga algicola;
32.93	250	Minc07924	-	-	1e-28	-	-	-	1e-28	2e-14	154320588	94.83	Botry	Botrytis cinerea B05.10	@Eukaryota@Fungi	332648	;cellular organisms;Eukaryota;Opisthokonta;Fungi;Dikarya;Ascomycota;saccharomyceta;Pezizomycotina;leotiomyceta;sordariomyceta;Leotiomycetes;Helotiales;Sclerotiniaceae;Botrytis;Botrytis cinerea;Botrytis cinerea B05.10;
32.34	250	Minc09039	-	9e-15	-	-	-	-	-	-	625883071	39.05	Mycob	Mycobacterium tuberculosis KT-0056	@Bacteria	1400907	;cellular organisms;Bacteria;Terrabacteria group;Actinobacteria;Actinobacteria;Corynebacteriales;Mycobacteriaceae;Mycobacterium;Mycobacterium tuberculosis complex;Mycobacterium tuberculosis;Mycobacterium tuberculosis KT-0056;
31.54	250	Minc01514	-	2e-14	-	-	-	-	-	-	504259562	27.56	A_mis	Actinoplanes missouriensis	@Bacteria	1866	;cellular organisms;Bacteria;Terrabacteria group;Actinobacteria;Actinobacteria;Micromonosporales;Micromonosporaceae;Actinoplanes;Actinoplanes missouriensis;
31.54	23	Minc02810	-	-	2e-14	-	-	-	-	-	156081949	45.45	Plasm	Plasmodium vivax Sal-1	@Eukaryota	126793	;cellular organisms;Eukaryota;Alveolata;Apicomplexa;Aconoidasida;Haemosporida;Plasmodiidae;Plasmodium;Plasmodium (Plasmodium);Plasmodium vivax;Plasmodium vivax Sal-1;
30.44	250	Minc14047a	-	3e-83	-	-	-	-	-	5e-70	503316845	45.93	C_alg	Cellulophaga algicola	@Bacteria	59600	;cellular organisms;Bacteria;FCB group;Bacteroidetes/Chlorobi group;Bacteroidetes;Flavobacteriia;Flavobacteriales;Flavobacteriaceae;Cellulophaga;Cellulophaga algicola;
30.05	250	Minc14047b	-	8e-81	-	-	-	-	-	9e-68	503316845	45.19	C_alg	Cellulophaga algicola	@Bacteria	59600	;cellular organisms;Bacteria;FCB group;Bacteroidetes/Chlorobi group;Bacteroidetes;Flavobacteriia;Flavobacteriales;Flavobacteriaceae;Cellulophaga;Cellulophaga algicola;
29.93	250	Minc01810	-	1e-13	-	-	-	-	-	-	502881570	37.21	C_fla	Cellulomonas flavigena	@Bacteria	1711	;cellular organisms;Bacteria;Terrabacteria group;Actinobacteria;Actinobacteria;Micrococcales;Cellulomonadaceae;Cellulomonas;Cellulomonas flavigena;
29.93	262	Minc00168	-	4e-80	-	-	-	-	-	4e-67	503316845	46.71	C_alg	Cellulophaga algicola	@Bacteria	59600	;cellular organisms;Bacteria;FCB group;Bacteroidetes/Chlorobi group;Bacteroidetes;Flavobacteriia;Flavobacteriales;Flavobacteriaceae;Cellulophaga;Cellulophaga algicola;
29.24	355	Minc05190a	-	2e-13	-	-	-	-	-	-	493069359	56.94	P_ste	Pantoea stewartii	@Bacteria	66269	;cellular organisms;Bacteria;Proteobacteria;Gammaproteobacteria;Enterobacterales;Erwiniaceae;Pantoea;Pantoea stewartii;
29.02	250	Minc05403	-	1e-34	-	-	-	-	-	4e-22	490099651	45.83	S_vir	Streptomyces viridochromogenes	@Bacteria	1938	;cellular organisms;Bacteria;Terrabacteria group;Actinobacteria;Actinobacteria;Streptomycetales;Streptomycetaceae;Streptomyces;Streptomyces viridochromogenes;
28.83	9	Minc01251	-	-	3e-13	-	-	-	-	-	401408671	27.54	Neosp	Neospora caninum Liverpool	@Eukaryota	572307	;cellular organisms;Eukaryota;Alveolata;Apicomplexa;Conoidasida;Coccidia;Eucoccidiorida;Eimeriorina;Sarcocystidae;Neospora;Neospora caninum;Neospora caninum Liverpool;
28.32	44	Minc05696	-	1e-21	-	-	-	-	-	2e-09	499385491	23.74	S_one	Shewanella oneidensis	@Bacteria	70863	;cellular organisms;Bacteria;Proteobacteria;Gammaproteobacteria;Alteromonadales;Shewanellaceae;Shewanella;Shewanella oneidensis;
28.04	250	Minc09037	-	2e-66	-	-	-	-	-	3e-54	495399878	56.67	Phyll	Phyllobacterium sp. YR531	@Bacteria	1144343	;cellular organisms;Bacteria;Proteobacteria;Alphaproteobacteria;Rhizobiales;Phyllobacteriaceae;Phyllobacterium;Phyllobacterium sp. YR531;
27.85	250	Minc04192b	-	4e-19	-	-	-	-	-	5e-07	518701377	51.52	Mesor	Mesorhizobium	@Bacteria	68287	;cellular organisms;Bacteria;Proteobacteria;Alphaproteobacteria;Rhizobiales;Phyllobacteriaceae;Mesorhizobium;
26.53	148	Minc11468	-	3e-12	-	-	-	-	-	-	490078177	41.28	Strep	Streptomyces	@Bacteria	1883	;cellular organisms;Bacteria;Terrabacteria group;Actinobacteria;Actinobacteria;Streptomycetales;Streptomycetaceae;Streptomyces;
26.24	267	Minc03286	-	4e-80	-	-	-	-	-	1e-68	503316845	46.71	C_alg	Cellulophaga algicola	@Bacteria	59600	;cellular organisms;Bacteria;FCB group;Bacteroidetes/Chlorobi group;Bacteroidetes;Flavobacteriia;Flavobacteriales;Flavobacteriaceae;Cellulophaga;Cellulophaga algicola;
26.24	250	Minc09678b	-	2e-17	-	-	-	-	-	5e-06	518701377	48.48	Mesor	Mesorhizobium	@Bacteria	68287	;cellular organisms;Bacteria;Proteobacteria;Alphaproteobacteria;Rhizobiales;Phyllobacteriaceae;Mesorhizobium;
25.8	110	Minc16072	-	-	5e-29	-	-	-	5e-29	8e-18	425768786	57.21	Penic	Penicillium digitatum PHI26	@Eukaryota@Fungi	1170229	;cellular organisms;Eukaryota;Opisthokonta;Fungi;Dikarya;Ascomycota;saccharomyceta;Pezizomycotina;leotiomyceta;Eurotiomycetes;Eurotiomycetidae;Eurotiales;Aspergillaceae;Penicillium;Penicillium digitatum;Penicillium digitatum PHI26;
25.33	169	Minc10987	-	1e-11	-	-	-	-	-	-	490060390	38.18	S_cla	Streptomyces clavuligerus	@Bacteria	1901	;cellular organisms;Bacteria;Terrabacteria group;Actinobacteria;Actinobacteria;Streptomycetales;Streptomycetaceae;Streptomyces;Streptomyces clavuligerus;
24.97	264	Minc14048	-	1e-79	-	-	-	-	-	7e-69	503316845	46.82	C_alg	Cellulophaga algicola	@Bacteria	59600	;cellular organisms;Bacteria;FCB group;Bacteroidetes/Chlorobi group;Bacteroidetes;Flavobacteriia;Flavobacteriales;Flavobacteriaceae;Cellulophaga;Cellulophaga algicola;
24.64	250	Minc09513	-	1e-58	-	-	-	-	-	5e-48	495856886	77.59	spott	spotted fever group	@Bacteria	114277	;cellular organisms;Bacteria;Proteobacteria;Alphaproteobacteria;Rickettsiales;Rickettsiaceae;Rickettsieae;Rickettsia;spotted fever group;
24.41	132	Minc13314	-	5e-26	-	-	-	-	-	2e-15	406908276	30.29	u_bac	uncultured bacterium	@Bacteria	77133	;cellular organisms;Bacteria;environmental samples;uncultured bacterium;
23.72	10	Minc04479	-	-	-	-	5e-11	-	-	-	167851793	23.35	Botry	Botryotinia fuckeliana partitivirus 1	@Viruses	425010	;Viruses;dsRNA viruses;Partitiviridae;unclassified Partitiviridae;Botryotinia fuckeliana partitivirus 1;
23.54	184	Minc14599	-	6e-11	-	-	-	-	-	-	490078177	37.19	Strep	Streptomyces	@Bacteria	1883	;cellular organisms;Bacteria;Terrabacteria group;Actinobacteria;Actinobacteria;Streptomycetales;Streptomycetaceae;Streptomyces;
23.31	250	Minc11982	-	-	3e-65	-	-	-	3e-65	4e-55	170107161	33.54	Lacca	Laccaria bicolor S238N-H82	@Eukaryota@Fungi	486041	;cellular organisms;Eukaryota;Opisthokonta;Fungi;Dikarya;Basidiomycota;Agaricomycotina;Agaricomycetes;Agaricomycetidae;Agaricales;Tricholomataceae;Laccaria;Laccaria bicolor;Laccaria bicolor S238N-H82;
23.13	15	Minc06783	-	-	-	-	9e-11	-	-	-	157953109	37.4	Param	Paramecium bursaria Chlorella virus NY2A	@Viruses	46021	;Viruses;dsDNA viruses, no RNA stage;Phycodnaviridae;Chlorovirus;Paramecium bursaria Chlorella virus NY2A;
22.77	250	Minc17762	-	9e-19	-	-	-	-	-	7e-09	504681643	53.57	Wolba	Wolbachia	@Bacteria	953	;cellular organisms;Bacteria;Proteobacteria;Alphaproteobacteria;Rickettsiales;Anaplasmataceae;Wolbachieae;Wolbachia;
22.52	59	Minc12770	-	-	1e-21	-	-	-	1e-21	6e-12	531866960	29.05	Ophio	Ophiocordyceps sinensis CO18	@Eukaryota@Fungi	911162	;cellular organisms;Eukaryota;Opisthokonta;Fungi;Dikarya;Ascomycota;saccharomyceta;Pezizomycotina;leotiomyceta;sordariomyceta;Sordariomycetes;Hypocreomycetidae;Hypocreales;Ophiocordycipitaceae;Ophiocordyceps;Ophiocordyceps sinensis;Ophiocordyceps sinensis CO18;
22.33	251	Minc09298a	-	4e-97	-	-	-	-	-	2e-87	646938477	51.83	C_bal	Cellulophaga baltica	@Bacteria	76594	;cellular organisms;Bacteria;FCB group;Bacteroidetes/Chlorobi group;Bacteroidetes;Flavobacteriia;Flavobacteriales;Flavobacteriaceae;Cellulophaga;Cellulophaga baltica;
22.33	250	Minc09298b	-	4e-98	-	-	-	-	-	2e-88	646938477	51.67	C_bal	Cellulophaga baltica	@Bacteria	76594	;cellular organisms;Bacteria;FCB group;Bacteroidetes/Chlorobi group;Bacteroidetes;Flavobacteriia;Flavobacteriales;Flavobacteriaceae;Cellulophaga;Cellulophaga baltica;
22.33	251	Minc09298c	-	4e-97	-	-	-	-	-	2e-87	646938477	51.67	C_bal	Cellulophaga baltica	@Bacteria	76594	;cellular organisms;Bacteria;FCB group;Bacteroidetes/Chlorobi group;Bacteroidetes;Flavobacteriia;Flavobacteriales;Flavobacteriaceae;Cellulophaga;Cellulophaga baltica;
22.33	251	Minc09446a	-	4e-97	-	-	-	-	-	2e-87	646938477	52	C_bal	Cellulophaga baltica	@Bacteria	76594	;cellular organisms;Bacteria;FCB group;Bacteroidetes/Chlorobi group;Bacteroidetes;Flavobacteriia;Flavobacteriales;Flavobacteriaceae;Cellulophaga;Cellulophaga baltica;
22.33	252	Minc09446b	-	4e-97	-	-	-	-	-	2e-87	646938477	52	C_bal	Cellulophaga baltica	@Bacteria	76594	;cellular organisms;Bacteria;FCB group;Bacteroidetes/Chlorobi group;Bacteroidetes;Flavobacteriia;Flavobacteriales;Flavobacteriaceae;Cellulophaga;Cellulophaga baltica;
22.33	250	Minc05051	-	-	2e-45	-	-	2e-45	-	1e-35	643717756	41.13	J_cur	Jatropha curcas	@Eukaryota@Viridiplantae	180498	;cellular organisms;Eukaryota;Viridiplantae;Streptophyta;Streptophytina;Embryophyta;Tracheophyta;Euphyllophyta;Spermatophyta;Magnoliophyta;Mesangiospermae;eudicotyledons;Gunneridae;Pentapetalae;rosids;fabids;Malpighiales;Euphorbiaceae;Crotonoideae;Jatropheae;Jatropha;Jatropha curcas;
22.33	3	Minc04156	-	-	2e-10	-	-	-	-	-	641583428	36.67	P_rei	Plasmodium reichenowi	@Eukaryota	5854	;cellular organisms;Eukaryota;Alveolata;Apicomplexa;Aconoidasida;Haemosporida;Plasmodiidae;Plasmodium;Plasmodium (Laverania);Plasmodium reichenowi;
22.33	5	Minc01278	-	2e-10	-	-	-	-	-	-	517111473	40.68	F_hon	Fangia hongkongensis	@Bacteria	270495	;cellular organisms;Bacteria;Proteobacteria;Gammaproteobacteria;Thiotrichales;unclassified Thiotrichales;Fangia;Fangia hongkongensis;
22.11	250	Minc09447b	-	5e-98	-	-	-	-	-	2e-88	646938477	52	C_bal	Cellulophaga baltica	@Bacteria	76594	;cellular organisms;Bacteria;FCB group;Bacteroidetes/Chlorobi group;Bacteroidetes;Flavobacteriia;Flavobacteriales;Flavobacteriaceae;Cellulophaga;Cellulophaga baltica;
21.93	21	Minc04333	-	3e-10	-	-	-	-	-	-	490683475	47.83	B_pse	Burkholderia pseudomallei	@Bacteria	28450	;cellular organisms;Bacteria;Proteobacteria;Betaproteobacteria;Burkholderiales;Burkholderiaceae;Burkholderia;pseudomallei group;Burkholderia pseudomallei;
21.23	26	Minc07774	-	6e-10	-	-	-	-	-	-	504681643	45.9	Wolba	Wolbachia	@Bacteria	953	;cellular organisms;Bacteria;Proteobacteria;Alphaproteobacteria;Rickettsiales;Anaplasmataceae;Wolbachieae;Wolbachia;
21.13	250	Minc19109b	-	-	2e-42	-	-	-	-	3e-33	530737985	77.32	Sapro	Saprolegnia diclina VS20	@Eukaryota	1156394	;cellular organisms;Eukaryota;Stramenopiles;Oomycetes;Saprolegniales;Saprolegniaceae;Saprolegnia;Saprolegnia diclina;Saprolegnia diclina VS20;
21.08	48	Minc09268	-	7e-10	-	-	-	-	-	-	295047714	39.6	Strep	Streptomyces sp. SANK 60405	@Bacteria	689687	;cellular organisms;Bacteria;Terrabacteria group;Actinobacteria;Actinobacteria;Streptomycetales;Streptomycetaceae;Streptomyces;Streptomyces sp. SANK 60405;
20.72	102	Minc18317	-	3e-30	-	-	-	-	-	3e-21	497851898	25.21	Epulo	Epulopiscium sp. 'N.t. morphotype B'	@Bacteria	420336	;cellular organisms;Bacteria;Terrabacteria group;Firmicutes;Clostridia;Clostridiales;unclassified Clostridiales;Epulopiscium;Epulopiscium sp. 'N.t. morphotype B';
20.72	160	Minc03214	-	1e-09	-	-	-	-	-	-	490078177	38.46	Strep	Streptomyces	@Bacteria	1883	;cellular organisms;Bacteria;Terrabacteria group;Actinobacteria;Actinobacteria;Streptomycetales;Streptomycetaceae;Streptomyces;
20.72	250	Minc16562b	-	-	3e-42	-	-	-	-	3e-33	530737985	77.32	Sapro	Saprolegnia diclina VS20	@Eukaryota	1156394	;cellular organisms;Eukaryota;Stramenopiles;Oomycetes;Saprolegniales;Saprolegniaceae;Saprolegnia;Saprolegnia diclina;Saprolegnia diclina VS20;
20.03	251	Minc02581	-	-	2e-09	-	-	2e-09	-	-	347817472	35.23	C_sat	Cucumis sativus	@Eukaryota@Viridiplantae	3659	;cellular organisms;Eukaryota;Viridiplantae;Streptophyta;Streptophytina;Embryophyta;Tracheophyta;Euphyllophyta;Spermatophyta;Magnoliophyta;Mesangiospermae;eudicotyledons;Gunneridae;Pentapetalae;rosids;fabids;Cucurbitales;Cucurbitaceae;Benincaseae;Cucumis;Cucumis sativus;
20.03	250	Minc13502	-	6e-72	-	-	-	-	-	3e-63	503760955	44.44	Z_gal	Zobellia galactanivorans	@Bacteria	63186	;cellular organisms;Bacteria;FCB group;Bacteroidetes/Chlorobi group;Bacteroidetes;Flavobacteriia;Flavobacteriales;Flavobacteriaceae;Zobellia;Zobellia galactanivorans;
19.62	217	Minc14116	-	3e-09	-	-	-	-	-	-	641397628	35.58	Kitas	Kitasatospora cheerisanensis KCTC 2395	@Bacteria	1348663	;cellular organisms;Bacteria;Terrabacteria group;Actinobacteria;Actinobacteria;Streptomycetales;Streptomycetaceae;Kitasatospora;Kitasatospora cheerisanensis;Kitasatospora cheerisanensis KCTC 2395;
19.62	9	Minc01501	-	-	-	-	3e-09	-	-	-	510792797	40.19	Vibri	Vibrio phage jenny 12G5	@Viruses	573176	;Viruses;dsDNA viruses, no RNA stage;Caudovirales;Siphoviridae;unclassified Siphoviridae;Vibrio phage jenny 12G5;
19.62	1	Minc07899	-	-	3e-09	-	-	-	-	-	471220453	29.66	I_mul	Ichthyophthirius multifiliis	@Eukaryota	5932	;cellular organisms;Eukaryota;Alveolata;Ciliophora;Intramacronucleata;Oligohymenophorea;Hymenostomatida;Ophryoglenina;Ichthyophthirius;Ichthyophthirius multifiliis;
19.62	8	Minc03761	-	-	3e-09	-	-	-	-	-	586733830	30.41	Tetra	Tetrahymena thermophila SB210	@Eukaryota	312017	;cellular organisms;Eukaryota;Alveolata;Ciliophora;Intramacronucleata;Oligohymenophorea;Hymenostomatida;Tetrahymenina;Tetrahymenidae;Tetrahymena;Tetrahymena thermophila;Tetrahymena thermophila SB210;
19.11	7	Minc14028	-	-	4e-12	-	-	-	-	0.0008	145497979	18.41	Param	Paramecium tetraurelia strain d4-2	@Eukaryota	412030	;cellular organisms;Eukaryota;Alveolata;Ciliophora;Intramacronucleata;Oligohymenophorea;Peniculida;Parameciidae;Paramecium;Paramecium tetraurelia;Paramecium tetraurelia strain d4-2;
19.11	26	Minc17268	-	5e-09	-	-	-	-	-	-	504259562	32.97	A_mis	Actinoplanes missouriensis	@Bacteria	1866	;cellular organisms;Bacteria;Terrabacteria group;Actinobacteria;Actinobacteria;Micromonosporales;Micromonosporaceae;Actinoplanes;Actinoplanes missouriensis;
19.01	250	Minc17410	-	5e-53	-	-	-	-	-	9e-45	495398830	61.22	Phyll	Phyllobacterium sp. YR531	@Bacteria	1144343	;cellular organisms;Bacteria;Proteobacteria;Alphaproteobacteria;Rhizobiales;Phyllobacteriaceae;Phyllobacterium;Phyllobacterium sp. YR531;
18.93	384	Minc07198	-	-	6e-18	-	-	-	6e-18	1e-09	629683397	29.36	Metar	Metarhizium acridum CQMa 102	@Eukaryota@Fungi	655827	;cellular organisms;Eukaryota;Opisthokonta;Fungi;Dikarya;Ascomycota;saccharomyceta;Pezizomycotina;leotiomyceta;sordariomyceta;Sordariomycetes;Hypocreomycetidae;Hypocreales;Clavicipitaceae;Metarhizium;Metarhizium acridum;Metarhizium acridum CQMa 102;
18.78	5	Minc08558	-	-	7e-09	-	-	7e-09	-	-	19032422	29.11	C_ser	Cornus sericea	@Eukaryota@Viridiplantae	179117	;cellular organisms;Eukaryota;Viridiplantae;Streptophyta;Streptophytina;Embryophyta;Tracheophyta;Euphyllophyta;Spermatophyta;Magnoliophyta;Mesangiospermae;eudicotyledons;Gunneridae;Pentapetalae;asterids;Cornales;Cornaceae;Cornus;Cornus sericea;
17.32	42	Minc01052	-	3e-08	-	-	-	-	-	-	589807806	27.84	Burkh	Burkholderia pseudomallei MSHR6137	@Bacteria	1408264	;cellular organisms;Bacteria;Proteobacteria;Betaproteobacteria;Burkholderiales;Burkholderiaceae;Burkholderia;pseudomallei group;Burkholderia pseudomallei;Burkholderia pseudomallei MSHR6137;
16.97	250	Minc13221b	-	3e-96	-	-	-	-	-	7e-89	586954898	53.31	Hymen	Hymenobacter swuensis DY53	@Bacteria	1227739	;cellular organisms;Bacteria;FCB group;Bacteroidetes/Chlorobi group;Bacteroidetes;Cytophagia;Cytophagales;Hymenobacteraceae;Hymenobacter;Hymenobacter swuensis;Hymenobacter swuensis DY53;
16.81	251	Minc13221a	-	3e-95	-	-	-	-	-	6e-88	586954898	53.31	Hymen	Hymenobacter swuensis DY53	@Bacteria	1227739	;cellular organisms;Bacteria;FCB group;Bacteroidetes/Chlorobi group;Bacteroidetes;Cytophagia;Cytophagales;Hymenobacteraceae;Hymenobacter;Hymenobacter swuensis;Hymenobacter swuensis DY53;
16.81	2	Minc13330	-	5e-08	-	-	-	-	-	-	566236441	39.47	Veill	Veillonella dispar DORA_11	@Bacteria	1403949	;cellular organisms;Bacteria;Terrabacteria group;Firmicutes;Negativicutes;Veillonellales;Veillonellaceae;Veillonella;Veillonella dispar;Veillonella dispar DORA_11;
16.81	250	Minc01516	-	-	5e-08	-	-	-	5e-08	-	389628100	32.86	Magna	Magnaporthe oryzae 70-15	@Eukaryota@Fungi	242507	;cellular organisms;Eukaryota;Opisthokonta;Fungi;Dikarya;Ascomycota;saccharomyceta;Pezizomycotina;leotiomyceta;sordariomyceta;Sordariomycetes;Sordariomycetidae;Magnaporthales;Magnaporthaceae;Magnaporthe;Magnaporthe oryzae;Magnaporthe oryzae 70-15;
16.63	2	Minc13329	-	6e-08	-	-	-	-	-	-	566236441	37.17	Veill	Veillonella dispar DORA_11	@Bacteria	1403949	;cellular organisms;Bacteria;Terrabacteria group;Firmicutes;Negativicutes;Veillonellales;Veillonellaceae;Veillonella;Veillonella dispar;Veillonella dispar DORA_11;
16.52	250	Minc05420	-	-	6e-14	-	-	-	6e-14	9e-07	154321766	91.67	Botry	Botrytis cinerea B05.10	@Eukaryota@Fungi	332648	;cellular organisms;Eukaryota;Opisthokonta;Fungi;Dikarya;Ascomycota;saccharomyceta;Pezizomycotina;leotiomyceta;sordariomyceta;Leotiomycetes;Helotiales;Sclerotiniaceae;Botrytis;Botrytis cinerea;Botrytis cinerea B05.10;
16.52	250	Minc12158	-	2e-50	-	-	-	-	-	3e-43	495398830	58.02	Phyll	Phyllobacterium sp. YR531	@Bacteria	1144343	;cellular organisms;Bacteria;Proteobacteria;Alphaproteobacteria;Rhizobiales;Phyllobacteriaceae;Phyllobacterium;Phyllobacterium sp. YR531;
16.52	250	Minc14603	-	2e-65	-	-	-	-	-	3e-58	488433835	46.69	S_epi	Staphylococcus epidermidis	@Bacteria	1282	;cellular organisms;Bacteria;Terrabacteria group;Firmicutes;Bacilli;Bacillales;Staphylococcaceae;Staphylococcus;Staphylococcus epidermidis;
16.12	1	Minc16860	-	-	1e-07	-	-	-	1e-07	-	575487906	29.94	Batra	Batrachochytrium dendrobatidis JAM81	@Eukaryota@Fungi	684364	;cellular organisms;Eukaryota;Opisthokonta;Fungi;Chytridiomycota;Chytridiomycetes;Rhizophydiales;Rhizophydiales incertae sedis;Batrachochytrium;Batrachochytrium dendrobatidis;Batrachochytrium dendrobatidis JAM81;
16.12	109	Minc06209	-	1e-07	-	-	-	-	-	-	622747914	27.03	Mycob	Mycobacterium tuberculosis M2191	@Bacteria	1448775	;cellular organisms;Bacteria;Terrabacteria group;Actinobacteria;Actinobacteria;Corynebacteriales;Mycobacteriaceae;Mycobacterium;Mycobacterium tuberculosis complex;Mycobacterium tuberculosis;Mycobacterium tuberculosis M2191;
16.12	109	Minc00379	-	1e-07	-	-	-	-	-	-	491617322	40.7	S_bot	Streptomyces bottropensis	@Bacteria	42235	;cellular organisms;Bacteria;Terrabacteria group;Actinobacteria;Actinobacteria;Streptomycetales;Streptomycetaceae;Streptomyces;Streptomyces bottropensis;
15.42	10	Minc10856	-	-	-	-	2e-07	-	-	-	510792797	41.86	Vibri	Vibrio phage jenny 12G5	@Viruses	573176	;Viruses;dsDNA viruses, no RNA stage;Caudovirales;Siphoviridae;unclassified Siphoviridae;Vibrio phage jenny 12G5;
15.42	183	Minc09890	-	-	2e-26	-	-	-	-	1e-19	470292779	35.9	Capsa	Capsaspora owczarzaki ATCC 30864	@Eukaryota	595528	;cellular organisms;Eukaryota;Opisthokonta;Opisthokonta incertae sedis;Ichthyosporea;Capsaspora;Capsaspora owczarzaki;Capsaspora owczarzaki ATCC 30864;
15.42	198	Minc18568	-	-	1e-26	-	-	-	-	5e-20	281210597	38.02	Polys	Polysphondylium pallidum PN500	@Eukaryota	670386	;cellular organisms;Eukaryota;Amoebozoa;Mycetozoa;Dictyosteliida;Polysphondylium;Polysphondylium pallidum;Polysphondylium pallidum PN500;
15.42	250	Minc04524	-	6e-14	-	-	-	-	-	3e-07	503154489	33.71	I_pol	Ilyobacter polytropus	@Bacteria	167642	;cellular organisms;Bacteria;Fusobacteria;Fusobacteriia;Fusobacteriales;Fusobacteriaceae;Ilyobacter;Ilyobacter polytropus;
15.42	12	Minc06784	-	-	-	-	2e-07	-	-	-	510792797	29.33	Vibri	Vibrio phage jenny 12G5	@Viruses	573176	;Viruses;dsDNA viruses, no RNA stage;Caudovirales;Siphoviridae;unclassified Siphoviridae;Vibrio phage jenny 12G5;
15.42	6	Minc00808	-	-	2e-07	-	-	2e-07	-	-	296083026	29.87	V_vin	Vitis vinifera	@Eukaryota@Viridiplantae	29760	;cellular organisms;Eukaryota;Viridiplantae;Streptophyta;Streptophytina;Embryophyta;Tracheophyta;Euphyllophyta;Spermatophyta;Magnoliophyta;Mesangiospermae;eudicotyledons;Gunneridae;Pentapetalae;rosids;rosids incertae sedis;Vitales;Vitaceae;Vitis;Vitis vinifera;
15.2	38	Minc04173	-	1e-15	-	-	-	-	-	4e-09	504943837	50	Calot	Calothrix sp. PCC 7507	@Bacteria	99598	;cellular organisms;Bacteria;Terrabacteria group;Cyanobacteria/Melainabacteria group;Cyanobacteria;Nostocales;Rivulariaceae;Calothrix;Calothrix sp. PCC 7507;
15.02	9	Minc07747	-	-	3e-07	-	-	-	-	-	574103477	33.67	A_ast	Aphanomyces astaci	@Eukaryota	112090	;cellular organisms;Eukaryota;Stramenopiles;Oomycetes;Saprolegniales;Saprolegniaceae;Aphanomyces;Aphanomyces astaci;
15.02	9	Minc01498	-	-	3e-07	-	-	-	-	-	574103485	31.3	A_ast	Aphanomyces astaci	@Eukaryota	112090	;cellular organisms;Eukaryota;Stramenopiles;Oomycetes;Saprolegniales;Saprolegniaceae;Aphanomyces;Aphanomyces astaci;
15.02	3	Minc08220	-	-	3e-07	-	-	-	-	-	564277811	55.26	Plasm	Plasmodium yoelii 17X	@Eukaryota	1323249	;cellular organisms;Eukaryota;Alveolata;Apicomplexa;Aconoidasida;Haemosporida;Plasmodiidae;Plasmodium;Plasmodium (Vinckeia);Plasmodium yoelii;Plasmodium yoelii 17X;
15.02	250	Minc02550	-	-	3e-21	-	-	-	-	1e-14	514699091	36.59	S_ros	Salpingoeca rosetta	@Eukaryota	946362	;cellular organisms;Eukaryota;Opisthokonta;Choanoflagellida;Craspedida;Salpingoecidae;Salpingoeca;Salpingoeca rosetta;
14.87	250	Minc01686	-	7e-14	-	-	-	-	-	2e-07	503154489	33.71	I_pol	Ilyobacter polytropus	@Bacteria	167642	;cellular organisms;Bacteria;Fusobacteria;Fusobacteriia;Fusobacteriales;Fusobacteriaceae;Ilyobacter;Ilyobacter polytropus;
14.73	1	Minc18099	-	-	4e-07	-	-	-	-	-	82539404	37.84	Plasm	Plasmodium yoelii yoelii 17XNL	@Eukaryota	352914	;cellular organisms;Eukaryota;Alveolata;Apicomplexa;Aconoidasida;Haemosporida;Plasmodiidae;Plasmodium;Plasmodium (Vinckeia);Plasmodium yoelii;Plasmodium yoelii yoelii;Plasmodium yoelii yoelii 17XNL;
14.73	304	Minc07642	-	-	4e-88	-	-	4e-88	-	1e-81	56784556	25.97	Oryza	Oryza sativa Japonica Group	@Eukaryota@Viridiplantae	39947	;cellular organisms;Eukaryota;Viridiplantae;Streptophyta;Streptophytina;Embryophyta;Tracheophyta;Euphyllophyta;Spermatophyta;Magnoliophyta;Mesangiospermae;Liliopsida;Petrosaviidae;commelinids;Poales;Poaceae;BOP clade;Oryzoideae;Oryzeae;Oryzinae;Oryza;Oryza sativa;Oryza sativa Japonica Group;
14.33	225	Minc09416	-	-	6e-35	-	-	-	-	1e-28	330804381	35.65	D_pur	Dictyostelium purpureum	@Eukaryota	5786	;cellular organisms;Eukaryota;Amoebozoa;Mycetozoa;Dictyosteliida;Dictyostelium;Dictyostelium purpureum;
14.33	133	Minc01615	-	-	6e-18	-	-	-	-	1e-11	68061305	9.75	Plasm	Plasmodium berghei ANKA	@Eukaryota	5823	;cellular organisms;Eukaryota;Alveolata;Apicomplexa;Aconoidasida;Haemosporida;Plasmodiidae;Plasmodium;Plasmodium (Vinckeia);Plasmodium berghei;Plasmodium berghei ANKA;
14.04	6	Minc07025	-	8e-07	-	-	-	-	-	-	522122565	32.37	A_alb	Amycolatopsis alba	@Bacteria	76020	;cellular organisms;Bacteria;Terrabacteria group;Actinobacteria;Actinobacteria;Pseudonocardiales;Pseudonocardiaceae;Amycolatopsis;Amycolatopsis alba;
13.92	143	Minc07328	-	9e-07	-	-	-	-	-	-	511035999	36.96	Lachn	Lachnospiraceae bacterium 28-4	@Bacteria	397287	;cellular organisms;Bacteria;Terrabacteria group;Firmicutes;Clostridia;Clostridiales;Lachnospiraceae;unclassified Lachnospiraceae;Lachnospiraceae bacterium 28-4;
13.82	250	Minc10057	-	5e-24	-	-	-	-	-	5e-18	517438996	37.41	U_gan	Uliginosibacterium gangwonense	@Bacteria	392736	;cellular organisms;Bacteria;Proteobacteria;Betaproteobacteria;Rhodocyclales;Zoogloeaceae;Uliginosibacterium;Uliginosibacterium gangwonense;
13.82	250	Minc13276	-	7e-24	-	-	-	-	-	7e-18	521961182	39.74	Z_for	Zavarzinella formosa	@Bacteria	360055	;cellular organisms;Bacteria;PVC group;Planctomycetes;Planctomycetia;Planctomycetales;Gemmataceae;Zavarzinella;Zavarzinella formosa;
13.82	250	Minc13277	-	-	2e-27	-	-	2e-27	-	2e-21	567881047	25.98	C_cle	Citrus clementina	@Eukaryota@Viridiplantae	85681	;cellular organisms;Eukaryota;Viridiplantae;Streptophyta;Streptophytina;Embryophyta;Tracheophyta;Euphyllophyta;Spermatophyta;Magnoliophyta;Mesangiospermae;eudicotyledons;Gunneridae;Pentapetalae;rosids;malvids;Sapindales;Rutaceae;Aurantioideae;Citrus;Citrus clementina;
13.82	8	Minc13280	-	-	1e-06	-	-	-	-	-	323453660	25.95	A_ano	Aureococcus anophagefferens	@Eukaryota	44056	;cellular organisms;Eukaryota;Stramenopiles;Pelagophyceae;Pelagomonadales;Aureococcus;Aureococcus anophagefferens;
13.82	4	Minc00196	-	1e-06	-	-	-	-	-	-	503226954	51.52	Candi	Candidatus Liberibacter solanacearum	@Bacteria	556287	;cellular organisms;Bacteria;Proteobacteria;Alphaproteobacteria;Rhizobiales;Rhizobiaceae;Liberibacter;Candidatus Liberibacter solanacearum;
13.82	250	Minc11352	-	2e-75	-	-	-	-	-	2e-69	516748549	47.31	A_ben	Asticcacaulis benevestitus	@Bacteria	347481	;cellular organisms;Bacteria;Proteobacteria;Alphaproteobacteria;Caulobacterales;Caulobacteraceae;Asticcacaulis;Asticcacaulis benevestitus;
13.82	14	Minc06790	-	-	1e-06	-	-	-	-	-	574103485	35.24	A_ast	Aphanomyces astaci	@Eukaryota	112090	;cellular organisms;Eukaryota;Stramenopiles;Oomycetes;Saprolegniales;Saprolegniaceae;Aphanomyces;Aphanomyces astaci;
13.46	147	Minc08845a	-	-	1e-23	-	-	-	-	7e-18	330804381	30.29	D_pur	Dictyostelium purpureum	@Eukaryota	5786	;cellular organisms;Eukaryota;Amoebozoa;Mycetozoa;Dictyosteliida;Dictyostelium;Dictyostelium purpureum;
13.12	250	Minc07012	-	1e-16	-	-	-	-	-	5e-11	344221800	36.36	M_syn	Mycoplasma synoviae	@Bacteria	2109	;cellular organisms;Bacteria;Terrabacteria group;Tenericutes;Mollicutes;Mycoplasmatales;Mycoplasmataceae;Mycoplasma;Mycoplasma synoviae;
13.12	22	Minc13178	-	2e-06	-	-	-	-	-	-	501018717	23.85	Marin	Marinomonas sp. MWYL1	@Bacteria	400668	;cellular organisms;Bacteria;Proteobacteria;Gammaproteobacteria;Oceanospirillales;Oceanospirillaceae;Marinomonas;Marinomonas sp. MWYL1;
12.72	61	Minc02557	-	-	3e-06	-	-	3e-06	-	-	224093804	34.62	P_tri	Populus trichocarpa	@Eukaryota@Viridiplantae	3694	;cellular organisms;Eukaryota;Viridiplantae;Streptophyta;Streptophytina;Embryophyta;Tracheophyta;Euphyllophyta;Spermatophyta;Magnoliophyta;Mesangiospermae;eudicotyledons;Gunneridae;Pentapetalae;rosids;fabids;Malpighiales;Salicaceae;Saliceae;Populus;Populus trichocarpa;
12.72	1	Minc02596	-	-	3e-06	-	-	-	3e-06	-	550804057	30	Sporo	Sporothrix schenckii ATCC 58251	@Eukaryota@Fungi	1391915	;cellular organisms;Eukaryota;Opisthokonta;Fungi;Dikarya;Ascomycota;saccharomyceta;Pezizomycotina;leotiomyceta;sordariomyceta;Sordariomycetes;Sordariomycetidae;Ophiostomatales;Ophiostomataceae;Sporothrix;Sporothrix schenckii;Sporothrix schenckii ATCC 58251;
12.72	78	Minc16781	-	-	3e-06	-	-	-	3e-06	-	595464687	29.94	Rhizo	Rhizophagus irregularis DAOM 197198w	@Eukaryota@Fungi	1432141	;cellular organisms;Eukaryota;Opisthokonta;Fungi;Mucoromycota;Glomeromycotina;Glomeromycetes;Glomerales;Glomeraceae;Rhizophagus;Rhizophagus irregularis;Rhizophagus irregularis DAOM 197198w;
12.61	250	Minc10589	-	2e-26	-	-	-	-	-	6e-21	517438996	37.86	U_gan	Uliginosibacterium gangwonense	@Bacteria	392736	;cellular organisms;Bacteria;Proteobacteria;Betaproteobacteria;Rhodocyclales;Zoogloeaceae;Uliginosibacterium;Uliginosibacterium gangwonense;
12.43	6	Minc10852	-	-	4e-06	-	-	-	-	-	574103485	31.71	A_ast	Aphanomyces astaci	@Eukaryota	112090	;cellular organisms;Eukaryota;Stramenopiles;Oomycetes;Saprolegniales;Saprolegniaceae;Aphanomyces;Aphanomyces astaci;
12.43	150	Minc14117	-	4e-06	-	-	-	-	-	-	488699754	32.46	C_fus	Cystobacter fuscus	@Bacteria	43	;cellular organisms;Bacteria;Proteobacteria;delta/epsilon subdivisions;Deltaproteobacteria;Myxococcales;Cystobacterineae;Archangiaceae;Cystobacter;Cystobacter fuscus;
12.43	1	Minc02319	-	-	4e-06	-	-	4e-06	-	-	159477155	29.3	C_rei	Chlamydomonas reinhardtii	@Eukaryota@Viridiplantae	3055	;cellular organisms;Eukaryota;Viridiplantae;Chlorophyta;Chlorophyceae;Chlamydomonadales;Chlamydomonadaceae;Chlamydomonas;Chlamydomonas reinhardtii;
12.43	4	Minc04484	-	-	4e-06	-	-	-	-	-	300176614	46	B_hom	Blastocystis hominis	@Eukaryota	12968	;cellular organisms;Eukaryota;Stramenopiles;Blastocystis;Blastocystis hominis;
12.43	81	Minc08843	-	-	4e-16	-	-	-	-	1e-10	330802675	29.1	D_pur	Dictyostelium purpureum	@Eukaryota	5786	;cellular organisms;Eukaryota;Amoebozoa;Mycetozoa;Dictyosteliida;Dictyostelium;Dictyostelium purpureum;
12.32	250	Minc09512	-	4e-78	-	-	-	-	-	9e-73	499590090	66.67	R_fel	Rickettsia felis	@Bacteria	42862	;cellular organisms;Bacteria;Proteobacteria;Alphaproteobacteria;Rickettsiales;Rickettsiaceae;Rickettsieae;Rickettsia;spotted fever group;Rickettsia felis;
12.21	39	Minc07193	-	-	5e-06	-	-	-	-	-	574478947	34.74	A_inv	Aphanomyces invadans	@Eukaryota	157072	;cellular organisms;Eukaryota;Stramenopiles;Oomycetes;Saprolegniales;Saprolegniaceae;Aphanomyces;Aphanomyces invadans;
12.21	7	Minc11949	-	-	-	-	5e-06	-	-	-	423262536	33.61	Liber	Liberibacter phage SC2	@Viruses	941970	;Viruses;dsDNA viruses, no RNA stage;Caudovirales;Podoviridae;unclassified Podoviridae;Liberibacter phage SC2;
12.21	53	Minc04505	-	-	5e-06	-	-	5e-06	-	-	645269045	36.14	P_mum	Prunus mume	@Eukaryota@Viridiplantae	102107	;cellular organisms;Eukaryota;Viridiplantae;Streptophyta;Streptophytina;Embryophyta;Tracheophyta;Euphyllophyta;Spermatophyta;Magnoliophyta;Mesangiospermae;eudicotyledons;Gunneridae;Pentapetalae;rosids;fabids;Rosales;Rosaceae;Maloideae;Amygdaleae;Prunus;Prunus mume;
12.21	4	Minc02495	-	-	-	-	5e-06	-	-	-	510792797	45.56	Vibri	Vibrio phage jenny 12G5	@Viruses	573176	;Viruses;dsDNA viruses, no RNA stage;Caudovirales;Siphoviridae;unclassified Siphoviridae;Vibrio phage jenny 12G5;
12.21	1	Minc03900	-	-	-	-	5e-06	-	-	-	116326716	39.8	Trich	Trichoplusia ni ascovirus 2c	@Viruses	328615	;Viruses;dsDNA viruses, no RNA stage;Ascoviridae;Ascovirus;unclassified Ascovirus;Trichoplusia ni ascovirus 2c;
12.02	2	Minc14354	-	6e-06	-	-	-	-	-	-	517951885	37.96	B_mas	Brevibacillus massiliensis	@Bacteria	1118054	;cellular organisms;Bacteria;Terrabacteria group;Firmicutes;Bacilli;Bacillales;Paenibacillaceae;Brevibacillus;Brevibacillus massiliensis;
11.92	211	Minc09888	-	-	2e-19	-	-	-	-	3e-14	281206177	36.64	Polys	Polysphondylium pallidum PN500	@Eukaryota	670386	;cellular organisms;Eukaryota;Amoebozoa;Mycetozoa;Dictyosteliida;Polysphondylium;Polysphondylium pallidum;Polysphondylium pallidum PN500;
11.74	57	Minc18098	-	-	8e-06	-	-	-	-	-	146197127	37.5	uncul	uncultured symbiotic protist of Hodotermopsis sjoestedti	@Eukaryota	403659	;cellular organisms;Eukaryota;environmental samples;uncultured symbiotic protist of Hodotermopsis sjoestedti;
11.74	2	Minc11601	-	-	8e-06	-	-	-	-	-	403354903	43.53	O_tri	Oxytricha trifallax	@Eukaryota	1172189	;cellular organisms;Eukaryota;Alveolata;Ciliophora;Intramacronucleata;Spirotrichea;Stichotrichia;Sporadotrichida;Oxytrichidae;Oxytrichinae;Oxytricha;Oxytricha trifallax;
11.62	1	Minc14775	-	-	9e-06	-	-	-	9e-06	-	627800755	30.13	Baudo	Baudoinia panamericana UAMH 10762	@Eukaryota@Fungi	717646	;cellular organisms;Eukaryota;Opisthokonta;Fungi;Dikarya;Ascomycota;saccharomyceta;Pezizomycotina;leotiomyceta;dothideomyceta;Dothideomycetes;Dothideomycetidae;Capnodiales;Teratosphaeriaceae;Baudoinia;Baudoinia panamericana;Baudoinia panamericana UAMH 10762;
11.62	11	Minc04509	-	-	9e-06	-	-	-	9e-06	-	587674449	51.85	Fusar	Fusarium oxysporum FOSC 3-a	@Eukaryota@Fungi	909455	;cellular organisms;Eukaryota;Opisthokonta;Fungi;Dikarya;Ascomycota;saccharomyceta;Pezizomycotina;leotiomyceta;sordariomyceta;Sordariomycetes;Hypocreomycetidae;Hypocreales;Nectriaceae;Fusarium;Fusarium oxysporum species complex;Fusarium oxysporum;Fusarium oxysporum FOSC 3-a;
11.62	3	Minc02251	-	-	9e-06	-	-	-	9e-06	-	261198338	27.47	Blast	Blastomyces gilchristii SLH14081	@Eukaryota@Fungi	559298	;cellular organisms;Eukaryota;Opisthokonta;Fungi;Dikarya;Ascomycota;saccharomyceta;Pezizomycotina;leotiomyceta;Eurotiomycetes;Eurotiomycetidae;Onygenales;Ajellomycetaceae;Blastomyces;Blastomyces gilchristii;Blastomyces gilchristii SLH14081;
11.51	12	Minc11829	-	-	1e-05	-	-	-	-	-	323450871	37.93	A_ano	Aureococcus anophagefferens	@Eukaryota	44056	;cellular organisms;Eukaryota;Stramenopiles;Pelagophyceae;Pelagomonadales;Aureococcus;Aureococcus anophagefferens;
11.51	63	Minc06912	-	1e-05	-	-	-	-	-	-	517534977	31.85	B_for	Bacillus fordii	@Bacteria	254759	;cellular organisms;Bacteria;Terrabacteria group;Firmicutes;Bacilli;Bacillales;Bacillaceae;Bacillus;Bacillus fordii;
11.51	6	Minc02046	-	-	1e-05	-	-	-	-	-	237838523	55	Toxop	Toxoplasma gondii ME49	@Eukaryota	508771	;cellular organisms;Eukaryota;Alveolata;Apicomplexa;Conoidasida;Coccidia;Eucoccidiorida;Eimeriorina;Sarcocystidae;Toxoplasma;Toxoplasma gondii;Toxoplasma gondii ME49;
11.51	29	Minc04699	-	1e-05	-	-	-	-	-	-	503859969	29.93	L_iva	Listeria ivanovii	@Bacteria	1638	;cellular organisms;Bacteria;Terrabacteria group;Firmicutes;Bacilli;Bacillales;Listeriaceae;Listeria;Listeria ivanovii;
11.51	7	Minc13403	-	-	1e-05	-	-	-	-	-	403376418	28.64	O_tri	Oxytricha trifallax	@Eukaryota	1172189	;cellular organisms;Eukaryota;Alveolata;Ciliophora;Intramacronucleata;Spirotrichea;Stichotrichia;Sporadotrichida;Oxytrichidae;Oxytrichinae;Oxytricha;Oxytricha trifallax;
11.51	6	Minc05627	-	-	1e-05	-	-	-	-	-	401404500	30.3	Neosp	Neospora caninum Liverpool	@Eukaryota	572307	;cellular organisms;Eukaryota;Alveolata;Apicomplexa;Conoidasida;Coccidia;Eucoccidiorida;Eimeriorina;Sarcocystidae;Neospora;Neospora caninum;Neospora caninum Liverpool;
10.82	3	Minc04575	-	-	2e-05	-	-	2e-05	-	-	567122725	34.48	E_sal	Eutrema salsugineum	@Eukaryota@Viridiplantae	72664	;cellular organisms;Eukaryota;Viridiplantae;Streptophyta;Streptophytina;Embryophyta;Tracheophyta;Euphyllophyta;Spermatophyta;Magnoliophyta;Mesangiospermae;eudicotyledons;Gunneridae;Pentapetalae;rosids;malvids;Brassicales;Brassicaceae;Eutremeae;Eutrema;Eutrema salsugineum;
10.82	1	Minc12072	-	-	2e-05	-	-	-	-	-	627950672	25.55	F_alb	Fonticula alba	@Eukaryota	691883	;cellular organisms;Eukaryota;Opisthokonta;Nucleariidae and Fonticula group;Fonticula;Fonticula alba;
10.82	1	Minc05106	-	2e-05	-	-	-	-	-	-	503226954	38.24	Candi	Candidatus Liberibacter solanacearum	@Bacteria	556287	;cellular organisms;Bacteria;Proteobacteria;Alphaproteobacteria;Rhizobiales;Rhizobiaceae;Liberibacter;Candidatus Liberibacter solanacearum;
10.82	4	Minc15055	-	-	2e-05	-	-	2e-05	-	-	566170162	35.06	P_tri	Populus trichocarpa	@Eukaryota@Viridiplantae	3694	;cellular organisms;Eukaryota;Viridiplantae;Streptophyta;Streptophytina;Embryophyta;Tracheophyta;Euphyllophyta;Spermatophyta;Magnoliophyta;Mesangiospermae;eudicotyledons;Gunneridae;Pentapetalae;rosids;fabids;Malpighiales;Salicaceae;Saliceae;Populus;Populus trichocarpa;
10.82	47	Minc13283	-	-	4e-09	-	-	4e-09	-	0.0002	302802524	29.26	S_moe	Selaginella moellendorffii	@Eukaryota@Viridiplantae	88036	;cellular organisms;Eukaryota;Viridiplantae;Streptophyta;Streptophytina;Embryophyta;Tracheophyta;Lycopodiopsida;Selaginellales;Selaginellaceae;Selaginella;Selaginella moellendorffii;
10.82	250	Minc09038	-	2e-17	-	-	-	-	-	1e-12	640453280	38.46	P_and	Paraburkholderia andropogonis	@Bacteria	28092	;cellular organisms;Bacteria;Proteobacteria;Betaproteobacteria;Burkholderiales;Burkholderiaceae;Paraburkholderia;Paraburkholderia andropogonis;
10.82	12	Minc06786	-	-	2e-05	-	-	-	-	-	574463878	35.11	A_inv	Aphanomyces invadans	@Eukaryota	157072	;cellular organisms;Eukaryota;Stramenopiles;Oomycetes;Saprolegniales;Saprolegniaceae;Aphanomyces;Aphanomyces invadans;
10.53	7	Minc10533	-	-	8e-15	-	-	-	-	3e-10	544216306	31.65	Cyani	Cyanidioschyzon merolae strain 10D	@Eukaryota	280699	;cellular organisms;Eukaryota;Rhodophyta;Bangiophyceae;Cyanidiales;Cyanidiaceae;Cyanidioschyzon;Cyanidioschyzon merolae;Cyanidioschyzon merolae strain 10D;
10.46	250	Minc00027	-	2e-22	-	-	-	-	-	7e-18	517438996	37.41	U_gan	Uliginosibacterium gangwonense	@Bacteria	392736	;cellular organisms;Bacteria;Proteobacteria;Betaproteobacteria;Rhodocyclales;Zoogloeaceae;Uliginosibacterium;Uliginosibacterium gangwonense;
10.41	1	Minc09497	-	-	3e-05	-	-	-	3e-05	-	149246680	32.35	Lodde	Lodderomyces elongisporus NRRL YB-4239	@Eukaryota@Fungi	379508	;cellular organisms;Eukaryota;Opisthokonta;Fungi;Dikarya;Ascomycota;saccharomyceta;Saccharomycotina;Saccharomycetes;Saccharomycetales;Debaryomycetaceae;Candida/Lodderomyces clade;Lodderomyces;Lodderomyces elongisporus;Lodderomyces elongisporus NRRL YB-4239;
10.41	2	Minc10503	-	-	3e-05	-	-	-	3e-05	-	528315245	35	Schiz	Schizosaccharomyces cryophilus OY26	@Eukaryota@Fungi	653667	;cellular organisms;Eukaryota;Opisthokonta;Fungi;Dikarya;Ascomycota;Taphrinomycotina;Schizosaccharomycetes;Schizosaccharomycetales;Schizosaccharomycetaceae;Schizosaccharomyces;Schizosaccharomyces cryophilus;Schizosaccharomyces cryophilus OY26;
10.41	5	Minc01509	-	-	3e-05	-	-	-	-	-	641538910	37.5	Sapro	Saprolegnia parasitica CBS 223.65	@Eukaryota	695850	;cellular organisms;Eukaryota;Stramenopiles;Oomycetes;Saprolegniales;Saprolegniaceae;Saprolegnia;Saprolegnia parasitica;Saprolegnia parasitica CBS 223.65;
10.41	3	Minc00332	-	-	3e-05	-	-	3e-05	-	-	567122725	34.48	E_sal	Eutrema salsugineum	@Eukaryota@Viridiplantae	72664	;cellular organisms;Eukaryota;Viridiplantae;Streptophyta;Streptophytina;Embryophyta;Tracheophyta;Euphyllophyta;Spermatophyta;Magnoliophyta;Mesangiospermae;eudicotyledons;Gunneridae;Pentapetalae;rosids;malvids;Brassicales;Brassicaceae;Eutremeae;Eutrema;Eutrema salsugineum;
10.41	6	Minc13187	-	3e-05	-	-	-	-	-	-	522122565	33.33	A_alb	Amycolatopsis alba	@Bacteria	76020	;cellular organisms;Bacteria;Terrabacteria group;Actinobacteria;Actinobacteria;Pseudonocardiales;Pseudonocardiaceae;Amycolatopsis;Amycolatopsis alba;
10.41	12	Minc11962	-	-	3e-05	-	-	3e-05	-	-	168014013	37.93	P_pat	Physcomitrella patens	@Eukaryota@Viridiplantae	3218	;cellular organisms;Eukaryota;Viridiplantae;Streptophyta;Streptophytina;Embryophyta;Bryophyta;Bryophytina;Bryopsida;Funariidae;Funariales;Funariaceae;Physcomitrella;Physcomitrella patens;
10.41	250	Minc19126	-	3e-56	-	-	-	-	-	1e-51	499903764	41.73	C_hut	Cytophaga hutchinsonii	@Bacteria	985	;cellular organisms;Bacteria;FCB group;Bacteroidetes/Chlorobi group;Bacteroidetes;Cytophagia;Cytophagales;Cytophagaceae;Cytophaga;Cytophaga hutchinsonii;
10.41	1	Minc18364	-	-	3e-05	-	-	3e-05	-	-	222640282	33.65	Oryza	Oryza sativa Japonica Group	@Eukaryota@Viridiplantae	39947	;cellular organisms;Eukaryota;Viridiplantae;Streptophyta;Streptophytina;Embryophyta;Tracheophyta;Euphyllophyta;Spermatophyta;Magnoliophyta;Mesangiospermae;Liliopsida;Petrosaviidae;commelinids;Poales;Poaceae;BOP clade;Oryzoideae;Oryzeae;Oryzinae;Oryza;Oryza sativa;Oryza sativa Japonica Group;
10.41	18	Minc16626b	-	-	6e-09	-	-	-	6e-09	0.0002	530474612	60.87	Colle	Colletotrichum gloeosporioides Cg-14	@Eukaryota@Fungi	1237896	;cellular organisms;Eukaryota;Opisthokonta;Fungi;Dikarya;Ascomycota;saccharomyceta;Pezizomycotina;leotiomyceta;sordariomyceta;Sordariomycetes;Hypocreomycetidae;Glomerellales;Glomerellaceae;Colletotrichum;Colletotrichum gloeosporioides;Colletotrichum gloeosporioides Cg-14;
10.31	250	Minc14205	-	2e-21	-	-	-	-	-	6e-17	517438996	37.41	U_gan	Uliginosibacterium gangwonense	@Bacteria	392736	;cellular organisms;Bacteria;Proteobacteria;Betaproteobacteria;Rhodocyclales;Zoogloeaceae;Uliginosibacterium;Uliginosibacterium gangwonense;
10.31	251	Minc17614	-	-	1e-46	-	-	1e-46	-	3e-42	643717756	43.4	J_cur	Jatropha curcas	@Eukaryota@Viridiplantae	180498	;cellular organisms;Eukaryota;Viridiplantae;Streptophyta;Streptophytina;Embryophyta;Tracheophyta;Euphyllophyta;Spermatophyta;Magnoliophyta;Mesangiospermae;eudicotyledons;Gunneridae;Pentapetalae;rosids;fabids;Malpighiales;Euphorbiaceae;Crotonoideae;Jatropheae;Jatropha;Jatropha curcas;
10.31	250	Minc02089a	-	1e-56	-	-	-	-	-	3e-52	499904749	34.32	C_hut	Cytophaga hutchinsonii	@Bacteria	985	;cellular organisms;Bacteria;FCB group;Bacteroidetes/Chlorobi group;Bacteroidetes;Cytophagia;Cytophagales;Cytophagaceae;Cytophaga;Cytophaga hutchinsonii;
10.26	250	Minc06015	-	7e-32	-	-	-	-	-	2e-27	645566644	54	Cupri	Cupriavidus sp. SK-3	@Bacteria	1470558	;cellular organisms;Bacteria;Proteobacteria;Betaproteobacteria;Burkholderiales;Burkholderiaceae;Cupriavidus;Cupriavidus sp. SK-3;
10.13	3	Minc14654	-	-	4e-05	-	-	-	-	-	577145480	31.29	Plasm	Plasmodium inui San Antonio 1	@Eukaryota	1237626	;cellular organisms;Eukaryota;Alveolata;Apicomplexa;Aconoidasida;Haemosporida;Plasmodiidae;Plasmodium;Plasmodium (Plasmodium);Plasmodium inui;Plasmodium inui San Antonio 1;
10.13	8	Minc02580	-	-	4e-05	-	-	-	4e-05	-	242816801	27.36	Talar	Talaromyces stipitatus ATCC 10500	@Eukaryota@Fungi	441959	;cellular organisms;Eukaryota;Opisthokonta;Fungi;Dikarya;Ascomycota;saccharomyceta;Pezizomycotina;leotiomyceta;Eurotiomycetes;Eurotiomycetidae;Eurotiales;Trichocomaceae;Talaromyces;Talaromyces stipitatus;Talaromyces stipitatus ATCC 10500;
10.13	4	Minc01506	-	4e-05	-	-	-	-	-	-	503226954	43.37	Candi	Candidatus Liberibacter solanacearum	@Bacteria	556287	;cellular organisms;Bacteria;Proteobacteria;Alphaproteobacteria;Rhizobiales;Rhizobiaceae;Liberibacter;Candidatus Liberibacter solanacearum;
10.13	1	Minc12273	-	-	4e-05	-	-	4e-05	-	-	633906523	51.16	Helic	Helicosporidium sp. ATCC 50920	@Eukaryota@Viridiplantae	1291522	;cellular organisms;Eukaryota;Viridiplantae;Chlorophyta;Trebouxiophyceae;Chlorellales;Helicosporidium;Helicosporidium sp. ATCC 50920;
10.13	1	Minc03748	-	4e-05	-	-	-	-	-	-	568605480	55.26	u_bac	uncultured bacterium	@Bacteria	77133	;cellular organisms;Bacteria;environmental samples;uncultured bacterium;
10.13	1	Minc05827	-	-	4e-05	-	-	-	-	-	574463876	37.5	A_inv	Aphanomyces invadans	@Eukaryota	157072	;cellular organisms;Eukaryota;Stramenopiles;Oomycetes;Saprolegniales;Saprolegniaceae;Aphanomyces;Aphanomyces invadans;
10.13	293	Minc08900	-	-	4e-15	-	-	-	-	1e-10	68060237	25.85	Plasm	Plasmodium berghei ANKA	@Eukaryota	5823	;cellular organisms;Eukaryota;Alveolata;Apicomplexa;Aconoidasida;Haemosporida;Plasmodiidae;Plasmodium;Plasmodium (Vinckeia);Plasmodium berghei;Plasmodium berghei ANKA;
10.13	1	Minc14597	-	-	4e-05	-	-	-	-	-	577149071	37.5	Plasm	Plasmodium vinckei petteri	@Eukaryota	138298	;cellular organisms;Eukaryota;Alveolata;Apicomplexa;Aconoidasida;Haemosporida;Plasmodiidae;Plasmodium;Plasmodium (Vinckeia);Plasmodium vinckei;Plasmodium vinckei petteri;
10.01	250	Minc12561	-	-	9e-77	-	-	-	9e-77	2e-72	597993981	35.25	Agari	Agaricus bisporus var. burnettii JB137-S8	@Eukaryota@Fungi	597362	;cellular organisms;Eukaryota;Opisthokonta;Fungi;Dikarya;Basidiomycota;Agaricomycotina;Agaricomycetes;Agaricomycetidae;Agaricales;Agaricaceae;Agaricus;Agaricus bisporus;Agaricus bisporus var. burnettii;Agaricus bisporus var. burnettii JB137-S8;
9.9	15	Minc13218a	-	-	5e-05	-	-	-	5e-05	-	539441855	46.73	Endoc	Endocarpon pusillum Z07020	@Eukaryota@Fungi	1263415	;cellular organisms;Eukaryota;Opisthokonta;Fungi;Dikarya;Ascomycota;saccharomyceta;Pezizomycotina;leotiomyceta;Eurotiomycetes;Chaetothyriomycetidae;Verrucariales;Verrucariaceae;Endocarpon;Endocarpon pusillum;Endocarpon pusillum Z07020;
9.9	758	Minc13742	-	-	2e-23	-	-	-	-	4e-19	340057210	51.3	Trypa	Trypanosoma vivax Y486	@Eukaryota	1055687	;cellular organisms;Eukaryota;Euglenozoa;Kinetoplastida;Trypanosomatidae;Trypanosoma;Duttonella;Trypanosoma vivax;Trypanosoma vivax Y486;
9.9	780	Minc14535	-	-	1e-23	-	-	-	-	2e-19	340057210	51.75	Trypa	Trypanosoma vivax Y486	@Eukaryota	1055687	;cellular organisms;Eukaryota;Euglenozoa;Kinetoplastida;Trypanosomatidae;Trypanosoma;Duttonella;Trypanosoma vivax;Trypanosoma vivax Y486;
9.9	1	Minc03516	-	-	5e-05	-	-	-	5e-05	-	501755016	29.58	Taphr	Taphrina deformans PYCC 5710	@Eukaryota@Fungi	1097556	;cellular organisms;Eukaryota;Opisthokonta;Fungi;Dikarya;Ascomycota;Taphrinomycotina;Taphrinomycetes;Taphrinales;Taphrinaceae;Taphrina;Taphrina deformans;Taphrina deformans PYCC 5710;
9.9	2	Minc01491	-	-	5e-05	-	-	-	-	-	574469359	34.65	A_inv	Aphanomyces invadans	@Eukaryota	157072	;cellular organisms;Eukaryota;Stramenopiles;Oomycetes;Saprolegniales;Saprolegniaceae;Aphanomyces;Aphanomyces invadans;
9.9	47	Minc06253	-	-	1e-11	-	-	-	-	2e-07	66821683	35.48	Dicty	Dictyostelium discoideum AX4	@Eukaryota	352472	;cellular organisms;Eukaryota;Amoebozoa;Mycetozoa;Dictyosteliida;Dictyostelium;Dictyostelium discoideum;Dictyostelium discoideum AX4;
9.72	1	Minc15263	-	-	6e-05	-	-	-	-	-	635366608	24.73	A_can	Albugo candida	@Eukaryota	65357	;cellular organisms;Eukaryota;Stramenopiles;Oomycetes;Albuginales;Albuginaceae;Albugo;Albugo candida;
9.72	1	Minc11053	-	-	6e-05	-	-	-	6e-05	-	576989963	44.44	Rhizo	Rhizoctonia solani AG-3 Rhs1AP	@Eukaryota@Fungi	1086054	;cellular organisms;Eukaryota;Opisthokonta;Fungi;Dikarya;Basidiomycota;Agaricomycotina;Agaricomycetes;Agaricomycetes incertae sedis;Cantharellales;Ceratobasidiaceae;Rhizoctonia;Rhizoctonia solani;Rhizoctonia solani AG-3;Rhizoctonia solani AG-3 Rhs1AP;
9.72	250	Minc16490	-	-	3e-13	-	-	-	-	5e-09	301117968	24.58	Phyto	Phytophthora infestans T30-4	@Eukaryota	403677	;cellular organisms;Eukaryota;Stramenopiles;Oomycetes;Peronosporales;Phytophthora;Phytophthora infestans;Phytophthora infestans T30-4;
9.72	3	Minc00194	-	6e-05	-	-	-	-	-	-	503226954	46.97	Candi	Candidatus Liberibacter solanacearum	@Bacteria	556287	;cellular organisms;Bacteria;Proteobacteria;Alphaproteobacteria;Rhizobiales;Rhizobiaceae;Liberibacter;Candidatus Liberibacter solanacearum;
9.72	1	Minc02442	-	-	6e-05	-	-	-	-	-	323453660	29.27	A_ano	Aureococcus anophagefferens	@Eukaryota	44056	;cellular organisms;Eukaryota;Stramenopiles;Pelagophyceae;Pelagomonadales;Aureococcus;Aureococcus anophagefferens;
9.72	8	Minc00825	-	-	6e-05	-	-	-	-	-	641582587	41.79	P_rei	Plasmodium reichenowi	@Eukaryota	5854	;cellular organisms;Eukaryota;Alveolata;Apicomplexa;Aconoidasida;Haemosporida;Plasmodiidae;Plasmodium;Plasmodium (Laverania);Plasmodium reichenowi;
9.62	250	Minc15345	-	6e-26	-	-	-	-	-	9e-22	647570351	36.62	P_ehi	Paenibacillus ehimensis	@Bacteria	79264	;cellular organisms;Bacteria;Terrabacteria group;Firmicutes;Bacilli;Bacillales;Paenibacillaceae;Paenibacillus;Paenibacillus ehimensis;
9.62	250	Minc16186	-	2e-32	-	-	-	-	-	3e-28	517801142	53.85	R_cel	Rudaea cellulosilytica	@Bacteria	540746	;cellular organisms;Bacteria;Proteobacteria;Gammaproteobacteria;Xanthomonadales;Rhodanobacteraceae;Rudaea;Rudaea cellulosilytica;
9.62	250	Minc17839	-	-	2e-27	-	-	2e-27	-	3e-23	255081989	30.54	M_com	Micromonas commoda	@Eukaryota@Viridiplantae	296587	;cellular organisms;Eukaryota;Viridiplantae;Chlorophyta;prasinophytes;Mamiellophyceae;Mamiellales;Mamiellaceae;Micromonas;Micromonas commoda;
9.57	1	Minc00331b	-	-	7e-05	-	-	-	-	-	123400471	25	Trich	Trichomonas vaginalis G3	@Eukaryota	412133	;cellular organisms;Eukaryota;Parabasalia;Trichomonadida;Trichomonadidae;Trichomonas;Trichomonas vaginalis;Trichomonas vaginalis G3;
9.57	4	Minc00192	-	-	-	-	7e-05	-	-	-	448930461	33.9	Param	Paramecium bursaria Chlorella virus IL-3A	@Viruses	1278256	;Viruses;dsDNA viruses, no RNA stage;Phycodnaviridae;Chlorovirus;unclassified Chlorovirus;Paramecium bursaria Chlorella virus IL-3A;
9.57	1	Minc15989	-	-	7e-05	-	-	-	7e-05	-	470319022	27.78	Pneum	Pneumocystis murina B123	@Eukaryota@Fungi	1069680	;cellular organisms;Eukaryota;Opisthokonta;Fungi;Dikarya;Ascomycota;Taphrinomycotina;Pneumocystidomycetes;Pneumocystidales;Pneumocystidaceae;Pneumocystis;Pneumocystis murina;Pneumocystis murina B123;
9.43	5	Minc17424	-	-	8e-05	-	-	-	8e-05	-	584395453	26.79	Kurai	Kuraishia capsulata CBS 1993	@Eukaryota@Fungi	1382522	;cellular organisms;Eukaryota;Opisthokonta;Fungi;Dikarya;Ascomycota;saccharomyceta;Saccharomycotina;Saccharomycetes;Saccharomycetales;Saccharomycetales incertae sedis;Kuraishia;Kuraishia capsulata;Kuraishia capsulata CBS 1993;
9.43	13	Minc00269	-	-	8e-05	-	-	-	-	-	608675041	46	G_nip	Gregarina niphandrodes	@Eukaryota	110365	;cellular organisms;Eukaryota;Alveolata;Apicomplexa;Conoidasida;Gregarinasina;Eugregarinorida;Gregarinidae;Gregarina;Gregarina niphandrodes;
9.43	1	Minc11806	-	-	8e-05	-	-	-	-	-	546317283	35.85	C_cri	Chondrus crispus	@Eukaryota	2769	;cellular organisms;Eukaryota;Rhodophyta;Florideophyceae;Gigartinales;Gigartinaceae;Chondrus;Chondrus crispus;
9.43	2	Minc01508	-	-	8e-05	-	-	-	-	-	574114114	44.26	A_ast	Aphanomyces astaci	@Eukaryota	112090	;cellular organisms;Eukaryota;Stramenopiles;Oomycetes;Saprolegniales;Saprolegniaceae;Aphanomyces;Aphanomyces astaci;
9.43	1	Minc02778	-	-	8e-05	-	-	-	-	-	470247320	42.11	D_fas	Dictyostelium fasciculatum	@Eukaryota	261658	;cellular organisms;Eukaryota;Amoebozoa;Mycetozoa;Dictyosteliida;Dictyostelium;Dictyostelium fasciculatum;
9.43	1	Minc13286	-	-	8e-05	-	-	-	-	-	84997565	29.87	T_ann	Theileria annulata	@Eukaryota	5874	;cellular organisms;Eukaryota;Alveolata;Apicomplexa;Aconoidasida;Piroplasmida;Theileriidae;Theileria;Theileria annulata;
9.43	1	Minc08983	-	-	8e-05	-	-	-	8e-05	-	528315245	34.48	Schiz	Schizosaccharomyces cryophilus OY26	@Eukaryota@Fungi	653667	;cellular organisms;Eukaryota;Opisthokonta;Fungi;Dikarya;Ascomycota;Taphrinomycotina;Schizosaccharomycetes;Schizosaccharomycetales;Schizosaccharomycetaceae;Schizosaccharomyces;Schizosaccharomyces cryophilus;Schizosaccharomyces cryophilus OY26;
9.43	2	Minc11251	-	-	8e-05	-	-	-	-	-	586729822	22.7	Tetra	Tetrahymena thermophila SB210	@Eukaryota	312017	;cellular organisms;Eukaryota;Alveolata;Ciliophora;Intramacronucleata;Oligohymenophorea;Hymenostomatida;Tetrahymenina;Tetrahymenidae;Tetrahymena;Tetrahymena thermophila;Tetrahymena thermophila SB210;
9.39	252	Minc03042	-	-	5e-28	-	-	5e-28	-	6e-24	565345204	42.58	S_tub	Solanum tuberosum	@Eukaryota@Viridiplantae	4113	;cellular organisms;Eukaryota;Viridiplantae;Streptophyta;Streptophytina;Embryophyta;Tracheophyta;Euphyllophyta;Spermatophyta;Magnoliophyta;Mesangiospermae;eudicotyledons;Gunneridae;Pentapetalae;asterids;lamiids;Solanales;Solanaceae;Solanoideae;Solaneae;Solanum;Solanum tuberosum;
9.32	13	Minc08112	-	-	9e-05	-	-	9e-05	-	-	571514256	28.66	G_max	Glycine max	@Eukaryota@Viridiplantae	3847	;cellular organisms;Eukaryota;Viridiplantae;Streptophyta;Streptophytina;Embryophyta;Tracheophyta;Euphyllophyta;Spermatophyta;Magnoliophyta;Mesangiospermae;eudicotyledons;Gunneridae;Pentapetalae;rosids;fabids;Fabales;Fabaceae;Papilionoideae;Phaseoleae;Glycine;Soja;Glycine max;
9.21	10	Minc18726	-	1e-08	-	-	-	-	-	0.0001	491669402	53.97	C_mat	Corynebacterium matruchotii	@Bacteria	43768	;cellular organisms;Bacteria;Terrabacteria group;Actinobacteria;Actinobacteria;Corynebacteriales;Corynebacteriaceae;Corynebacterium;Corynebacterium matruchotii;
9.21	251	Minc15411	-	2e-22	-	-	-	-	-	2e-18	517438996	36.69	U_gan	Uliginosibacterium gangwonense	@Bacteria	392736	;cellular organisms;Bacteria;Proteobacteria;Betaproteobacteria;Rhodocyclales;Zoogloeaceae;Uliginosibacterium;Uliginosibacterium gangwonense;
9.21	2	Minc04573b	-	-	0.0001	-	-	-	-	-	123400471	24.64	Trich	Trichomonas vaginalis G3	@Eukaryota	412133	;cellular organisms;Eukaryota;Parabasalia;Trichomonadida;Trichomonadidae;Trichomonas;Trichomonas vaginalis;Trichomonas vaginalis G3;
9.21	1	Minc09269	-	0.0001	-	-	-	-	-	-	568605480	52.63	u_bac	uncultured bacterium	@Bacteria	77133	;cellular organisms;Bacteria;environmental samples;uncultured bacterium;
9.21	1	Minc09907	-	-	0.0001	-	-	-	0.0001	-	549042936	30.1	Pyron	Pyronema omphalodes CBS 100304	@Eukaryota@Fungi	1076935	;cellular organisms;Eukaryota;Opisthokonta;Fungi;Dikarya;Ascomycota;saccharomyceta;Pezizomycotina;Pezizomycetes;Pezizales;Pyronemataceae;Pyronema;Pyronema omphalodes;Pyronema omphalodes CBS 100304;
9.21	250	Minc16409	-	-	3e-10	-	-	-	3e-10	3e-06	589270712	44.64	Treme	Tremella mesenterica DSM 1558	@Eukaryota@Fungi	578456	;cellular organisms;Eukaryota;Opisthokonta;Fungi;Dikarya;Basidiomycota;Agaricomycotina;Tremellomycetes;Tremellales;Tremellaceae;Tremella;Tremella mesenterica;Tremella mesenterica DSM 1558;
9.21	9	Minc13407	-	-	0.0001	-	-	-	0.0001	-	595449320	28.41	Rhizo	Rhizophagus irregularis DAOM 197198w	@Eukaryota@Fungi	1432141	;cellular organisms;Eukaryota;Opisthokonta;Fungi;Mucoromycota;Glomeromycotina;Glomeromycetes;Glomerales;Glomeraceae;Rhizophagus;Rhizophagus irregularis;Rhizophagus irregularis DAOM 197198w;
9.21	4	Minc14245	0.0001	-	-	-	-	-	-	-	494239030	35.53	H_lac	Halobiforma lacisalsi	@Archaea	229731	;cellular organisms;Archaea;Euryarchaeota;Halobacteria;Natrialbales;Natrialbaceae;Halobiforma;Halobiforma lacisalsi;
9.21	251	Minc01646	-	-	1e-28	-	-	-	-	1e-24	290995673	56.04	Naegl	Naegleria gruberi strain NEG-M	@Eukaryota	744533	;cellular organisms;Eukaryota;Heterolobosea;Schizopyrenida;Vahlkampfiidae;Naegleria;Naegleria gruberi;Naegleria gruberi strain NEG-M;
9.21	250	Minc11811	-	-	3e-13	-	-	-	3e-13	3e-09	396080897	30	Encep	Encephalitozoon romaleae SJ-2008	@Eukaryota@Fungi	1178016	;cellular organisms;Eukaryota;Opisthokonta;Fungi;Microsporidia;Apansporoblastina;Unikaryonidae;Encephalitozoon;Encephalitozoon romaleae;Encephalitozoon romaleae SJ-2008;
9.21	22	Minc06923	-	-	1e-08	-	-	-	-	0.0001	398025220	30.08	L_don	Leishmania donovani	@Eukaryota	5661	;cellular organisms;Eukaryota;Euglenozoa;Kinetoplastida;Trypanosomatidae;Leishmaniinae;Leishmania;Leishmania;Leishmania donovani species complex;Leishmania donovani;
9.21	7	Minc00477	-	-	0.0001	-	-	-	0.0001	-	302922062	52.38	Nectr	Nectria haematococca mpVI 77-13-4	@Eukaryota@Fungi	660122	;cellular organisms;Eukaryota;Opisthokonta;Fungi;Dikarya;Ascomycota;saccharomyceta;Pezizomycotina;leotiomyceta;sordariomyceta;Sordariomycetes;Hypocreomycetidae;Hypocreales;Nectriaceae;Fusarium;Fusarium solani species complex;Nectria haematococca;Nectria haematococca mpVI;Nectria haematococca mpVI 77-13-4;
9.21	250	Minc07824	-	1e-33	-	-	-	-	-	1e-29	521078415	46.75	H_gan	Hahella ganghwensis	@Bacteria	286420	;cellular organisms;Bacteria;Proteobacteria;Gammaproteobacteria;Oceanospirillales;Hahellaceae;Hahella;Hahella ganghwensis;
9.09	15	Minc00594	-	-	9e-08	-	-	-	-	0.0008	82704483	28.81	Plasm	Plasmodium yoelii yoelii 17XNL	@Eukaryota	352914	;cellular organisms;Eukaryota;Alveolata;Apicomplexa;Aconoidasida;Haemosporida;Plasmodiidae;Plasmodium;Plasmodium (Vinckeia);Plasmodium yoelii;Plasmodium yoelii yoelii;Plasmodium yoelii yoelii 17XNL;
8.99	250	Minc07338	-	-	1e-15	-	-	-	-	8e-12	290977158	29.59	Naegl	Naegleria gruberi strain NEG-M	@Eukaryota	744533	;cellular organisms;Eukaryota;Heterolobosea;Schizopyrenida;Vahlkampfiidae;Naegleria;Naegleria gruberi;Naegleria gruberi strain NEG-M;
8.7	250	Minc10411	-	1e-35	-	-	-	-	-	6e-32	563448665	35.78	Mesor	Mesorhizobium sp. LSJC280B00	@Bacteria	1287336	;cellular organisms;Bacteria;Proteobacteria;Alphaproteobacteria;Rhizobiales;Phyllobacteriaceae;Mesorhizobium;Mesorhizobium sp. LSJC280B00;
8.62	250	Minc15801	-	9e-16	-	-	-	-	-	5e-12	505093685	35.96	T_mob	Thioflavicoccus mobilis	@Bacteria	80679	;cellular organisms;Bacteria;Proteobacteria;Gammaproteobacteria;Chromatiales;Chromatiaceae;Thioflavicoccus;Thioflavicoccus mobilis;
8.52	5	Minc04933	-	-	0.0002	-	-	-	0.0002	-	594712692	47.46	M_rob	Metarhizium robertsii	@Eukaryota@Fungi	568076	;cellular organisms;Eukaryota;Opisthokonta;Fungi;Dikarya;Ascomycota;saccharomyceta;Pezizomycotina;leotiomyceta;sordariomyceta;Sordariomycetes;Hypocreomycetidae;Hypocreales;Clavicipitaceae;Metarhizium;Metarhizium robertsii;
8.52	4	Minc14563	-	-	0.0002	-	-	-	-	-	154338415	32.41	Leish	Leishmania braziliensis MHOM/BR/75/M2904	@Eukaryota	420245	;cellular organisms;Eukaryota;Euglenozoa;Kinetoplastida;Trypanosomatidae;Leishmaniinae;Leishmania;Viannia;Leishmania braziliensis species complex;Leishmania braziliensis;Leishmania braziliensis MHOM/BR/75/M2904;
8.52	11	Minc18449	-	0.0002	-	-	-	-	-	-	488790089	38.95	T_sac	Treponema saccharophilum	@Bacteria	165	;cellular organisms;Bacteria;Spirochaetes;Spirochaetia;Spirochaetales;Spirochaetaceae;Treponema;Treponema saccharophilum;
8.52	1	Minc12261	-	-	0.0002	-	-	-	0.0002	-	568121096	26.92	Cyphe	Cyphellophora europaea CBS 101466	@Eukaryota@Fungi	1220924	;cellular organisms;Eukaryota;Opisthokonta;Fungi;Dikarya;Ascomycota;saccharomyceta;Pezizomycotina;leotiomyceta;Eurotiomycetes;Chaetothyriomycetidae;Chaetothyriales;Cyphellophoraceae;Cyphellophora;Cyphellophora europaea;Cyphellophora europaea CBS 101466;
8.52	3	Minc03871	-	-	0.0002	-	-	-	-	-	530740366	26.81	Sapro	Saprolegnia diclina VS20	@Eukaryota	1156394	;cellular organisms;Eukaryota;Stramenopiles;Oomycetes;Saprolegniales;Saprolegniaceae;Saprolegnia;Saprolegnia diclina;Saprolegnia diclina VS20;
8.52	250	Minc11838	-	-	2e-34	-	-	-	-	1e-30	544216306	28.46	Cyani	Cyanidioschyzon merolae strain 10D	@Eukaryota	280699	;cellular organisms;Eukaryota;Rhodophyta;Bangiophyceae;Cyanidiales;Cyanidiaceae;Cyanidioschyzon;Cyanidioschyzon merolae;Cyanidioschyzon merolae strain 10D;
8.52	1	Minc01488	-	0.0002	-	-	-	-	-	-	503226954	43.96	Candi	Candidatus Liberibacter solanacearum	@Bacteria	556287	;cellular organisms;Bacteria;Proteobacteria;Alphaproteobacteria;Rhizobiales;Rhizobiaceae;Liberibacter;Candidatus Liberibacter solanacearum;
8.52	250	Minc08366	-	-	2e-69	-	-	-	2e-69	1e-65	213403758	52.56	Schiz	Schizosaccharomyces japonicus yFS275	@Eukaryota@Fungi	402676	;cellular organisms;Eukaryota;Opisthokonta;Fungi;Dikarya;Ascomycota;Taphrinomycotina;Schizosaccharomycetes;Schizosaccharomycetales;Schizosaccharomycetaceae;Schizosaccharomyces;Schizosaccharomyces japonicus;Schizosaccharomyces japonicus yFS275;
8.52	1	Minc01624	-	0.0002	-	-	-	-	-	-	498278879	57.58	Rhodo	Rhodococcus sp. P14	@Bacteria	450821	;cellular organisms;Bacteria;Terrabacteria group;Actinobacteria;Actinobacteria;Corynebacteriales;Nocardiaceae;Rhodococcus;Rhodococcus sp. P14;
8.52	1	Minc16963	-	-	0.0002	-	-	-	0.0002	-	575471542	55.56	Batra	Batrachochytrium dendrobatidis JAM81	@Eukaryota@Fungi	684364	;cellular organisms;Eukaryota;Opisthokonta;Fungi;Chytridiomycota;Chytridiomycetes;Rhizophydiales;Rhizophydiales incertae sedis;Batrachochytrium;Batrachochytrium dendrobatidis;Batrachochytrium dendrobatidis JAM81;
8.52	1	Minc05670	-	-	0.0002	-	-	-	-	-	546317283	35.43	C_cri	Chondrus crispus	@Eukaryota	2769	;cellular organisms;Eukaryota;Rhodophyta;Florideophyceae;Gigartinales;Gigartinaceae;Chondrus;Chondrus crispus;
8.52	250	Minc13244	-	-	1e-15	-	-	-	-	5e-12	290977158	29.59	Naegl	Naegleria gruberi strain NEG-M	@Eukaryota	744533	;cellular organisms;Eukaryota;Heterolobosea;Schizopyrenida;Vahlkampfiidae;Naegleria;Naegleria gruberi;Naegleria gruberi strain NEG-M;
8.52	2	Minc10235	-	0.0002	-	-	-	-	-	-	525978488	72	Enter	Enterobacteriaceae	@Bacteria	543	;cellular organisms;Bacteria;Proteobacteria;Gammaproteobacteria;Enterobacterales;Enterobacteriaceae;
8.52	4	Minc09612	-	-	0.0002	-	-	-	0.0002	-	85089553	30.36	Neuro	Neurospora crassa OR74A	@Eukaryota@Fungi	367110	;cellular organisms;Eukaryota;Opisthokonta;Fungi;Dikarya;Ascomycota;saccharomyceta;Pezizomycotina;leotiomyceta;sordariomyceta;Sordariomycetes;Sordariomycetidae;Sordariales;Sordariaceae;Neurospora;Neurospora crassa;Neurospora crassa OR74A;
8.52	1	Minc03058	-	-	0.0002	-	-	-	0.0002	-	367023639	60.53	Therm	Thermothelomyces thermophila ATCC 42464	@Eukaryota@Fungi	573729	;cellular organisms;Eukaryota;Opisthokonta;Fungi;Dikarya;Ascomycota;saccharomyceta;Pezizomycotina;leotiomyceta;sordariomyceta;Sordariomycetes;Sordariomycetidae;Sordariales;Chaetomiaceae;Thermothelomyces;Thermothelomyces thermophila;Thermothelomyces thermophila ATCC 42464;
8.52	57	Minc19084	-	-	2e-09	-	-	-	-	1e-05	330804381	36.71	D_pur	Dictyostelium purpureum	@Eukaryota	5786	;cellular organisms;Eukaryota;Amoebozoa;Mycetozoa;Dictyosteliida;Dictyostelium;Dictyostelium purpureum;
8.52	1	Minc18195	-	-	0.0002	-	-	-	-	-	528242643	28.97	A_dea	Angomonas deanei	@Eukaryota	59799	;cellular organisms;Eukaryota;Euglenozoa;Kinetoplastida;Trypanosomatidae;Strigomonadinae;Angomonas;Angomonas deanei;
8.52	1	Minc00672	-	-	0.0002	-	-	-	0.0002	-	389634047	28.21	Magna	Magnaporthe oryzae 70-15	@Eukaryota@Fungi	242507	;cellular organisms;Eukaryota;Opisthokonta;Fungi;Dikarya;Ascomycota;saccharomyceta;Pezizomycotina;leotiomyceta;sordariomyceta;Sordariomycetes;Sordariomycetidae;Magnaporthales;Magnaporthaceae;Magnaporthe;Magnaporthe oryzae;Magnaporthe oryzae 70-15;
8.29	107	Minc18194	-	-	5e-08	-	-	-	-	0.0002	608660418	54.76	G_nip	Gregarina niphandrodes	@Eukaryota	110365	;cellular organisms;Eukaryota;Alveolata;Apicomplexa;Conoidasida;Gregarinasina;Eugregarinorida;Gregarinidae;Gregarina;Gregarina niphandrodes;
8.29	250	Minc12114	-	1e-26	-	-	-	-	-	4e-23	517438996	34.44	U_gan	Uliginosibacterium gangwonense	@Bacteria	392736	;cellular organisms;Bacteria;Proteobacteria;Betaproteobacteria;Rhodocyclales;Zoogloeaceae;Uliginosibacterium;Uliginosibacterium gangwonense;
8.29	40	Minc10029	-	-	1e-07	-	-	-	-	0.0004	546297396	52	C_cri	Chondrus crispus	@Eukaryota	2769	;cellular organisms;Eukaryota;Rhodophyta;Florideophyceae;Gigartinales;Gigartinaceae;Chondrus;Chondrus crispus;
8.23	250	Minc15665	-	-	8e-09	-	-	8e-09	-	3e-05	475621007	31.25	A_tau	Aegilops tauschii	@Eukaryota@Viridiplantae	37682	;cellular organisms;Eukaryota;Viridiplantae;Streptophyta;Streptophytina;Embryophyta;Tracheophyta;Euphyllophyta;Spermatophyta;Magnoliophyta;Mesangiospermae;Liliopsida;Petrosaviidae;commelinids;Poales;Poaceae;BOP clade;Pooideae;Triticodae;Triticeae;Triticinae;Aegilops;Aegilops tauschii;
8.16	251	Minc18041	-	2e-32	-	-	-	-	-	7e-29	500205325	44.08	B_vie	Burkholderia vietnamiensis	@Bacteria	60552	;cellular organisms;Bacteria;Proteobacteria;Betaproteobacteria;Burkholderiales;Burkholderiaceae;Burkholderia;Burkholderia cepacia complex;Burkholderia vietnamiensis;
8.16	3	Minc05235	-	-	2e-07	-	-	-	-	0.0007	156097045	36.59	Plasm	Plasmodium vivax Sal-1	@Eukaryota	126793	;cellular organisms;Eukaryota;Alveolata;Apicomplexa;Aconoidasida;Haemosporida;Plasmodiidae;Plasmodium;Plasmodium (Plasmodium);Plasmodium vivax;Plasmodium vivax Sal-1;
8.11	1	Minc13139	-	-	0.0003	-	-	-	0.0003	-	302666705	27.23	Trich	Trichophyton verrucosum HKI 0517	@Eukaryota@Fungi	663202	;cellular organisms;Eukaryota;Opisthokonta;Fungi;Dikarya;Ascomycota;saccharomyceta;Pezizomycotina;leotiomyceta;Eurotiomycetes;Eurotiomycetidae;Onygenales;Arthrodermataceae;Trichophyton;Trichophyton verrucosum;Trichophyton verrucosum HKI 0517;
8.11	1	Minc18345	-	-	0.0003	-	-	-	-	-	167392159	29.1	Entam	Entamoeba dispar SAW760	@Eukaryota	370354	;cellular organisms;Eukaryota;Amoebozoa;Archamoebae;Entamoebidae;Entamoeba;Entamoeba dispar;Entamoeba dispar SAW760;
8.11	1	Minc11608	-	-	0.0003	-	-	-	0.0003	-	528062441	50	Schiz	Schizosaccharomyces octosporus yFS286	@Eukaryota@Fungi	483514	;cellular organisms;Eukaryota;Opisthokonta;Fungi;Dikarya;Ascomycota;Taphrinomycotina;Schizosaccharomycetes;Schizosaccharomycetales;Schizosaccharomycetaceae;Schizosaccharomyces;Schizosaccharomyces octosporus;Schizosaccharomyces octosporus yFS286;
8.11	1	Minc07896	-	-	0.0003	-	-	-	-	-	545709297	36.84	G_sul	Galdieria sulphuraria	@Eukaryota	130081	;cellular organisms;Eukaryota;Rhodophyta;Bangiophyceae;Cyanidiales;Cyanidiaceae;Galdieria;Galdieria sulphuraria;
8.11	2	Minc15378	-	-	0.0003	-	-	-	0.0003	-	526196943	38.03	Dacty	Dactylellina haptotyla CBS 200.50	@Eukaryota@Fungi	1284197	;cellular organisms;Eukaryota;Opisthokonta;Fungi;Dikarya;Ascomycota;saccharomyceta;Pezizomycotina;Orbiliomycetes;Orbiliales;Orbiliaceae;Dactylellina;Dactylellina haptotyla;Dactylellina haptotyla CBS 200.50;
8.01	251	Minc16421	-	-	2e-51	-	-	2e-51	-	6e-48	326505628	55	Horde	Hordeum vulgare subsp. vulgare	@Eukaryota@Viridiplantae	112509	;cellular organisms;Eukaryota;Viridiplantae;Streptophyta;Streptophytina;Embryophyta;Tracheophyta;Euphyllophyta;Spermatophyta;Magnoliophyta;Mesangiospermae;Liliopsida;Petrosaviidae;commelinids;Poales;Poaceae;BOP clade;Pooideae;Triticodae;Triticeae;Hordeinae;Hordeum;Hordeum vulgare;Hordeum vulgare subsp. vulgare;
8.01	34	Minc08847	-	-	2e-13	-	-	-	-	6e-10	470292779	31.69	Capsa	Capsaspora owczarzaki ATCC 30864	@Eukaryota	595528	;cellular organisms;Eukaryota;Opisthokonta;Opisthokonta incertae sedis;Ichthyosporea;Capsaspora;Capsaspora owczarzaki;Capsaspora owczarzaki ATCC 30864;
7.82	5	Minc09669	-	4e-07	-	-	-	-	-	0.001	517536579	50	B_for	Bacillus fordii	@Bacteria	254759	;cellular organisms;Bacteria;Terrabacteria group;Firmicutes;Bacilli;Bacillales;Bacillaceae;Bacillus;Bacillus fordii;
7.82	2	Minc15940	-	-	0.0004	-	-	-	-	-	574989756	27.55	Plasm	Plasmodium falciparum MaliPS096_E11	@Eukaryota	1036727	;cellular organisms;Eukaryota;Alveolata;Apicomplexa;Aconoidasida;Haemosporida;Plasmodiidae;Plasmodium;Plasmodium (Laverania);Plasmodium falciparum;Plasmodium falciparum MaliPS096_E11;
7.82	2	Minc11486	-	0.0004	-	-	-	-	-	-	503226954	30.41	Candi	Candidatus Liberibacter solanacearum	@Bacteria	556287	;cellular organisms;Bacteria;Proteobacteria;Alphaproteobacteria;Rhizobiales;Rhizobiaceae;Liberibacter;Candidatus Liberibacter solanacearum;
7.82	250	Minc16333	-	-	8e-51	-	-	-	8e-51	2e-47	568114485	42.48	Cyphe	Cyphellophora europaea CBS 101466	@Eukaryota@Fungi	1220924	;cellular organisms;Eukaryota;Opisthokonta;Fungi;Dikarya;Ascomycota;saccharomyceta;Pezizomycotina;leotiomyceta;Eurotiomycetes;Chaetothyriomycetidae;Chaetothyriales;Cyphellophoraceae;Cyphellophora;Cyphellophora europaea;Cyphellophora europaea CBS 101466;
7.82	1	Minc00058	-	-	0.0004	-	-	-	0.0004	-	589284882	30.43	Treme	Tremella mesenterica DSM 1558	@Eukaryota@Fungi	578456	;cellular organisms;Eukaryota;Opisthokonta;Fungi;Dikarya;Basidiomycota;Agaricomycotina;Tremellomycetes;Tremellales;Tremellaceae;Tremella;Tremella mesenterica;Tremella mesenterica DSM 1558;
7.82	1	Minc16615	-	-	0.0004	-	-	-	0.0004	-	170084853	27.21	Lacca	Laccaria bicolor S238N-H82	@Eukaryota@Fungi	486041	;cellular organisms;Eukaryota;Opisthokonta;Fungi;Dikarya;Basidiomycota;Agaricomycotina;Agaricomycetes;Agaricomycetidae;Agaricales;Tricholomataceae;Laccaria;Laccaria bicolor;Laccaria bicolor S238N-H82;
7.82	65	Minc11928b	-	0.0004	-	-	-	-	-	-	519329442	32.18	S_afg	Streptomyces afghaniensis	@Bacteria	66865	;cellular organisms;Bacteria;Terrabacteria group;Actinobacteria;Actinobacteria;Streptomycetales;Streptomycetaceae;Streptomyces;Streptomyces afghaniensis;
7.82	1	Minc11596	-	-	0.0004	-	-	-	-	-	330800279	32.22	D_pur	Dictyostelium purpureum	@Eukaryota	5786	;cellular organisms;Eukaryota;Amoebozoa;Mycetozoa;Dictyosteliida;Dictyostelium;Dictyostelium purpureum;
7.82	239	Minc05634	-	-	2e-13	-	-	2e-13	-	5e-10	145337309	23.63	A_tha	Arabidopsis thaliana	@Eukaryota@Viridiplantae	3702	;cellular organisms;Eukaryota;Viridiplantae;Streptophyta;Streptophytina;Embryophyta;Tracheophyta;Euphyllophyta;Spermatophyta;Magnoliophyta;Mesangiospermae;eudicotyledons;Gunneridae;Pentapetalae;rosids;malvids;Brassicales;Brassicaceae;Camelineae;Arabidopsis;Arabidopsis thaliana;
7.72	250	Minc02595	-	4e-13	-	-	-	-	-	9e-10	648575081	61.67	Arthr	Arthrobacter	@Bacteria	1663	;cellular organisms;Bacteria;Terrabacteria group;Actinobacteria;Actinobacteria;Micrococcales;Micrococcaceae;Arthrobacter;
7.71	250	Minc16113	-	-	9e-12	-	-	-	-	2e-08	167523026	67.5	Monos	Monosiga brevicollis MX1	@Eukaryota	431895	;cellular organisms;Eukaryota;Opisthokonta;Choanoflagellida;Craspedida;Salpingoecidae;Monosiga;Monosiga brevicollis;Monosiga brevicollis MX1;
7.6	1	Minc02346	-	-	0.0005	-	-	-	0.0005	-	389634047	28.21	Magna	Magnaporthe oryzae 70-15	@Eukaryota@Fungi	242507	;cellular organisms;Eukaryota;Opisthokonta;Fungi;Dikarya;Ascomycota;saccharomyceta;Pezizomycotina;leotiomyceta;sordariomyceta;Sordariomycetes;Sordariomycetidae;Magnaporthales;Magnaporthaceae;Magnaporthe;Magnaporthe oryzae;Magnaporthe oryzae 70-15;
7.6	250	Minc05426	-	1e-41	-	-	-	-	-	2e-38	511820702	47.95	A_alb	Agarivorans albus	@Bacteria	182262	;cellular organisms;Bacteria;Proteobacteria;Gammaproteobacteria;Alteromonadales;Alteromonadaceae;Agarivorans;Agarivorans albus;
7.6	250	Minc07608	-	-	1e-21	-	-	-	1e-21	2e-18	300702372	30.74	Nosem	Nosema ceranae BRL01	@Eukaryota@Fungi	578460	;cellular organisms;Eukaryota;Opisthokonta;Fungi;Microsporidia;Apansporoblastina;Nosematidae;Nosema;Nosema ceranae;Nosema ceranae BRL01;
7.6	1	Minc14613	-	-	0.0005	-	-	-	0.0005	-	19112383	56.67	Schiz	Schizosaccharomyces pombe 972h-	@Eukaryota@Fungi	284812	;cellular organisms;Eukaryota;Opisthokonta;Fungi;Dikarya;Ascomycota;Taphrinomycotina;Schizosaccharomycetes;Schizosaccharomycetales;Schizosaccharomycetaceae;Schizosaccharomyces;Schizosaccharomyces pombe;Schizosaccharomyces pombe 972h-;
7.6	1	Minc11768	-	-	0.0005	-	-	-	-	-	145521372	35.59	Param	Paramecium tetraurelia strain d4-2	@Eukaryota	412030	;cellular organisms;Eukaryota;Alveolata;Ciliophora;Intramacronucleata;Oligohymenophorea;Peniculida;Parameciidae;Paramecium;Paramecium tetraurelia;Paramecium tetraurelia strain d4-2;
7.42	2	Minc19107	-	-	0.0006	-	-	-	-	-	67469667	41.67	Entam	Entamoeba histolytica HM-1:IMSS	@Eukaryota	294381	;cellular organisms;Eukaryota;Amoebozoa;Archamoebae;Entamoebidae;Entamoeba;Entamoeba histolytica;Entamoeba histolytica HM-1:IMSS;
7.42	1	Minc18525	-	-	0.0006	-	-	-	-	-	145507746	35	Param	Paramecium tetraurelia strain d4-2	@Eukaryota	412030	;cellular organisms;Eukaryota;Alveolata;Ciliophora;Intramacronucleata;Oligohymenophorea;Peniculida;Parameciidae;Paramecium;Paramecium tetraurelia;Paramecium tetraurelia strain d4-2;
7.42	1	Minc04296	-	0.0006	-	-	-	-	-	-	497460252	49.18	Janib	Janibacter sp. HTCC2649	@Bacteria	313589	;cellular organisms;Bacteria;Terrabacteria group;Actinobacteria;Actinobacteria;Micrococcales;Intrasporangiaceae;Janibacter;Janibacter sp. HTCC2649;
7.42	4	Minc10931b	-	0.0006	-	-	-	-	-	-	644392699	32.63	B_bac	Bdellovibrio bacteriovorus	@Bacteria	959	;cellular organisms;Bacteria;Proteobacteria;delta/epsilon subdivisions;Deltaproteobacteria;Bdellovibrionales;Bdellovibrionaceae;Bdellovibrio;Bdellovibrio bacteriovorus;
7.42	2	Minc07905	0.0006	-	-	-	-	-	-	-	494239030	32.89	H_lac	Halobiforma lacisalsi	@Archaea	229731	;cellular organisms;Archaea;Euryarchaeota;Halobacteria;Natrialbales;Natrialbaceae;Halobiforma;Halobiforma lacisalsi;
7.42	1	Minc11810	-	-	0.0006	-	-	-	0.0006	-	607963601	37.5	Trich	Trichophyton rubrum MR1459	@Eukaryota@Fungi	1215341	;cellular organisms;Eukaryota;Opisthokonta;Fungi;Dikarya;Ascomycota;saccharomyceta;Pezizomycotina;leotiomyceta;Eurotiomycetes;Eurotiomycetidae;Onygenales;Arthrodermataceae;Trichophyton;Trichophyton rubrum;Trichophyton rubrum MR1459;
7.42	2	Minc14460	-	-	0.0006	-	-	-	-	-	67469667	41.67	Entam	Entamoeba histolytica HM-1:IMSS	@Eukaryota	294381	;cellular organisms;Eukaryota;Amoebozoa;Archamoebae;Entamoebidae;Entamoeba;Entamoeba histolytica;Entamoeba histolytica HM-1:IMSS;
7.26	250	Minc12829	-	7e-13	-	-	-	-	-	1e-09	518689579	34	Desul	Desulfitobacterium sp. PCE1	@Bacteria	146907	;cellular organisms;Bacteria;Terrabacteria group;Firmicutes;Clostridia;Clostridiales;Peptococcaceae;Desulfitobacterium;Desulfitobacterium sp. PCE1;
7.13	1	Minc14770	-	-	0.0008	-	-	-	0.0008	-	528062441	43.48	Schiz	Schizosaccharomyces octosporus yFS286	@Eukaryota@Fungi	483514	;cellular organisms;Eukaryota;Opisthokonta;Fungi;Dikarya;Ascomycota;Taphrinomycotina;Schizosaccharomycetes;Schizosaccharomycetales;Schizosaccharomycetaceae;Schizosaccharomyces;Schizosaccharomyces octosporus;Schizosaccharomyces octosporus yFS286;
7.13	1	Minc06825	-	0.0008	-	-	-	-	-	-	493545876	26.56	L_muc	Lactobacillus mucosae	@Bacteria	97478	;cellular organisms;Bacteria;Terrabacteria group;Firmicutes;Bacilli;Lactobacillales;Lactobacillaceae;Lactobacillus;Lactobacillus mucosae;
7.13	55	Minc00344	-	-	0.0008	-	-	-	0.0008	-	363747800	35.32	Eremo	Eremothecium cymbalariae DBVPG#7215	@Eukaryota@Fungi	931890	;cellular organisms;Eukaryota;Opisthokonta;Fungi;Dikarya;Ascomycota;saccharomyceta;Saccharomycotina;Saccharomycetes;Saccharomycetales;Saccharomycetaceae;Eremothecium;Eremothecium cymbalariae;Eremothecium cymbalariae DBVPG#7215;
7.13	2	Minc12453	-	-	0.0008	-	-	-	-	-	67469667	40	Entam	Entamoeba histolytica HM-1:IMSS	@Eukaryota	294381	;cellular organisms;Eukaryota;Amoebozoa;Archamoebae;Entamoebidae;Entamoeba;Entamoeba histolytica;Entamoeba histolytica HM-1:IMSS;
7.13	3	Minc12308	-	-	0.0008	-	-	-	0.0008	-	396475251	61.36	Lepto	Leptosphaeria maculans JN3	@Eukaryota@Fungi	985895	;cellular organisms;Eukaryota;Opisthokonta;Fungi;Dikarya;Ascomycota;saccharomyceta;Pezizomycotina;leotiomyceta;dothideomyceta;Dothideomycetes;Pleosporomycetidae;Pleosporales;Pleosporineae;Leptosphaeriaceae;Leptosphaeria;Leptosphaeria maculans species complex;Leptosphaeria maculans;Leptosphaeria maculans 'brassicae' group;Leptosphaeria maculans JN3;
7.06	250	Minc02908	-	-	6e-22	-	-	-	-	7e-19	471195568	25.3	Entam	Entamoeba invadens IP1	@Eukaryota	370355	;cellular organisms;Eukaryota;Amoebozoa;Archamoebae;Entamoebidae;Entamoeba;Entamoeba invadens;Entamoeba invadens IP1;
7.01	1	Minc19153	-	-	0.0009	-	-	-	0.0009	-	573993559	30.08	Cordy	Cordyceps militaris CM01	@Eukaryota@Fungi	983644	;cellular organisms;Eukaryota;Opisthokonta;Fungi;Dikarya;Ascomycota;saccharomyceta;Pezizomycotina;leotiomyceta;sordariomyceta;Sordariomycetes;Hypocreomycetidae;Hypocreales;Cordycipitaceae;Cordyceps;Cordyceps militaris;Cordyceps militaris CM01;
7.01	1	Minc14791	-	-	0.0009	-	-	-	0.0009	-	587674449	50	Fusar	Fusarium oxysporum FOSC 3-a	@Eukaryota@Fungi	909455	;cellular organisms;Eukaryota;Opisthokonta;Fungi;Dikarya;Ascomycota;saccharomyceta;Pezizomycotina;leotiomyceta;sordariomyceta;Sordariomycetes;Hypocreomycetidae;Hypocreales;Nectriaceae;Fusarium;Fusarium oxysporum species complex;Fusarium oxysporum;Fusarium oxysporum FOSC 3-a;
6.91	250	Minc08887	-	3e-25	-	-	-	-	-	3e-22	517438996	33.96	U_gan	Uliginosibacterium gangwonense	@Bacteria	392736	;cellular organisms;Bacteria;Proteobacteria;Betaproteobacteria;Rhodocyclales;Zoogloeaceae;Uliginosibacterium;Uliginosibacterium gangwonense;
6.91	319	Minc01316	-	-	4e-14	-	-	-	-	4e-11	124806269	66.67	Plasm	Plasmodium falciparum 3D7	@Eukaryota	36329	;cellular organisms;Eukaryota;Alveolata;Apicomplexa;Aconoidasida;Haemosporida;Plasmodiidae;Plasmodium;Plasmodium (Laverania);Plasmodium falciparum;Plasmodium falciparum 3D7;
6.91	2	Minc13904	-	-	0.001	-	-	-	-	-	568018842	26.32	P_par	Phytophthora parasitica	@Eukaryota	4792	;cellular organisms;Eukaryota;Stramenopiles;Oomycetes;Peronosporales;Phytophthora;Phytophthora parasitica;
6.91	240	Minc02570	-	-	2e-08	-	-	2e-08	-	2e-05	224120262	36.84	P_tri	Populus trichocarpa	@Eukaryota@Viridiplantae	3694	;cellular organisms;Eukaryota;Viridiplantae;Streptophyta;Streptophytina;Embryophyta;Tracheophyta;Euphyllophyta;Spermatophyta;Magnoliophyta;Mesangiospermae;eudicotyledons;Gunneridae;Pentapetalae;rosids;fabids;Malpighiales;Salicaceae;Saliceae;Populus;Populus trichocarpa;
6.91	17	Minc00062	-	3e-09	-	-	-	-	-	3e-06	29027491	43.84	Aster	Aster yellows phytoplasma	@Bacteria	35779	;cellular organisms;Bacteria;Terrabacteria group;Tenericutes;Mollicutes;Acholeplasmatales;Acholeplasmataceae;Candidatus Phytoplasma;Candidatus Phytoplasma asteris;Aster yellows phytoplasma;
6.91	250	Minc13041	-	-	1e-14	-	-	-	-	1e-11	145528089	34.03	Param	Paramecium tetraurelia strain d4-2	@Eukaryota	412030	;cellular organisms;Eukaryota;Alveolata;Ciliophora;Intramacronucleata;Oligohymenophorea;Peniculida;Parameciidae;Paramecium;Paramecium tetraurelia;Paramecium tetraurelia strain d4-2;
6.91	215	Minc06258	-	-	2e-30	-	-	-	-	2e-27	470292779	33.63	Capsa	Capsaspora owczarzaki ATCC 30864	@Eukaryota	595528	;cellular organisms;Eukaryota;Opisthokonta;Opisthokonta incertae sedis;Ichthyosporea;Capsaspora;Capsaspora owczarzaki;Capsaspora owczarzaki ATCC 30864;
6.91	250	Minc05066	-	1e-22	-	-	-	-	-	1e-19	517438996	37.41	U_gan	Uliginosibacterium gangwonense	@Bacteria	392736	;cellular organisms;Bacteria;Proteobacteria;Betaproteobacteria;Rhodocyclales;Zoogloeaceae;Uliginosibacterium;Uliginosibacterium gangwonense;
6.91	250	Minc01581	-	-	2e-09	-	-	2e-09	-	2e-06	224120262	34.38	P_tri	Populus trichocarpa	@Eukaryota@Viridiplantae	3694	;cellular organisms;Eukaryota;Viridiplantae;Streptophyta;Streptophytina;Embryophyta;Tracheophyta;Euphyllophyta;Spermatophyta;Magnoliophyta;Mesangiospermae;eudicotyledons;Gunneridae;Pentapetalae;rosids;fabids;Malpighiales;Salicaceae;Saliceae;Populus;Populus trichocarpa;
6.91	250	Minc02477	-	-	4e-11	-	-	-	4e-11	4e-08	324975487	27.82	C_met	Candida metapsilosis	@Eukaryota@Fungi	273372	;cellular organisms;Eukaryota;Opisthokonta;Fungi;Dikarya;Ascomycota;saccharomyceta;Saccharomycotina;Saccharomycetes;Saccharomycetales;Debaryomycetaceae;Candida/Lodderomyces clade;Candida;Candida metapsilosis;
6.91	51	Minc03384	-	-	1e-07	-	-	-	-	0.0001	546297396	52	C_cri	Chondrus crispus	@Eukaryota	2769	;cellular organisms;Eukaryota;Rhodophyta;Florideophyceae;Gigartinales;Gigartinaceae;Chondrus;Chondrus crispus;
6.8	250	Minc18958	-	-	1e-08	-	-	1e-08	-	9e-06	604330707	26.19	E_gut	Erythranthe guttata	@Eukaryota@Viridiplantae	4155	;cellular organisms;Eukaryota;Viridiplantae;Streptophyta;Streptophytina;Embryophyta;Tracheophyta;Euphyllophyta;Spermatophyta;Magnoliophyta;Mesangiospermae;eudicotyledons;Gunneridae;Pentapetalae;asterids;lamiids;Lamiales;Phrymaceae;Erythranthe;Erythranthe guttata;
6.8	250	Minc09998	-	-	1e-83	-	-	-	-	9e-81	523577288	35.55	Toxop	Toxoplasma gondii GT1	@Eukaryota	507601	;cellular organisms;Eukaryota;Alveolata;Apicomplexa;Conoidasida;Coccidia;Eucoccidiorida;Eimeriorina;Sarcocystidae;Toxoplasma;Toxoplasma gondii;Toxoplasma gondii GT1;
6.79	500	Minc16667b	-	-	9e-13	-	-	-	-	8e-10	281208685	52.63	Polys	Polysphondylium pallidum PN500	@Eukaryota	670386	;cellular organisms;Eukaryota;Amoebozoa;Mycetozoa;Dictyosteliida;Polysphondylium;Polysphondylium pallidum;Polysphondylium pallidum PN500;
6.68	250	Minc04132	-	-	5e-13	-	-	-	-	4e-10	551668601	38.14	Guill	Guillardia theta CCMP2712	@Eukaryota	905079	;cellular organisms;Eukaryota;Cryptophyta;Pyrenomonadales;Geminigeraceae;Guillardia;Guillardia theta;Guillardia theta CCMP2712;
6.62	250	Minc15644	-	-	4e-23	-	-	-	4e-23	3e-20	588254826	57.47	Walle	Wallemia mellicola CBS 633.66	@Eukaryota@Fungi	671144	;cellular organisms;Eukaryota;Opisthokonta;Fungi;Dikarya;Basidiomycota;Agaricomycotina;Wallemiomycetes;Wallemiales;Wallemiales incertae sedis;Wallemia;Wallemia mellicola;Wallemia mellicola CBS 633.66;
6.44	250	Minc09717	-	-	8e-10	-	-	-	-	5e-07	342183215	50	Trypa	Trypanosoma congolense IL3000	@Eukaryota	1068625	;cellular organisms;Eukaryota;Euglenozoa;Kinetoplastida;Trypanosomatidae;Trypanosoma;Nannomonas;Trypanosoma congolense;Trypanosoma congolense IL3000;
6.4	250	Minc09218	-	-	1e-75	-	-	-	1e-75	6e-73	296424758	41.18	Tuber	Tuber melanosporum Mel28	@Eukaryota@Fungi	656061	;cellular organisms;Eukaryota;Opisthokonta;Fungi;Dikarya;Ascomycota;saccharomyceta;Pezizomycotina;Pezizomycetes;Pezizales;Tuberaceae;Tuber;Tuber melanosporum;Tuber melanosporum Mel28;
6.21	25	Minc11610	-	-	2e-10	-	-	-	2e-10	1e-07	599112444	29.19	Punct	Punctularia strigosozonata HHB-11173 SS5	@Eukaryota@Fungi	741275	;cellular organisms;Eukaryota;Opisthokonta;Fungi;Dikarya;Basidiomycota;Agaricomycotina;Agaricomycetes;Agaricomycetes incertae sedis;Corticiales;Punctulariaceae;Punctularia;Punctularia strigosozonata;Punctularia strigosozonata HHB-11173 SS5;
6.21	250	Minc06208	-	-	4e-11	-	-	-	-	2e-08	123428533	22.66	Trich	Trichomonas vaginalis G3	@Eukaryota	412133	;cellular organisms;Eukaryota;Parabasalia;Trichomonadida;Trichomonadidae;Trichomonas;Trichomonas vaginalis;Trichomonas vaginalis G3;
6.21	250	Minc13906	-	-	2e-12	-	-	-	-	1e-09	123406065	26.06	Trich	Trichomonas vaginalis G3	@Eukaryota	412133	;cellular organisms;Eukaryota;Parabasalia;Trichomonadida;Trichomonadidae;Trichomonas;Trichomonas vaginalis;Trichomonas vaginalis G3;
6.21	36	Minc06256	-	-	2e-10	-	-	-	-	1e-07	330802675	29.11	D_pur	Dictyostelium purpureum	@Eukaryota	5786	;cellular organisms;Eukaryota;Amoebozoa;Mycetozoa;Dictyosteliida;Dictyostelium;Dictyostelium purpureum;
6.21	16	Minc11767	-	-	8e-08	-	-	-	-	4e-05	641523093	29.27	Sapro	Saprolegnia parasitica CBS 223.65	@Eukaryota	695850	;cellular organisms;Eukaryota;Stramenopiles;Oomycetes;Saprolegniales;Saprolegniaceae;Saprolegnia;Saprolegnia parasitica;Saprolegnia parasitica CBS 223.65;
6.11	253	Minc18094	-	-	2e-10	-	-	2e-10	-	9e-08	545373924	30.05	Cocco	Coccomyxa subellipsoidea C-169	@Eukaryota@Viridiplantae	574566	;cellular organisms;Eukaryota;Viridiplantae;Chlorophyta;Trebouxiophyceae;Trebouxiophyceae incertae sedis;Coccomyxaceae;Coccomyxa;Coccomyxa subellipsoidea;Coccomyxa subellipsoidea C-169;
6.1	300	Minc07646	-	-	9e-114	-	-	9e-114	-	4e-111	56784556	27	Oryza	Oryza sativa Japonica Group	@Eukaryota@Viridiplantae	39947	;cellular organisms;Eukaryota;Viridiplantae;Streptophyta;Streptophytina;Embryophyta;Tracheophyta;Euphyllophyta;Spermatophyta;Magnoliophyta;Mesangiospermae;Liliopsida;Petrosaviidae;commelinids;Poales;Poaceae;BOP clade;Oryzoideae;Oryzeae;Oryzinae;Oryza;Oryza sativa;Oryza sativa Japonica Group;
6.06	250	Minc04665	-	7e-26	-	-	-	-	-	3e-23	504049332	47.22	Pseud	Pseudovibrio sp. FO-BEG1	@Bacteria	911045	;cellular organisms;Bacteria;Proteobacteria;Alphaproteobacteria;Rhodobacterales;Rhodobacteraceae;Pseudovibrio;Pseudovibrio sp. FO-BEG1;
6.06	250	Minc13780	-	-	7e-23	-	-	-	-	3e-20	407039213	25.56	Entam	Entamoeba nuttalli P19	@Eukaryota	1076696	;cellular organisms;Eukaryota;Amoebozoa;Archamoebae;Entamoebidae;Entamoeba;Entamoeba nuttalli;Entamoeba nuttalli P19;
5.99	278	Minc10905	-	-	5e-13	-	-	-	5e-13	2e-10	627806701	41.53	Baudo	Baudoinia panamericana UAMH 10762	@Eukaryota@Fungi	717646	;cellular organisms;Eukaryota;Opisthokonta;Fungi;Dikarya;Ascomycota;saccharomyceta;Pezizomycotina;leotiomyceta;dothideomyceta;Dothideomycetes;Dothideomycetidae;Capnodiales;Teratosphaeriaceae;Baudoinia;Baudoinia panamericana;Baudoinia panamericana UAMH 10762;
5.93	250	Minc12664	-	-	8e-13	-	-	-	-	3e-10	403352274	29.88	O_tri	Oxytricha trifallax	@Eukaryota	1172189	;cellular organisms;Eukaryota;Alveolata;Ciliophora;Intramacronucleata;Spirotrichea;Stichotrichia;Sporadotrichida;Oxytrichidae;Oxytrichinae;Oxytricha;Oxytricha trifallax;
5.86	250	Minc18603	-	-	2e-36	-	-	2e-36	-	7e-34	145347961	38.19	Ostre	Ostreococcus lucimarinus CCE9901	@Eukaryota@Viridiplantae	436017	;cellular organisms;Eukaryota;Viridiplantae;Chlorophyta;prasinophytes;Mamiellophyceae;Mamiellales;Bathycoccaceae;Ostreococcus;Ostreococcus 'lucimarinus';Ostreococcus lucimarinus CCE9901;
5.81	429	Minc04452	-	-	3e-74	-	-	-	3e-74	1e-71	406695195	44.57	Trich	Trichosporon asahii var. asahii CBS 8904	@Eukaryota@Fungi	1220162	;cellular organisms;Eukaryota;Opisthokonta;Fungi;Dikarya;Basidiomycota;Agaricomycotina;Tremellomycetes;Trichosporonales;Trichosporonaceae;Trichosporon;Trichosporon asahii;Trichosporon asahii var. asahii;Trichosporon asahii var. asahii CBS 8904;
5.81	251	Minc15832	-	-	6e-10	-	-	6e-10	-	2e-07	125524889	39.39	Oryza	Oryza sativa Indica Group	@Eukaryota@Viridiplantae	39946	;cellular organisms;Eukaryota;Viridiplantae;Streptophyta;Streptophytina;Embryophyta;Tracheophyta;Euphyllophyta;Spermatophyta;Magnoliophyta;Mesangiospermae;Liliopsida;Petrosaviidae;commelinids;Poales;Poaceae;BOP clade;Oryzoideae;Oryzeae;Oryzinae;Oryza;Oryza sativa;Oryza sativa Indica Group;
5.81	251	Minc16922	-	-	3e-08	-	-	-	-	1e-05	527315506	32.05	Toxop	Toxoplasma gondii ME49	@Eukaryota	508771	;cellular organisms;Eukaryota;Alveolata;Apicomplexa;Conoidasida;Coccidia;Eucoccidiorida;Eimeriorina;Sarcocystidae;Toxoplasma;Toxoplasma gondii;Toxoplasma gondii ME49;
5.81	23	Minc08363	-	-	3e-10	-	-	-	3e-10	1e-07	599112444	29.19	Punct	Punctularia strigosozonata HHB-11173 SS5	@Eukaryota@Fungi	741275	;cellular organisms;Eukaryota;Opisthokonta;Fungi;Dikarya;Basidiomycota;Agaricomycotina;Agaricomycetes;Agaricomycetes incertae sedis;Corticiales;Punctulariaceae;Punctularia;Punctularia strigosozonata;Punctularia strigosozonata HHB-11173 SS5;
5.81	304	Minc06255	-	-	6e-24	-	-	-	-	2e-21	470500809	27.68	Acant	Acanthamoeba castellanii str. Neff	@Eukaryota	1257118	;cellular organisms;Eukaryota;Amoebozoa;Discosea;Longamoebia;Centramoebida;Acanthamoebidae;Acanthamoeba;Acanthamoeba castellanii;Acanthamoeba castellanii str. Neff;
5.81	250	Minc13142	-	-	6e-19	-	-	-	6e-19	2e-16	630916022	47.73	Annca	Anncaliia algerae PRA109	@Eukaryota@Fungi	1240240	;cellular organisms;Eukaryota;Opisthokonta;Fungi;Microsporidia;Apansporoblastina;Tubulinosematidae;Anncaliia;Anncaliia algerae;Anncaliia algerae PRA109;
5.81	47	Minc02907	-	-	-	-	3e-08	-	-	1e-05	311978014	47.06	Acant	Acanthamoeba polyphaga mimivirus	@Viruses	212035	;Viruses;dsDNA viruses, no RNA stage;Mimiviridae;Mimivirus;Acanthamoeba polyphaga mimivirus;
5.7	158	Minc17666	-	-	3e-09	-	-	-	3e-09	9e-07	528315245	39.36	Schiz	Schizosaccharomyces cryophilus OY26	@Eukaryota@Fungi	653667	;cellular organisms;Eukaryota;Opisthokonta;Fungi;Dikarya;Ascomycota;Taphrinomycotina;Schizosaccharomycetes;Schizosaccharomycetales;Schizosaccharomycetaceae;Schizosaccharomyces;Schizosaccharomyces cryophilus;Schizosaccharomyces cryophilus OY26;
5.7	4	Minc10754	-	-	1e-06	-	-	-	1e-06	0.0003	636596211	37.78	Setos	Setosphaeria turcica Et28A	@Eukaryota@Fungi	671987	;cellular organisms;Eukaryota;Opisthokonta;Fungi;Dikarya;Ascomycota;saccharomyceta;Pezizomycotina;leotiomyceta;dothideomyceta;Dothideomycetes;Pleosporomycetidae;Pleosporales;Pleosporineae;Pleosporaceae;Setosphaeria;Setosphaeria turcica;Setosphaeria turcica Et28A;
5.7	34	Minc08081	-	-	1e-07	-	-	-	-	3e-05	586728025	27.84	Tetra	Tetrahymena thermophila SB210	@Eukaryota	312017	;cellular organisms;Eukaryota;Alveolata;Ciliophora;Intramacronucleata;Oligohymenophorea;Hymenostomatida;Tetrahymenina;Tetrahymenidae;Tetrahymena;Tetrahymena thermophila;Tetrahymena thermophila SB210;
5.59	474	Minc09276	3e-10	-	-	-	-	-	-	8e-08	14423938	50	P_occ	Pyrodictium occultum	@Archaea	2309	;cellular organisms;Archaea;TACK group;Crenarchaeota;Thermoprotei;Desulfurococcales;Pyrodictiaceae;Pyrodictium;Pyrodictium occultum;
5.52	385	Minc00994	-	-	8e-10	-	-	-	-	2e-07	123455890	33.86	Trich	Trichomonas vaginalis G3	@Eukaryota	412133	;cellular organisms;Eukaryota;Parabasalia;Trichomonadida;Trichomonadidae;Trichomonas;Trichomonas vaginalis;Trichomonas vaginalis G3;
5.52	175	Minc12831	-	-	4e-07	-	-	-	4e-07	0.0001	302675344	54.72	Schiz	Schizophyllum commune H4-8	@Eukaryota@Fungi	578458	;cellular organisms;Eukaryota;Opisthokonta;Fungi;Dikarya;Basidiomycota;Agaricomycotina;Agaricomycetes;Agaricomycetidae;Agaricales;Schizophyllaceae;Schizophyllum;Schizophyllum commune;Schizophyllum commune H4-8;
5.52	121	Minc19209	-	-	4e-10	-	-	-	4e-10	1e-07	595434905	49.09	Rhizo	Rhizophagus irregularis DAOM 197198w	@Eukaryota@Fungi	1432141	;cellular organisms;Eukaryota;Opisthokonta;Fungi;Mucoromycota;Glomeromycotina;Glomeromycetes;Glomerales;Glomeraceae;Rhizophagus;Rhizophagus irregularis;Rhizophagus irregularis DAOM 197198w;
5.45	250	Minc08411	-	-	3e-16	-	-	-	3e-16	7e-14	302506088	32.69	Trich	Trichophyton benhamiae CBS 112371	@Eukaryota@Fungi	663331	;cellular organisms;Eukaryota;Opisthokonta;Fungi;Dikarya;Ascomycota;saccharomyceta;Pezizomycotina;leotiomyceta;Eurotiomycetes;Eurotiomycetidae;Onygenales;Arthrodermataceae;Trichophyton;Trichophyton benhamiae;Trichophyton benhamiae CBS 112371;
5.4	139	Minc05581	-	-	9e-07	-	-	-	9e-07	0.0002	595436495	33.63	Rhizo	Rhizophagus irregularis DAOM 197198w	@Eukaryota@Fungi	1432141	;cellular organisms;Eukaryota;Opisthokonta;Fungi;Mucoromycota;Glomeromycotina;Glomeromycetes;Glomerales;Glomeraceae;Rhizophagus;Rhizophagus irregularis;Rhizophagus irregularis DAOM 197198w;
5.3	30	Minc08144	-	-	5e-07	-	-	-	-	0.0001	471224294	28	I_mul	Ichthyophthirius multifiliis	@Eukaryota	5932	;cellular organisms;Eukaryota;Alveolata;Ciliophora;Intramacronucleata;Oligohymenophorea;Hymenostomatida;Ophryoglenina;Ichthyophthirius;Ichthyophthirius multifiliis;
5.3	84	Minc16434	-	-	1e-15	-	-	-	1e-15	2e-13	552937489	23.19	Rhizo	Rhizophagus irregularis DAOM 181602	@Eukaryota@Fungi	747089	;cellular organisms;Eukaryota;Opisthokonta;Fungi;Mucoromycota;Glomeromycotina;Glomeromycetes;Glomerales;Glomeraceae;Rhizophagus;Rhizophagus irregularis;Rhizophagus irregularis DAOM 181602;
5.3	48	Minc17361	-	-	3e-08	-	-	-	3e-08	6e-06	595441180	39.58	Rhizo	Rhizophagus irregularis DAOM 197198w	@Eukaryota@Fungi	1432141	;cellular organisms;Eukaryota;Opisthokonta;Fungi;Mucoromycota;Glomeromycotina;Glomeromycetes;Glomerales;Glomeraceae;Rhizophagus;Rhizophagus irregularis;Rhizophagus irregularis DAOM 197198w;
5.3	250	Minc18407	-	3e-11	-	-	-	-	-	6e-09	499566766	55.93	Bacil	Bacillus	@Bacteria	1386	;cellular organisms;Bacteria;Terrabacteria group;Firmicutes;Bacilli;Bacillales;Bacillaceae;Bacillus;
5.3	9	Minc16923	-	-	2e-06	-	-	2e-06	-	0.0004	567168383	39.13	E_sal	Eutrema salsugineum	@Eukaryota@Viridiplantae	72664	;cellular organisms;Eukaryota;Viridiplantae;Streptophyta;Streptophytina;Embryophyta;Tracheophyta;Euphyllophyta;Spermatophyta;Magnoliophyta;Mesangiospermae;eudicotyledons;Gunneridae;Pentapetalae;rosids;malvids;Brassicales;Brassicaceae;Eutremeae;Eutrema;Eutrema salsugineum;
5.3	250	Minc07485	-	-	1e-15	-	-	-	-	2e-13	566012495	38.46	Phyto	Phytophthora parasitica P1569	@Eukaryota	1317065	;cellular organisms;Eukaryota;Stramenopiles;Oomycetes;Peronosporales;Phytophthora;Phytophthora parasitica;Phytophthora parasitica P1569;
5.3	250	Minc12283	-	5e-19	-	-	-	-	-	1e-16	502639151	28.41	T_ter	Thermobaculum terrenum	@Bacteria	166501	;cellular organisms;Bacteria;Terrabacteria group;unclassified Terrabacteria group;Thermobaculum;Thermobaculum terrenum;
5.3	250	Minc09466	-	-	1e-35	-	-	-	-	2e-33	449702259	38.16	Entam	Entamoeba histolytica KU27	@Eukaryota	885311	;cellular organisms;Eukaryota;Amoebozoa;Archamoebae;Entamoebidae;Entamoeba;Entamoeba histolytica;Entamoeba histolytica KU27;
5.3	250	Minc07826b	-	-	2e-37	-	-	2e-37	-	4e-35	108862722	52.34	Oryza	Oryza sativa Japonica Group	@Eukaryota@Viridiplantae	39947	;cellular organisms;Eukaryota;Viridiplantae;Streptophyta;Streptophytina;Embryophyta;Tracheophyta;Euphyllophyta;Spermatophyta;Magnoliophyta;Mesangiospermae;Liliopsida;Petrosaviidae;commelinids;Poales;Poaceae;BOP clade;Oryzoideae;Oryzeae;Oryzinae;Oryza;Oryza sativa;Oryza sativa Japonica Group;
5.16	48	Minc00250	-	-	4e-07	-	-	-	4e-07	7e-05	408384431	40.62	Polyp	Polyporales sp. KUC9061	@Eukaryota@Fungi	1239933	;cellular organisms;Eukaryota;Opisthokonta;Fungi;Dikarya;Basidiomycota;Agaricomycotina;Agaricomycetes;Agaricomycetes incertae sedis;Polyporales;unclassified Polyporales;Polyporales sp. KUC9061;
5.16	250	Minc10405	-	4e-37	-	-	-	-	-	7e-35	517155055	30.89	C_aur	Cytophaga aurantiaca	@Bacteria	29530	;cellular organisms;Bacteria;FCB group;Bacteroidetes/Chlorobi group;Bacteroidetes;Cytophagia;Cytophagales;Cytophagaceae;Cytophaga;Cytophaga aurantiaca;
5.08	4	Minc10401	-	-	5e-06	-	-	-	5e-06	0.0008	528315245	33.98	Schiz	Schizosaccharomyces cryophilus OY26	@Eukaryota@Fungi	653667	;cellular organisms;Eukaryota;Opisthokonta;Fungi;Dikarya;Ascomycota;Taphrinomycotina;Schizosaccharomycetes;Schizosaccharomycetales;Schizosaccharomycetaceae;Schizosaccharomyces;Schizosaccharomyces cryophilus;Schizosaccharomyces cryophilus OY26;
5.01	250	Minc08115	-	-	2e-09	-	-	2e-09	-	3e-07	566198377	24.49	P_tri	Populus trichocarpa	@Eukaryota@Viridiplantae	3694	;cellular organisms;Eukaryota;Viridiplantae;Streptophyta;Streptophytina;Embryophyta;Tracheophyta;Euphyllophyta;Spermatophyta;Magnoliophyta;Mesangiospermae;eudicotyledons;Gunneridae;Pentapetalae;rosids;fabids;Malpighiales;Salicaceae;Saliceae;Populus;Populus trichocarpa;
5.01	76	Minc18566	-	-	4e-09	-	-	4e-09	-	6e-07	77550797	43.28	Oryza	Oryza sativa Japonica Group	@Eukaryota@Viridiplantae	39947	;cellular organisms;Eukaryota;Viridiplantae;Streptophyta;Streptophytina;Embryophyta;Tracheophyta;Euphyllophyta;Spermatophyta;Magnoliophyta;Mesangiospermae;Liliopsida;Petrosaviidae;commelinids;Poales;Poaceae;BOP clade;Oryzoideae;Oryzeae;Oryzinae;Oryza;Oryza sativa;Oryza sativa Japonica Group;
4.96	250	Minc15708	-	-	7e-55	-	-	7e-55	-	1e-52	388518205	49.28	M_tru	Medicago truncatula	@Eukaryota@Viridiplantae	3880	;cellular organisms;Eukaryota;Viridiplantae;Streptophyta;Streptophytina;Embryophyta;Tracheophyta;Euphyllophyta;Spermatophyta;Magnoliophyta;Mesangiospermae;eudicotyledons;Gunneridae;Pentapetalae;rosids;fabids;Fabales;Fabaceae;Papilionoideae;Trifolieae;Medicago;Medicago truncatula;
4.86	250	Minc09221	-	-	7e-28	-	-	-	7e-28	9e-26	170097912	59	Lacca	Laccaria bicolor S238N-H82	@Eukaryota@Fungi	486041	;cellular organisms;Eukaryota;Opisthokonta;Fungi;Dikarya;Basidiomycota;Agaricomycotina;Agaricomycetes;Agaricomycetidae;Agaricales;Tricholomataceae;Laccaria;Laccaria bicolor;Laccaria bicolor S238N-H82;
4.83	193	Minc14316	-	-	-	-	8e-11	-	-	1e-08	589286675	38.16	Staph	Staphylococcus phage phiSA12	@Viruses	1450142	;Viruses;dsDNA viruses, no RNA stage;Caudovirales;Myoviridae;Spounavirinae;Kayvirus;Staphylococcus virus SA12;Staphylococcus phage phiSA12;
4.83	11	Minc16313	-	-	8e-07	-	-	-	8e-07	0.0001	595465258	30.41	Rhizo	Rhizophagus irregularis DAOM 197198w	@Eukaryota@Fungi	1432141	;cellular organisms;Eukaryota;Opisthokonta;Fungi;Mucoromycota;Glomeromycotina;Glomeromycetes;Glomerales;Glomeraceae;Rhizophagus;Rhizophagus irregularis;Rhizophagus irregularis DAOM 197198w;
4.83	251	Minc12928	-	-	4e-10	-	-	4e-10	-	5e-08	566207624	31.78	P_tri	Populus trichocarpa	@Eukaryota@Viridiplantae	3694	;cellular organisms;Eukaryota;Viridiplantae;Streptophyta;Streptophytina;Embryophyta;Tracheophyta;Euphyllophyta;Spermatophyta;Magnoliophyta;Mesangiospermae;eudicotyledons;Gunneridae;Pentapetalae;rosids;fabids;Malpighiales;Salicaceae;Saliceae;Populus;Populus trichocarpa;
4.76	250	Minc11512	-	-	6e-55	-	-	6e-55	-	7e-53	388518205	49.52	M_tru	Medicago truncatula	@Eukaryota@Viridiplantae	3880	;cellular organisms;Eukaryota;Viridiplantae;Streptophyta;Streptophytina;Embryophyta;Tracheophyta;Euphyllophyta;Spermatophyta;Magnoliophyta;Mesangiospermae;eudicotyledons;Gunneridae;Pentapetalae;rosids;fabids;Fabales;Fabaceae;Papilionoideae;Trifolieae;Medicago;Medicago truncatula;
4.71	250	Minc01430	-	-	9e-14	-	-	-	9e-14	1e-11	630341833	36.23	Gloeo	Gloeophyllum trabeum ATCC 11539	@Eukaryota@Fungi	670483	;cellular organisms;Eukaryota;Opisthokonta;Fungi;Dikarya;Basidiomycota;Agaricomycotina;Agaricomycetes;Agaricomycetes incertae sedis;Gloeophyllales;Gloeophyllaceae;Gloeophyllum;Gloeophyllum trabeum;Gloeophyllum trabeum ATCC 11539;
4.61	178	Minc02728	-	-	3e-13	-	-	-	3e-13	3e-11	648151009	27.31	Galer	Galerina marginata CBS 339.88	@Eukaryota@Fungi	685588	;cellular organisms;Eukaryota;Opisthokonta;Fungi;Dikarya;Basidiomycota;Agaricomycotina;Agaricomycetes;Agaricomycetidae;Agaricales;Strophariaceae;Galerina;Galerina marginata;Galerina marginata CBS 339.88;
4.61	250	Minc16189	-	2e-36	-	-	-	-	-	2e-34	504603951	61.17	O_rhi	Ornithobacterium rhinotracheale	@Bacteria	28251	;cellular organisms;Bacteria;FCB group;Bacteroidetes/Chlorobi group;Bacteroidetes;Flavobacteriia;Flavobacteriales;Flavobacteriaceae;Ornithobacterium;Ornithobacterium rhinotracheale;
4.61	250	Minc09375	-	-	4e-32	-	-	4e-32	-	4e-30	224145184	64.84	P_tri	Populus trichocarpa	@Eukaryota@Viridiplantae	3694	;cellular organisms;Eukaryota;Viridiplantae;Streptophyta;Streptophytina;Embryophyta;Tracheophyta;Euphyllophyta;Spermatophyta;Magnoliophyta;Mesangiospermae;eudicotyledons;Gunneridae;Pentapetalae;rosids;fabids;Malpighiales;Salicaceae;Saliceae;Populus;Populus trichocarpa;
4.61	164	Minc02398	-	-	3e-13	-	-	3e-13	-	3e-11	218200559	27.32	Oryza	Oryza sativa Indica Group	@Eukaryota@Viridiplantae	39946	;cellular organisms;Eukaryota;Viridiplantae;Streptophyta;Streptophytina;Embryophyta;Tracheophyta;Euphyllophyta;Spermatophyta;Magnoliophyta;Mesangiospermae;Liliopsida;Petrosaviidae;commelinids;Poales;Poaceae;BOP clade;Oryzoideae;Oryzeae;Oryzinae;Oryza;Oryza sativa;Oryza sativa Indica Group;
4.61	6	Minc18786	-	2e-06	-	-	-	-	-	0.0002	491669402	54.89	C_mat	Corynebacterium matruchotii	@Bacteria	43768	;cellular organisms;Bacteria;Terrabacteria group;Actinobacteria;Actinobacteria;Corynebacteriales;Corynebacteriaceae;Corynebacterium;Corynebacterium matruchotii;
4.61	251	Minc07884	-	-	2e-27	-	-	-	2e-27	2e-25	639575975	63.64	Tille	Tilletiaria anomala UBC 951	@Eukaryota@Fungi	1037660	;cellular organisms;Eukaryota;Opisthokonta;Fungi;Dikarya;Basidiomycota;Ustilaginomycotina;Exobasidiomycetes;Georgefischeriales;Tilletiariaceae;Tilletiaria;Tilletiaria anomala;Tilletiaria anomala UBC 951;
4.61	251	Minc09199	-	-	2e-11	-	-	-	2e-11	2e-09	595447428	43.48	Rhizo	Rhizophagus irregularis DAOM 197198w	@Eukaryota@Fungi	1432141	;cellular organisms;Eukaryota;Opisthokonta;Fungi;Mucoromycota;Glomeromycotina;Glomeromycetes;Glomerales;Glomeraceae;Rhizophagus;Rhizophagus irregularis;Rhizophagus irregularis DAOM 197198w;
4.61	54	Minc16606	-	-	3e-06	-	-	-	-	0.0003	471200780	29.71	Entam	Entamoeba invadens IP1	@Eukaryota	370355	;cellular organisms;Eukaryota;Amoebozoa;Archamoebae;Entamoebidae;Entamoeba;Entamoeba invadens;Entamoeba invadens IP1;
4.61	250	Minc07651	-	-	2e-22	-	-	2e-22	-	2e-20	242051190	34.54	S_bic	Sorghum bicolor	@Eukaryota@Viridiplantae	4558	;cellular organisms;Eukaryota;Viridiplantae;Streptophyta;Streptophytina;Embryophyta;Tracheophyta;Euphyllophyta;Spermatophyta;Magnoliophyta;Mesangiospermae;Liliopsida;Petrosaviidae;commelinids;Poales;Poaceae;PACMAD clade;Panicoideae;Andropogonodae;Andropogoneae;Sorghinae;Sorghum;Sorghum bicolor;
4.5	250	Minc02579	-	-	1e-07	-	-	1e-07	-	9e-06	587932986	46.3	M_not	Morus notabilis	@Eukaryota@Viridiplantae	981085	;cellular organisms;Eukaryota;Viridiplantae;Streptophyta;Streptophytina;Embryophyta;Tracheophyta;Euphyllophyta;Spermatophyta;Magnoliophyta;Mesangiospermae;eudicotyledons;Gunneridae;Pentapetalae;rosids;fabids;Rosales;Moraceae;Morus;Morus notabilis;
4.45	404	Minc02445	-	-	7e-09	-	-	-	-	6e-07	123429669	38.27	Trich	Trichomonas vaginalis G3	@Eukaryota	412133	;cellular organisms;Eukaryota;Parabasalia;Trichomonadida;Trichomonadidae;Trichomonas;Trichomonas vaginalis;Trichomonas vaginalis G3;
4.38	8	Minc13943	-	-	5e-06	-	-	5e-06	-	0.0004	308808540	27.1	O_tau	Ostreococcus tauri	@Eukaryota@Viridiplantae	70448	;cellular organisms;Eukaryota;Viridiplantae;Chlorophyta;prasinophytes;Mamiellophyceae;Mamiellales;Bathycoccaceae;Ostreococcus;Ostreococcus tauri;
4.38	250	Minc02455	-	-	1e-17	-	-	1e-17	-	8e-16	147811720	41.62	V_vin	Vitis vinifera	@Eukaryota@Viridiplantae	29760	;cellular organisms;Eukaryota;Viridiplantae;Streptophyta;Streptophytina;Embryophyta;Tracheophyta;Euphyllophyta;Spermatophyta;Magnoliophyta;Mesangiospermae;eudicotyledons;Gunneridae;Pentapetalae;rosids;rosids incertae sedis;Vitales;Vitaceae;Vitis;Vitis vinifera;
4.2	250	Minc05533	-	-	6e-22	-	-	-	-	4e-20	471195568	27.16	Entam	Entamoeba invadens IP1	@Eukaryota	370355	;cellular organisms;Eukaryota;Amoebozoa;Archamoebae;Entamoebidae;Entamoeba;Entamoeba invadens;Entamoeba invadens IP1;
4.2	250	Minc10595	-	9e-26	-	-	-	-	-	6e-24	550941180	36.52	Sphin	Sphingomonas-like bacterium B12	@Bacteria	95606	;cellular organisms;Bacteria;Proteobacteria;Alphaproteobacteria;Sphingomonadales;Sphingomonadaceae;unclassified Sphingomonadaceae;unclassified Sphingomonadaceae (miscellaneous);Sphingomonas-like bacterium B12;
4.2	6	Minc02684	-	3e-06	-	-	-	-	-	0.0002	491669402	52.76	C_mat	Corynebacterium matruchotii	@Bacteria	43768	;cellular organisms;Bacteria;Terrabacteria group;Actinobacteria;Actinobacteria;Corynebacteriales;Corynebacteriaceae;Corynebacterium;Corynebacterium matruchotii;
4.09	101	Minc13905	-	-	5e-06	-	-	5e-06	-	0.0003	593265368	25.25	P_vul	Phaseolus vulgaris	@Eukaryota@Viridiplantae	3885	;cellular organisms;Eukaryota;Viridiplantae;Streptophyta;Streptophytina;Embryophyta;Tracheophyta;Euphyllophyta;Spermatophyta;Magnoliophyta;Mesangiospermae;eudicotyledons;Gunneridae;Pentapetalae;rosids;fabids;Fabales;Fabaceae;Papilionoideae;Phaseoleae;Phaseolus;Phaseolus vulgaris;
3.91	245	Minc09190	-	-	2e-07	-	-	-	-	1e-05	237837577	46.81	Toxop	Toxoplasma gondii ME49	@Eukaryota	508771	;cellular organisms;Eukaryota;Alveolata;Apicomplexa;Conoidasida;Coccidia;Eucoccidiorida;Eimeriorina;Sarcocystidae;Toxoplasma;Toxoplasma gondii;Toxoplasma gondii ME49;
3.91	250	Minc00135	-	8e-13	-	-	-	-	-	4e-11	517841061	44.09	D_aqu	Deinococcus aquatilis	@Bacteria	519440	;cellular organisms;Bacteria;Terrabacteria group;Deinococcus-Thermus;Deinococci;Deinococcales;Deinococcaceae;Deinococcus;Deinococcus aquatilis;
3.91	8	Minc02733	-	-	1e-06	-	-	-	-	5e-05	641534806	41.07	Sapro	Saprolegnia parasitica CBS 223.65	@Eukaryota	695850	;cellular organisms;Eukaryota;Stramenopiles;Oomycetes;Saprolegniales;Saprolegniaceae;Saprolegnia;Saprolegnia parasitica;Saprolegnia parasitica CBS 223.65;
3.91	123	Minc10407	-	-	4e-07	-	-	4e-07	-	2e-05	302761000	27.2	S_moe	Selaginella moellendorffii	@Eukaryota@Viridiplantae	88036	;cellular organisms;Eukaryota;Viridiplantae;Streptophyta;Streptophytina;Embryophyta;Tracheophyta;Lycopodiopsida;Selaginellales;Selaginellaceae;Selaginella;Selaginella moellendorffii;
3.91	13	Minc04115	-	-	4e-06	-	-	-	4e-06	0.0002	242768097	32.18	Talar	Talaromyces stipitatus ATCC 10500	@Eukaryota@Fungi	441959	;cellular organisms;Eukaryota;Opisthokonta;Fungi;Dikarya;Ascomycota;saccharomyceta;Pezizomycotina;leotiomyceta;Eurotiomycetes;Eurotiomycetidae;Eurotiales;Trichocomaceae;Talaromyces;Talaromyces stipitatus;Talaromyces stipitatus ATCC 10500;
3.91	250	Minc13402	-	-	4e-09	-	-	-	4e-09	2e-07	646311650	25.29	Pleur	Pleurotus ostreatus PC15	@Eukaryota@Fungi	1137138	;cellular organisms;Eukaryota;Opisthokonta;Fungi;Dikarya;Basidiomycota;Agaricomycotina;Agaricomycetes;Agaricomycetidae;Agaricales;Pleurotaceae;Pleurotus;Pleurotus ostreatus;Pleurotus ostreatus PC15;
3.91	78	Minc17416	-	-	2e-10	-	-	-	2e-10	1e-08	528315245	39.02	Schiz	Schizosaccharomyces cryophilus OY26	@Eukaryota@Fungi	653667	;cellular organisms;Eukaryota;Opisthokonta;Fungi;Dikarya;Ascomycota;Taphrinomycotina;Schizosaccharomycetes;Schizosaccharomycetales;Schizosaccharomycetaceae;Schizosaccharomyces;Schizosaccharomyces cryophilus;Schizosaccharomyces cryophilus OY26;
3.91	39	Minc07047	-	-	2e-07	-	-	-	2e-07	1e-05	530774875	40.96	Schiz	Schizosaccharomyces japonicus yFS275	@Eukaryota@Fungi	402676	;cellular organisms;Eukaryota;Opisthokonta;Fungi;Dikarya;Ascomycota;Taphrinomycotina;Schizosaccharomycetes;Schizosaccharomycetales;Schizosaccharomycetaceae;Schizosaccharomyces;Schizosaccharomyces japonicus;Schizosaccharomyces japonicus yFS275;
3.76	55	Minc08728	-	-	7e-09	-	-	-	7e-09	3e-07	552940317	45.71	Rhizo	Rhizophagus irregularis DAOM 181602	@Eukaryota@Fungi	747089	;cellular organisms;Eukaryota;Opisthokonta;Fungi;Mucoromycota;Glomeromycotina;Glomeromycetes;Glomerales;Glomeraceae;Rhizophagus;Rhizophagus irregularis;Rhizophagus irregularis DAOM 181602;
3.69	48	Minc16944	-	-	5e-06	-	-	5e-06	-	0.0002	475546164	36.47	A_tau	Aegilops tauschii	@Eukaryota@Viridiplantae	37682	;cellular organisms;Eukaryota;Viridiplantae;Streptophyta;Streptophytina;Embryophyta;Tracheophyta;Euphyllophyta;Spermatophyta;Magnoliophyta;Mesangiospermae;Liliopsida;Petrosaviidae;commelinids;Poales;Poaceae;BOP clade;Pooideae;Triticodae;Triticeae;Triticinae;Aegilops;Aegilops tauschii;
3.69	205	Minc09889	-	-	2e-23	-	-	-	-	8e-22	330804381	30.2	D_pur	Dictyostelium purpureum	@Eukaryota	5786	;cellular organisms;Eukaryota;Amoebozoa;Mycetozoa;Dictyosteliida;Dictyostelium;Dictyostelium purpureum;
3.69	9	Minc08247	-	-	1e-05	-	-	-	1e-05	0.0004	50539634	43.75	T_mat	Tricholoma matsutake	@Eukaryota@Fungi	40145	;cellular organisms;Eukaryota;Opisthokonta;Fungi;Dikarya;Basidiomycota;Agaricomycotina;Agaricomycetes;Agaricomycetidae;Agaricales;Tricholomataceae;Tricholoma;Tricholoma matsutake;
3.69	18	Minc17637	-	2e-06	-	-	-	-	-	8e-05	575404489	35.62	Candi	Candidatus Entotheonella sp. TSY1	@Bacteria	1429438	;cellular organisms;Bacteria;Nitrospinae/Tectomicrobia group;Candidatus Tectomicrobia;Candidatus Entotheonella;Candidatus Entotheonella sp. TSY1;
3.62	161	Minc13197	-	-	8e-08	-	-	8e-08	-	3e-06	566159534	37.84	P_tri	Populus trichocarpa	@Eukaryota@Viridiplantae	3694	;cellular organisms;Eukaryota;Viridiplantae;Streptophyta;Streptophytina;Embryophyta;Tracheophyta;Euphyllophyta;Spermatophyta;Magnoliophyta;Mesangiospermae;eudicotyledons;Gunneridae;Pentapetalae;rosids;fabids;Malpighiales;Salicaceae;Saliceae;Populus;Populus trichocarpa;
3.51	101	Minc17604	-	-	3e-06	-	-	-	3e-06	0.0001	595486842	52.5	Rhizo	Rhizophagus irregularis DAOM 197198w	@Eukaryota@Fungi	1432141	;cellular organisms;Eukaryota;Opisthokonta;Fungi;Mucoromycota;Glomeromycotina;Glomeromycetes;Glomerales;Glomeraceae;Rhizophagus;Rhizophagus irregularis;Rhizophagus irregularis DAOM 197198w;
3.51	3	Minc16475	-	-	9e-06	-	-	-	9e-06	0.0003	595462569	30.14	Rhizo	Rhizophagus irregularis DAOM 197198w	@Eukaryota@Fungi	1432141	;cellular organisms;Eukaryota;Opisthokonta;Fungi;Mucoromycota;Glomeromycotina;Glomeromycetes;Glomerales;Glomeraceae;Rhizophagus;Rhizophagus irregularis;Rhizophagus irregularis DAOM 197198w;
3.51	293	Minc18103	-	-	3e-132	-	-	3e-132	-	1e-130	242072318	26.72	S_bic	Sorghum bicolor	@Eukaryota@Viridiplantae	4558	;cellular organisms;Eukaryota;Viridiplantae;Streptophyta;Streptophytina;Embryophyta;Tracheophyta;Euphyllophyta;Spermatophyta;Magnoliophyta;Mesangiospermae;Liliopsida;Petrosaviidae;commelinids;Poales;Poaceae;PACMAD clade;Panicoideae;Andropogonodae;Andropogoneae;Sorghinae;Sorghum;Sorghum bicolor;
3.51	40	Minc08845b	-	-	6e-10	-	-	-	-	2e-08	66821683	34.96	Dicty	Dictyostelium discoideum AX4	@Eukaryota	352472	;cellular organisms;Eukaryota;Amoebozoa;Mycetozoa;Dictyosteliida;Dictyostelium;Dictyostelium discoideum;Dictyostelium discoideum AX4;
3.4	250	Minc10330	-	1e-11	-	-	-	-	-	3e-10	489575006	30.83	C_per	Clostridium perfringens	@Bacteria	1502	;cellular organisms;Bacteria;Terrabacteria group;Firmicutes;Clostridia;Clostridiales;Clostridiaceae;Clostridium;Clostridium perfringens;
3.4	505	Minc06706b	-	-	1e-12	-	-	-	-	3e-11	281208685	52.63	Polys	Polysphondylium pallidum PN500	@Eukaryota	670386	;cellular organisms;Eukaryota;Amoebozoa;Mycetozoa;Dictyosteliida;Polysphondylium;Polysphondylium pallidum;Polysphondylium pallidum PN500;
3.4	3	Minc02750	-	-	2e-05	-	-	-	-	0.0006	146182859	32.21	Tetra	Tetrahymena thermophila SB210	@Eukaryota	312017	;cellular organisms;Eukaryota;Alveolata;Ciliophora;Intramacronucleata;Oligohymenophorea;Hymenostomatida;Tetrahymenina;Tetrahymenidae;Tetrahymena;Tetrahymena thermophila;Tetrahymena thermophila SB210;
3.4	250	Minc08784	-	-	1e-17	-	-	-	-	3e-16	290974053	44.19	Naegl	Naegleria gruberi strain NEG-M	@Eukaryota	744533	;cellular organisms;Eukaryota;Heterolobosea;Schizopyrenida;Vahlkampfiidae;Naegleria;Naegleria gruberi;Naegleria gruberi strain NEG-M;
3.4	250	Minc02456	-	-	1e-07	-	-	-	1e-07	3e-06	429241243	48.21	Schiz	Schizosaccharomyces pombe 972h-	@Eukaryota@Fungi	284812	;cellular organisms;Eukaryota;Opisthokonta;Fungi;Dikarya;Ascomycota;Taphrinomycotina;Schizosaccharomycetes;Schizosaccharomycetales;Schizosaccharomycetaceae;Schizosaccharomyces;Schizosaccharomyces pombe;Schizosaccharomyces pombe 972h-;
3.4	250	Minc02459	-	-	1e-07	-	-	-	1e-07	3e-06	429241243	48.21	Schiz	Schizosaccharomyces pombe 972h-	@Eukaryota@Fungi	284812	;cellular organisms;Eukaryota;Opisthokonta;Fungi;Dikarya;Ascomycota;Taphrinomycotina;Schizosaccharomycetes;Schizosaccharomycetales;Schizosaccharomycetaceae;Schizosaccharomyces;Schizosaccharomyces pombe;Schizosaccharomyces pombe 972h-;
3.4	2	Minc12476	-	2e-05	-	-	-	-	-	0.0006	491669402	52.76	C_mat	Corynebacterium matruchotii	@Bacteria	43768	;cellular organisms;Bacteria;Terrabacteria group;Actinobacteria;Actinobacteria;Corynebacteriales;Corynebacteriaceae;Corynebacterium;Corynebacterium matruchotii;
3.4	250	Minc00452	-	-	1e-41	-	-	1e-41	-	3e-40	302774344	31.96	S_moe	Selaginella moellendorffii	@Eukaryota@Viridiplantae	88036	;cellular organisms;Eukaryota;Viridiplantae;Streptophyta;Streptophytina;Embryophyta;Tracheophyta;Lycopodiopsida;Selaginellales;Selaginellaceae;Selaginella;Selaginella moellendorffii;
3.35	254	Minc02729	-	-	7e-35	-	-	7e-35	-	2e-33	242081471	28.57	S_bic	Sorghum bicolor	@Eukaryota@Viridiplantae	4558	;cellular organisms;Eukaryota;Viridiplantae;Streptophyta;Streptophytina;Embryophyta;Tracheophyta;Euphyllophyta;Spermatophyta;Magnoliophyta;Mesangiospermae;Liliopsida;Petrosaviidae;commelinids;Poales;Poaceae;PACMAD clade;Panicoideae;Andropogonodae;Andropogoneae;Sorghinae;Sorghum;Sorghum bicolor;
3.35	104	Minc12046	-	-	7e-09	-	-	-	-	2e-07	145479633	26.1	Param	Paramecium tetraurelia strain d4-2	@Eukaryota	412030	;cellular organisms;Eukaryota;Alveolata;Ciliophora;Intramacronucleata;Oligohymenophorea;Peniculida;Parameciidae;Paramecium;Paramecium tetraurelia;Paramecium tetraurelia strain d4-2;
3.22	250	Minc17815	-	-	8e-08	-	-	-	8e-08	2e-06	528062441	32.99	Schiz	Schizosaccharomyces octosporus yFS286	@Eukaryota@Fungi	483514	;cellular organisms;Eukaryota;Opisthokonta;Fungi;Dikarya;Ascomycota;Taphrinomycotina;Schizosaccharomycetes;Schizosaccharomycetales;Schizosaccharomycetaceae;Schizosaccharomyces;Schizosaccharomyces octosporus;Schizosaccharomyces octosporus yFS286;
3.22	250	Minc02576	-	-	2e-10	-	-	-	-	5e-09	298708817	24.76	E_sil	Ectocarpus siliculosus	@Eukaryota	2880	;cellular organisms;Eukaryota;Stramenopiles;PX clade;Phaeophyceae;Ectocarpales;Ectocarpaceae;Ectocarpus;Ectocarpus siliculosus;
3.22	139	Minc08725	-	-	2e-13	-	-	-	2e-13	5e-12	630913748	28.96	Annca	Anncaliia algerae PRA109	@Eukaryota@Fungi	1240240	;cellular organisms;Eukaryota;Opisthokonta;Fungi;Microsporidia;Apansporoblastina;Tubulinosematidae;Anncaliia;Anncaliia algerae;Anncaliia algerae PRA109;
3.22	250	Minc02522	-	-	4e-41	-	-	-	-	1e-39	449702259	37.55	Entam	Entamoeba histolytica KU27	@Eukaryota	885311	;cellular organisms;Eukaryota;Amoebozoa;Archamoebae;Entamoebidae;Entamoeba;Entamoeba histolytica;Entamoeba histolytica KU27;
3.22	113	Minc02009	-	-	2e-06	-	-	-	-	5e-05	528247439	38.46	S_cul	Strigomonas culicis	@Eukaryota	28005	;cellular organisms;Eukaryota;Euglenozoa;Kinetoplastida;Trypanosomatidae;Strigomonadinae;Strigomonas;Strigomonas culicis;
3.22	250	Minc19023	-	-	8e-08	-	-	8e-08	-	2e-06	449447531	44.12	C_sat	Cucumis sativus	@Eukaryota@Viridiplantae	3659	;cellular organisms;Eukaryota;Viridiplantae;Streptophyta;Streptophytina;Embryophyta;Tracheophyta;Euphyllophyta;Spermatophyta;Magnoliophyta;Mesangiospermae;eudicotyledons;Gunneridae;Pentapetalae;rosids;fabids;Cucurbitales;Cucurbitaceae;Benincaseae;Cucumis;Cucumis sativus;
3.22	250	Minc10675	-	-	4e-07	-	-	-	4e-07	1e-05	528062441	33.71	Schiz	Schizosaccharomyces octosporus yFS286	@Eukaryota@Fungi	483514	;cellular organisms;Eukaryota;Opisthokonta;Fungi;Dikarya;Ascomycota;Taphrinomycotina;Schizosaccharomycetes;Schizosaccharomycetales;Schizosaccharomycetaceae;Schizosaccharomyces;Schizosaccharomyces octosporus;Schizosaccharomyces octosporus yFS286;
3.15	272	Minc07739	-	-	3e-10	-	-	-	3e-10	7e-09	321264592	44.64	Crypt	Cryptococcus gattii WM276	@Eukaryota@Fungi	367775	;cellular organisms;Eukaryota;Opisthokonta;Fungi;Dikarya;Basidiomycota;Agaricomycotina;Tremellomycetes;Tremellales;Cryptococcaceae;Cryptococcus;Cryptococcus gattii species complex;Cryptococcus gattii VGI;Cryptococcus gattii WM276;
3.15	250	Minc07861c	-	-	3e-10	-	-	-	-	7e-09	316997033	30.99	M_ova	Monosiga ovata	@Eukaryota	81526	;cellular organisms;Eukaryota;Opisthokonta;Choanoflagellida;Craspedida;Salpingoecidae;Monosiga;Monosiga ovata;
3.15	272	Minc12853	-	-	3e-10	-	-	-	3e-10	7e-09	321264592	44.64	Crypt	Cryptococcus gattii WM276	@Eukaryota@Fungi	367775	;cellular organisms;Eukaryota;Opisthokonta;Fungi;Dikarya;Basidiomycota;Agaricomycotina;Tremellomycetes;Tremellales;Cryptococcaceae;Cryptococcus;Cryptococcus gattii species complex;Cryptococcus gattii VGI;Cryptococcus gattii WM276;
3.15	64	Minc16787	-	-	3e-14	-	-	-	3e-14	7e-13	552937489	23.19	Rhizo	Rhizophagus irregularis DAOM 181602	@Eukaryota@Fungi	747089	;cellular organisms;Eukaryota;Opisthokonta;Fungi;Mucoromycota;Glomeromycotina;Glomeromycetes;Glomerales;Glomeraceae;Rhizophagus;Rhizophagus irregularis;Rhizophagus irregularis DAOM 181602;
3	17	Minc17693	-	-	1e-06	-	-	-	1e-06	2e-05	528315245	31.73	Schiz	Schizosaccharomyces cryophilus OY26	@Eukaryota@Fungi	653667	;cellular organisms;Eukaryota;Opisthokonta;Fungi;Dikarya;Ascomycota;Taphrinomycotina;Schizosaccharomycetes;Schizosaccharomycetales;Schizosaccharomycetaceae;Schizosaccharomyces;Schizosaccharomyces cryophilus;Schizosaccharomyces cryophilus OY26;
3	273	Minc14317	-	-	3e-10	-	-	-	3e-10	6e-09	321264592	44.64	Crypt	Cryptococcus gattii WM276	@Eukaryota@Fungi	367775	;cellular organisms;Eukaryota;Opisthokonta;Fungi;Dikarya;Basidiomycota;Agaricomycotina;Tremellomycetes;Tremellales;Cryptococcaceae;Cryptococcus;Cryptococcus gattii species complex;Cryptococcus gattii VGI;Cryptococcus gattii WM276;
3	250	Minc11302	-	-	1e-61	-	-	-	1e-61	2e-60	58268416	64.34	Crypt	Cryptococcus neoformans var. neoformans JEC21	@Eukaryota@Fungi	214684	;cellular organisms;Eukaryota;Opisthokonta;Fungi;Dikarya;Basidiomycota;Agaricomycotina;Tremellomycetes;Tremellales;Cryptococcaceae;Cryptococcus;Cryptococcus neoformans species complex;Cryptococcus neoformans;Cryptococcus neoformans var. neoformans;Cryptococcus neoformans var. neoformans JEC21;
3	33	Minc08397	-	-	1e-06	-	-	1e-06	-	2e-05	565463650	40.3	C_rub	Capsella rubella	@Eukaryota@Viridiplantae	81985	;cellular organisms;Eukaryota;Viridiplantae;Streptophyta;Streptophytina;Embryophyta;Tracheophyta;Euphyllophyta;Spermatophyta;Magnoliophyta;Mesangiospermae;eudicotyledons;Gunneridae;Pentapetalae;rosids;malvids;Brassicales;Brassicaceae;Camelineae;Capsella;Capsella rubella;
3	173	Minc17857	-	-	1e-07	-	-	-	-	2e-06	586732852	29.37	Tetra	Tetrahymena thermophila SB210	@Eukaryota	312017	;cellular organisms;Eukaryota;Alveolata;Ciliophora;Intramacronucleata;Oligohymenophorea;Hymenostomatida;Tetrahymenina;Tetrahymenidae;Tetrahymena;Tetrahymena thermophila;Tetrahymena thermophila SB210;
3	155	Minc12323	-	-	1e-11	-	-	-	-	2e-10	219128557	24.86	Phaeo	Phaeodactylum tricornutum CCAP 1055/1	@Eukaryota	556484	;cellular organisms;Eukaryota;Stramenopiles;Bacillariophyta;Bacillariophyceae;Bacillariophycidae;Naviculales;Phaeodactylaceae;Phaeodactylum;Phaeodactylum tricornutum;Phaeodactylum tricornutum CCAP 1055/1;
3	250	Minc05145	-	-	3e-20	-	-	3e-20	-	6e-19	604298099	36.36	E_gut	Erythranthe guttata	@Eukaryota@Viridiplantae	4155	;cellular organisms;Eukaryota;Viridiplantae;Streptophyta;Streptophytina;Embryophyta;Tracheophyta;Euphyllophyta;Spermatophyta;Magnoliophyta;Mesangiospermae;eudicotyledons;Gunneridae;Pentapetalae;asterids;lamiids;Lamiales;Phrymaceae;Erythranthe;Erythranthe guttata;
3	9	Minc01572	-	-	1e-07	-	-	-	1e-07	2e-06	589974788	18.39	Clado	Cladophialophora yegresii CBS 114405	@Eukaryota@Fungi	1182544	;cellular organisms;Eukaryota;Opisthokonta;Fungi;Dikarya;Ascomycota;saccharomyceta;Pezizomycotina;leotiomyceta;Eurotiomycetes;Chaetothyriomycetidae;Chaetothyriales;Herpotrichiellaceae;Cladophialophora;Cladophialophora yegresii;Cladophialophora yegresii CBS 114405;
3	261	Minc15113	-	-	5e-24	-	-	-	-	1e-22	403375901	75.86	O_tri	Oxytricha trifallax	@Eukaryota	1172189	;cellular organisms;Eukaryota;Alveolata;Ciliophora;Intramacronucleata;Spirotrichea;Stichotrichia;Sporadotrichida;Oxytrichidae;Oxytrichinae;Oxytricha;Oxytricha trifallax;
2.89	22	Minc08406	-	-	5e-06	-	-	5e-06	-	9e-05	565463650	36.62	C_rub	Capsella rubella	@Eukaryota@Viridiplantae	81985	;cellular organisms;Eukaryota;Viridiplantae;Streptophyta;Streptophytina;Embryophyta;Tracheophyta;Euphyllophyta;Spermatophyta;Magnoliophyta;Mesangiospermae;eudicotyledons;Gunneridae;Pentapetalae;rosids;malvids;Brassicales;Brassicaceae;Camelineae;Capsella;Capsella rubella;
2.86	251	Minc13900	-	-	4e-09	-	-	-	-	7e-08	470381936	28.74	Acant	Acanthamoeba castellanii str. Neff	@Eukaryota	1257118	;cellular organisms;Eukaryota;Amoebozoa;Discosea;Longamoebia;Centramoebida;Acanthamoebidae;Acanthamoeba;Acanthamoeba castellanii;Acanthamoeba castellanii str. Neff;
2.81	271	Minc09530	-	-	3e-10	-	-	-	3e-10	5e-09	321264592	44.64	Crypt	Cryptococcus gattii WM276	@Eukaryota@Fungi	367775	;cellular organisms;Eukaryota;Opisthokonta;Fungi;Dikarya;Basidiomycota;Agaricomycotina;Tremellomycetes;Tremellales;Cryptococcaceae;Cryptococcus;Cryptococcus gattii species complex;Cryptococcus gattii VGI;Cryptococcus gattii WM276;
2.71	250	Minc11909	-	-	2e-11	-	-	-	-	3e-10	403220819	65.91	Theil	Theileria orientalis strain Shintoku	@Eukaryota	869250	;cellular organisms;Eukaryota;Alveolata;Apicomplexa;Aconoidasida;Piroplasmida;Theileriidae;Theileria;Theileria orientalis;Theileria orientalis strain Shintoku;
2.71	252	Minc13284	-	2e-11	-	-	-	-	-	3e-10	516434151	25.39	B_mur	Brachybacterium muris	@Bacteria	219301	;cellular organisms;Bacteria;Terrabacteria group;Actinobacteria;Actinobacteria;Micrococcales;Dermabacteraceae;Brachybacterium;Brachybacterium muris;
2.66	23	Minc14569	-	-	7e-07	-	-	-	7e-07	1e-05	595462569	25.78	Rhizo	Rhizophagus irregularis DAOM 197198w	@Eukaryota@Fungi	1432141	;cellular organisms;Eukaryota;Opisthokonta;Fungi;Mucoromycota;Glomeromycotina;Glomeromycetes;Glomerales;Glomeraceae;Rhizophagus;Rhizophagus irregularis;Rhizophagus irregularis DAOM 197198w;
2.59	250	Minc16945	-	-	3e-12	-	-	-	-	4e-11	123456010	28.57	Trich	Trichomonas vaginalis G3	@Eukaryota	412133	;cellular organisms;Eukaryota;Parabasalia;Trichomonadida;Trichomonadidae;Trichomonas;Trichomonas vaginalis;Trichomonas vaginalis G3;
2.59	17	Minc06914	-	6e-06	-	-	-	-	-	8e-05	494266917	28.17	M_alg	Marinobacter algicola	@Bacteria	236100	;cellular organisms;Bacteria;Proteobacteria;Gammaproteobacteria;Alteromonadales;Alteromonadaceae;Marinobacter;Marinobacter algicola;
2.59	3	Minc02068	-	-	3e-05	-	-	-	3e-05	0.0004	19075466	34.09	Schiz	Schizosaccharomyces pombe 972h-	@Eukaryota@Fungi	284812	;cellular organisms;Eukaryota;Opisthokonta;Fungi;Dikarya;Ascomycota;Taphrinomycotina;Schizosaccharomycetes;Schizosaccharomycetales;Schizosaccharomycetaceae;Schizosaccharomyces;Schizosaccharomyces pombe;Schizosaccharomyces pombe 972h-;
2.53	26	Minc03281	-	-	8e-06	-	-	-	8e-06	0.0001	528062441	30.83	Schiz	Schizosaccharomyces octosporus yFS286	@Eukaryota@Fungi	483514	;cellular organisms;Eukaryota;Opisthokonta;Fungi;Dikarya;Ascomycota;Taphrinomycotina;Schizosaccharomycetes;Schizosaccharomycetales;Schizosaccharomycetaceae;Schizosaccharomyces;Schizosaccharomyces octosporus;Schizosaccharomyces octosporus yFS286;
2.53	251	Minc18729	-	4e-26	-	-	-	-	-	5e-25	512455357	36.59	C_gra	Capnocytophaga granulosa	@Bacteria	45242	;cellular organisms;Bacteria;FCB group;Bacteroidetes/Chlorobi group;Bacteroidetes;Flavobacteriia;Flavobacteriales;Flavobacteriaceae;Capnocytophaga;Capnocytophaga granulosa;
2.48	80	Minc06728	-	-	5e-07	-	-	-	5e-07	6e-06	403174238	24.74	Pucci	Puccinia graminis f. sp. tritici CRL 75-36-700-3	@Eukaryota@Fungi	418459	;cellular organisms;Eukaryota;Opisthokonta;Fungi;Dikarya;Basidiomycota;Pucciniomycotina;Pucciniomycetes;Pucciniales;Pucciniaceae;Puccinia;Puccinia graminis;Puccinia graminis f. sp. tritici;Puccinia graminis f. sp. tritici CRL 75-36-700-3;
2.48	250	Minc03310	-	-	5e-16	-	-	-	5e-16	6e-15	302506088	36.67	Trich	Trichophyton benhamiae CBS 112371	@Eukaryota@Fungi	663331	;cellular organisms;Eukaryota;Opisthokonta;Fungi;Dikarya;Ascomycota;saccharomyceta;Pezizomycotina;leotiomyceta;Eurotiomycetes;Eurotiomycetidae;Onygenales;Arthrodermataceae;Trichophyton;Trichophyton benhamiae;Trichophyton benhamiae CBS 112371;
2.48	495	Minc02461	-	5e-14	-	-	-	-	-	6e-13	488783006	44.21	T_pha	Treponema phagedenis	@Bacteria	162	;cellular organisms;Bacteria;Spirochaetes;Spirochaetia;Spirochaetales;Spirochaetaceae;Treponema;Treponema phagedenis;
2.42	54	Minc14495	-	-	8e-06	-	-	-	-	9e-05	71746562	40.98	Trypa	Trypanosoma brucei brucei TREU927	@Eukaryota	185431	;cellular organisms;Eukaryota;Euglenozoa;Kinetoplastida;Trypanosomatidae;Trypanosoma;Trypanozoon;Trypanosoma brucei;Trypanosoma brucei brucei;Trypanosoma brucei brucei TREU927;
2.41	250	Minc07045	-	-	9e-22	-	-	-	-	1e-20	298707435	25.64	E_sil	Ectocarpus siliculosus	@Eukaryota	2880	;cellular organisms;Eukaryota;Stramenopiles;PX clade;Phaeophyceae;Ectocarpales;Ectocarpaceae;Ectocarpus;Ectocarpus siliculosus;
2.3	250	Minc04870	-	-	1e-63	-	-	1e-63	-	1e-62	527194998	40.82	G_aur	Genlisea aurea	@Eukaryota@Viridiplantae	192259	;cellular organisms;Eukaryota;Viridiplantae;Streptophyta;Streptophytina;Embryophyta;Tracheophyta;Euphyllophyta;Spermatophyta;Magnoliophyta;Mesangiospermae;eudicotyledons;Gunneridae;Pentapetalae;asterids;lamiids;Lamiales;Lentibulariaceae;Genlisea;Genlisea aurea;
2.3	250	Minc07079	-	-	3e-44	-	-	3e-44	-	3e-43	302774344	32.16	S_moe	Selaginella moellendorffii	@Eukaryota@Viridiplantae	88036	;cellular organisms;Eukaryota;Viridiplantae;Streptophyta;Streptophytina;Embryophyta;Tracheophyta;Lycopodiopsida;Selaginellales;Selaginellaceae;Selaginella;Selaginella moellendorffii;
2.3	84	Minc05055	-	-	2e-07	-	-	-	2e-07	2e-06	400598809	46.77	Beauv	Beauveria bassiana ARSEF 2860	@Eukaryota@Fungi	655819	;cellular organisms;Eukaryota;Opisthokonta;Fungi;Dikarya;Ascomycota;saccharomyceta;Pezizomycotina;leotiomyceta;sordariomyceta;Sordariomycetes;Hypocreomycetidae;Hypocreales;Cordycipitaceae;Beauveria;Beauveria bassiana;Beauveria bassiana ARSEF 2860;
2.3	250	Minc18931	-	-	2e-08	-	-	-	2e-08	2e-07	639560235	32.14	Tille	Tilletiaria anomala UBC 951	@Eukaryota@Fungi	1037660	;cellular organisms;Eukaryota;Opisthokonta;Fungi;Dikarya;Basidiomycota;Ustilaginomycotina;Exobasidiomycetes;Georgefischeriales;Tilletiariaceae;Tilletiaria;Tilletiaria anomala;Tilletiaria anomala UBC 951;
2.3	149	Minc10043	-	-	8e-07	-	-	8e-07	-	8e-06	643716969	31.25	J_cur	Jatropha curcas	@Eukaryota@Viridiplantae	180498	;cellular organisms;Eukaryota;Viridiplantae;Streptophyta;Streptophytina;Embryophyta;Tracheophyta;Euphyllophyta;Spermatophyta;Magnoliophyta;Mesangiospermae;eudicotyledons;Gunneridae;Pentapetalae;rosids;fabids;Malpighiales;Euphorbiaceae;Crotonoideae;Jatropheae;Jatropha;Jatropha curcas;
2.3	251	Minc12524	-	-	4e-09	-	-	-	4e-09	4e-08	648159714	50	Galer	Galerina marginata CBS 339.88	@Eukaryota@Fungi	685588	;cellular organisms;Eukaryota;Opisthokonta;Fungi;Dikarya;Basidiomycota;Agaricomycotina;Agaricomycetes;Agaricomycetidae;Agaricales;Strophariaceae;Galerina;Galerina marginata;Galerina marginata CBS 339.88;
2.3	250	Minc13788	-	2e-16	-	-	-	-	-	2e-15	522059150	74.42	L_per	Lewinella persica	@Bacteria	70998	;cellular organisms;Bacteria;FCB group;Bacteroidetes/Chlorobi group;Bacteroidetes;Saprospiria;Saprospirales;Lewinellaceae;Lewinella;Lewinella persica;
2.3	681	Minc12425	-	-	1e-20	-	-	-	1e-20	1e-19	425767015	62.5	Penic	Penicillium digitatum PHI26	@Eukaryota@Fungi	1170229	;cellular organisms;Eukaryota;Opisthokonta;Fungi;Dikarya;Ascomycota;saccharomyceta;Pezizomycotina;leotiomyceta;Eurotiomycetes;Eurotiomycetidae;Eurotiales;Aspergillaceae;Penicillium;Penicillium digitatum;Penicillium digitatum PHI26;
2.3	250	Minc12602	-	2e-09	-	-	-	-	-	2e-08	576101421	33.33	Borre	Borrelia crocidurae DOU	@Bacteria	1293575	;cellular organisms;Bacteria;Spirochaetes;Spirochaetia;Spirochaetales;Borreliaceae;Borrelia;Borrelia crocidurae;Borrelia crocidurae DOU;
2.3	250	Minc10978	-	-	1e-11	-	-	-	-	1e-10	323454498	32.85	A_ano	Aureococcus anophagefferens	@Eukaryota	44056	;cellular organisms;Eukaryota;Stramenopiles;Pelagophyceae;Pelagomonadales;Aureococcus;Aureococcus anophagefferens;
2.3	250	Minc07579	-	-	2e-23	-	-	2e-23	-	2e-22	303271805	57.32	Micro	Micromonas pusilla CCMP1545	@Eukaryota@Viridiplantae	564608	;cellular organisms;Eukaryota;Viridiplantae;Chlorophyta;prasinophytes;Mamiellophyceae;Mamiellales;Mamiellaceae;Micromonas;Micromonas pusilla;Micromonas pusilla CCMP1545;
2.3	143	Minc15116	-	-	2e-06	-	-	2e-06	-	2e-05	15238075	38.36	A_tha	Arabidopsis thaliana	@Eukaryota@Viridiplantae	3702	;cellular organisms;Eukaryota;Viridiplantae;Streptophyta;Streptophytina;Embryophyta;Tracheophyta;Euphyllophyta;Spermatophyta;Magnoliophyta;Mesangiospermae;eudicotyledons;Gunneridae;Pentapetalae;rosids;malvids;Brassicales;Brassicaceae;Camelineae;Arabidopsis;Arabidopsis thaliana;
2.3	250	Minc02457	-	5e-17	-	-	-	-	-	5e-16	515779982	59.7	C_bei	Clostridium beijerinckii	@Bacteria	1520	;cellular organisms;Bacteria;Terrabacteria group;Firmicutes;Clostridia;Clostridiales;Clostridiaceae;Clostridium;Clostridium beijerinckii;
2.3	250	Minc07190	-	-	8e-10	-	-	8e-10	-	8e-09	604303676	46.15	E_gut	Erythranthe guttata	@Eukaryota@Viridiplantae	4155	;cellular organisms;Eukaryota;Viridiplantae;Streptophyta;Streptophytina;Embryophyta;Tracheophyta;Euphyllophyta;Spermatophyta;Magnoliophyta;Mesangiospermae;eudicotyledons;Gunneridae;Pentapetalae;asterids;lamiids;Lamiales;Phrymaceae;Erythranthe;Erythranthe guttata;
2.3	19	Minc01897	-	-	4e-06	-	-	-	-	4e-05	472463152	57.14	Entam	Entamoeba histolytica HM-3:IMSS	@Eukaryota	885315	;cellular organisms;Eukaryota;Amoebozoa;Archamoebae;Entamoebidae;Entamoeba;Entamoeba histolytica;Entamoeba histolytica HM-3:IMSS;
2.3	250	Minc03798	-	-	2e-19	-	-	-	-	2e-18	301099522	34.3	Phyto	Phytophthora infestans T30-4	@Eukaryota	403677	;cellular organisms;Eukaryota;Stramenopiles;Oomycetes;Peronosporales;Phytophthora;Phytophthora infestans;Phytophthora infestans T30-4;
2.3	3	Minc16855	-	-	1e-05	-	-	-	1e-05	0.0001	402467809	37.84	Edhaz	Edhazardia aedis USNM 41457	@Eukaryota@Fungi	1003232	;cellular organisms;Eukaryota;Opisthokonta;Fungi;Microsporidia;Microsporidia incertae sedis;Culicosporidae;Edhazardia;Edhazardia aedis;Edhazardia aedis USNM 41457;
2.3	250	Minc00841	-	-	4e-19	-	-	-	-	4e-18	298707435	25.6	E_sil	Ectocarpus siliculosus	@Eukaryota	2880	;cellular organisms;Eukaryota;Stramenopiles;PX clade;Phaeophyceae;Ectocarpales;Ectocarpaceae;Ectocarpus;Ectocarpus siliculosus;
2.2	250	Minc13345	-	-	1e-09	-	-	-	1e-09	9e-09	384492813	29.58	Rhizo	Rhizopus delemar RA 99-880	@Eukaryota@Fungi	246409	;cellular organisms;Eukaryota;Opisthokonta;Fungi;Mucoromycota;Mucoromycotina;Mucorales;Mucorineae;Rhizopodaceae;Rhizopus;Rhizopus delemar;Rhizopus delemar RA 99-880;
2.2	36	Minc07142b	-	-	1e-06	-	-	-	-	9e-06	316997053	32.2	M_ova	Monosiga ovata	@Eukaryota	81526	;cellular organisms;Eukaryota;Opisthokonta;Choanoflagellida;Craspedida;Salpingoecidae;Monosiga;Monosiga ovata;
2.12	250	Minc12690	-	-	6e-14	-	-	-	6e-14	5e-13	630914314	39.78	Annca	Anncaliia algerae PRA109	@Eukaryota@Fungi	1240240	;cellular organisms;Eukaryota;Opisthokonta;Fungi;Microsporidia;Apansporoblastina;Tubulinosematidae;Anncaliia;Anncaliia algerae;Anncaliia algerae PRA109;
2.12	250	Minc15630	-	-	6e-07	-	-	-	6e-07	5e-06	587707936	42.11	Fusar	Fusarium oxysporum f. sp. lycopersici MN25	@Eukaryota@Fungi	1080343	;cellular organisms;Eukaryota;Opisthokonta;Fungi;Dikarya;Ascomycota;saccharomyceta;Pezizomycotina;leotiomyceta;sordariomyceta;Sordariomycetes;Hypocreomycetidae;Hypocreales;Nectriaceae;Fusarium;Fusarium oxysporum species complex;Fusarium oxysporum;Fusarium oxysporum f. sp. lycopersici;Fusarium oxysporum f. sp. lycopersici MN25;
2.08	250	Minc07773	-	1e-17	-	-	-	-	-	8e-17	504681643	52.38	Wolba	Wolbachia	@Bacteria	953	;cellular organisms;Bacteria;Proteobacteria;Alphaproteobacteria;Rickettsiales;Anaplasmataceae;Wolbachieae;Wolbachia;
2.08	3	Minc09321	-	-	1e-05	-	-	-	-	8e-05	470247320	42.11	D_fas	Dictyostelium fasciculatum	@Eukaryota	261658	;cellular organisms;Eukaryota;Amoebozoa;Mycetozoa;Dictyosteliida;Dictyostelium;Dictyostelium fasciculatum;
2.01	6	Minc15822	-	-	8e-05	-	-	-	-	0.0006	470492555	28.43	Acant	Acanthamoeba castellanii str. Neff	@Eukaryota	1257118	;cellular organisms;Eukaryota;Amoebozoa;Discosea;Longamoebia;Centramoebida;Acanthamoebidae;Acanthamoeba;Acanthamoeba castellanii;Acanthamoeba castellanii str. Neff;
1.97	250	Minc13750	-	-	7e-15	-	-	-	7e-15	5e-14	630961260	37	Anthr	Anthracocystis flocculosa PF-1	@Eukaryota@Fungi	1277687	;cellular organisms;Eukaryota;Opisthokonta;Fungi;Dikarya;Basidiomycota;Ustilaginomycotina;Ustilaginomycetes;Ustilaginales;Ustilaginaceae;Anthracocystis;Anthracocystis flocculosa;Anthracocystis flocculosa PF-1;
1.9	250	Minc03432	-	-	6e-28	-	-	6e-28	-	4e-27	302776536	35.68	S_moe	Selaginella moellendorffii	@Eukaryota@Viridiplantae	88036	;cellular organisms;Eukaryota;Viridiplantae;Streptophyta;Streptophytina;Embryophyta;Tracheophyta;Lycopodiopsida;Selaginellales;Selaginellaceae;Selaginella;Selaginella moellendorffii;
1.9	240	Minc03582	-	-	3e-09	-	-	3e-09	-	2e-08	302836075	55.32	Volvo	Volvox carteri f. nagariensis	@Eukaryota@Viridiplantae	3068	;cellular organisms;Eukaryota;Viridiplantae;Chlorophyta;Chlorophyceae;Chlamydomonadales;Volvocaceae;Volvox;Volvox carteri;Volvox carteri f. nagariensis;
1.9	152	Minc14228	-	-	3e-06	-	-	3e-06	-	2e-05	15238075	38.36	A_tha	Arabidopsis thaliana	@Eukaryota@Viridiplantae	3702	;cellular organisms;Eukaryota;Viridiplantae;Streptophyta;Streptophytina;Embryophyta;Tracheophyta;Euphyllophyta;Spermatophyta;Magnoliophyta;Mesangiospermae;eudicotyledons;Gunneridae;Pentapetalae;rosids;malvids;Brassicales;Brassicaceae;Camelineae;Arabidopsis;Arabidopsis thaliana;
1.9	251	Minc06248	-	-	6e-09	-	-	-	6e-09	4e-08	119495936	36.96	Asper	Aspergillus fischeri NRRL 181	@Eukaryota@Fungi	331117	;cellular organisms;Eukaryota;Opisthokonta;Fungi;Dikarya;Ascomycota;saccharomyceta;Pezizomycotina;leotiomyceta;Eurotiomycetes;Eurotiomycetidae;Eurotiales;Aspergillaceae;Aspergillus;Aspergillus fischeri;Aspergillus fischeri NRRL 181;
1.9	250	Minc13621	-	-	3e-14	-	-	3e-14	-	2e-13	297744601	43.68	V_vin	Vitis vinifera	@Eukaryota@Viridiplantae	29760	;cellular organisms;Eukaryota;Viridiplantae;Streptophyta;Streptophytina;Embryophyta;Tracheophyta;Euphyllophyta;Spermatophyta;Magnoliophyta;Mesangiospermae;eudicotyledons;Gunneridae;Pentapetalae;rosids;rosids incertae sedis;Vitales;Vitaceae;Vitis;Vitis vinifera;
1.9	250	Minc09409	-	-	6e-19	-	-	-	6e-19	4e-18	595454890	85.71	Rhizo	Rhizophagus irregularis DAOM 197198w	@Eukaryota@Fungi	1432141	;cellular organisms;Eukaryota;Opisthokonta;Fungi;Mucoromycota;Glomeromycotina;Glomeromycetes;Glomerales;Glomeraceae;Rhizophagus;Rhizophagus irregularis;Rhizophagus irregularis DAOM 197198w;
1.9	250	Minc02230	-	-	3e-26	-	-	-	-	2e-25	281212193	50.52	Polys	Polysphondylium pallidum PN500	@Eukaryota	670386	;cellular organisms;Eukaryota;Amoebozoa;Mycetozoa;Dictyosteliida;Polysphondylium;Polysphondylium pallidum;Polysphondylium pallidum PN500;
1.9	250	Minc02104	-	6e-12	-	-	-	-	-	4e-11	501007635	40.66	C_bei	Clostridium beijerinckii	@Bacteria	1520	;cellular organisms;Bacteria;Terrabacteria group;Firmicutes;Clostridia;Clostridiales;Clostridiaceae;Clostridium;Clostridium beijerinckii;
1.83	250	Minc01503	-	-	8e-22	-	-	-	-	5e-21	298707435	25.64	E_sil	Ectocarpus siliculosus	@Eukaryota	2880	;cellular organisms;Eukaryota;Stramenopiles;PX clade;Phaeophyceae;Ectocarpales;Ectocarpaceae;Ectocarpus;Ectocarpus siliculosus;
1.79	218	Minc09371	-	-	1e-06	-	-	-	1e-06	6e-06	528315245	38.75	Schiz	Schizosaccharomyces cryophilus OY26	@Eukaryota@Fungi	653667	;cellular organisms;Eukaryota;Opisthokonta;Fungi;Dikarya;Ascomycota;Taphrinomycotina;Schizosaccharomycetes;Schizosaccharomycetales;Schizosaccharomycetaceae;Schizosaccharomyces;Schizosaccharomyces cryophilus;Schizosaccharomyces cryophilus OY26;
1.79	183	Minc10032	-	-	5e-09	-	-	-	5e-09	3e-08	575518317	59.65	nd	[Candida] tenuis ATCC 10573	@Eukaryota@Fungi	590646	;cellular organisms;Eukaryota;Opisthokonta;Fungi;Dikarya;Ascomycota;saccharomyceta;Saccharomycotina;Saccharomycetes;Saccharomycetales;Debaryomycetaceae;Yamadazyma;Yamadazyma/Candida clade;[Candida] tenuis;[Candida] tenuis ATCC 10573;
1.79	5	Minc03096	-	-	5e-05	-	-	-	5e-05	0.0003	599381878	32.98	Phane	Phanerochaete carnosa HHB-10118-sp	@Eukaryota@Fungi	650164	;cellular organisms;Eukaryota;Opisthokonta;Fungi;Dikarya;Basidiomycota;Agaricomycotina;Agaricomycetes;Agaricomycetes incertae sedis;Polyporales;Phanerochaetaceae;Phanerochaete;Phanerochaete carnosa;Phanerochaete carnosa HHB-10118-sp;
1.79	79	Minc03097	-	-	5e-09	-	-	-	-	3e-08	568003258	42.59	P_par	Phytophthora parasitica	@Eukaryota	4792	;cellular organisms;Eukaryota;Stramenopiles;Oomycetes;Peronosporales;Phytophthora;Phytophthora parasitica;
1.79	269	Minc02703	-	-	-	-	5e-18	-	-	3e-17	109255387	30.05	Chori	Choristoneura occidentalis granulovirus	@Viruses	364745	;Viruses;dsDNA viruses, no RNA stage;Baculoviridae;Betabaculovirus;unclassified Betabaculovirus;Choristoneura occidentalis granulovirus;
1.74	89	Minc09275	-	-	-	-	7e-10	-	-	4e-09	561133098	38.24	Staph	Staphylococcus phage S25-4	@Viruses	1041527	;Viruses;dsDNA viruses, no RNA stage;Caudovirales;Myoviridae;Spounavirinae;Kayvirus;Staphylococcus virus S25-4;Staphylococcus phage S25-4;
1.74	498	Minc05274	-	-	7e-14	-	-	-	-	4e-13	551626218	42.31	Emili	Emiliania huxleyi CCMP1516	@Eukaryota	280463	;cellular organisms;Eukaryota;Haptophyceae;Isochrysidales;Noelaerhabdaceae;Emiliania;Emiliania huxleyi;Emiliania huxleyi CCMP1516;
1.71	250	Minc14976	-	9e-27	-	-	-	-	-	5e-26	565838761	50	R_lac	Ruminococcus lactaris	@Bacteria	46228	;cellular organisms;Bacteria;Terrabacteria group;Firmicutes;Clostridia;Clostridiales;Ruminococcaceae;Ruminococcus;Ruminococcus lactaris;
1.71	26	Minc06456	-	-	9e-06	-	-	-	9e-06	5e-05	384493899	37.14	Rhizo	Rhizopus delemar RA 99-880	@Eukaryota@Fungi	246409	;cellular organisms;Eukaryota;Opisthokonta;Fungi;Mucoromycota;Mucoromycotina;Mucorales;Mucorineae;Rhizopodaceae;Rhizopus;Rhizopus delemar;Rhizopus delemar RA 99-880;
1.61	67	Minc10430	-	8e-13	-	-	-	-	-	4e-12	517091329	49.44	C_cyn	Capnocytophaga cynodegmi	@Bacteria	28189	;cellular organisms;Bacteria;FCB group;Bacteroidetes/Chlorobi group;Bacteroidetes;Flavobacteriia;Flavobacteriales;Flavobacteriaceae;Capnocytophaga;Capnocytophaga cynodegmi;
1.61	250	Minc07680	-	-	4e-07	-	-	-	4e-07	2e-06	530774875	41.98	Schiz	Schizosaccharomyces japonicus yFS275	@Eukaryota@Fungi	402676	;cellular organisms;Eukaryota;Opisthokonta;Fungi;Dikarya;Ascomycota;Taphrinomycotina;Schizosaccharomycetes;Schizosaccharomycetales;Schizosaccharomycetaceae;Schizosaccharomyces;Schizosaccharomyces japonicus;Schizosaccharomyces japonicus yFS275;
1.61	250	Minc00537	-	-	2e-27	-	-	-	-	1e-26	281212193	52.58	Polys	Polysphondylium pallidum PN500	@Eukaryota	670386	;cellular organisms;Eukaryota;Amoebozoa;Mycetozoa;Dictyosteliida;Polysphondylium;Polysphondylium pallidum;Polysphondylium pallidum PN500;
1.61	250	Minc08915	-	2e-15	-	-	-	-	-	1e-14	490928149	41.49	B_afz	Borreliella afzelii	@Bacteria	29518	;cellular organisms;Bacteria;Spirochaetes;Spirochaetia;Spirochaetales;Borreliaceae;Borreliella;Borreliella afzelii;
1.61	24	Minc17103	-	-	2e-06	-	-	-	2e-06	1e-05	552939199	55.36	Rhizo	Rhizophagus irregularis DAOM 181602	@Eukaryota@Fungi	747089	;cellular organisms;Eukaryota;Opisthokonta;Fungi;Mucoromycota;Glomeromycotina;Glomeromycetes;Glomerales;Glomeraceae;Rhizophagus;Rhizophagus irregularis;Rhizophagus irregularis DAOM 181602;
1.61	261	Minc07762	-	-	2e-30	-	-	-	-	1e-29	403375901	69.05	O_tri	Oxytricha trifallax	@Eukaryota	1172189	;cellular organisms;Eukaryota;Alveolata;Ciliophora;Intramacronucleata;Spirotrichea;Stichotrichia;Sporadotrichida;Oxytrichidae;Oxytrichinae;Oxytricha;Oxytricha trifallax;
1.61	4	Minc05033	-	-	0.0002	-	-	-	-	0.001	298706992	27.12	E_sil	Ectocarpus siliculosus	@Eukaryota	2880	;cellular organisms;Eukaryota;Stramenopiles;PX clade;Phaeophyceae;Ectocarpales;Ectocarpaceae;Ectocarpus;Ectocarpus siliculosus;
1.61	35	Minc02577	-	-	6e-07	-	-	-	6e-07	3e-06	213404144	48.08	Schiz	Schizosaccharomyces japonicus yFS275	@Eukaryota@Fungi	402676	;cellular organisms;Eukaryota;Opisthokonta;Fungi;Dikarya;Ascomycota;Taphrinomycotina;Schizosaccharomycetes;Schizosaccharomycetales;Schizosaccharomycetaceae;Schizosaccharomyces;Schizosaccharomyces japonicus;Schizosaccharomyces japonicus yFS275;
1.61	40	Minc04467	-	-	4e-11	-	-	4e-11	-	2e-10	302848998	32.48	Volvo	Volvox carteri f. nagariensis	@Eukaryota@Viridiplantae	3068	;cellular organisms;Eukaryota;Viridiplantae;Chlorophyta;Chlorophyceae;Chlamydomonadales;Volvocaceae;Volvox;Volvox carteri;Volvox carteri f. nagariensis;
1.61	254	Minc11600	-	-	2e-11	-	-	2e-11	-	1e-10	552847360	52.73	C_var	Chlorella variabilis	@Eukaryota@Viridiplantae	554065	;cellular organisms;Eukaryota;Viridiplantae;Chlorophyta;Trebouxiophyceae;Chlorellales;Chlorellaceae;Chlorella;Chlorella variabilis;
1.61	41	Minc03089	-	-	1e-05	-	-	-	-	5e-05	340057025	38.78	Trypa	Trypanosoma vivax Y486	@Eukaryota	1055687	;cellular organisms;Eukaryota;Euglenozoa;Kinetoplastida;Trypanosomatidae;Trypanosoma;Duttonella;Trypanosoma vivax;Trypanosoma vivax Y486;
1.61	14	Minc02089b	-	4e-06	-	-	-	-	-	2e-05	499904749	41.82	C_hut	Cytophaga hutchinsonii	@Bacteria	985	;cellular organisms;Bacteria;FCB group;Bacteroidetes/Chlorobi group;Bacteroidetes;Cytophagia;Cytophagales;Cytophagaceae;Cytophaga;Cytophaga hutchinsonii;
1.5	352	Minc07187	-	-	2e-11	-	-	2e-11	-	9e-11	15220991	48.61	A_tha	Arabidopsis thaliana	@Eukaryota@Viridiplantae	3702	;cellular organisms;Eukaryota;Viridiplantae;Streptophyta;Streptophytina;Embryophyta;Tracheophyta;Euphyllophyta;Spermatophyta;Magnoliophyta;Mesangiospermae;eudicotyledons;Gunneridae;Pentapetalae;rosids;malvids;Brassicales;Brassicaceae;Camelineae;Arabidopsis;Arabidopsis thaliana;
1.49	153	Minc00745	-	-	9e-09	-	-	-	-	4e-08	514690193	43.94	S_ros	Salpingoeca rosetta	@Eukaryota	946362	;cellular organisms;Eukaryota;Opisthokonta;Choanoflagellida;Craspedida;Salpingoecidae;Salpingoeca;Salpingoeca rosetta;
1.49	7	Minc18793	-	-	9e-05	-	-	-	9e-05	0.0004	528315245	35.35	Schiz	Schizosaccharomyces cryophilus OY26	@Eukaryota@Fungi	653667	;cellular organisms;Eukaryota;Opisthokonta;Fungi;Dikarya;Ascomycota;Taphrinomycotina;Schizosaccharomycetes;Schizosaccharomycetales;Schizosaccharomycetaceae;Schizosaccharomyces;Schizosaccharomyces cryophilus;Schizosaccharomyces cryophilus OY26;
1.46	250	Minc06206	-	-	7e-10	-	-	-	-	3e-09	471202329	28.74	Entam	Entamoeba invadens IP1	@Eukaryota	370355	;cellular organisms;Eukaryota;Amoebozoa;Archamoebae;Entamoebidae;Entamoeba;Entamoeba invadens;Entamoeba invadens IP1;
1.46	250	Minc00661	-	-	7e-71	-	-	-	7e-71	3e-70	164427004	70.07	Neuro	Neurospora crassa OR74A	@Eukaryota@Fungi	367110	;cellular organisms;Eukaryota;Opisthokonta;Fungi;Dikarya;Ascomycota;saccharomyceta;Pezizomycotina;leotiomyceta;sordariomyceta;Sordariomycetes;Sordariomycetidae;Sordariales;Sordariaceae;Neurospora;Neurospora crassa;Neurospora crassa OR74A;
1.39	250	Minc06201	-	-	1e-10	-	-	-	-	4e-10	470241118	27.8	D_fas	Dictyostelium fasciculatum	@Eukaryota	261658	;cellular organisms;Eukaryota;Amoebozoa;Mycetozoa;Dictyosteliida;Dictyostelium;Dictyostelium fasciculatum;
1.39	19	Minc07142a	-	-	1e-06	-	-	-	-	4e-06	316997053	32.2	M_ova	Monosiga ovata	@Eukaryota	81526	;cellular organisms;Eukaryota;Opisthokonta;Choanoflagellida;Craspedida;Salpingoecidae;Monosiga;Monosiga ovata;
1.39	4	Minc08987	-	-	0.0001	-	-	-	0.0001	0.0004	599093008	52.5	Punct	Punctularia strigosozonata HHB-11173 SS5	@Eukaryota@Fungi	741275	;cellular organisms;Eukaryota;Opisthokonta;Fungi;Dikarya;Basidiomycota;Agaricomycotina;Agaricomycetes;Agaricomycetes incertae sedis;Corticiales;Punctulariaceae;Punctularia;Punctularia strigosozonata;Punctularia strigosozonata HHB-11173 SS5;
1.39	250	Minc02473	-	-	2e-10	-	-	-	2e-10	8e-10	576046838	45.07	Chaet	Chaetomium thermophilum var. thermophilum DSM 1495	@Eukaryota@Fungi	759272	;cellular organisms;Eukaryota;Opisthokonta;Fungi;Dikarya;Ascomycota;saccharomyceta;Pezizomycotina;leotiomyceta;sordariomyceta;Sordariomycetes;Sordariomycetidae;Sordariales;Chaetomiaceae;Chaetomium;Chaetomium thermophilum;Chaetomium thermophilum var. thermophilum;Chaetomium thermophilum var. thermophilum DSM 1495;
1.39	66	Minc18897	-	-	1e-07	-	-	-	1e-07	4e-07	552929084	25.98	Rhizo	Rhizophagus irregularis DAOM 181602	@Eukaryota@Fungi	747089	;cellular organisms;Eukaryota;Opisthokonta;Fungi;Mucoromycota;Glomeromycotina;Glomeromycetes;Glomerales;Glomeraceae;Rhizophagus;Rhizophagus irregularis;Rhizophagus irregularis DAOM 181602;
1.39	192	Minc03387	-	-	5e-09	-	-	-	5e-09	2e-08	575518317	59.65	nd	[Candida] tenuis ATCC 10573	@Eukaryota@Fungi	590646	;cellular organisms;Eukaryota;Opisthokonta;Fungi;Dikarya;Ascomycota;saccharomyceta;Saccharomycotina;Saccharomycetes;Saccharomycetales;Debaryomycetaceae;Yamadazyma;Yamadazyma/Candida clade;[Candida] tenuis;[Candida] tenuis ATCC 10573;
1.39	8	Minc19085	-	-	2e-05	-	-	-	-	8e-05	470268661	36.11	D_fas	Dictyostelium fasciculatum	@Eukaryota	261658	;cellular organisms;Eukaryota;Amoebozoa;Mycetozoa;Dictyosteliida;Dictyostelium;Dictyostelium fasciculatum;
1.39	21	Minc16067	-	-	1e-05	-	-	-	1e-05	4e-05	594711481	41.07	M_rob	Metarhizium robertsii	@Eukaryota@Fungi	568076	;cellular organisms;Eukaryota;Opisthokonta;Fungi;Dikarya;Ascomycota;saccharomyceta;Pezizomycotina;leotiomyceta;sordariomyceta;Sordariomycetes;Hypocreomycetidae;Hypocreales;Clavicipitaceae;Metarhizium;Metarhizium robertsii;
1.25	4	Minc19048	-	-	0.0002	-	-	-	-	0.0007	470492555	28.43	Acant	Acanthamoeba castellanii str. Neff	@Eukaryota	1257118	;cellular organisms;Eukaryota;Amoebozoa;Discosea;Longamoebia;Centramoebida;Acanthamoebidae;Acanthamoeba;Acanthamoeba castellanii;Acanthamoeba castellanii str. Neff;
1.2	75	Minc00253	-	6e-06	-	-	-	-	-	2e-05	489206692	32.05	P_aer	Pseudomonas aeruginosa	@Bacteria	287	;cellular organisms;Bacteria;Proteobacteria;Gammaproteobacteria;Pseudomonadales;Pseudomonadaceae;Pseudomonas;Pseudomonas aeruginosa group;Pseudomonas aeruginosa;
1.2	250	Minc00256	-	-	6e-08	-	-	-	-	2e-07	574463700	56	A_inv	Aphanomyces invadans	@Eukaryota	157072	;cellular organisms;Eukaryota;Stramenopiles;Oomycetes;Saprolegniales;Saprolegniaceae;Aphanomyces;Aphanomyces invadans;
1.2	264	Minc10703	-	-	6e-10	-	-	-	6e-10	2e-09	511005541	40.79	Mucor	Mucor circinelloides f. circinelloides 1006PhL	@Eukaryota@Fungi	1220926	;cellular organisms;Eukaryota;Opisthokonta;Fungi;Mucoromycota;Mucoromycotina;Mucorales;Mucorineae;Mucoraceae;Mucor;Mucor circinelloides;Mucor circinelloides f. circinelloides;Mucor circinelloides f. circinelloides 1006PhL;
1.2	7	Minc05109	-	-	6e-05	-	-	-	6e-05	0.0002	552940317	49.12	Rhizo	Rhizophagus irregularis DAOM 181602	@Eukaryota@Fungi	747089	;cellular organisms;Eukaryota;Opisthokonta;Fungi;Mucoromycota;Glomeromycotina;Glomeromycetes;Glomerales;Glomeraceae;Rhizophagus;Rhizophagus irregularis;Rhizophagus irregularis DAOM 181602;
1.2	95	Minc07861b	-	-	6e-07	-	-	-	-	2e-06	316997053	32.2	M_ova	Monosiga ovata	@Eukaryota	81526	;cellular organisms;Eukaryota;Opisthokonta;Choanoflagellida;Craspedida;Salpingoecidae;Monosiga;Monosiga ovata;
1.2	41	Minc17173	-	-	9e-11	-	-	-	9e-11	3e-10	330931210	45.06	Pyren	Pyrenophora teres f. teres 0-1	@Eukaryota@Fungi	861557	;cellular organisms;Eukaryota;Opisthokonta;Fungi;Dikarya;Ascomycota;saccharomyceta;Pezizomycotina;leotiomyceta;dothideomyceta;Dothideomycetes;Pleosporomycetidae;Pleosporales;Pleosporineae;Pleosporaceae;Pyrenophora;Pyrenophora teres;Pyrenophora teres f. teres;Pyrenophora teres f. teres 0-1;
1.2	267	Minc09796	-	-	3e-19	-	-	-	-	1e-18	608697679	38.1	G_nip	Gregarina niphandrodes	@Eukaryota	110365	;cellular organisms;Eukaryota;Alveolata;Apicomplexa;Conoidasida;Gregarinasina;Eugregarinorida;Gregarinidae;Gregarina;Gregarina niphandrodes;
1.2	250	Minc08085	-	3e-08	-	-	-	-	-	1e-07	495938910	41.03	R_eur	Rhodopirellula europaea	@Bacteria	1263866	;cellular organisms;Bacteria;PVC group;Planctomycetes;Planctomycetia;Planctomycetales;Planctomycetaceae;Rhodopirellula;Rhodopirellula europaea;
1.2	18	Minc14704	-	-	6e-05	-	-	-	-	0.0002	641541019	29.33	Sapro	Saprolegnia parasitica CBS 223.65	@Eukaryota	695850	;cellular organisms;Eukaryota;Stramenopiles;Oomycetes;Saprolegniales;Saprolegniaceae;Saprolegnia;Saprolegnia parasitica;Saprolegnia parasitica CBS 223.65;
1.1	250	Minc08643	-	1e-16	-	-	-	-	-	3e-16	501391909	35.16	C_bot	Clostridium botulinum	@Bacteria	1491	;cellular organisms;Bacteria;Terrabacteria group;Firmicutes;Clostridia;Clostridiales;Clostridiaceae;Clostridium;Clostridium botulinum;
1.1	250	Minc06202	-	-	2e-08	-	-	-	-	6e-08	608696767	25.88	G_nip	Gregarina niphandrodes	@Eukaryota	110365	;cellular organisms;Eukaryota;Alveolata;Apicomplexa;Conoidasida;Gregarinasina;Eugregarinorida;Gregarinidae;Gregarina;Gregarina niphandrodes;
1.1	19	Minc10940	-	3e-06	-	-	-	-	-	9e-06	516274742	31.46	Pseud	Pseudomonas	@Bacteria	286	;cellular organisms;Bacteria;Proteobacteria;Gammaproteobacteria;Pseudomonadales;Pseudomonadaceae;Pseudomonas;
1.1	18	Minc18145e	-	-	1e-05	-	-	1e-05	-	3e-05	587930720	40.98	M_not	Morus notabilis	@Eukaryota@Viridiplantae	981085	;cellular organisms;Eukaryota;Viridiplantae;Streptophyta;Streptophytina;Embryophyta;Tracheophyta;Euphyllophyta;Spermatophyta;Magnoliophyta;Mesangiospermae;eudicotyledons;Gunneridae;Pentapetalae;rosids;fabids;Rosales;Moraceae;Morus;Morus notabilis;
1.1	61	Minc01803	-	-	1e-15	-	-	-	1e-15	3e-15	630913139	32.35	Annca	Anncaliia algerae PRA109	@Eukaryota@Fungi	1240240	;cellular organisms;Eukaryota;Opisthokonta;Fungi;Microsporidia;Apansporoblastina;Tubulinosematidae;Anncaliia;Anncaliia algerae;Anncaliia algerae PRA109;
1.1	23	Minc18920	-	-	1e-05	-	-	-	1e-05	3e-05	594711481	41.07	M_rob	Metarhizium robertsii	@Eukaryota@Fungi	568076	;cellular organisms;Eukaryota;Opisthokonta;Fungi;Dikarya;Ascomycota;saccharomyceta;Pezizomycotina;leotiomyceta;sordariomyceta;Sordariomycetes;Hypocreomycetidae;Hypocreales;Clavicipitaceae;Metarhizium;Metarhizium robertsii;
1.1	20	Minc17899	-	-	1e-05	-	-	-	1e-05	3e-05	528315245	39.51	Schiz	Schizosaccharomyces cryophilus OY26	@Eukaryota@Fungi	653667	;cellular organisms;Eukaryota;Opisthokonta;Fungi;Dikarya;Ascomycota;Taphrinomycotina;Schizosaccharomycetes;Schizosaccharomycetales;Schizosaccharomycetaceae;Schizosaccharomyces;Schizosaccharomyces cryophilus;Schizosaccharomyces cryophilus OY26;
1.1	250	Minc11580	-	-	1e-38	-	-	1e-38	-	3e-38	302782407	74.12	S_moe	Selaginella moellendorffii	@Eukaryota@Viridiplantae	88036	;cellular organisms;Eukaryota;Viridiplantae;Streptophyta;Streptophytina;Embryophyta;Tracheophyta;Lycopodiopsida;Selaginellales;Selaginellaceae;Selaginella;Selaginella moellendorffii;
1.05	250	Minc08653	-	7e-17	-	-	-	-	-	2e-16	516216733	58.9	N_gil	Nocardiopsis gilva	@Bacteria	280236	;cellular organisms;Bacteria;Terrabacteria group;Actinobacteria;Actinobacteria;Streptosporangiales;Nocardiopsaceae;Nocardiopsis;Nocardiopsis gilva;
1.05	250	Minc04993	-	-	7e-39	-	-	7e-39	-	2e-38	302782407	75.29	S_moe	Selaginella moellendorffii	@Eukaryota@Viridiplantae	88036	;cellular organisms;Eukaryota;Viridiplantae;Streptophyta;Streptophytina;Embryophyta;Tracheophyta;Lycopodiopsida;Selaginellales;Selaginellaceae;Selaginella;Selaginella moellendorffii;
0.92	46	Minc15449	-	-	8e-07	-	-	8e-07	-	2e-06	612398373	24.76	B_pra	Bathycoccus prasinos	@Eukaryota@Viridiplantae	41875	;cellular organisms;Eukaryota;Viridiplantae;Chlorophyta;prasinophytes;Mamiellophyceae;Mamiellales;Bathycoccaceae;Bathycoccus;Bathycoccus prasinos;
0.92	251	Minc13304	-	-	8e-18	-	-	-	-	2e-17	470372091	25.47	Acant	Acanthamoeba castellanii str. Neff	@Eukaryota	1257118	;cellular organisms;Eukaryota;Amoebozoa;Discosea;Longamoebia;Centramoebida;Acanthamoebidae;Acanthamoeba;Acanthamoeba castellanii;Acanthamoeba castellanii str. Neff;
0.92	250	Minc11054	-	-	2e-09	-	-	-	2e-09	5e-09	552911334	35	Rhizo	Rhizophagus irregularis DAOM 181602	@Eukaryota@Fungi	747089	;cellular organisms;Eukaryota;Opisthokonta;Fungi;Mucoromycota;Glomeromycotina;Glomeromycetes;Glomerales;Glomeraceae;Rhizophagus;Rhizophagus irregularis;Rhizophagus irregularis DAOM 181602;
0.92	185	Minc17917	-	-	4e-06	-	-	4e-06	-	1e-05	361066485	44	P_rad	Pinus radiata	@Eukaryota@Viridiplantae	3347	;cellular organisms;Eukaryota;Viridiplantae;Streptophyta;Streptophytina;Embryophyta;Tracheophyta;Euphyllophyta;Spermatophyta;Acrogymnospermae;Pinidae;Pinales;Pinaceae;Pinus;Pinus;Pinus radiata;
0.92	42	Minc18143	-	-	4e-06	-	-	4e-06	-	1e-05	587930720	40.98	M_not	Morus notabilis	@Eukaryota@Viridiplantae	981085	;cellular organisms;Eukaryota;Viridiplantae;Streptophyta;Streptophytina;Embryophyta;Tracheophyta;Euphyllophyta;Spermatophyta;Magnoliophyta;Mesangiospermae;eudicotyledons;Gunneridae;Pentapetalae;rosids;fabids;Rosales;Moraceae;Morus;Morus notabilis;
0.92	140	Minc07422	-	8e-11	-	-	-	-	-	2e-10	575413305	32.31	Candi	Candidatus Entotheonella sp. TSY2	@Bacteria	1429439	;cellular organisms;Bacteria;Nitrospinae/Tectomicrobia group;Candidatus Tectomicrobia;Candidatus Entotheonella;Candidatus Entotheonella sp. TSY2;
0.92	236	Minc18100	-	-	4e-09	-	-	-	4e-09	1e-08	552911334	33.75	Rhizo	Rhizophagus irregularis DAOM 181602	@Eukaryota@Fungi	747089	;cellular organisms;Eukaryota;Opisthokonta;Fungi;Mucoromycota;Glomeromycotina;Glomeromycetes;Glomerales;Glomeraceae;Rhizophagus;Rhizophagus irregularis;Rhizophagus irregularis DAOM 181602;
0.92	24	Minc04656	-	-	8e-09	-	-	8e-09	-	2e-08	147807624	37.59	V_vin	Vitis vinifera	@Eukaryota@Viridiplantae	29760	;cellular organisms;Eukaryota;Viridiplantae;Streptophyta;Streptophytina;Embryophyta;Tracheophyta;Euphyllophyta;Spermatophyta;Magnoliophyta;Mesangiospermae;eudicotyledons;Gunneridae;Pentapetalae;rosids;rosids incertae sedis;Vitales;Vitaceae;Vitis;Vitis vinifera;
0.85	269	Minc05317	-	-	-	-	3e-16	-	-	7e-16	109255387	28.65	Chori	Choristoneura occidentalis granulovirus	@Viruses	364745	;Viruses;dsDNA viruses, no RNA stage;Baculoviridae;Betabaculovirus;unclassified Betabaculovirus;Choristoneura occidentalis granulovirus;
0.85	250	Minc15554	-	-	3e-10	-	-	-	-	7e-10	145495238	29.46	Param	Paramecium tetraurelia strain d4-2	@Eukaryota	412030	;cellular organisms;Eukaryota;Alveolata;Ciliophora;Intramacronucleata;Oligohymenophorea;Peniculida;Parameciidae;Paramecium;Paramecium tetraurelia;Paramecium tetraurelia strain d4-2;
0.8	31	Minc08917	-	-	9e-07	-	-	-	9e-07	2e-06	595441180	47.89	Rhizo	Rhizophagus irregularis DAOM 197198w	@Eukaryota@Fungi	1432141	;cellular organisms;Eukaryota;Opisthokonta;Fungi;Mucoromycota;Glomeromycotina;Glomeromycetes;Glomerales;Glomeraceae;Rhizophagus;Rhizophagus irregularis;Rhizophagus irregularis DAOM 197198w;
0.8	250	Minc11871	-	-	9e-15	-	-	-	9e-15	2e-14	170109753	42.86	Lacca	Laccaria bicolor S238N-H82	@Eukaryota@Fungi	486041	;cellular organisms;Eukaryota;Opisthokonta;Fungi;Dikarya;Basidiomycota;Agaricomycotina;Agaricomycetes;Agaricomycetidae;Agaricales;Tricholomataceae;Laccaria;Laccaria bicolor;Laccaria bicolor S238N-H82;
0.8	327	Minc07184	-	-	9e-17	-	-	-	9e-17	2e-16	269859278	48.72	Enter	Enterocytozoon bieneusi H348	@Eukaryota@Fungi	481877	;cellular organisms;Eukaryota;Opisthokonta;Fungi;Microsporidia;Apansporoblastina;Enterocytozoonidae;Enterocytozoon;Enterocytozoon bieneusi;Enterocytozoon bieneusi H348;
0.69	250	Minc15942	-	-	1e-10	-	-	-	1e-10	2e-10	552926240	44.71	Rhizo	Rhizophagus irregularis DAOM 181602	@Eukaryota@Fungi	747089	;cellular organisms;Eukaryota;Opisthokonta;Fungi;Mucoromycota;Glomeromycotina;Glomeromycetes;Glomerales;Glomeraceae;Rhizophagus;Rhizophagus irregularis;Rhizophagus irregularis DAOM 181602;
0.69	250	Minc13053	-	-	2e-21	-	-	-	2e-21	4e-21	511005261	38.66	Mucor	Mucor circinelloides f. circinelloides 1006PhL	@Eukaryota@Fungi	1220926	;cellular organisms;Eukaryota;Opisthokonta;Fungi;Mucoromycota;Mucoromycotina;Mucorales;Mucorineae;Mucoraceae;Mucor;Mucor circinelloides;Mucor circinelloides f. circinelloides;Mucor circinelloides f. circinelloides 1006PhL;
0.69	250	Minc05795	-	-	2e-21	-	-	-	-	4e-21	574984167	36.05	Plasm	Plasmodium falciparum MaliPS096_E11	@Eukaryota	1036727	;cellular organisms;Eukaryota;Alveolata;Apicomplexa;Aconoidasida;Haemosporida;Plasmodiidae;Plasmodium;Plasmodium (Laverania);Plasmodium falciparum;Plasmodium falciparum MaliPS096_E11;
0.69	250	Minc00561	-	-	2e-17	-	-	2e-17	-	4e-17	326498435	83.72	Horde	Hordeum vulgare subsp. vulgare	@Eukaryota@Viridiplantae	112509	;cellular organisms;Eukaryota;Viridiplantae;Streptophyta;Streptophytina;Embryophyta;Tracheophyta;Euphyllophyta;Spermatophyta;Magnoliophyta;Mesangiospermae;Liliopsida;Petrosaviidae;commelinids;Poales;Poaceae;BOP clade;Pooideae;Triticodae;Triticeae;Hordeinae;Hordeum;Hordeum vulgare;Hordeum vulgare subsp. vulgare;
0.69	250	Minc14977	-	2e-12	-	-	-	-	-	4e-12	640073676	75	Lebet	Lebetimonas sp. JH292	@Bacteria	990068	;cellular organisms;Bacteria;Proteobacteria;delta/epsilon subdivisions;Epsilonproteobacteria;Nautiliales;Nautiliaceae;Lebetimonas;Lebetimonas sp. JH292;
0.69	250	Minc18697a	-	1e-41	-	-	-	-	-	2e-41	503760955	34.19	Z_gal	Zobellia galactanivorans	@Bacteria	63186	;cellular organisms;Bacteria;FCB group;Bacteroidetes/Chlorobi group;Bacteroidetes;Flavobacteriia;Flavobacteriales;Flavobacteriaceae;Zobellia;Zobellia galactanivorans;
0.69	18	Minc17491	-	-	2e-06	-	-	-	-	4e-06	316997053	32.2	M_ova	Monosiga ovata	@Eukaryota	81526	;cellular organisms;Eukaryota;Opisthokonta;Choanoflagellida;Craspedida;Salpingoecidae;Monosiga;Monosiga ovata;
0.69	22	Minc07861a	-	-	1e-06	-	-	-	-	2e-06	316997053	32.2	M_ova	Monosiga ovata	@Eukaryota	81526	;cellular organisms;Eukaryota;Opisthokonta;Choanoflagellida;Craspedida;Salpingoecidae;Monosiga;Monosiga ovata;
0.69	250	Minc12636	-	1e-15	-	-	-	-	-	2e-15	488783006	44.33	T_pha	Treponema phagedenis	@Bacteria	162	;cellular organisms;Bacteria;Spirochaetes;Spirochaetia;Spirochaetales;Spirochaetaceae;Treponema;Treponema phagedenis;
0.69	250	Minc06052	-	-	4e-07	-	-	-	-	8e-07	627945202	28.75	F_alb	Fonticula alba	@Eukaryota	691883	;cellular organisms;Eukaryota;Opisthokonta;Nucleariidae and Fonticula group;Fonticula;Fonticula alba;
0.69	134	Minc18057	-	-	2e-07	-	-	-	2e-07	4e-07	552935005	34.52	Rhizo	Rhizophagus irregularis DAOM 181602	@Eukaryota@Fungi	747089	;cellular organisms;Eukaryota;Opisthokonta;Fungi;Mucoromycota;Glomeromycotina;Glomeromycetes;Glomerales;Glomeraceae;Rhizophagus;Rhizophagus irregularis;Rhizophagus irregularis DAOM 181602;
0.69	840	Minc14282	-	-	1e-11	-	-	-	1e-11	2e-11	511006503	37.27	Mucor	Mucor circinelloides f. circinelloides 1006PhL	@Eukaryota@Fungi	1220926	;cellular organisms;Eukaryota;Opisthokonta;Fungi;Mucoromycota;Mucoromycotina;Mucorales;Mucorineae;Mucoraceae;Mucor;Mucor circinelloides;Mucor circinelloides f. circinelloides;Mucor circinelloides f. circinelloides 1006PhL;
0.69	250	Minc19148	-	-	2e-12	-	-	2e-12	-	4e-12	302836075	50	Volvo	Volvox carteri f. nagariensis	@Eukaryota@Viridiplantae	3068	;cellular organisms;Eukaryota;Viridiplantae;Chlorophyta;Chlorophyceae;Chlamydomonadales;Volvocaceae;Volvox;Volvox carteri;Volvox carteri f. nagariensis;
0.69	252	Minc15928	-	1e-30	-	-	-	-	-	2e-30	489078813	41.98	M_odo	Myroides odoratus	@Bacteria	256	;cellular organisms;Bacteria;FCB group;Bacteroidetes/Chlorobi group;Bacteroidetes;Flavobacteriia;Flavobacteriales;Flavobacteriaceae;Myroides;Myroides odoratus;
0.69	250	Minc03527	-	-	1e-57	-	-	-	-	2e-57	545711725	37.91	G_sul	Galdieria sulphuraria	@Eukaryota	130081	;cellular organisms;Eukaryota;Rhodophyta;Bangiophyceae;Cyanidiales;Cyanidiaceae;Galdieria;Galdieria sulphuraria;
0.69	250	Minc04095	-	-	2e-17	-	-	2e-17	-	4e-17	326498435	83.72	Horde	Hordeum vulgare subsp. vulgare	@Eukaryota@Viridiplantae	112509	;cellular organisms;Eukaryota;Viridiplantae;Streptophyta;Streptophytina;Embryophyta;Tracheophyta;Euphyllophyta;Spermatophyta;Magnoliophyta;Mesangiospermae;Liliopsida;Petrosaviidae;commelinids;Poales;Poaceae;BOP clade;Pooideae;Triticodae;Triticeae;Hordeinae;Hordeum;Hordeum vulgare;Hordeum vulgare subsp. vulgare;
0.69	250	Minc02460	-	2e-14	-	-	-	-	-	4e-14	493705545	48.86	H_can	Helicobacter canadensis	@Bacteria	123841	;cellular organisms;Bacteria;Proteobacteria;delta/epsilon subdivisions;Epsilonproteobacteria;Campylobacterales;Helicobacteraceae;Helicobacter;Helicobacter canadensis;
0.69	250	Minc16878	-	-	3e-73	-	-	3e-73	-	6e-73	587865006	69.59	M_not	Morus notabilis	@Eukaryota@Viridiplantae	981085	;cellular organisms;Eukaryota;Viridiplantae;Streptophyta;Streptophytina;Embryophyta;Tracheophyta;Euphyllophyta;Spermatophyta;Magnoliophyta;Mesangiospermae;eudicotyledons;Gunneridae;Pentapetalae;rosids;fabids;Rosales;Moraceae;Morus;Morus notabilis;
0.69	104	Minc04880	-	-	2e-06	-	-	2e-06	-	4e-06	568825166	39.73	C_sin	Citrus sinensis	@Eukaryota@Viridiplantae	2711	;cellular organisms;Eukaryota;Viridiplantae;Streptophyta;Streptophytina;Embryophyta;Tracheophyta;Euphyllophyta;Spermatophyta;Magnoliophyta;Mesangiospermae;eudicotyledons;Gunneridae;Pentapetalae;rosids;malvids;Sapindales;Rutaceae;Aurantioideae;Citrus;Citrus sinensis;
0.69	59	Minc01863	-	-	1e-05	-	-	1e-05	-	2e-05	118489087	32.26	Popul	Populus trichocarpa x Populus deltoides	@Eukaryota@Viridiplantae	3695	;cellular organisms;Eukaryota;Viridiplantae;Streptophyta;Streptophytina;Embryophyta;Tracheophyta;Euphyllophyta;Spermatophyta;Magnoliophyta;Mesangiospermae;eudicotyledons;Gunneridae;Pentapetalae;rosids;fabids;Malpighiales;Salicaceae;Saliceae;Populus;Populus trichocarpa x Populus deltoides;
0.69	250	Minc17134	-	-	2e-25	-	-	-	2e-25	4e-25	19114652	45.19	Schiz	Schizosaccharomyces pombe 972h-	@Eukaryota@Fungi	284812	;cellular organisms;Eukaryota;Opisthokonta;Fungi;Dikarya;Ascomycota;Taphrinomycotina;Schizosaccharomycetes;Schizosaccharomycetales;Schizosaccharomycetaceae;Schizosaccharomyces;Schizosaccharomyces pombe;Schizosaccharomyces pombe 972h-;
0.69	5	Minc08431	-	-	0.0001	-	-	-	0.0001	0.0002	501304648	32.53	Pseud	Pseudozyma hubeiensis SY62	@Eukaryota@Fungi	1305764	;cellular organisms;Eukaryota;Opisthokonta;Fungi;Dikarya;Basidiomycota;Ustilaginomycotina;Ustilaginomycetes;Ustilaginales;Ustilaginaceae;Pseudozyma;Pseudozyma hubeiensis;Pseudozyma hubeiensis SY62;
0.69	5	Minc09462	-	-	0.0001	-	-	-	0.0001	0.0002	402467481	27.87	Edhaz	Edhazardia aedis USNM 41457	@Eukaryota@Fungi	1003232	;cellular organisms;Eukaryota;Opisthokonta;Fungi;Microsporidia;Microsporidia incertae sedis;Culicosporidae;Edhazardia;Edhazardia aedis;Edhazardia aedis USNM 41457;
0.69	250	Minc01193	-	-	2e-21	-	-	-	2e-21	4e-21	511005261	38.66	Mucor	Mucor circinelloides f. circinelloides 1006PhL	@Eukaryota@Fungi	1220926	;cellular organisms;Eukaryota;Opisthokonta;Fungi;Mucoromycota;Mucoromycotina;Mucorales;Mucorineae;Mucoraceae;Mucor;Mucor circinelloides;Mucor circinelloides f. circinelloides;Mucor circinelloides f. circinelloides 1006PhL;
0.69	192	Minc14012	-	-	1e-06	-	-	-	-	2e-06	325192190	47.83	Albug	Albugo laibachii Nc14	@Eukaryota	890382	;cellular organisms;Eukaryota;Stramenopiles;Oomycetes;Albuginales;Albuginaceae;Albugo;Albugo laibachii;Albugo laibachii Nc14;
0.59	449	Minc03491	-	5e-09	-	-	-	-	-	9e-09	551701816	46.88	E_col	Escherichia coli	@Bacteria	562	;cellular organisms;Bacteria;Proteobacteria;Gammaproteobacteria;Enterobacterales;Enterobacteriaceae;Escherichia;Escherichia coli;
0.56	250	Minc11285	-	-	4e-73	-	-	4e-73	-	7e-73	587865006	69.59	M_not	Morus notabilis	@Eukaryota@Viridiplantae	981085	;cellular organisms;Eukaryota;Viridiplantae;Streptophyta;Streptophytina;Embryophyta;Tracheophyta;Euphyllophyta;Spermatophyta;Magnoliophyta;Mesangiospermae;eudicotyledons;Gunneridae;Pentapetalae;rosids;fabids;Rosales;Moraceae;Morus;Morus notabilis;
0.51	250	Minc12596	-	-	6e-56	-	-	-	-	1e-55	330793119	70.77	D_pur	Dictyostelium purpureum	@Eukaryota	5786	;cellular organisms;Eukaryota;Amoebozoa;Mycetozoa;Dictyosteliida;Dictyostelium;Dictyostelium purpureum;
0.51	250	Minc03095	-	-	6e-08	-	-	6e-08	-	1e-07	357521767	28.33	M_tru	Medicago truncatula	@Eukaryota@Viridiplantae	3880	;cellular organisms;Eukaryota;Viridiplantae;Streptophyta;Streptophytina;Embryophyta;Tracheophyta;Euphyllophyta;Spermatophyta;Magnoliophyta;Mesangiospermae;eudicotyledons;Gunneridae;Pentapetalae;rosids;fabids;Fabales;Fabaceae;Papilionoideae;Trifolieae;Medicago;Medicago truncatula;
0.51	1765	Minc03921	-	3e-34	-	-	-	-	-	5e-34	522819164	37.35	S_cel	Sorangium cellulosum	@Bacteria	56	;cellular organisms;Bacteria;Proteobacteria;delta/epsilon subdivisions;Deltaproteobacteria;Myxococcales;Sorangiineae;Polyangiaceae;Sorangium;Sorangium cellulosum;
0.47	251	Minc14524	-	-	5e-17	-	-	-	5e-17	8e-17	576990955	37.96	Rhizo	Rhizoctonia solani AG-3 Rhs1AP	@Eukaryota@Fungi	1086054	;cellular organisms;Eukaryota;Opisthokonta;Fungi;Dikarya;Basidiomycota;Agaricomycotina;Agaricomycetes;Agaricomycetes incertae sedis;Cantharellales;Ceratobasidiaceae;Rhizoctonia;Rhizoctonia solani;Rhizoctonia solani AG-3;Rhizoctonia solani AG-3 Rhs1AP;
0.41	251	Minc16848	-	-	2e-56	-	-	-	-	3e-56	551584985	92.13	Emili	Emiliania huxleyi CCMP1516	@Eukaryota	280463	;cellular organisms;Eukaryota;Haptophyceae;Isochrysidales;Noelaerhabdaceae;Emiliania;Emiliania huxleyi;Emiliania huxleyi CCMP1516;
0.41	251	Minc04705	-	-	2e-12	-	-	2e-12	-	3e-12	302836075	50	Volvo	Volvox carteri f. nagariensis	@Eukaryota@Viridiplantae	3068	;cellular organisms;Eukaryota;Viridiplantae;Chlorophyta;Chlorophyceae;Chlamydomonadales;Volvocaceae;Volvox;Volvox carteri;Volvox carteri f. nagariensis;
0.41	253	Minc17347	-	-	2e-25	-	-	-	2e-25	3e-25	595436791	32.87	Rhizo	Rhizophagus irregularis DAOM 197198w	@Eukaryota@Fungi	1432141	;cellular organisms;Eukaryota;Opisthokonta;Fungi;Mucoromycota;Glomeromycotina;Glomeromycetes;Glomerales;Glomeraceae;Rhizophagus;Rhizophagus irregularis;Rhizophagus irregularis DAOM 197198w;
0.41	18	Minc07825	-	-	2e-05	-	-	2e-05	-	3e-05	565477055	48.98	C_rub	Capsella rubella	@Eukaryota@Viridiplantae	81985	;cellular organisms;Eukaryota;Viridiplantae;Streptophyta;Streptophytina;Embryophyta;Tracheophyta;Euphyllophyta;Spermatophyta;Magnoliophyta;Mesangiospermae;eudicotyledons;Gunneridae;Pentapetalae;rosids;malvids;Brassicales;Brassicaceae;Camelineae;Capsella;Capsella rubella;
0.36	69	Minc18072	-	7e-08	-	-	-	-	-	1e-07	489167499	26.99	A_van	Amycolatopsis vancoresmycina	@Bacteria	208444	;cellular organisms;Bacteria;Terrabacteria group;Actinobacteria;Actinobacteria;Pseudonocardiales;Pseudonocardiaceae;Amycolatopsis;Amycolatopsis vancoresmycina;
0.29	148	Minc00084	-	-	3e-09	-	-	-	-	4e-09	575002249	35.94	Plasm	Plasmodium falciparum CAMP/Malaysia	@Eukaryota	5835	;cellular organisms;Eukaryota;Alveolata;Apicomplexa;Aconoidasida;Haemosporida;Plasmodiidae;Plasmodium;Plasmodium (Laverania);Plasmodium falciparum;Plasmodium falciparum CAMP/Malaysia;
0.29	198	Minc16920	-	-	3e-07	-	-	3e-07	-	4e-07	567168383	38.14	E_sal	Eutrema salsugineum	@Eukaryota@Viridiplantae	72664	;cellular organisms;Eukaryota;Viridiplantae;Streptophyta;Streptophytina;Embryophyta;Tracheophyta;Euphyllophyta;Spermatophyta;Magnoliophyta;Mesangiospermae;eudicotyledons;Gunneridae;Pentapetalae;rosids;malvids;Brassicales;Brassicaceae;Eutremeae;Eutrema;Eutrema salsugineum;
0.22	11	Minc08579c	-	4e-06	-	-	-	-	-	5e-06	504063210	28.16	Marin	Marinitoga	@Bacteria	160798	;cellular organisms;Bacteria;Thermotogae;Thermotogae;Petrotogales;Petrotogaceae;Marinitoga;
0.22	5	Minc08780	-	-	4e-06	-	-	-	4e-06	5e-06	552937735	34.12	Rhizo	Rhizophagus irregularis DAOM 181602	@Eukaryota@Fungi	747089	;cellular organisms;Eukaryota;Opisthokonta;Fungi;Mucoromycota;Glomeromycotina;Glomeromycetes;Glomerales;Glomeraceae;Rhizophagus;Rhizophagus irregularis;Rhizophagus irregularis DAOM 181602;
0.22	250	Minc10069	-	-	4e-29	-	-	-	4e-29	5e-29	575474168	45.99	Batra	Batrachochytrium dendrobatidis JAM81	@Eukaryota@Fungi	684364	;cellular organisms;Eukaryota;Opisthokonta;Fungi;Chytridiomycota;Chytridiomycetes;Rhizophydiales;Rhizophydiales incertae sedis;Batrachochytrium;Batrachochytrium dendrobatidis;Batrachochytrium dendrobatidis JAM81;
0.22	250	Minc16614	-	-	8e-10	-	-	8e-10	-	1e-09	145344918	40.32	Ostre	Ostreococcus lucimarinus CCE9901	@Eukaryota@Viridiplantae	436017	;cellular organisms;Eukaryota;Viridiplantae;Chlorophyta;prasinophytes;Mamiellophyceae;Mamiellales;Bathycoccaceae;Ostreococcus;Ostreococcus 'lucimarinus';Ostreococcus lucimarinus CCE9901;
0.22	250	Minc13213	-	-	4e-18	-	-	4e-18	-	5e-18	255081989	31.37	M_com	Micromonas commoda	@Eukaryota@Viridiplantae	296587	;cellular organisms;Eukaryota;Viridiplantae;Chlorophyta;prasinophytes;Mamiellophyceae;Mamiellales;Mamiellaceae;Micromonas;Micromonas commoda;
0.22	250	Minc16919	-	-	4e-68	-	-	-	-	5e-68	514682428	67.12	S_ros	Salpingoeca rosetta	@Eukaryota	946362	;cellular organisms;Eukaryota;Opisthokonta;Choanoflagellida;Craspedida;Salpingoecidae;Salpingoeca;Salpingoeca rosetta;
0.22	10	Minc06074	-	-	8e-05	-	-	8e-05	-	0.0001	527200797	33.33	G_aur	Genlisea aurea	@Eukaryota@Viridiplantae	192259	;cellular organisms;Eukaryota;Viridiplantae;Streptophyta;Streptophytina;Embryophyta;Tracheophyta;Euphyllophyta;Spermatophyta;Magnoliophyta;Mesangiospermae;eudicotyledons;Gunneridae;Pentapetalae;asterids;lamiids;Lamiales;Lentibulariaceae;Genlisea;Genlisea aurea;
0.22	130	Minc07106	-	-	8e-15	-	-	-	8e-15	1e-14	552937489	22.5	Rhizo	Rhizophagus irregularis DAOM 181602	@Eukaryota@Fungi	747089	;cellular organisms;Eukaryota;Opisthokonta;Fungi;Mucoromycota;Glomeromycotina;Glomeromycetes;Glomerales;Glomeraceae;Rhizophagus;Rhizophagus irregularis;Rhizophagus irregularis DAOM 181602;
0.22	279	Minc01658	-	-	8e-28	-	-	-	8e-28	1e-27	531866960	24.59	Ophio	Ophiocordyceps sinensis CO18	@Eukaryota@Fungi	911162	;cellular organisms;Eukaryota;Opisthokonta;Fungi;Dikarya;Ascomycota;saccharomyceta;Pezizomycotina;leotiomyceta;sordariomyceta;Sordariomycetes;Hypocreomycetidae;Hypocreales;Ophiocordycipitaceae;Ophiocordyceps;Ophiocordyceps sinensis;Ophiocordyceps sinensis CO18;
0.18	251	Minc09593	-	-	5e-69	-	-	-	5e-69	6e-69	568463801	33.96	Agari	Agaricus bisporus var. bisporus H97	@Eukaryota@Fungi	936046	;cellular organisms;Eukaryota;Opisthokonta;Fungi;Dikarya;Basidiomycota;Agaricomycotina;Agaricomycetes;Agaricomycetidae;Agaricales;Agaricaceae;Agaricus;Agaricus bisporus;Agaricus bisporus var. bisporus;Agaricus bisporus var. bisporus H97;
0.15	264	Minc18665	-	-	6e-13	-	-	-	6e-13	7e-13	648156017	44.87	Galer	Galerina marginata CBS 339.88	@Eukaryota@Fungi	685588	;cellular organisms;Eukaryota;Opisthokonta;Fungi;Dikarya;Basidiomycota;Agaricomycotina;Agaricomycetes;Agaricomycetidae;Agaricales;Strophariaceae;Galerina;Galerina marginata;Galerina marginata CBS 339.88;
0.13	564	Minc06706a	-	-	7e-27	-	-	-	-	8e-27	340057209	42.7	Trypa	Trypanosoma vivax Y486	@Eukaryota	1055687	;cellular organisms;Eukaryota;Euglenozoa;Kinetoplastida;Trypanosomatidae;Trypanosoma;Duttonella;Trypanosoma vivax;Trypanosoma vivax Y486;
0.11	41	Minc06918	-	-	9e-05	-	-	-	-	0.0001	472458421	24.35	Entam	Entamoeba histolytica HM-3:IMSS	@Eukaryota	885315	;cellular organisms;Eukaryota;Amoebozoa;Archamoebae;Entamoebidae;Entamoeba;Entamoeba histolytica;Entamoeba histolytica HM-3:IMSS;
0.11	564	Minc16667a	-	-	9e-27	-	-	-	-	1e-26	340057209	42.7	Trypa	Trypanosoma vivax Y486	@Eukaryota	1055687	;cellular organisms;Eukaryota;Euglenozoa;Kinetoplastida;Trypanosomatidae;Trypanosoma;Duttonella;Trypanosoma vivax;Trypanosoma vivax Y486;
0	250	Minc03425	-	-	0	-	-	-	-	0	308459763	62.07	C_rem	Caenorhabditis remanei	@Eukaryota@Metazoa	31234	;cellular organisms;Eukaryota;Opisthokonta;Metazoa;Eumetazoa;Bilateria;Protostomia;Ecdysozoa;Nematoda;Chromadorea;Rhabditida;Rhabditoidea;Rhabditidae;Peloderinae;Caenorhabditis;Caenorhabditis remanei;
0	250	Minc03426	-	-	0	-	-	-	-	0	560118505	82.74	H_con	Haemonchus contortus	@Eukaryota@Metazoa	6289	;cellular organisms;Eukaryota;Opisthokonta;Metazoa;Eumetazoa;Bilateria;Protostomia;Ecdysozoa;Nematoda;Chromadorea;Rhabditida;Strongylida;Trichostrongyloidea;Haemonchidae;Haemonchinae;Haemonchus;Haemonchus contortus;
0	434	Minc03435a	-	-	0	-	-	-	-	0	193203354	51.91	C_ele	Caenorhabditis elegans	@Eukaryota@Metazoa	6239	;cellular organisms;Eukaryota;Opisthokonta;Metazoa;Eumetazoa;Bilateria;Protostomia;Ecdysozoa;Nematoda;Chromadorea;Rhabditida;Rhabditoidea;Rhabditidae;Peloderinae;Caenorhabditis;Caenorhabditis elegans;
0	277	Minc11272	-	-	0	-	-	-	0	0	309365042	66.89	C_bri	Caenorhabditis briggsae	@Eukaryota@Metazoa	6238	;cellular organisms;Eukaryota;Opisthokonta;Metazoa;Eumetazoa;Bilateria;Protostomia;Ecdysozoa;Nematoda;Chromadorea;Rhabditida;Rhabditoidea;Rhabditidae;Peloderinae;Caenorhabditis;Caenorhabditis briggsae;
0	250	Minc00863	-	-	0	-	-	-	-	0	560125103	62.9	H_con	Haemonchus contortus	@Eukaryota@Metazoa	6289	;cellular organisms;Eukaryota;Opisthokonta;Metazoa;Eumetazoa;Bilateria;Protostomia;Ecdysozoa;Nematoda;Chromadorea;Rhabditida;Strongylida;Trichostrongyloidea;Haemonchidae;Haemonchinae;Haemonchus;Haemonchus contortus;
0	1	Minc00119	-	-	-	-	-	-	-	-	-	-	-	-	-	-	-
0	250	Minc07543	-	-	0	-	-	-	-	0	312082520	66.21	L_loa	Loa loa	@Eukaryota@Metazoa	7209	;cellular organisms;Eukaryota;Opisthokonta;Metazoa;Eumetazoa;Bilateria;Protostomia;Ecdysozoa;Nematoda;Chromadorea;Spirurida;Filarioidea;Onchocercidae;Loa;Loa loa;
0	250	Minc07549	-	-	0	-	-	-	0	0	597834962	66.86	A_cey	Ancylostoma ceylanicum	@Eukaryota@Metazoa	53326	;cellular organisms;Eukaryota;Opisthokonta;Metazoa;Eumetazoa;Bilateria;Protostomia;Ecdysozoa;Nematoda;Chromadorea;Rhabditida;Strongylida;Ancylostomatoidea;Ancylostomatidae;Ancylostomatinae;Ancylostoma;Ancylostoma ceylanicum;
0	250	Minc08336	-	0	-	-	-	-	-	0	597834439	63.99	A_cey	Ancylostoma ceylanicum	@Eukaryota@Metazoa	53326	;cellular organisms;Eukaryota;Opisthokonta;Metazoa;Eumetazoa;Bilateria;Protostomia;Ecdysozoa;Nematoda;Chromadorea;Rhabditida;Strongylida;Ancylostomatoidea;Ancylostomatidae;Ancylostomatinae;Ancylostoma;Ancylostoma ceylanicum;
0	881	Minc11629	-	-	0	-	-	-	-	0	393905343	70.86	L_loa	Loa loa	@Eukaryota@Metazoa	7209	;cellular organisms;Eukaryota;Opisthokonta;Metazoa;Eumetazoa;Bilateria;Protostomia;Ecdysozoa;Nematoda;Chromadorea;Spirurida;Filarioidea;Onchocercidae;Loa;Loa loa;
0	250	Minc03157	-	-	0	-	-	0	-	0	170595600	80.4	B_mal	Brugia malayi	@Eukaryota@Metazoa	6279	;cellular organisms;Eukaryota;Opisthokonta;Metazoa;Eumetazoa;Bilateria;Protostomia;Ecdysozoa;Nematoda;Chromadorea;Spirurida;Filarioidea;Onchocercidae;Brugia;Brugia malayi;
0	250	Minc06464	-	-	0	-	-	-	0	0	597834962	65.67	A_cey	Ancylostoma ceylanicum	@Eukaryota@Metazoa	53326	;cellular organisms;Eukaryota;Opisthokonta;Metazoa;Eumetazoa;Bilateria;Protostomia;Ecdysozoa;Nematoda;Chromadorea;Rhabditida;Strongylida;Ancylostomatoidea;Ancylostomatidae;Ancylostomatinae;Ancylostoma;Ancylostoma ceylanicum;
0	250	Minc16146	-	0	-	-	-	-	-	0	393907209	64.73	L_loa	Loa loa	@Eukaryota@Metazoa	7209	;cellular organisms;Eukaryota;Opisthokonta;Metazoa;Eumetazoa;Bilateria;Protostomia;Ecdysozoa;Nematoda;Chromadorea;Spirurida;Filarioidea;Onchocercidae;Loa;Loa loa;
0	311	Minc13708	-	-	2e-10	-	-	-	-	2e-10	290973264	38.16	Naegl	Naegleria gruberi strain NEG-M	@Eukaryota	744533	;cellular organisms;Eukaryota;Heterolobosea;Schizopyrenida;Vahlkampfiidae;Naegleria;Naegleria gruberi;Naegleria gruberi strain NEG-M;
0	250	Minc18027	-	-	0	-	-	-	0	0	268576106	74.27	C_bri	Caenorhabditis briggsae	@Eukaryota@Metazoa	6238	;cellular organisms;Eukaryota;Opisthokonta;Metazoa;Eumetazoa;Bilateria;Protostomia;Ecdysozoa;Nematoda;Chromadorea;Rhabditida;Rhabditoidea;Rhabditidae;Peloderinae;Caenorhabditis;Caenorhabditis briggsae;
0	250	Minc17907	-	-	0	-	-	0	-	0	170591428	61.1	B_mal	Brugia malayi	@Eukaryota@Metazoa	6279	;cellular organisms;Eukaryota;Opisthokonta;Metazoa;Eumetazoa;Bilateria;Protostomia;Ecdysozoa;Nematoda;Chromadorea;Spirurida;Filarioidea;Onchocercidae;Brugia;Brugia malayi;
0	17	Minc10425	-	-	-	-	-	-	-	-	-	-	-	-	-	-	-
0	255	Minc16905a	-	-	0	-	-	-	-	0	170580360	59.55	B_mal	Brugia malayi	@Eukaryota@Metazoa	6279	;cellular organisms;Eukaryota;Opisthokonta;Metazoa;Eumetazoa;Bilateria;Protostomia;Ecdysozoa;Nematoda;Chromadorea;Spirurida;Filarioidea;Onchocercidae;Brugia;Brugia malayi;
0	251	Minc03570	-	-	0	-	-	-	-	0	393907993	60.19	L_loa	Loa loa	@Eukaryota@Metazoa	7209	;cellular organisms;Eukaryota;Opisthokonta;Metazoa;Eumetazoa;Bilateria;Protostomia;Ecdysozoa;Nematoda;Chromadorea;Spirurida;Filarioidea;Onchocercidae;Loa;Loa loa;
0	250	Minc18111a	-	-	0	-	-	-	0	0	560121758	87.08	H_con	Haemonchus contortus	@Eukaryota@Metazoa	6289	;cellular organisms;Eukaryota;Opisthokonta;Metazoa;Eumetazoa;Bilateria;Protostomia;Ecdysozoa;Nematoda;Chromadorea;Rhabditida;Strongylida;Trichostrongyloidea;Haemonchidae;Haemonchinae;Haemonchus;Haemonchus contortus;
0	2	Minc06131	-	-	-	-	-	-	-	-	-	-	-	-	-	-	-
0	250	Minc06133	-	-	0	-	-	0	-	0	393911374	47.08	L_loa	Loa loa	@Eukaryota@Metazoa	7209	;cellular organisms;Eukaryota;Opisthokonta;Metazoa;Eumetazoa;Bilateria;Protostomia;Ecdysozoa;Nematoda;Chromadorea;Spirurida;Filarioidea;Onchocercidae;Loa;Loa loa;
0	10	Minc14900	-	-	-	-	-	-	-	-	-	-	-	-	-	-	-
0	250	Minc00140a	-	-	0	-	-	-	-	0	439735	93.08	H_con	Haemonchus contortus	@Eukaryota@Metazoa	6289	;cellular organisms;Eukaryota;Opisthokonta;Metazoa;Eumetazoa;Bilateria;Protostomia;Ecdysozoa;Nematoda;Chromadorea;Rhabditida;Strongylida;Trichostrongyloidea;Haemonchidae;Haemonchinae;Haemonchus;Haemonchus contortus;
0	250	Minc00140b	-	-	0	-	-	-	-	0	439735	84.22	H_con	Haemonchus contortus	@Eukaryota@Metazoa	6289	;cellular organisms;Eukaryota;Opisthokonta;Metazoa;Eumetazoa;Bilateria;Protostomia;Ecdysozoa;Nematoda;Chromadorea;Rhabditida;Strongylida;Trichostrongyloidea;Haemonchidae;Haemonchinae;Haemonchus;Haemonchus contortus;
0	250	Minc11760a	-	-	0	-	-	-	-	0	439735	86.72	H_con	Haemonchus contortus	@Eukaryota@Metazoa	6289	;cellular organisms;Eukaryota;Opisthokonta;Metazoa;Eumetazoa;Bilateria;Protostomia;Ecdysozoa;Nematoda;Chromadorea;Rhabditida;Strongylida;Trichostrongyloidea;Haemonchidae;Haemonchinae;Haemonchus;Haemonchus contortus;
0	250	Minc11760b	-	-	0	-	-	-	-	0	160415869	83.91	C_cat	Cyathostomum catinatum	@Eukaryota@Metazoa	59891	;cellular organisms;Eukaryota;Opisthokonta;Metazoa;Eumetazoa;Bilateria;Protostomia;Ecdysozoa;Nematoda;Chromadorea;Rhabditida;Strongylida;Strongyloidea;Strongylidae;Cyathostominae;Cyathostomum;Cyathostomum catinatum;
0	250	Minc11760c	-	-	0	-	-	-	-	0	439735	90.21	H_con	Haemonchus contortus	@Eukaryota@Metazoa	6289	;cellular organisms;Eukaryota;Opisthokonta;Metazoa;Eumetazoa;Bilateria;Protostomia;Ecdysozoa;Nematoda;Chromadorea;Rhabditida;Strongylida;Trichostrongyloidea;Haemonchidae;Haemonchinae;Haemonchus;Haemonchus contortus;
0	250	Minc10173	-	-	0	-	-	0	-	0	597851032	83.33	A_cey	Ancylostoma ceylanicum	@Eukaryota@Metazoa	53326	;cellular organisms;Eukaryota;Opisthokonta;Metazoa;Eumetazoa;Bilateria;Protostomia;Ecdysozoa;Nematoda;Chromadorea;Rhabditida;Strongylida;Ancylostomatoidea;Ancylostomatidae;Ancylostomatinae;Ancylostoma;Ancylostoma ceylanicum;
0	253	Minc14747	-	-	0	-	-	-	-	0	393911234	59.84	L_loa	Loa loa	@Eukaryota@Metazoa	7209	;cellular organisms;Eukaryota;Opisthokonta;Metazoa;Eumetazoa;Bilateria;Protostomia;Ecdysozoa;Nematoda;Chromadorea;Spirurida;Filarioidea;Onchocercidae;Loa;Loa loa;
0	250	Minc10334	-	-	0	-	-	-	0	0	597840568	71.11	A_cey	Ancylostoma ceylanicum	@Eukaryota@Metazoa	53326	;cellular organisms;Eukaryota;Opisthokonta;Metazoa;Eumetazoa;Bilateria;Protostomia;Ecdysozoa;Nematoda;Chromadorea;Rhabditida;Strongylida;Ancylostomatoidea;Ancylostomatidae;Ancylostomatinae;Ancylostoma;Ancylostoma ceylanicum;
0	284	Minc16222	-	-	0	-	-	-	-	0	597872320	70.75	A_cey	Ancylostoma ceylanicum	@Eukaryota@Metazoa	53326	;cellular organisms;Eukaryota;Opisthokonta;Metazoa;Eumetazoa;Bilateria;Protostomia;Ecdysozoa;Nematoda;Chromadorea;Rhabditida;Strongylida;Ancylostomatoidea;Ancylostomatidae;Ancylostomatinae;Ancylostoma;Ancylostoma ceylanicum;
0	253	Minc14052	-	-	0	-	-	-	0	0	560125027	48.36	H_con	Haemonchus contortus	@Eukaryota@Metazoa	6289	;cellular organisms;Eukaryota;Opisthokonta;Metazoa;Eumetazoa;Bilateria;Protostomia;Ecdysozoa;Nematoda;Chromadorea;Rhabditida;Strongylida;Trichostrongyloidea;Haemonchidae;Haemonchinae;Haemonchus;Haemonchus contortus;
0	251	Minc07330	-	-	0	-	-	-	0	0	541047450	68.56	A_suu	Ascaris suum	@Eukaryota@Metazoa	6253	;cellular organisms;Eukaryota;Opisthokonta;Metazoa;Eumetazoa;Bilateria;Protostomia;Ecdysozoa;Nematoda;Chromadorea;Ascaridida;Ascaridoidea;Ascarididae;Ascaris;Ascaris suum;
0	250	Minc01008	-	-	-	-	2e-60	-	-	2e-60	5107569	84.4	H_sap	Homo sapiens	@Eukaryota@Metazoa	9606	;cellular organisms;Eukaryota;Opisthokonta;Metazoa;Eumetazoa;Bilateria;Deuterostomia;Chordata;Craniata;Vertebrata;Gnathostomata;Teleostomi;Euteleostomi;Sarcopterygii;Dipnotetrapodomorpha;Tetrapoda;Amniota;Mammalia;Theria;Eutheria;Boreoeutheria;Euarchontoglires;Primates;Haplorrhini;Simiiformes;Catarrhini;Hominoidea;Hominidae;Homininae;Homo;Homo sapiens;
0	250	Minc18367	-	-	0	-	-	0	-	0	393907075	89.01	L_loa	Loa loa	@Eukaryota@Metazoa	7209	;cellular organisms;Eukaryota;Opisthokonta;Metazoa;Eumetazoa;Bilateria;Protostomia;Ecdysozoa;Nematoda;Chromadorea;Spirurida;Filarioidea;Onchocercidae;Loa;Loa loa;
0	69	Minc06816	-	-	-	-	-	-	-	-	-	-	-	-	-	-	-
0	40	Minc08668	-	7e-11	-	-	-	-	-	7e-11	465956930	28.38	C_myd	Chelonia mydas	@Eukaryota@Metazoa	8469	;cellular organisms;Eukaryota;Opisthokonta;Metazoa;Eumetazoa;Bilateria;Deuterostomia;Chordata;Craniata;Vertebrata;Gnathostomata;Teleostomi;Euteleostomi;Sarcopterygii;Dipnotetrapodomorpha;Tetrapoda;Amniota;Sauropsida;Sauria;Archelosauria;Testudines;Cryptodira;Durocryptodira;Americhelydia;Chelonioidea;Cheloniidae;Chelonia;Chelonia mydas;
0	1	Minc04934	-	-	-	-	-	-	-	-	-	-	-	-	-	-	-
0	250	Minc04943	-	-	3e-25	-	-	-	3e-25	3e-25	530775135	72.6	Schiz	Schizosaccharomyces japonicus yFS275	@Eukaryota@Fungi	402676	;cellular organisms;Eukaryota;Opisthokonta;Fungi;Dikarya;Ascomycota;Taphrinomycotina;Schizosaccharomycetes;Schizosaccharomycetales;Schizosaccharomycetaceae;Schizosaccharomyces;Schizosaccharomyces japonicus;Schizosaccharomyces japonicus yFS275;
0	1	Minc12617	-	-	-	-	-	-	-	-	-	-	-	-	-	-	-
0	251	Minc06711	-	-	0	-	-	-	-	0	309355736	73.74	C_bri	Caenorhabditis briggsae	@Eukaryota@Metazoa	6238	;cellular organisms;Eukaryota;Opisthokonta;Metazoa;Eumetazoa;Bilateria;Protostomia;Ecdysozoa;Nematoda;Chromadorea;Rhabditida;Rhabditoidea;Rhabditidae;Peloderinae;Caenorhabditis;Caenorhabditis briggsae;
0	25	Minc04584	-	-	-	-	-	-	-	-	-	-	-	-	-	-	-
0	250	Minc07396	-	-	0	-	-	-	-	0	541048343	70.46	A_suu	Ascaris suum	@Eukaryota@Metazoa	6253	;cellular organisms;Eukaryota;Opisthokonta;Metazoa;Eumetazoa;Bilateria;Protostomia;Ecdysozoa;Nematoda;Chromadorea;Ascaridida;Ascaridoidea;Ascarididae;Ascaris;Ascaris suum;
0	1	Minc11857a	-	-	-	-	-	-	-	-	-	-	-	-	-	-	-
0	1	Minc11857b	-	-	-	-	-	-	-	-	-	-	-	-	-	-	-
0	1	Minc11857d	-	-	-	-	-	-	-	-	-	-	-	-	-	-	-
0	1	Minc11857e	-	-	-	-	-	-	-	-	-	-	-	-	-	-	-
0	1	Minc11859	-	-	-	-	-	-	-	-	-	-	-	-	-	-	-
0	250	Minc05465	-	-	0	-	-	-	-	0	541039928	52.66	A_suu	Ascaris suum	@Eukaryota@Metazoa	6253	;cellular organisms;Eukaryota;Opisthokonta;Metazoa;Eumetazoa;Bilateria;Protostomia;Ecdysozoa;Nematoda;Chromadorea;Ascaridida;Ascaridoidea;Ascarididae;Ascaris;Ascaris suum;
0	252	Minc05472a	-	-	0	-	-	-	0	0	560121867	65.27	H_con	Haemonchus contortus	@Eukaryota@Metazoa	6289	;cellular organisms;Eukaryota;Opisthokonta;Metazoa;Eumetazoa;Bilateria;Protostomia;Ecdysozoa;Nematoda;Chromadorea;Rhabditida;Strongylida;Trichostrongyloidea;Haemonchidae;Haemonchinae;Haemonchus;Haemonchus contortus;
0	252	Minc05472b	-	-	0	-	-	-	0	0	560121867	65.25	H_con	Haemonchus contortus	@Eukaryota@Metazoa	6289	;cellular organisms;Eukaryota;Opisthokonta;Metazoa;Eumetazoa;Bilateria;Protostomia;Ecdysozoa;Nematoda;Chromadorea;Rhabditida;Strongylida;Trichostrongyloidea;Haemonchidae;Haemonchinae;Haemonchus;Haemonchus contortus;
0	250	Minc01141	-	-	0	-	-	0	-	0	393908216	87.56	L_loa	Loa loa	@Eukaryota@Metazoa	7209	;cellular organisms;Eukaryota;Opisthokonta;Metazoa;Eumetazoa;Bilateria;Protostomia;Ecdysozoa;Nematoda;Chromadorea;Spirurida;Filarioidea;Onchocercidae;Loa;Loa loa;
0	252	Minc01142	-	-	0	-	-	-	0	0	170596978	52.62	B_mal	Brugia malayi	@Eukaryota@Metazoa	6279	;cellular organisms;Eukaryota;Opisthokonta;Metazoa;Eumetazoa;Bilateria;Protostomia;Ecdysozoa;Nematoda;Chromadorea;Spirurida;Filarioidea;Onchocercidae;Brugia;Brugia malayi;
0	250	Minc01155	-	-	0	-	-	0	-	0	541044204	57.41	A_suu	Ascaris suum	@Eukaryota@Metazoa	6253	;cellular organisms;Eukaryota;Opisthokonta;Metazoa;Eumetazoa;Bilateria;Protostomia;Ecdysozoa;Nematoda;Chromadorea;Ascaridida;Ascaridoidea;Ascarididae;Ascaris;Ascaris suum;
0	713	Minc01164	-	-	0	-	-	-	0	0	597875905	58.36	A_cey	Ancylostoma ceylanicum	@Eukaryota@Metazoa	53326	;cellular organisms;Eukaryota;Opisthokonta;Metazoa;Eumetazoa;Bilateria;Protostomia;Ecdysozoa;Nematoda;Chromadorea;Rhabditida;Strongylida;Ancylostomatoidea;Ancylostomatidae;Ancylostomatinae;Ancylostoma;Ancylostoma ceylanicum;
0	250	Minc13172	-	0	-	-	-	-	-	0	560120210	75.57	H_con	Haemonchus contortus	@Eukaryota@Metazoa	6289	;cellular organisms;Eukaryota;Opisthokonta;Metazoa;Eumetazoa;Bilateria;Protostomia;Ecdysozoa;Nematoda;Chromadorea;Rhabditida;Strongylida;Trichostrongyloidea;Haemonchidae;Haemonchinae;Haemonchus;Haemonchus contortus;
0	250	Minc11060	-	-	0	-	-	0	-	0	560119034	57.02	H_con	Haemonchus contortus	@Eukaryota@Metazoa	6289	;cellular organisms;Eukaryota;Opisthokonta;Metazoa;Eumetazoa;Bilateria;Protostomia;Ecdysozoa;Nematoda;Chromadorea;Rhabditida;Strongylida;Trichostrongyloidea;Haemonchidae;Haemonchinae;Haemonchus;Haemonchus contortus;
0	250	Minc11076	-	-	0	-	-	-	0	0	541048574	72.55	A_suu	Ascaris suum	@Eukaryota@Metazoa	6253	;cellular organisms;Eukaryota;Opisthokonta;Metazoa;Eumetazoa;Bilateria;Protostomia;Ecdysozoa;Nematoda;Chromadorea;Ascaridida;Ascaridoidea;Ascarididae;Ascaris;Ascaris suum;
0	250	Minc01923	-	-	0	-	-	-	-	0	402594241	68.1	W_ban	Wuchereria bancrofti	@Eukaryota@Metazoa	6293	;cellular organisms;Eukaryota;Opisthokonta;Metazoa;Eumetazoa;Bilateria;Protostomia;Ecdysozoa;Nematoda;Chromadorea;Spirurida;Filarioidea;Onchocercidae;Wuchereria;Wuchereria bancrofti;
0	250	Minc01930	-	-	0	-	-	-	0	0	568292290	84.8	N_ame	Necator americanus	@Eukaryota@Metazoa	51031	;cellular organisms;Eukaryota;Opisthokonta;Metazoa;Eumetazoa;Bilateria;Protostomia;Ecdysozoa;Nematoda;Chromadorea;Rhabditida;Strongylida;Ancylostomatoidea;Ancylostomatidae;Bunostominae;Necator;Necator americanus;
0	587	Minc01947	-	-	0	-	-	-	0	0	170578894	69.35	B_mal	Brugia malayi	@Eukaryota@Metazoa	6279	;cellular organisms;Eukaryota;Opisthokonta;Metazoa;Eumetazoa;Bilateria;Protostomia;Ecdysozoa;Nematoda;Chromadorea;Spirurida;Filarioidea;Onchocercidae;Brugia;Brugia malayi;
0	255	Minc00523	-	-	0	-	-	-	-	0	402591154	59.61	W_ban	Wuchereria bancrofti	@Eukaryota@Metazoa	6293	;cellular organisms;Eukaryota;Opisthokonta;Metazoa;Eumetazoa;Bilateria;Protostomia;Ecdysozoa;Nematoda;Chromadorea;Spirurida;Filarioidea;Onchocercidae;Wuchereria;Wuchereria bancrofti;
0	269	Minc00536	-	-	0	-	-	-	-	0	393907054	45.59	L_loa	Loa loa	@Eukaryota@Metazoa	7209	;cellular organisms;Eukaryota;Opisthokonta;Metazoa;Eumetazoa;Bilateria;Protostomia;Ecdysozoa;Nematoda;Chromadorea;Spirurida;Filarioidea;Onchocercidae;Loa;Loa loa;
0	250	Minc00559	-	-	0	-	-	-	-	0	341884100	46.78	C_bre	Caenorhabditis brenneri	@Eukaryota@Metazoa	135651	;cellular organisms;Eukaryota;Opisthokonta;Metazoa;Eumetazoa;Bilateria;Protostomia;Ecdysozoa;Nematoda;Chromadorea;Rhabditida;Rhabditoidea;Rhabditidae;Peloderinae;Caenorhabditis;Caenorhabditis brenneri;
0	250	Minc00575	-	-	0	-	-	-	-	0	541046493	66.32	A_suu	Ascaris suum	@Eukaryota@Metazoa	6253	;cellular organisms;Eukaryota;Opisthokonta;Metazoa;Eumetazoa;Bilateria;Protostomia;Ecdysozoa;Nematoda;Chromadorea;Ascaridida;Ascaridoidea;Ascarididae;Ascaris;Ascaris suum;
0	250	Minc06538	-	-	0	-	-	-	-	0	541042301	66.05	A_suu	Ascaris suum	@Eukaryota@Metazoa	6253	;cellular organisms;Eukaryota;Opisthokonta;Metazoa;Eumetazoa;Bilateria;Protostomia;Ecdysozoa;Nematoda;Chromadorea;Ascaridida;Ascaridoidea;Ascarididae;Ascaris;Ascaris suum;
0	11	Minc02656	-	3e-06	-	-	-	-	-	3e-06	591376177	46.79	C_myd	Chelonia mydas	@Eukaryota@Metazoa	8469	;cellular organisms;Eukaryota;Opisthokonta;Metazoa;Eumetazoa;Bilateria;Deuterostomia;Chordata;Craniata;Vertebrata;Gnathostomata;Teleostomi;Euteleostomi;Sarcopterygii;Dipnotetrapodomorpha;Tetrapoda;Amniota;Sauropsida;Sauria;Archelosauria;Testudines;Cryptodira;Durocryptodira;Americhelydia;Chelonioidea;Cheloniidae;Chelonia;Chelonia mydas;
0	1	Minc13218b	-	-	-	-	-	-	-	-	-	-	-	-	-	-	-
0	250	Minc07985	-	-	0	-	-	0	-	0	312088402	55.03	L_loa	Loa loa	@Eukaryota@Metazoa	7209	;cellular organisms;Eukaryota;Opisthokonta;Metazoa;Eumetazoa;Bilateria;Protostomia;Ecdysozoa;Nematoda;Chromadorea;Spirurida;Filarioidea;Onchocercidae;Loa;Loa loa;
0	250	Minc08918	-	-	0	-	-	-	-	0	388069	91.03	T_col	Trichostrongylus colubriformis	@Eukaryota@Metazoa	6319	;cellular organisms;Eukaryota;Opisthokonta;Metazoa;Eumetazoa;Bilateria;Protostomia;Ecdysozoa;Nematoda;Chromadorea;Rhabditida;Strongylida;Trichostrongyloidea;Trichostrongylidae;Trichostrongylinae;Trichostrongylus;Trichostrongylus colubriformis;
0	252	Minc04430	-	-	0	-	-	-	-	0	560118420	72.71	H_con	Haemonchus contortus	@Eukaryota@Metazoa	6289	;cellular organisms;Eukaryota;Opisthokonta;Metazoa;Eumetazoa;Bilateria;Protostomia;Ecdysozoa;Nematoda;Chromadorea;Rhabditida;Strongylida;Trichostrongyloidea;Haemonchidae;Haemonchinae;Haemonchus;Haemonchus contortus;
0	1	Minc04457	-	-	-	-	-	-	-	-	-	-	-	-	-	-	-
0	354	Minc10906	-	-	9e-13	-	-	-	9e-13	9e-13	358055058	41.38	Mixia	Mixia osmundae IAM 14324	@Eukaryota@Fungi	764103	;cellular organisms;Eukaryota;Opisthokonta;Fungi;Dikarya;Basidiomycota;Pucciniomycotina;Mixiomycetes;Mixiales;Mixiaceae;Mixia;Mixia osmundae;Mixia osmundae IAM 14324;
0	441	Minc11011	-	-	0	-	-	-	0	0	541039160	62.3	A_suu	Ascaris suum	@Eukaryota@Metazoa	6253	;cellular organisms;Eukaryota;Opisthokonta;Metazoa;Eumetazoa;Bilateria;Protostomia;Ecdysozoa;Nematoda;Chromadorea;Ascaridida;Ascaridoidea;Ascarididae;Ascaris;Ascaris suum;
0	10	Minc18500	-	-	-	-	-	-	-	-	-	-	-	-	-	-	-
0	9	Minc18501	-	-	-	-	-	-	-	-	-	-	-	-	-	-	-
0	11	Minc18502	-	-	-	-	-	-	-	-	-	-	-	-	-	-	-
0	250	Minc10294a	-	-	0	-	-	-	0	0	170577529	93.88	B_mal	Brugia malayi	@Eukaryota@Metazoa	6279	;cellular organisms;Eukaryota;Opisthokonta;Metazoa;Eumetazoa;Bilateria;Protostomia;Ecdysozoa;Nematoda;Chromadorea;Spirurida;Filarioidea;Onchocercidae;Brugia;Brugia malayi;
0	250	Minc10294b	-	-	0	-	-	-	0	0	170577529	90.27	B_mal	Brugia malayi	@Eukaryota@Metazoa	6279	;cellular organisms;Eukaryota;Opisthokonta;Metazoa;Eumetazoa;Bilateria;Protostomia;Ecdysozoa;Nematoda;Chromadorea;Spirurida;Filarioidea;Onchocercidae;Brugia;Brugia malayi;
0	251	Minc17197	-	-	0	-	-	-	-	0	170583127	54.24	B_mal	Brugia malayi	@Eukaryota@Metazoa	6279	;cellular organisms;Eukaryota;Opisthokonta;Metazoa;Eumetazoa;Bilateria;Protostomia;Ecdysozoa;Nematoda;Chromadorea;Spirurida;Filarioidea;Onchocercidae;Brugia;Brugia malayi;
0	250	Minc13584	-	2e-09	-	-	-	-	-	2e-09	478259114	26.2	D_pon	Dendroctonus ponderosae	@Eukaryota@Metazoa	77166	;cellular organisms;Eukaryota;Opisthokonta;Metazoa;Eumetazoa;Bilateria;Protostomia;Ecdysozoa;Panarthropoda;Arthropoda;Mandibulata;Pancrustacea;Hexapoda;Insecta;Dicondylia;Pterygota;Neoptera;Holometabola;Coleoptera;Polyphaga;Cucujiformia;Curculionoidea;Curculionidae;Scolytinae;Dendroctonus;Dendroctonus ponderosae;
0	250	Minc14633	-	-	0	-	-	-	-	0	597837642	52.68	A_cey	Ancylostoma ceylanicum	@Eukaryota@Metazoa	53326	;cellular organisms;Eukaryota;Opisthokonta;Metazoa;Eumetazoa;Bilateria;Protostomia;Ecdysozoa;Nematoda;Chromadorea;Rhabditida;Strongylida;Ancylostomatoidea;Ancylostomatidae;Ancylostomatinae;Ancylostoma;Ancylostoma ceylanicum;
0	1	Minc08401	-	-	-	-	-	-	-	-	-	-	-	-	-	-	-
0	250	Minc12865	-	-	0	-	-	-	-	0	560134738	69.29	H_con	Haemonchus contortus	@Eukaryota@Metazoa	6289	;cellular organisms;Eukaryota;Opisthokonta;Metazoa;Eumetazoa;Bilateria;Protostomia;Ecdysozoa;Nematoda;Chromadorea;Rhabditida;Strongylida;Trichostrongyloidea;Haemonchidae;Haemonchinae;Haemonchus;Haemonchus contortus;
0	250	Minc17314	-	-	0	-	-	-	0	0	1350745	81.61	T_can	Toxocara canis	@Eukaryota@Metazoa	6265	;cellular organisms;Eukaryota;Opisthokonta;Metazoa;Eumetazoa;Bilateria;Protostomia;Ecdysozoa;Nematoda;Chromadorea;Ascaridida;Ascaridoidea;Toxocaridae;Toxocara;Toxocara canis;
0	5	Minc16054	-	-	-	-	-	-	-	-	-	-	-	-	-	-	-
0	250	Minc12400	-	-	0	-	-	-	-	0	560120601	79.65	H_con	Haemonchus contortus	@Eukaryota@Metazoa	6289	;cellular organisms;Eukaryota;Opisthokonta;Metazoa;Eumetazoa;Bilateria;Protostomia;Ecdysozoa;Nematoda;Chromadorea;Rhabditida;Strongylida;Trichostrongyloidea;Haemonchidae;Haemonchinae;Haemonchus;Haemonchus contortus;
0	250	Minc16756	-	-	0	-	-	-	0	0	71986308	65.3	C_ele	Caenorhabditis elegans	@Eukaryota@Metazoa	6239	;cellular organisms;Eukaryota;Opisthokonta;Metazoa;Eumetazoa;Bilateria;Protostomia;Ecdysozoa;Nematoda;Chromadorea;Rhabditida;Rhabditoidea;Rhabditidae;Peloderinae;Caenorhabditis;Caenorhabditis elegans;
0	250	Minc12185	-	-	0	-	-	-	-	0	597851269	58.42	A_cey	Ancylostoma ceylanicum	@Eukaryota@Metazoa	53326	;cellular organisms;Eukaryota;Opisthokonta;Metazoa;Eumetazoa;Bilateria;Protostomia;Ecdysozoa;Nematoda;Chromadorea;Rhabditida;Strongylida;Ancylostomatoidea;Ancylostomatidae;Ancylostomatinae;Ancylostoma;Ancylostoma ceylanicum;
0	250	Minc05045	-	-	0	-	-	-	0	0	597862988	64.88	A_cey	Ancylostoma ceylanicum	@Eukaryota@Metazoa	53326	;cellular organisms;Eukaryota;Opisthokonta;Metazoa;Eumetazoa;Bilateria;Protostomia;Ecdysozoa;Nematoda;Chromadorea;Rhabditida;Strongylida;Ancylostomatoidea;Ancylostomatidae;Ancylostomatinae;Ancylostoma;Ancylostoma ceylanicum;
0	13	Minc05052	-	-	-	-	-	-	-	-	-	-	-	-	-	-	-
0	256	Minc13862a	-	-	0	-	-	-	-	0	170580360	62.54	B_mal	Brugia malayi	@Eukaryota@Metazoa	6279	;cellular organisms;Eukaryota;Opisthokonta;Metazoa;Eumetazoa;Bilateria;Protostomia;Ecdysozoa;Nematoda;Chromadorea;Spirurida;Filarioidea;Onchocercidae;Brugia;Brugia malayi;
0	256	Minc13862c	-	-	0	-	-	-	-	0	170580360	62.54	B_mal	Brugia malayi	@Eukaryota@Metazoa	6279	;cellular organisms;Eukaryota;Opisthokonta;Metazoa;Eumetazoa;Bilateria;Protostomia;Ecdysozoa;Nematoda;Chromadorea;Spirurida;Filarioidea;Onchocercidae;Brugia;Brugia malayi;
0	250	Minc13862d	-	-	0	-	-	-	-	0	170580360	64.04	B_mal	Brugia malayi	@Eukaryota@Metazoa	6279	;cellular organisms;Eukaryota;Opisthokonta;Metazoa;Eumetazoa;Bilateria;Protostomia;Ecdysozoa;Nematoda;Chromadorea;Spirurida;Filarioidea;Onchocercidae;Brugia;Brugia malayi;
0	250	Minc18225	-	-	0	-	-	-	-	0	541044562	66.27	A_suu	Ascaris suum	@Eukaryota@Metazoa	6253	;cellular organisms;Eukaryota;Opisthokonta;Metazoa;Eumetazoa;Bilateria;Protostomia;Ecdysozoa;Nematoda;Chromadorea;Ascaridida;Ascaridoidea;Ascarididae;Ascaris;Ascaris suum;
0	288	Minc02375	-	-	0	-	-	-	-	0	597894229	68.19	A_cey	Ancylostoma ceylanicum	@Eukaryota@Metazoa	53326	;cellular organisms;Eukaryota;Opisthokonta;Metazoa;Eumetazoa;Bilateria;Protostomia;Ecdysozoa;Nematoda;Chromadorea;Rhabditida;Strongylida;Ancylostomatoidea;Ancylostomatidae;Ancylostomatinae;Ancylostoma;Ancylostoma ceylanicum;
0	250	Minc17989	-	-	0	-	-	-	-	0	560117521	77.72	H_con	Haemonchus contortus	@Eukaryota@Metazoa	6289	;cellular organisms;Eukaryota;Opisthokonta;Metazoa;Eumetazoa;Bilateria;Protostomia;Ecdysozoa;Nematoda;Chromadorea;Rhabditida;Strongylida;Trichostrongyloidea;Haemonchidae;Haemonchinae;Haemonchus;Haemonchus contortus;
0	251	Minc16209	-	-	0	-	-	-	0	0	597844585	73.67	A_cey	Ancylostoma ceylanicum	@Eukaryota@Metazoa	53326	;cellular organisms;Eukaryota;Opisthokonta;Metazoa;Eumetazoa;Bilateria;Protostomia;Ecdysozoa;Nematoda;Chromadorea;Rhabditida;Strongylida;Ancylostomatoidea;Ancylostomatidae;Ancylostomatinae;Ancylostoma;Ancylostoma ceylanicum;
0	251	Minc18246	-	0	-	-	-	-	-	0	560121748	65.38	H_con	Haemonchus contortus	@Eukaryota@Metazoa	6289	;cellular organisms;Eukaryota;Opisthokonta;Metazoa;Eumetazoa;Bilateria;Protostomia;Ecdysozoa;Nematoda;Chromadorea;Rhabditida;Strongylida;Trichostrongyloidea;Haemonchidae;Haemonchinae;Haemonchus;Haemonchus contortus;
0	250	Minc08764a	-	-	0	-	-	-	-	0	439735	93.39	H_con	Haemonchus contortus	@Eukaryota@Metazoa	6289	;cellular organisms;Eukaryota;Opisthokonta;Metazoa;Eumetazoa;Bilateria;Protostomia;Ecdysozoa;Nematoda;Chromadorea;Rhabditida;Strongylida;Trichostrongyloidea;Haemonchidae;Haemonchinae;Haemonchus;Haemonchus contortus;
0	250	Minc08764b	-	-	0	-	-	-	-	0	160415869	91.49	C_cat	Cyathostomum catinatum	@Eukaryota@Metazoa	59891	;cellular organisms;Eukaryota;Opisthokonta;Metazoa;Eumetazoa;Bilateria;Protostomia;Ecdysozoa;Nematoda;Chromadorea;Rhabditida;Strongylida;Strongyloidea;Strongylidae;Cyathostominae;Cyathostomum;Cyathostomum catinatum;
0	250	Minc05914	-	-	0	-	-	-	-	0	560135801	62.84	H_con	Haemonchus contortus	@Eukaryota@Metazoa	6289	;cellular organisms;Eukaryota;Opisthokonta;Metazoa;Eumetazoa;Bilateria;Protostomia;Ecdysozoa;Nematoda;Chromadorea;Rhabditida;Strongylida;Trichostrongyloidea;Haemonchidae;Haemonchinae;Haemonchus;Haemonchus contortus;
0	250	Minc02994	-	-	0	-	-	0	-	0	393911374	46.99	L_loa	Loa loa	@Eukaryota@Metazoa	7209	;cellular organisms;Eukaryota;Opisthokonta;Metazoa;Eumetazoa;Bilateria;Protostomia;Ecdysozoa;Nematoda;Chromadorea;Spirurida;Filarioidea;Onchocercidae;Loa;Loa loa;
0	1	Minc16682	-	-	-	-	-	-	-	-	-	-	-	-	-	-	-
0	250	Minc15288	-	-	0	-	-	-	-	0	541045983	67.88	A_suu	Ascaris suum	@Eukaryota@Metazoa	6253	;cellular organisms;Eukaryota;Opisthokonta;Metazoa;Eumetazoa;Bilateria;Protostomia;Ecdysozoa;Nematoda;Chromadorea;Ascaridida;Ascaridoidea;Ascarididae;Ascaris;Ascaris suum;
0	4	Minc04910	-	-	-	-	-	-	-	-	-	-	-	-	-	-	-
0	250	Minc04921a	-	-	0	-	-	-	-	0	541045299	64	A_suu	Ascaris suum	@Eukaryota@Metazoa	6253	;cellular organisms;Eukaryota;Opisthokonta;Metazoa;Eumetazoa;Bilateria;Protostomia;Ecdysozoa;Nematoda;Chromadorea;Ascaridida;Ascaridoidea;Ascarididae;Ascaris;Ascaris suum;
0	251	Minc16846	-	-	0	-	-	-	-	0	541044386	49.6	A_suu	Ascaris suum	@Eukaryota@Metazoa	6253	;cellular organisms;Eukaryota;Opisthokonta;Metazoa;Eumetazoa;Bilateria;Protostomia;Ecdysozoa;Nematoda;Chromadorea;Ascaridida;Ascaridoidea;Ascarididae;Ascaris;Ascaris suum;
0	250	Minc17447	-	-	0	-	-	-	-	0	170583206	63.66	B_mal	Brugia malayi	@Eukaryota@Metazoa	6279	;cellular organisms;Eukaryota;Opisthokonta;Metazoa;Eumetazoa;Bilateria;Protostomia;Ecdysozoa;Nematoda;Chromadorea;Spirurida;Filarioidea;Onchocercidae;Brugia;Brugia malayi;
0	250	Minc03120	-	-	0	-	-	-	-	0	560115287	66.32	H_con	Haemonchus contortus	@Eukaryota@Metazoa	6289	;cellular organisms;Eukaryota;Opisthokonta;Metazoa;Eumetazoa;Bilateria;Protostomia;Ecdysozoa;Nematoda;Chromadorea;Rhabditida;Strongylida;Trichostrongyloidea;Haemonchidae;Haemonchinae;Haemonchus;Haemonchus contortus;
0	250	Minc15208	-	0	-	-	-	-	-	0	341896772	64.57	C_bre	Caenorhabditis brenneri	@Eukaryota@Metazoa	135651	;cellular organisms;Eukaryota;Opisthokonta;Metazoa;Eumetazoa;Bilateria;Protostomia;Ecdysozoa;Nematoda;Chromadorea;Rhabditida;Rhabditoidea;Rhabditidae;Peloderinae;Caenorhabditis;Caenorhabditis brenneri;
0	250	Minc09712	-	0	-	-	-	-	-	0	597882297	81.37	A_cey	Ancylostoma ceylanicum	@Eukaryota@Metazoa	53326	;cellular organisms;Eukaryota;Opisthokonta;Metazoa;Eumetazoa;Bilateria;Protostomia;Ecdysozoa;Nematoda;Chromadorea;Rhabditida;Strongylida;Ancylostomatoidea;Ancylostomatidae;Ancylostomatinae;Ancylostoma;Ancylostoma ceylanicum;
0	748	Minc09721	-	-	0	-	-	-	-	0	393907466	50.66	L_loa	Loa loa	@Eukaryota@Metazoa	7209	;cellular organisms;Eukaryota;Opisthokonta;Metazoa;Eumetazoa;Bilateria;Protostomia;Ecdysozoa;Nematoda;Chromadorea;Spirurida;Filarioidea;Onchocercidae;Loa;Loa loa;
0	1	Minc00031	-	-	-	-	-	-	-	-	-	-	-	-	-	-	-
0	1	Minc00085	-	-	-	-	-	-	-	-	-	-	-	-	-	-	-
0	250	Minc01440a	-	-	0	-	-	-	-	0	597845480	61.88	A_cey	Ancylostoma ceylanicum	@Eukaryota@Metazoa	53326	;cellular organisms;Eukaryota;Opisthokonta;Metazoa;Eumetazoa;Bilateria;Protostomia;Ecdysozoa;Nematoda;Chromadorea;Rhabditida;Strongylida;Ancylostomatoidea;Ancylostomatidae;Ancylostomatinae;Ancylostoma;Ancylostoma ceylanicum;
0	252	Minc01453	-	-	0	-	-	-	0	0	393911066	68.58	L_loa	Loa loa	@Eukaryota@Metazoa	7209	;cellular organisms;Eukaryota;Opisthokonta;Metazoa;Eumetazoa;Bilateria;Protostomia;Ecdysozoa;Nematoda;Chromadorea;Spirurida;Filarioidea;Onchocercidae;Loa;Loa loa;
0	2	Minc10315	-	-	-	-	-	-	-	-	-	-	-	-	-	-	-
0	1	Minc09973a	-	-	-	-	-	-	-	-	-	-	-	-	-	-	-
0	1	Minc09973b	-	-	-	-	-	-	-	-	-	-	-	-	-	-	-
0	1	Minc09973c	-	-	-	-	-	-	-	-	-	-	-	-	-	-	-
0	1	Minc09973d	-	-	-	-	-	-	-	-	-	-	-	-	-	-	-
0	1	Minc09973e	-	-	-	-	-	-	-	-	-	-	-	-	-	-	-
0	1	Minc09978	-	-	-	-	-	-	-	-	-	-	-	-	-	-	-
0	252	Minc11539	-	-	2e-41	-	-	-	2e-41	2e-41	339257746	34.43	T_spi	Trichinella spiralis	@Eukaryota@Metazoa	6334	;cellular organisms;Eukaryota;Opisthokonta;Metazoa;Eumetazoa;Bilateria;Protostomia;Ecdysozoa;Nematoda;Enoplea;Dorylaimia;Trichocephalida;Trichinellidae;Trichinella;Trichinella spiralis;
0	107	Minc13768	-	-	-	-	-	-	-	-	-	-	-	-	-	-	-
0	251	Minc17969	-	-	0	-	-	-	-	0	560118987	68.17	H_con	Haemonchus contortus	@Eukaryota@Metazoa	6289	;cellular organisms;Eukaryota;Opisthokonta;Metazoa;Eumetazoa;Bilateria;Protostomia;Ecdysozoa;Nematoda;Chromadorea;Rhabditida;Strongylida;Trichostrongyloidea;Haemonchidae;Haemonchinae;Haemonchus;Haemonchus contortus;
0	1	Minc09288	-	-	-	-	-	-	-	-	-	-	-	-	-	-	-
0	209	Minc17301	-	-	9e-07	-	-	-	-	9e-07	568016029	45.76	P_par	Phytophthora parasitica	@Eukaryota	4792	;cellular organisms;Eukaryota;Stramenopiles;Oomycetes;Peronosporales;Phytophthora;Phytophthora parasitica;
0	1	Minc07865c	-	-	-	-	-	-	-	-	-	-	-	-	-	-	-
0	1	Minc08782	-	-	-	-	-	-	-	-	-	-	-	-	-	-	-
0	251	Minc12143	-	-	0	-	-	0	-	0	597850760	47.32	A_cey	Ancylostoma ceylanicum	@Eukaryota@Metazoa	53326	;cellular organisms;Eukaryota;Opisthokonta;Metazoa;Eumetazoa;Bilateria;Protostomia;Ecdysozoa;Nematoda;Chromadorea;Rhabditida;Strongylida;Ancylostomatoidea;Ancylostomatidae;Ancylostomatinae;Ancylostoma;Ancylostoma ceylanicum;
0	250	Minc10206	-	-	0	-	-	-	-	0	541045983	70.94	A_suu	Ascaris suum	@Eukaryota@Metazoa	6253	;cellular organisms;Eukaryota;Opisthokonta;Metazoa;Eumetazoa;Bilateria;Protostomia;Ecdysozoa;Nematoda;Chromadorea;Ascaridida;Ascaridoidea;Ascarididae;Ascaris;Ascaris suum;
0	250	Minc04387	-	-	0	-	-	-	-	0	306922435	91.88	D_mel	Drosophila melanogaster	@Eukaryota@Metazoa	7227	;cellular organisms;Eukaryota;Opisthokonta;Metazoa;Eumetazoa;Bilateria;Protostomia;Ecdysozoa;Panarthropoda;Arthropoda;Mandibulata;Pancrustacea;Hexapoda;Insecta;Dicondylia;Pterygota;Neoptera;Holometabola;Diptera;Brachycera;Muscomorpha;Eremoneura;Cyclorrhapha;Schizophora;Acalyptratae;Ephydroidea;Drosophilidae;Drosophilinae;Drosophilini;Drosophila;Sophophora;melanogaster group;melanogaster subgroup;…
0	1	Minc02311	-	-	-	-	-	-	-	-	-	-	-	-	-	-	-
0	1	Minc02312	-	-	-	-	-	-	-	-	-	-	-	-	-	-	-
0	1	Minc02313	-	-	-	-	-	-	-	-	-	-	-	-	-	-	-
0	250	Minc16690a	-	-	0	-	-	-	-	0	560120601	79.65	H_con	Haemonchus contortus	@Eukaryota@Metazoa	6289	;cellular organisms;Eukaryota;Opisthokonta;Metazoa;Eumetazoa;Bilateria;Protostomia;Ecdysozoa;Nematoda;Chromadorea;Rhabditida;Strongylida;Trichostrongyloidea;Haemonchidae;Haemonchinae;Haemonchus;Haemonchus contortus;
0	250	Minc16690b	-	-	0	-	-	-	-	0	560120601	83.2	H_con	Haemonchus contortus	@Eukaryota@Metazoa	6289	;cellular organisms;Eukaryota;Opisthokonta;Metazoa;Eumetazoa;Bilateria;Protostomia;Ecdysozoa;Nematoda;Chromadorea;Rhabditida;Strongylida;Trichostrongyloidea;Haemonchidae;Haemonchinae;Haemonchus;Haemonchus contortus;
0	321	Minc13746	-	-	0	-	-	-	-	0	405965488	50.43	C_gig	Crassostrea gigas	@Eukaryota@Metazoa	29159	;cellular organisms;Eukaryota;Opisthokonta;Metazoa;Eumetazoa;Bilateria;Protostomia;Lophotrochozoa;Mollusca;Bivalvia;Pteriomorphia;Ostreoida;Ostreoidea;Ostreidae;Crassostrea;Crassostrea gigas;
0	481	Minc13384	-	-	0	-	-	0	-	0	312080777	72.9	L_loa	Loa loa	@Eukaryota@Metazoa	7209	;cellular organisms;Eukaryota;Opisthokonta;Metazoa;Eumetazoa;Bilateria;Protostomia;Ecdysozoa;Nematoda;Chromadorea;Spirurida;Filarioidea;Onchocercidae;Loa;Loa loa;
0	250	Minc03719	-	-	0	-	-	-	0	0	597845253	56.51	A_cey	Ancylostoma ceylanicum	@Eukaryota@Metazoa	53326	;cellular organisms;Eukaryota;Opisthokonta;Metazoa;Eumetazoa;Bilateria;Protostomia;Ecdysozoa;Nematoda;Chromadorea;Rhabditida;Strongylida;Ancylostomatoidea;Ancylostomatidae;Ancylostomatinae;Ancylostoma;Ancylostoma ceylanicum;
0	250	Minc05153	-	-	0	-	-	-	-	0	597897260	64.85	A_cey	Ancylostoma ceylanicum	@Eukaryota@Metazoa	53326	;cellular organisms;Eukaryota;Opisthokonta;Metazoa;Eumetazoa;Bilateria;Protostomia;Ecdysozoa;Nematoda;Chromadorea;Rhabditida;Strongylida;Ancylostomatoidea;Ancylostomatidae;Ancylostomatinae;Ancylostoma;Ancylostoma ceylanicum;
0	250	Minc17720a	-	-	0	-	-	0	-	0	71989645	76.72	C_ele	Caenorhabditis elegans	@Eukaryota@Metazoa	6239	;cellular organisms;Eukaryota;Opisthokonta;Metazoa;Eumetazoa;Bilateria;Protostomia;Ecdysozoa;Nematoda;Chromadorea;Rhabditida;Rhabditoidea;Rhabditidae;Peloderinae;Caenorhabditis;Caenorhabditis elegans;
0	250	Minc17720b	-	-	0	-	-	0	-	0	341898292	76.85	C_bre	Caenorhabditis brenneri	@Eukaryota@Metazoa	135651	;cellular organisms;Eukaryota;Opisthokonta;Metazoa;Eumetazoa;Bilateria;Protostomia;Ecdysozoa;Nematoda;Chromadorea;Rhabditida;Rhabditoidea;Rhabditidae;Peloderinae;Caenorhabditis;Caenorhabditis brenneri;
0	1	Minc08116	-	-	-	-	-	-	-	-	-	-	-	-	-	-	-
0	252	Minc18800	-	-	0	-	-	-	0	0	597881245	61.89	A_cey	Ancylostoma ceylanicum	@Eukaryota@Metazoa	53326	;cellular organisms;Eukaryota;Opisthokonta;Metazoa;Eumetazoa;Bilateria;Protostomia;Ecdysozoa;Nematoda;Chromadorea;Rhabditida;Strongylida;Ancylostomatoidea;Ancylostomatidae;Ancylostomatinae;Ancylostoma;Ancylostoma ceylanicum;
0	3	Minc11847	-	-	-	-	-	-	-	-	-	-	-	-	-	-	-
0	254	Minc13810	-	-	0	-	-	-	-	0	560121307	67.54	H_con	Haemonchus contortus	@Eukaryota@Metazoa	6289	;cellular organisms;Eukaryota;Opisthokonta;Metazoa;Eumetazoa;Bilateria;Protostomia;Ecdysozoa;Nematoda;Chromadorea;Rhabditida;Strongylida;Trichostrongyloidea;Haemonchidae;Haemonchinae;Haemonchus;Haemonchus contortus;
0	435	Minc16448	-	-	0	-	-	-	0	0	597849617	49.45	A_cey	Ancylostoma ceylanicum	@Eukaryota@Metazoa	53326	;cellular organisms;Eukaryota;Opisthokonta;Metazoa;Eumetazoa;Bilateria;Protostomia;Ecdysozoa;Nematoda;Chromadorea;Rhabditida;Strongylida;Ancylostomatoidea;Ancylostomatidae;Ancylostomatinae;Ancylostoma;Ancylostoma ceylanicum;
0	255	Minc16449	-	-	0	-	-	-	-	0	597851742	72.87	A_cey	Ancylostoma ceylanicum	@Eukaryota@Metazoa	53326	;cellular organisms;Eukaryota;Opisthokonta;Metazoa;Eumetazoa;Bilateria;Protostomia;Ecdysozoa;Nematoda;Chromadorea;Rhabditida;Strongylida;Ancylostomatoidea;Ancylostomatidae;Ancylostomatinae;Ancylostoma;Ancylostoma ceylanicum;
0	1	Minc18033	-	-	-	-	-	-	-	-	-	-	-	-	-	-	-
0	250	Minc13164	-	-	0	-	-	-	-	0	18389427	70.64	A_suu	Ascaris suum	@Eukaryota@Metazoa	6253	;cellular organisms;Eukaryota;Opisthokonta;Metazoa;Eumetazoa;Bilateria;Protostomia;Ecdysozoa;Nematoda;Chromadorea;Ascaridida;Ascaridoidea;Ascarididae;Ascaris;Ascaris suum;
0	256	Minc17080	-	-	0	-	-	-	0	0	597844732	53.96	A_cey	Ancylostoma ceylanicum	@Eukaryota@Metazoa	53326	;cellular organisms;Eukaryota;Opisthokonta;Metazoa;Eumetazoa;Bilateria;Protostomia;Ecdysozoa;Nematoda;Chromadorea;Rhabditida;Strongylida;Ancylostomatoidea;Ancylostomatidae;Ancylostomatinae;Ancylostoma;Ancylostoma ceylanicum;
0	250	Minc17276a	-	-	0	-	-	-	0	0	568295164	73.03	N_ame	Necator americanus	@Eukaryota@Metazoa	51031	;cellular organisms;Eukaryota;Opisthokonta;Metazoa;Eumetazoa;Bilateria;Protostomia;Ecdysozoa;Nematoda;Chromadorea;Rhabditida;Strongylida;Ancylostomatoidea;Ancylostomatidae;Bunostominae;Necator;Necator americanus;
0	250	Minc15623	-	-	0	-	-	-	-	0	25144720	61.44	C_ele	Caenorhabditis elegans	@Eukaryota@Metazoa	6239	;cellular organisms;Eukaryota;Opisthokonta;Metazoa;Eumetazoa;Bilateria;Protostomia;Ecdysozoa;Nematoda;Chromadorea;Rhabditida;Rhabditoidea;Rhabditidae;Peloderinae;Caenorhabditis;Caenorhabditis elegans;
0	250	Minc17120	-	-	0	-	-	-	-	0	402594241	70.11	W_ban	Wuchereria bancrofti	@Eukaryota@Metazoa	6293	;cellular organisms;Eukaryota;Opisthokonta;Metazoa;Eumetazoa;Bilateria;Protostomia;Ecdysozoa;Nematoda;Chromadorea;Spirurida;Filarioidea;Onchocercidae;Wuchereria;Wuchereria bancrofti;
0	1	Minc07267	-	-	-	-	-	-	-	-	-	-	-	-	-	-	-
0	250	Minc07270	-	-	0	-	-	-	-	0	525328799	72.65	B_mor	Bombyx mori	@Eukaryota@Metazoa	7091	;cellular organisms;Eukaryota;Opisthokonta;Metazoa;Eumetazoa;Bilateria;Protostomia;Ecdysozoa;Panarthropoda;Arthropoda;Mandibulata;Pancrustacea;Hexapoda;Insecta;Dicondylia;Pterygota;Neoptera;Holometabola;Amphiesmenoptera;Lepidoptera;Glossata;Neolepidoptera;Heteroneura;Ditrysia;Obtectomera;Bombycoidea;Bombycidae;Bombycinae;Bombyx;Bombyx mori;
0	250	Minc07272	-	-	0	-	-	-	-	0	161661023	73.67	L_sin	Lycosa singoriensis	@Eukaryota@Metazoa	434756	;cellular organisms;Eukaryota;Opisthokonta;Metazoa;Eumetazoa;Bilateria;Protostomia;Ecdysozoa;Panarthropoda;Arthropoda;Chelicerata;Arachnida;Araneae;Araneomorphae;Entelegynae;RTA clade;Lycosoidea;Lycosidae;Lycosa;Lycosa singoriensis;
0	1	Minc05757	-	-	-	-	-	-	-	-	-	-	-	-	-	-	-
0	1	Minc05758	-	-	-	-	-	-	-	-	-	-	-	-	-	-	-
0	250	Minc14538	-	-	0	-	-	-	-	0	637375880	55.81	A_car	Anolis carolinensis	@Eukaryota@Metazoa	28377	;cellular organisms;Eukaryota;Opisthokonta;Metazoa;Eumetazoa;Bilateria;Deuterostomia;Chordata;Craniata;Vertebrata;Gnathostomata;Teleostomi;Euteleostomi;Sarcopterygii;Dipnotetrapodomorpha;Tetrapoda;Amniota;Sauropsida;Sauria;Lepidosauria;Squamata;Bifurcata;Unidentata;Episquamata;Toxicofera;Iguania;Iguanidae;Polychrotinae;Anolis;Anolis carolinensis;
0	250	Minc01957	-	-	0	-	-	0	-	0	597850073	56.41	A_cey	Ancylostoma ceylanicum	@Eukaryota@Metazoa	53326	;cellular organisms;Eukaryota;Opisthokonta;Metazoa;Eumetazoa;Bilateria;Protostomia;Ecdysozoa;Nematoda;Chromadorea;Rhabditida;Strongylida;Ancylostomatoidea;Ancylostomatidae;Ancylostomatinae;Ancylostoma;Ancylostoma ceylanicum;
0	251	Minc01971	-	-	0	-	-	-	0	0	402591511	52.04	W_ban	Wuchereria bancrofti	@Eukaryota@Metazoa	6293	;cellular organisms;Eukaryota;Opisthokonta;Metazoa;Eumetazoa;Bilateria;Protostomia;Ecdysozoa;Nematoda;Chromadorea;Spirurida;Filarioidea;Onchocercidae;Wuchereria;Wuchereria bancrofti;
0	250	Minc01972	-	-	0	-	-	0	-	0	393908216	87.56	L_loa	Loa loa	@Eukaryota@Metazoa	7209	;cellular organisms;Eukaryota;Opisthokonta;Metazoa;Eumetazoa;Bilateria;Protostomia;Ecdysozoa;Nematoda;Chromadorea;Spirurida;Filarioidea;Onchocercidae;Loa;Loa loa;
0	461	Minc15232	-	-	0	-	-	-	-	0	541042601	43.67	A_suu	Ascaris suum	@Eukaryota@Metazoa	6253	;cellular organisms;Eukaryota;Opisthokonta;Metazoa;Eumetazoa;Bilateria;Protostomia;Ecdysozoa;Nematoda;Chromadorea;Ascaridida;Ascaridoidea;Ascarididae;Ascaris;Ascaris suum;
0	324	Minc01107a	-	-	0	-	-	0	-	0	166233534	54.33	R_nor	Rattus norvegicus	@Eukaryota@Metazoa	10116	;cellular organisms;Eukaryota;Opisthokonta;Metazoa;Eumetazoa;Bilateria;Deuterostomia;Chordata;Craniata;Vertebrata;Gnathostomata;Teleostomi;Euteleostomi;Sarcopterygii;Dipnotetrapodomorpha;Tetrapoda;Amniota;Mammalia;Theria;Eutheria;Boreoeutheria;Euarchontoglires;Glires;Rodentia;Myomorpha;Muroidea;Muridae;Murinae;Rattus;Rattus norvegicus;
0	250	Minc01120	-	-	0	-	-	-	0	0	568292448	94.28	N_ame	Necator americanus	@Eukaryota@Metazoa	51031	;cellular organisms;Eukaryota;Opisthokonta;Metazoa;Eumetazoa;Bilateria;Protostomia;Ecdysozoa;Nematoda;Chromadorea;Rhabditida;Strongylida;Ancylostomatoidea;Ancylostomatidae;Bunostominae;Necator;Necator americanus;
0	250	Minc06773a	-	-	0	-	-	-	-	0	21386909	99.47	P_red	Panagrellus redivivus	@Eukaryota@Metazoa	6233	;cellular organisms;Eukaryota;Opisthokonta;Metazoa;Eumetazoa;Bilateria;Protostomia;Ecdysozoa;Nematoda;Chromadorea;Rhabditida;Panagrolaimoidea;Panagrolaimidae;Panagrellus;Panagrellus redivivus;
0	250	Minc06776	-	-	0	-	-	-	-	0	312069559	73.33	L_loa	Loa loa	@Eukaryota@Metazoa	7209	;cellular organisms;Eukaryota;Opisthokonta;Metazoa;Eumetazoa;Bilateria;Protostomia;Ecdysozoa;Nematoda;Chromadorea;Spirurida;Filarioidea;Onchocercidae;Loa;Loa loa;
0	275	Minc12194	-	-	0	-	-	-	-	0	312085220	67.49	L_loa	Loa loa	@Eukaryota@Metazoa	7209	;cellular organisms;Eukaryota;Opisthokonta;Metazoa;Eumetazoa;Bilateria;Protostomia;Ecdysozoa;Nematoda;Chromadorea;Spirurida;Filarioidea;Onchocercidae;Loa;Loa loa;
0	250	Minc12198	-	-	0	-	-	0	-	0	312080777	65.96	L_loa	Loa loa	@Eukaryota@Metazoa	7209	;cellular organisms;Eukaryota;Opisthokonta;Metazoa;Eumetazoa;Bilateria;Protostomia;Ecdysozoa;Nematoda;Chromadorea;Spirurida;Filarioidea;Onchocercidae;Loa;Loa loa;
0	251	Minc14036	-	-	0	-	-	-	-	0	541044386	50.06	A_suu	Ascaris suum	@Eukaryota@Metazoa	6253	;cellular organisms;Eukaryota;Opisthokonta;Metazoa;Eumetazoa;Bilateria;Protostomia;Ecdysozoa;Nematoda;Chromadorea;Ascaridida;Ascaridoidea;Ascarididae;Ascaris;Ascaris suum;
0	250	Minc10118	-	-	0	-	-	0	-	0	170591839	76.06	B_mal	Brugia malayi	@Eukaryota@Metazoa	6279	;cellular organisms;Eukaryota;Opisthokonta;Metazoa;Eumetazoa;Bilateria;Protostomia;Ecdysozoa;Nematoda;Chromadorea;Spirurida;Filarioidea;Onchocercidae;Brugia;Brugia malayi;
0	250	Minc03292	-	-	0	-	-	-	-	0	308487975	73.73	C_rem	Caenorhabditis remanei	@Eukaryota@Metazoa	31234	;cellular organisms;Eukaryota;Opisthokonta;Metazoa;Eumetazoa;Bilateria;Protostomia;Ecdysozoa;Nematoda;Chromadorea;Rhabditida;Rhabditoidea;Rhabditidae;Peloderinae;Caenorhabditis;Caenorhabditis remanei;
0	250	Minc07786	-	-	0	-	-	-	-	0	541048118	73.98	A_suu	Ascaris suum	@Eukaryota@Metazoa	6253	;cellular organisms;Eukaryota;Opisthokonta;Metazoa;Eumetazoa;Bilateria;Protostomia;Ecdysozoa;Nematoda;Chromadorea;Ascaridida;Ascaridoidea;Ascarididae;Ascaris;Ascaris suum;
0	1	Minc09340	-	-	-	-	-	-	-	-	-	-	-	-	-	-	-
0	251	Minc05991	-	-	0	-	-	-	-	0	597833320	68.12	A_cey	Ancylostoma ceylanicum	@Eukaryota@Metazoa	53326	;cellular organisms;Eukaryota;Opisthokonta;Metazoa;Eumetazoa;Bilateria;Protostomia;Ecdysozoa;Nematoda;Chromadorea;Rhabditida;Strongylida;Ancylostomatoidea;Ancylostomatidae;Ancylostomatinae;Ancylostoma;Ancylostoma ceylanicum;
0	252	Minc12116	-	-	3e-25	-	-	-	3e-25	3e-25	238882462	28.51	Candi	Candida albicans WO-1	@Eukaryota@Fungi	294748	;cellular organisms;Eukaryota;Opisthokonta;Fungi;Dikarya;Ascomycota;saccharomyceta;Saccharomycotina;Saccharomycetes;Saccharomycetales;Debaryomycetaceae;Candida/Lodderomyces clade;Candida;Candida albicans;Candida albicans WO-1;
0	250	Minc11936a	-	-	0	-	-	-	-	0	402590146	67.12	W_ban	Wuchereria bancrofti	@Eukaryota@Metazoa	6293	;cellular organisms;Eukaryota;Opisthokonta;Metazoa;Eumetazoa;Bilateria;Protostomia;Ecdysozoa;Nematoda;Chromadorea;Spirurida;Filarioidea;Onchocercidae;Wuchereria;Wuchereria bancrofti;
0	251	Minc14887a	-	-	0	-	-	-	0	0	597842635	83.49	A_cey	Ancylostoma ceylanicum	@Eukaryota@Metazoa	53326	;cellular organisms;Eukaryota;Opisthokonta;Metazoa;Eumetazoa;Bilateria;Protostomia;Ecdysozoa;Nematoda;Chromadorea;Rhabditida;Strongylida;Ancylostomatoidea;Ancylostomatidae;Ancylostomatinae;Ancylostoma;Ancylostoma ceylanicum;
0	251	Minc14887c	-	-	0	-	-	-	0	0	597842635	82.87	A_cey	Ancylostoma ceylanicum	@Eukaryota@Metazoa	53326	;cellular organisms;Eukaryota;Opisthokonta;Metazoa;Eumetazoa;Bilateria;Protostomia;Ecdysozoa;Nematoda;Chromadorea;Rhabditida;Strongylida;Ancylostomatoidea;Ancylostomatidae;Ancylostomatinae;Ancylostoma;Ancylostoma ceylanicum;
0	3	Minc10888	-	-	-	-	-	-	-	-	-	-	-	-	-	-	-
0	114	Minc04469	-	-	-	-	-	-	-	-	-	-	-	-	-	-	-
0	1	Minc04485	-	-	-	-	-	-	-	-	-	-	-	-	-	-	-
0	250	Minc06993a	-	-	0	-	-	-	-	0	393905846	76.98	L_loa	Loa loa	@Eukaryota@Metazoa	7209	;cellular organisms;Eukaryota;Opisthokonta;Metazoa;Eumetazoa;Bilateria;Protostomia;Ecdysozoa;Nematoda;Chromadorea;Spirurida;Filarioidea;Onchocercidae;Loa;Loa loa;
0	250	Minc13991	-	-	0	-	-	-	0	0	261263182	62.04	C_bri	Caenorhabditis briggsae	@Eukaryota@Metazoa	6238	;cellular organisms;Eukaryota;Opisthokonta;Metazoa;Eumetazoa;Bilateria;Protostomia;Ecdysozoa;Nematoda;Chromadorea;Rhabditida;Rhabditoidea;Rhabditidae;Peloderinae;Caenorhabditis;Caenorhabditis briggsae;
0	250	Minc13545	-	-	0	-	-	-	-	0	402588561	82.64	W_ban	Wuchereria bancrofti	@Eukaryota@Metazoa	6293	;cellular organisms;Eukaryota;Opisthokonta;Metazoa;Eumetazoa;Bilateria;Protostomia;Ecdysozoa;Nematoda;Chromadorea;Spirurida;Filarioidea;Onchocercidae;Wuchereria;Wuchereria bancrofti;
0	2	Minc07216	-	-	-	-	-	-	-	-	-	-	-	-	-	-	-
0	250	Minc17996	-	-	0	-	-	0	-	0	308474530	78.92	C_rem	Caenorhabditis remanei	@Eukaryota@Metazoa	31234	;cellular organisms;Eukaryota;Opisthokonta;Metazoa;Eumetazoa;Bilateria;Protostomia;Ecdysozoa;Nematoda;Chromadorea;Rhabditida;Rhabditoidea;Rhabditidae;Peloderinae;Caenorhabditis;Caenorhabditis remanei;
0	273	Minc03824	-	-	0	-	-	-	-	0	170593781	71.09	B_mal	Brugia malayi	@Eukaryota@Metazoa	6279	;cellular organisms;Eukaryota;Opisthokonta;Metazoa;Eumetazoa;Bilateria;Protostomia;Ecdysozoa;Nematoda;Chromadorea;Spirurida;Filarioidea;Onchocercidae;Brugia;Brugia malayi;
0	250	Minc14379	-	0	-	-	-	-	-	0	597856312	60.82	A_cey	Ancylostoma ceylanicum	@Eukaryota@Metazoa	53326	;cellular organisms;Eukaryota;Opisthokonta;Metazoa;Eumetazoa;Bilateria;Protostomia;Ecdysozoa;Nematoda;Chromadorea;Rhabditida;Strongylida;Ancylostomatoidea;Ancylostomatidae;Ancylostomatinae;Ancylostoma;Ancylostoma ceylanicum;
0	1	Minc18591	-	-	-	-	-	-	-	-	-	-	-	-	-	-	-
0	156	Minc10636	-	-	2e-06	-	-	-	2e-06	2e-06	575515715	66.67	nd	[Candida] tenuis ATCC 10573	@Eukaryota@Fungi	590646	;cellular organisms;Eukaryota;Opisthokonta;Fungi;Dikarya;Ascomycota;saccharomyceta;Saccharomycotina;Saccharomycetes;Saccharomycetales;Debaryomycetaceae;Yamadazyma;Yamadazyma/Candida clade;[Candida] tenuis;[Candida] tenuis ATCC 10573;
0	251	Minc18122	-	-	0	-	-	-	-	0	170579858	76.27	B_mal	Brugia malayi	@Eukaryota@Metazoa	6279	;cellular organisms;Eukaryota;Opisthokonta;Metazoa;Eumetazoa;Bilateria;Protostomia;Ecdysozoa;Nematoda;Chromadorea;Spirurida;Filarioidea;Onchocercidae;Brugia;Brugia malayi;
0	396	Minc15347a	-	-	0	-	-	-	0	0	541041990	48.93	A_suu	Ascaris suum	@Eukaryota@Metazoa	6253	;cellular organisms;Eukaryota;Opisthokonta;Metazoa;Eumetazoa;Bilateria;Protostomia;Ecdysozoa;Nematoda;Chromadorea;Ascaridida;Ascaridoidea;Ascarididae;Ascaris;Ascaris suum;
0	395	Minc15347b	-	-	0	-	-	-	0	0	541041990	48.95	A_suu	Ascaris suum	@Eukaryota@Metazoa	6253	;cellular organisms;Eukaryota;Opisthokonta;Metazoa;Eumetazoa;Bilateria;Protostomia;Ecdysozoa;Nematoda;Chromadorea;Ascaridida;Ascaridoidea;Ascarididae;Ascaris;Ascaris suum;
0	252	Minc17259	-	-	0	-	-	-	0	0	541047755	70.98	A_suu	Ascaris suum	@Eukaryota@Metazoa	6253	;cellular organisms;Eukaryota;Opisthokonta;Metazoa;Eumetazoa;Bilateria;Protostomia;Ecdysozoa;Nematoda;Chromadorea;Ascaridida;Ascaridoidea;Ascarididae;Ascaris;Ascaris suum;
0	251	Minc06752	-	-	0	-	-	-	-	0	597881245	77.99	A_cey	Ancylostoma ceylanicum	@Eukaryota@Metazoa	53326	;cellular organisms;Eukaryota;Opisthokonta;Metazoa;Eumetazoa;Bilateria;Protostomia;Ecdysozoa;Nematoda;Chromadorea;Rhabditida;Strongylida;Ancylostomatoidea;Ancylostomatidae;Ancylostomatinae;Ancylostoma;Ancylostoma ceylanicum;
0	52	Minc12768	-	-	6e-09	-	-	-	-	6e-09	348674089	33.03	P_soj	Phytophthora sojae	@Eukaryota	67593	;cellular organisms;Eukaryota;Stramenopiles;Oomycetes;Peronosporales;Phytophthora;Phytophthora sojae;
0	254	Minc14510	-	-	0	-	-	-	0	0	541048462	63.81	A_suu	Ascaris suum	@Eukaryota@Metazoa	6253	;cellular organisms;Eukaryota;Opisthokonta;Metazoa;Eumetazoa;Bilateria;Protostomia;Ecdysozoa;Nematoda;Chromadorea;Ascaridida;Ascaridoidea;Ascarididae;Ascaris;Ascaris suum;
0	251	Minc09242	-	-	0	-	-	-	-	0	541046176	62.33	A_suu	Ascaris suum	@Eukaryota@Metazoa	6253	;cellular organisms;Eukaryota;Opisthokonta;Metazoa;Eumetazoa;Bilateria;Protostomia;Ecdysozoa;Nematoda;Chromadorea;Ascaridida;Ascaridoidea;Ascarididae;Ascaris;Ascaris suum;
0	250	Minc09243	-	-	0	-	-	-	0	0	17506981	62.87	C_ele	Caenorhabditis elegans	@Eukaryota@Metazoa	6239	;cellular organisms;Eukaryota;Opisthokonta;Metazoa;Eumetazoa;Bilateria;Protostomia;Ecdysozoa;Nematoda;Chromadorea;Rhabditida;Rhabditoidea;Rhabditidae;Peloderinae;Caenorhabditis;Caenorhabditis elegans;
0	250	Minc07440	-	-	0	-	-	0	-	0	170592987	82.59	B_mal	Brugia malayi	@Eukaryota@Metazoa	6279	;cellular organisms;Eukaryota;Opisthokonta;Metazoa;Eumetazoa;Bilateria;Protostomia;Ecdysozoa;Nematoda;Chromadorea;Spirurida;Filarioidea;Onchocercidae;Brugia;Brugia malayi;
0	315	Minc07445	-	-	0	-	-	-	-	0	393911071	49.38	L_loa	Loa loa	@Eukaryota@Metazoa	7209	;cellular organisms;Eukaryota;Opisthokonta;Metazoa;Eumetazoa;Bilateria;Protostomia;Ecdysozoa;Nematoda;Chromadorea;Spirurida;Filarioidea;Onchocercidae;Loa;Loa loa;
0	250	Minc07451	-	-	0	-	-	-	-	0	560117494	85.11	H_con	Haemonchus contortus	@Eukaryota@Metazoa	6289	;cellular organisms;Eukaryota;Opisthokonta;Metazoa;Eumetazoa;Bilateria;Protostomia;Ecdysozoa;Nematoda;Chromadorea;Rhabditida;Strongylida;Trichostrongyloidea;Haemonchidae;Haemonchinae;Haemonchus;Haemonchus contortus;
0	269	Minc08571	-	-	0	-	-	-	0	0	597865099	46.31	A_cey	Ancylostoma ceylanicum	@Eukaryota@Metazoa	53326	;cellular organisms;Eukaryota;Opisthokonta;Metazoa;Eumetazoa;Bilateria;Protostomia;Ecdysozoa;Nematoda;Chromadorea;Rhabditida;Strongylida;Ancylostomatoidea;Ancylostomatidae;Ancylostomatinae;Ancylostoma;Ancylostoma ceylanicum;
0	10	Minc12523	-	-	-	-	-	-	-	-	-	-	-	-	-	-	-
0	1	Minc19145b	-	-	-	-	-	-	-	-	-	-	-	-	-	-	-
0	1	Minc18218	-	-	-	-	-	-	-	-	-	-	-	-	-	-	-
0	250	Minc14885a	-	-	0	-	-	-	-	0	541045299	64.11	A_suu	Ascaris suum	@Eukaryota@Metazoa	6253	;cellular organisms;Eukaryota;Opisthokonta;Metazoa;Eumetazoa;Bilateria;Protostomia;Ecdysozoa;Nematoda;Chromadorea;Ascaridida;Ascaridoidea;Ascarididae;Ascaris;Ascaris suum;
0	250	Minc08938	-	-	0	-	-	-	-	0	541048118	73.73	A_suu	Ascaris suum	@Eukaryota@Metazoa	6253	;cellular organisms;Eukaryota;Opisthokonta;Metazoa;Eumetazoa;Bilateria;Protostomia;Ecdysozoa;Nematoda;Chromadorea;Ascaridida;Ascaridoidea;Ascarididae;Ascaris;Ascaris suum;
0	250	Minc19024	-	-	0	-	-	-	0	0	541044644	66.81	A_suu	Ascaris suum	@Eukaryota@Metazoa	6253	;cellular organisms;Eukaryota;Opisthokonta;Metazoa;Eumetazoa;Bilateria;Protostomia;Ecdysozoa;Nematoda;Chromadorea;Ascaridida;Ascaridoidea;Ascarididae;Ascaris;Ascaris suum;
0	252	Minc11874a	-	-	0	-	-	-	-	0	393905846	73.96	L_loa	Loa loa	@Eukaryota@Metazoa	7209	;cellular organisms;Eukaryota;Opisthokonta;Metazoa;Eumetazoa;Bilateria;Protostomia;Ecdysozoa;Nematoda;Chromadorea;Spirurida;Filarioidea;Onchocercidae;Loa;Loa loa;
0	1	Minc13832	-	-	-	-	-	-	-	-	-	-	-	-	-	-	-
0	250	Minc13285	-	-	1e-08	-	-	-	1e-08	1e-08	196002081	28.31	T_adh	Trichoplax adhaerens	@Eukaryota@Metazoa	10228	;cellular organisms;Eukaryota;Opisthokonta;Metazoa;Placozoa;Trichoplax;Trichoplax adhaerens;
0	1	Minc01595	-	-	-	-	-	-	-	-	-	-	-	-	-	-	-
0	266	Minc03403	-	-	0	-	-	-	-	0	393905469	69.57	L_loa	Loa loa	@Eukaryota@Metazoa	7209	;cellular organisms;Eukaryota;Opisthokonta;Metazoa;Eumetazoa;Bilateria;Protostomia;Ecdysozoa;Nematoda;Chromadorea;Spirurida;Filarioidea;Onchocercidae;Loa;Loa loa;
0	250	Minc06200	-	0	-	-	-	-	-	0	341890443	66.21	C_bre	Caenorhabditis brenneri	@Eukaryota@Metazoa	135651	;cellular organisms;Eukaryota;Opisthokonta;Metazoa;Eumetazoa;Bilateria;Protostomia;Ecdysozoa;Nematoda;Chromadorea;Rhabditida;Rhabditoidea;Rhabditidae;Peloderinae;Caenorhabditis;Caenorhabditis brenneri;
0	250	Minc03998	-	-	0	-	-	-	0	0	170578894	68.84	B_mal	Brugia malayi	@Eukaryota@Metazoa	6279	;cellular organisms;Eukaryota;Opisthokonta;Metazoa;Eumetazoa;Bilateria;Protostomia;Ecdysozoa;Nematoda;Chromadorea;Spirurida;Filarioidea;Onchocercidae;Brugia;Brugia malayi;
0	336	Minc14665	-	-	0	-	-	0	-	0	541042128	68.33	A_suu	Ascaris suum	@Eukaryota@Metazoa	6253	;cellular organisms;Eukaryota;Opisthokonta;Metazoa;Eumetazoa;Bilateria;Protostomia;Ecdysozoa;Nematoda;Chromadorea;Ascaridida;Ascaridoidea;Ascarididae;Ascaris;Ascaris suum;
0	250	Minc17521	-	-	0	-	-	-	-	0	308470068	61.81	C_rem	Caenorhabditis remanei	@Eukaryota@Metazoa	31234	;cellular organisms;Eukaryota;Opisthokonta;Metazoa;Eumetazoa;Bilateria;Protostomia;Ecdysozoa;Nematoda;Chromadorea;Rhabditida;Rhabditoidea;Rhabditidae;Peloderinae;Caenorhabditis;Caenorhabditis remanei;
0	250	Minc00321	-	-	0	-	-	0	-	0	597841723	67.45	A_cey	Ancylostoma ceylanicum	@Eukaryota@Metazoa	53326	;cellular organisms;Eukaryota;Opisthokonta;Metazoa;Eumetazoa;Bilateria;Protostomia;Ecdysozoa;Nematoda;Chromadorea;Rhabditida;Strongylida;Ancylostomatoidea;Ancylostomatidae;Ancylostomatinae;Ancylostoma;Ancylostoma ceylanicum;
0	251	Minc00339	-	-	0	-	-	-	-	0	268553245	65.7	C_bri	Caenorhabditis briggsae	@Eukaryota@Metazoa	6238	;cellular organisms;Eukaryota;Opisthokonta;Metazoa;Eumetazoa;Bilateria;Protostomia;Ecdysozoa;Nematoda;Chromadorea;Rhabditida;Rhabditoidea;Rhabditidae;Peloderinae;Caenorhabditis;Caenorhabditis briggsae;
0	264	Minc00360	-	-	0	-	-	0	-	0	312066551	61.05	L_loa	Loa loa	@Eukaryota@Metazoa	7209	;cellular organisms;Eukaryota;Opisthokonta;Metazoa;Eumetazoa;Bilateria;Protostomia;Ecdysozoa;Nematoda;Chromadorea;Spirurida;Filarioidea;Onchocercidae;Loa;Loa loa;
0	254	Minc00367	-	-	0	-	-	-	-	0	170580396	39.91	B_mal	Brugia malayi	@Eukaryota@Metazoa	6279	;cellular organisms;Eukaryota;Opisthokonta;Metazoa;Eumetazoa;Bilateria;Protostomia;Ecdysozoa;Nematoda;Chromadorea;Spirurida;Filarioidea;Onchocercidae;Brugia;Brugia malayi;
0	341	Minc07622	-	-	0	-	-	-	0	0	393909859	43.89	L_loa	Loa loa	@Eukaryota@Metazoa	7209	;cellular organisms;Eukaryota;Opisthokonta;Metazoa;Eumetazoa;Bilateria;Protostomia;Ecdysozoa;Nematoda;Chromadorea;Spirurida;Filarioidea;Onchocercidae;Loa;Loa loa;
0	255	Minc07632	-	-	0	-	-	-	-	0	560121307	67.54	H_con	Haemonchus contortus	@Eukaryota@Metazoa	6289	;cellular organisms;Eukaryota;Opisthokonta;Metazoa;Eumetazoa;Bilateria;Protostomia;Ecdysozoa;Nematoda;Chromadorea;Rhabditida;Strongylida;Trichostrongyloidea;Haemonchidae;Haemonchinae;Haemonchus;Haemonchus contortus;
0	251	Minc11441	-	-	0	-	-	-	-	0	393911179	77.37	L_loa	Loa loa	@Eukaryota@Metazoa	7209	;cellular organisms;Eukaryota;Opisthokonta;Metazoa;Eumetazoa;Bilateria;Protostomia;Ecdysozoa;Nematoda;Chromadorea;Spirurida;Filarioidea;Onchocercidae;Loa;Loa loa;
0	1	Minc05565	-	-	-	-	-	-	-	-	-	-	-	-	-	-	-
0	250	Minc09795	-	-	0	-	-	0	-	0	312067941	74.57	L_loa	Loa loa	@Eukaryota@Metazoa	7209	;cellular organisms;Eukaryota;Opisthokonta;Metazoa;Eumetazoa;Bilateria;Protostomia;Ecdysozoa;Nematoda;Chromadorea;Spirurida;Filarioidea;Onchocercidae;Loa;Loa loa;
0	332	Minc05867	-	-	0	-	-	0	-	0	402593276	72.8	W_ban	Wuchereria bancrofti	@Eukaryota@Metazoa	6293	;cellular organisms;Eukaryota;Opisthokonta;Metazoa;Eumetazoa;Bilateria;Protostomia;Ecdysozoa;Nematoda;Chromadorea;Spirurida;Filarioidea;Onchocercidae;Wuchereria;Wuchereria bancrofti;
0	380	Minc05892	-	-	0	-	-	-	0	0	170593189	45.6	B_mal	Brugia malayi	@Eukaryota@Metazoa	6279	;cellular organisms;Eukaryota;Opisthokonta;Metazoa;Eumetazoa;Bilateria;Protostomia;Ecdysozoa;Nematoda;Chromadorea;Spirurida;Filarioidea;Onchocercidae;Brugia;Brugia malayi;
0	1	Minc10306	-	-	-	-	-	-	-	-	-	-	-	-	-	-	-
0	263	Minc03905	-	-	3e-15	-	-	-	3e-15	3e-15	512955321	31.12	H_gla	Heterocephalus glaber	@Eukaryota@Metazoa	10181	;cellular organisms;Eukaryota;Opisthokonta;Metazoa;Eumetazoa;Bilateria;Deuterostomia;Chordata;Craniata;Vertebrata;Gnathostomata;Teleostomi;Euteleostomi;Sarcopterygii;Dipnotetrapodomorpha;Tetrapoda;Amniota;Mammalia;Theria;Eutheria;Boreoeutheria;Euarchontoglires;Glires;Rodentia;Hystricomorpha;Bathyergidae;Heterocephalus;Heterocephalus glaber;
0	331	Minc14417	-	-	0	-	-	-	0	0	597879630	61.8	A_cey	Ancylostoma ceylanicum	@Eukaryota@Metazoa	53326	;cellular organisms;Eukaryota;Opisthokonta;Metazoa;Eumetazoa;Bilateria;Protostomia;Ecdysozoa;Nematoda;Chromadorea;Rhabditida;Strongylida;Ancylostomatoidea;Ancylostomatidae;Ancylostomatinae;Ancylostoma;Ancylostoma ceylanicum;
0	2	Minc11911	-	-	-	-	-	-	-	-	-	-	-	-	-	-	-
0	250	Minc02895	-	-	0	-	-	-	0	0	597889561	45.21	A_cey	Ancylostoma ceylanicum	@Eukaryota@Metazoa	53326	;cellular organisms;Eukaryota;Opisthokonta;Metazoa;Eumetazoa;Bilateria;Protostomia;Ecdysozoa;Nematoda;Chromadorea;Rhabditida;Strongylida;Ancylostomatoidea;Ancylostomatidae;Ancylostomatinae;Ancylostoma;Ancylostoma ceylanicum;
0	255	Minc02896	-	-	0	-	-	-	0	0	541044711	59.21	A_suu	Ascaris suum	@Eukaryota@Metazoa	6253	;cellular organisms;Eukaryota;Opisthokonta;Metazoa;Eumetazoa;Bilateria;Protostomia;Ecdysozoa;Nematoda;Chromadorea;Ascaridida;Ascaridoidea;Ascarididae;Ascaris;Ascaris suum;
0	411	Minc14825	-	-	0	-	-	-	-	0	308502213	84.73	C_rem	Caenorhabditis remanei	@Eukaryota@Metazoa	31234	;cellular organisms;Eukaryota;Opisthokonta;Metazoa;Eumetazoa;Bilateria;Protostomia;Ecdysozoa;Nematoda;Chromadorea;Rhabditida;Rhabditoidea;Rhabditidae;Peloderinae;Caenorhabditis;Caenorhabditis remanei;
0	250	Minc04005	-	0	-	-	-	-	-	0	341890443	66.21	C_bre	Caenorhabditis brenneri	@Eukaryota@Metazoa	135651	;cellular organisms;Eukaryota;Opisthokonta;Metazoa;Eumetazoa;Bilateria;Protostomia;Ecdysozoa;Nematoda;Chromadorea;Rhabditida;Rhabditoidea;Rhabditidae;Peloderinae;Caenorhabditis;Caenorhabditis brenneri;
0	251	Minc19113	-	-	0	-	-	-	0	0	541044343	59.1	A_suu	Ascaris suum	@Eukaryota@Metazoa	6253	;cellular organisms;Eukaryota;Opisthokonta;Metazoa;Eumetazoa;Bilateria;Protostomia;Ecdysozoa;Nematoda;Chromadorea;Ascaridida;Ascaridoidea;Ascarididae;Ascaris;Ascaris suum;
0	250	Minc17826	-	-	0	-	-	-	-	0	541042557	83.38	A_suu	Ascaris suum	@Eukaryota@Metazoa	6253	;cellular organisms;Eukaryota;Opisthokonta;Metazoa;Eumetazoa;Bilateria;Protostomia;Ecdysozoa;Nematoda;Chromadorea;Ascaridida;Ascaridoidea;Ascarididae;Ascaris;Ascaris suum;
0	250	Minc17052	-	-	0	-	-	-	-	0	597832660	70.45	A_cey	Ancylostoma ceylanicum	@Eukaryota@Metazoa	53326	;cellular organisms;Eukaryota;Opisthokonta;Metazoa;Eumetazoa;Bilateria;Protostomia;Ecdysozoa;Nematoda;Chromadorea;Rhabditida;Strongylida;Ancylostomatoidea;Ancylostomatidae;Ancylostomatinae;Ancylostoma;Ancylostoma ceylanicum;
0	8	Minc15746	-	-	-	-	-	-	-	-	-	-	-	-	-	-	-
0	10	Minc06911	-	-	-	-	-	-	-	-	-	-	-	-	-	-	-
0	10	Minc06913	-	-	-	-	-	-	-	-	-	-	-	-	-	-	-
0	250	Minc06517	-	-	0	-	-	0	-	0	308474530	82.2	C_rem	Caenorhabditis remanei	@Eukaryota@Metazoa	31234	;cellular organisms;Eukaryota;Opisthokonta;Metazoa;Eumetazoa;Bilateria;Protostomia;Ecdysozoa;Nematoda;Chromadorea;Rhabditida;Rhabditoidea;Rhabditidae;Peloderinae;Caenorhabditis;Caenorhabditis remanei;
0	250	Minc16414	-	-	0	-	-	0	-	0	312075283	53.99	L_loa	Loa loa	@Eukaryota@Metazoa	7209	;cellular organisms;Eukaryota;Opisthokonta;Metazoa;Eumetazoa;Bilateria;Protostomia;Ecdysozoa;Nematoda;Chromadorea;Spirurida;Filarioidea;Onchocercidae;Loa;Loa loa;
0	250	Minc03518	-	-	0	-	-	-	0	0	568295164	73.21	N_ame	Necator americanus	@Eukaryota@Metazoa	51031	;cellular organisms;Eukaryota;Opisthokonta;Metazoa;Eumetazoa;Bilateria;Protostomia;Ecdysozoa;Nematoda;Chromadorea;Rhabditida;Strongylida;Ancylostomatoidea;Ancylostomatidae;Bunostominae;Necator;Necator americanus;
0	1	Minc08851	-	-	-	-	-	-	-	-	-	-	-	-	-	-	-
0	251	Minc04087	-	-	0	-	-	-	-	0	541046493	66.1	A_suu	Ascaris suum	@Eukaryota@Metazoa	6253	;cellular organisms;Eukaryota;Opisthokonta;Metazoa;Eumetazoa;Bilateria;Protostomia;Ecdysozoa;Nematoda;Chromadorea;Ascaridida;Ascaridoidea;Ascarididae;Ascaris;Ascaris suum;
0	419	Minc04097	-	-	0	-	-	-	-	0	341884100	53.78	C_bre	Caenorhabditis brenneri	@Eukaryota@Metazoa	135651	;cellular organisms;Eukaryota;Opisthokonta;Metazoa;Eumetazoa;Bilateria;Protostomia;Ecdysozoa;Nematoda;Chromadorea;Rhabditida;Rhabditoidea;Rhabditidae;Peloderinae;Caenorhabditis;Caenorhabditis brenneri;
0	253	Minc14794	-	-	0	-	-	-	-	0	541043434	68.87	A_suu	Ascaris suum	@Eukaryota@Metazoa	6253	;cellular organisms;Eukaryota;Opisthokonta;Metazoa;Eumetazoa;Bilateria;Protostomia;Ecdysozoa;Nematoda;Chromadorea;Ascaridida;Ascaridoidea;Ascarididae;Ascaris;Ascaris suum;
0	338	Minc03327	-	-	0	-	-	-	-	0	597864214	57.48	A_cey	Ancylostoma ceylanicum	@Eukaryota@Metazoa	53326	;cellular organisms;Eukaryota;Opisthokonta;Metazoa;Eumetazoa;Bilateria;Protostomia;Ecdysozoa;Nematoda;Chromadorea;Rhabditida;Strongylida;Ancylostomatoidea;Ancylostomatidae;Ancylostomatinae;Ancylostoma;Ancylostoma ceylanicum;
0	250	Minc08943	-	-	0	-	-	-	-	0	597834579	61.18	A_cey	Ancylostoma ceylanicum	@Eukaryota@Metazoa	53326	;cellular organisms;Eukaryota;Opisthokonta;Metazoa;Eumetazoa;Bilateria;Protostomia;Ecdysozoa;Nematoda;Chromadorea;Rhabditida;Strongylida;Ancylostomatoidea;Ancylostomatidae;Ancylostomatinae;Ancylostoma;Ancylostoma ceylanicum;
0	252	Minc15180	-	-	0	-	-	0	-	0	312079478	85.22	L_loa	Loa loa	@Eukaryota@Metazoa	7209	;cellular organisms;Eukaryota;Opisthokonta;Metazoa;Eumetazoa;Bilateria;Protostomia;Ecdysozoa;Nematoda;Chromadorea;Spirurida;Filarioidea;Onchocercidae;Loa;Loa loa;
0	250	Minc04409	-	-	0	-	-	-	-	0	597867153	81.11	A_cey	Ancylostoma ceylanicum	@Eukaryota@Metazoa	53326	;cellular organisms;Eukaryota;Opisthokonta;Metazoa;Eumetazoa;Bilateria;Protostomia;Ecdysozoa;Nematoda;Chromadorea;Rhabditida;Strongylida;Ancylostomatoidea;Ancylostomatidae;Ancylostomatinae;Ancylostoma;Ancylostoma ceylanicum;
0	3	Minc02066	-	-	-	-	-	-	-	-	-	-	-	-	-	-	-
0	1	Minc02067	-	-	-	-	-	-	-	-	-	-	-	-	-	-	-
0	250	Minc11382	-	-	0	-	-	-	0	0	308510360	78.74	C_rem	Caenorhabditis remanei	@Eukaryota@Metazoa	31234	;cellular organisms;Eukaryota;Opisthokonta;Metazoa;Eumetazoa;Bilateria;Protostomia;Ecdysozoa;Nematoda;Chromadorea;Rhabditida;Rhabditoidea;Rhabditidae;Peloderinae;Caenorhabditis;Caenorhabditis remanei;
0	147	Minc09177	-	-	-	-	-	-	-	-	-	-	-	-	-	-	-
0	1	Minc14970	-	-	-	-	-	-	-	-	-	-	-	-	-	-	-
0	1	Minc15636	-	-	-	-	-	-	-	-	-	-	-	-	-	-	-
0	250	Minc16506	-	-	0	-	-	-	0	0	170578894	70.22	B_mal	Brugia malayi	@Eukaryota@Metazoa	6279	;cellular organisms;Eukaryota;Opisthokonta;Metazoa;Eumetazoa;Bilateria;Protostomia;Ecdysozoa;Nematoda;Chromadorea;Spirurida;Filarioidea;Onchocercidae;Brugia;Brugia malayi;
0	250	Minc00178	-	-	0	-	-	-	-	0	268581941	74.11	C_bri	Caenorhabditis briggsae	@Eukaryota@Metazoa	6238	;cellular organisms;Eukaryota;Opisthokonta;Metazoa;Eumetazoa;Bilateria;Protostomia;Ecdysozoa;Nematoda;Chromadorea;Rhabditida;Rhabditoidea;Rhabditidae;Peloderinae;Caenorhabditis;Caenorhabditis briggsae;
0	40	Minc05679	-	-	2e-05	-	-	-	2e-05	2e-05	156376817	59.46	N_vec	Nematostella vectensis	@Eukaryota@Metazoa	45351	;cellular organisms;Eukaryota;Opisthokonta;Metazoa;Eumetazoa;Cnidaria;Anthozoa;Hexacorallia;Actiniaria;Edwardsiidae;Nematostella;Nematostella vectensis;
0	153	Minc16948	-	-	1e-07	-	-	-	1e-07	1e-07	466070873	26.8	O_orc	Orcinus orca	@Eukaryota@Metazoa	9733	;cellular organisms;Eukaryota;Opisthokonta;Metazoa;Eumetazoa;Bilateria;Deuterostomia;Chordata;Craniata;Vertebrata;Gnathostomata;Teleostomi;Euteleostomi;Sarcopterygii;Dipnotetrapodomorpha;Tetrapoda;Amniota;Mammalia;Theria;Eutheria;Boreoeutheria;Laurasiatheria;Cetartiodactyla;Cetacea;Odontoceti;Delphinidae;Orcinus;Orcinus orca;
0	250	Minc18091	-	-	0	-	-	-	-	0	541039928	52.33	A_suu	Ascaris suum	@Eukaryota@Metazoa	6253	;cellular organisms;Eukaryota;Opisthokonta;Metazoa;Eumetazoa;Bilateria;Protostomia;Ecdysozoa;Nematoda;Chromadorea;Ascaridida;Ascaridoidea;Ascarididae;Ascaris;Ascaris suum;
0	250	Minc09635	-	-	0	-	-	-	-	0	560125103	59.73	H_con	Haemonchus contortus	@Eukaryota@Metazoa	6289	;cellular organisms;Eukaryota;Opisthokonta;Metazoa;Eumetazoa;Bilateria;Protostomia;Ecdysozoa;Nematoda;Chromadorea;Rhabditida;Strongylida;Trichostrongyloidea;Haemonchidae;Haemonchinae;Haemonchus;Haemonchus contortus;
0	250	Minc17573	-	-	0	-	-	-	-	0	541047854	74.39	A_suu	Ascaris suum	@Eukaryota@Metazoa	6253	;cellular organisms;Eukaryota;Opisthokonta;Metazoa;Eumetazoa;Bilateria;Protostomia;Ecdysozoa;Nematoda;Chromadorea;Ascaridida;Ascaridoidea;Ascarididae;Ascaris;Ascaris suum;
0	1	Minc16407	-	-	-	-	-	-	-	-	-	-	-	-	-	-	-
0	250	Minc14579	-	-	0	-	-	-	0	0	402593830	52.97	W_ban	Wuchereria bancrofti	@Eukaryota@Metazoa	6293	;cellular organisms;Eukaryota;Opisthokonta;Metazoa;Eumetazoa;Bilateria;Protostomia;Ecdysozoa;Nematoda;Chromadorea;Spirurida;Filarioidea;Onchocercidae;Wuchereria;Wuchereria bancrofti;
0	250	Minc09984	-	-	0	-	-	0	-	0	312071353	86.8	L_loa	Loa loa	@Eukaryota@Metazoa	7209	;cellular organisms;Eukaryota;Opisthokonta;Metazoa;Eumetazoa;Bilateria;Protostomia;Ecdysozoa;Nematoda;Chromadorea;Spirurida;Filarioidea;Onchocercidae;Loa;Loa loa;
0	525	Minc10006a	-	-	0	-	-	0	-	0	302843878	98.68	Volvo	Volvox carteri f. nagariensis	@Eukaryota@Viridiplantae	3068	;cellular organisms;Eukaryota;Viridiplantae;Chlorophyta;Chlorophyceae;Chlamydomonadales;Volvocaceae;Volvox;Volvox carteri;Volvox carteri f. nagariensis;
0	250	Minc00918	-	-	0	-	-	-	0	0	170579911	74.71	B_mal	Brugia malayi	@Eukaryota@Metazoa	6279	;cellular organisms;Eukaryota;Opisthokonta;Metazoa;Eumetazoa;Bilateria;Protostomia;Ecdysozoa;Nematoda;Chromadorea;Spirurida;Filarioidea;Onchocercidae;Brugia;Brugia malayi;
0	250	Minc00958	-	2e-13	-	-	-	-	-	2e-13	599564732	24.5	Chond	Chondromyces apiculatus DSM 436	@Bacteria	1192034	;cellular organisms;Bacteria;Proteobacteria;delta/epsilon subdivisions;Deltaproteobacteria;Myxococcales;Sorangiineae;Polyangiaceae;Chondromyces;Chondromyces apiculatus;Chondromyces apiculatus DSM 436;
0	3	Minc18310	-	-	-	-	-	-	-	-	-	-	-	-	-	-	-
0	250	Minc01042	-	-	0	-	-	-	-	0	388069	91.03	T_col	Trichostrongylus colubriformis	@Eukaryota@Metazoa	6319	;cellular organisms;Eukaryota;Opisthokonta;Metazoa;Eumetazoa;Bilateria;Protostomia;Ecdysozoa;Nematoda;Chromadorea;Rhabditida;Strongylida;Trichostrongyloidea;Trichostrongylidae;Trichostrongylinae;Trichostrongylus;Trichostrongylus colubriformis;
0	253	Minc01051	-	-	0	-	-	-	-	0	597872606	66.79	A_cey	Ancylostoma ceylanicum	@Eukaryota@Metazoa	53326	;cellular organisms;Eukaryota;Opisthokonta;Metazoa;Eumetazoa;Bilateria;Protostomia;Ecdysozoa;Nematoda;Chromadorea;Rhabditida;Strongylida;Ancylostomatoidea;Ancylostomatidae;Ancylostomatinae;Ancylostoma;Ancylostoma ceylanicum;
0	671	Minc01069	-	-	0	-	-	-	-	0	541048396	58.74	A_suu	Ascaris suum	@Eukaryota@Metazoa	6253	;cellular organisms;Eukaryota;Opisthokonta;Metazoa;Eumetazoa;Bilateria;Protostomia;Ecdysozoa;Nematoda;Chromadorea;Ascaridida;Ascaridoidea;Ascarididae;Ascaris;Ascaris suum;
0	251	Minc10860	-	-	0	-	-	-	-	0	541046619	67.04	A_suu	Ascaris suum	@Eukaryota@Metazoa	6253	;cellular organisms;Eukaryota;Opisthokonta;Metazoa;Eumetazoa;Bilateria;Protostomia;Ecdysozoa;Nematoda;Chromadorea;Ascaridida;Ascaridoidea;Ascarididae;Ascaris;Ascaris suum;
0	250	Minc05496	-	-	2e-14	-	-	-	2e-14	2e-14	343429910	29.84	Spori	Sporisorium reilianum SRZ2	@Eukaryota@Fungi	999809	;cellular organisms;Eukaryota;Opisthokonta;Fungi;Dikarya;Basidiomycota;Ustilaginomycotina;Ustilaginomycetes;Ustilaginales;Ustilaginaceae;Sporisorium;Sporisorium reilianum;Sporisorium reilianum SRZ2;
0	250	Minc05501	-	-	0	-	-	-	0	0	17542558	74.69	C_ele	Caenorhabditis elegans	@Eukaryota@Metazoa	6239	;cellular organisms;Eukaryota;Opisthokonta;Metazoa;Eumetazoa;Bilateria;Protostomia;Ecdysozoa;Nematoda;Chromadorea;Rhabditida;Rhabditoidea;Rhabditidae;Peloderinae;Caenorhabditis;Caenorhabditis elegans;
0	250	Minc13910	-	-	3e-11	-	-	-	-	3e-11	321475933	47.54	D_pul	Daphnia pulex	@Eukaryota@Metazoa	6669	;cellular organisms;Eukaryota;Opisthokonta;Metazoa;Eumetazoa;Bilateria;Protostomia;Ecdysozoa;Panarthropoda;Arthropoda;Mandibulata;Pancrustacea;Crustacea;Branchiopoda;Phyllopoda;Diplostraca;Cladocera;Anomopoda;Daphniidae;Daphnia;Daphnia pulex;
0	3	Minc17182	-	-	-	-	-	-	-	-	-	-	-	-	-	-	-
0	250	Minc06451	-	-	0	-	-	-	0	0	541041073	56.12	A_suu	Ascaris suum	@Eukaryota@Metazoa	6253	;cellular organisms;Eukaryota;Opisthokonta;Metazoa;Eumetazoa;Bilateria;Protostomia;Ecdysozoa;Nematoda;Chromadorea;Ascaridida;Ascaridoidea;Ascarididae;Ascaris;Ascaris suum;
0	250	Minc05086	-	-	0	-	-	-	-	0	560135801	62.98	H_con	Haemonchus contortus	@Eukaryota@Metazoa	6289	;cellular organisms;Eukaryota;Opisthokonta;Metazoa;Eumetazoa;Bilateria;Protostomia;Ecdysozoa;Nematoda;Chromadorea;Rhabditida;Strongylida;Trichostrongyloidea;Haemonchidae;Haemonchinae;Haemonchus;Haemonchus contortus;
0	253	Minc10021	-	-	0	-	-	0	-	0	541041734	74.41	A_suu	Ascaris suum	@Eukaryota@Metazoa	6253	;cellular organisms;Eukaryota;Opisthokonta;Metazoa;Eumetazoa;Bilateria;Protostomia;Ecdysozoa;Nematoda;Chromadorea;Ascaridida;Ascaridoidea;Ascarididae;Ascaris;Ascaris suum;
0	251	Minc13731a	-	-	0	-	-	0	-	0	393907390	57.8	L_loa	Loa loa	@Eukaryota@Metazoa	7209	;cellular organisms;Eukaryota;Opisthokonta;Metazoa;Eumetazoa;Bilateria;Protostomia;Ecdysozoa;Nematoda;Chromadorea;Spirurida;Filarioidea;Onchocercidae;Loa;Loa loa;
0	250	Minc01398	-	-	0	-	-	-	-	0	306922435	89.49	D_mel	Drosophila melanogaster	@Eukaryota@Metazoa	7227	;cellular organisms;Eukaryota;Opisthokonta;Metazoa;Eumetazoa;Bilateria;Protostomia;Ecdysozoa;Panarthropoda;Arthropoda;Mandibulata;Pancrustacea;Hexapoda;Insecta;Dicondylia;Pterygota;Neoptera;Holometabola;Diptera;Brachycera;Muscomorpha;Eremoneura;Cyclorrhapha;Schizophora;Acalyptratae;Ephydroidea;Drosophilidae;Drosophilinae;Drosophilini;Drosophila;Sophophora;melanogaster group;melanogaster subgroup;…
0	250	Minc16573	-	0	-	-	-	-	-	0	541047999	79.12	A_suu	Ascaris suum	@Eukaryota@Metazoa	6253	;cellular organisms;Eukaryota;Opisthokonta;Metazoa;Eumetazoa;Bilateria;Protostomia;Ecdysozoa;Nematoda;Chromadorea;Ascaridida;Ascaridoidea;Ascarididae;Ascaris;Ascaris suum;
0	86	Minc09760	-	-	1e-08	-	-	-	1e-08	1e-08	599372596	35.09	Melam	Melampsora larici-populina 98AG31	@Eukaryota@Fungi	747676	;cellular organisms;Eukaryota;Opisthokonta;Fungi;Dikarya;Basidiomycota;Pucciniomycotina;Pucciniomycetes;Pucciniales;Melampsoraceae;Melampsora;Melampsora larici-populina;Melampsora larici-populina 98AG31;
0	250	Minc09762	-	-	0	-	-	-	-	0	541046353	69.25	A_suu	Ascaris suum	@Eukaryota@Metazoa	6253	;cellular organisms;Eukaryota;Opisthokonta;Metazoa;Eumetazoa;Bilateria;Protostomia;Ecdysozoa;Nematoda;Chromadorea;Ascaridida;Ascaridoidea;Ascarididae;Ascaris;Ascaris suum;
0	250	Minc19156	-	-	0	-	-	-	-	0	597878987	83.75	A_cey	Ancylostoma ceylanicum	@Eukaryota@Metazoa	53326	;cellular organisms;Eukaryota;Opisthokonta;Metazoa;Eumetazoa;Bilateria;Protostomia;Ecdysozoa;Nematoda;Chromadorea;Rhabditida;Strongylida;Ancylostomatoidea;Ancylostomatidae;Ancylostomatinae;Ancylostoma;Ancylostoma ceylanicum;
0	250	Minc18154	-	-	0	-	-	0	-	0	170595600	92.15	B_mal	Brugia malayi	@Eukaryota@Metazoa	6279	;cellular organisms;Eukaryota;Opisthokonta;Metazoa;Eumetazoa;Bilateria;Protostomia;Ecdysozoa;Nematoda;Chromadorea;Spirurida;Filarioidea;Onchocercidae;Brugia;Brugia malayi;
0	1	Minc15017	-	-	-	-	-	-	-	-	-	-	-	-	-	-	-
0	251	Minc15908	-	-	0	-	-	-	-	0	541044080	68.93	A_suu	Ascaris suum	@Eukaryota@Metazoa	6253	;cellular organisms;Eukaryota;Opisthokonta;Metazoa;Eumetazoa;Bilateria;Protostomia;Ecdysozoa;Nematoda;Chromadorea;Ascaridida;Ascaridoidea;Ascarididae;Ascaris;Ascaris suum;
0	250	Minc03177	-	-	0	-	-	0	-	0	170595600	92.15	B_mal	Brugia malayi	@Eukaryota@Metazoa	6279	;cellular organisms;Eukaryota;Opisthokonta;Metazoa;Eumetazoa;Bilateria;Protostomia;Ecdysozoa;Nematoda;Chromadorea;Spirurida;Filarioidea;Onchocercidae;Brugia;Brugia malayi;
0	251	Minc03178	-	-	0	-	-	-	-	0	170595600	74.73	B_mal	Brugia malayi	@Eukaryota@Metazoa	6279	;cellular organisms;Eukaryota;Opisthokonta;Metazoa;Eumetazoa;Bilateria;Protostomia;Ecdysozoa;Nematoda;Chromadorea;Spirurida;Filarioidea;Onchocercidae;Brugia;Brugia malayi;
0	2	Minc11770	-	-	-	-	-	-	-	-	-	-	-	-	-	-	-
0	250	Minc11773a	-	-	0	-	-	0	-	0	560138144	86.46	H_con	Haemonchus contortus	@Eukaryota@Metazoa	6289	;cellular organisms;Eukaryota;Opisthokonta;Metazoa;Eumetazoa;Bilateria;Protostomia;Ecdysozoa;Nematoda;Chromadorea;Rhabditida;Strongylida;Trichostrongyloidea;Haemonchidae;Haemonchinae;Haemonchus;Haemonchus contortus;
0	250	Minc11773b	-	-	0	-	-	0	-	0	560138144	86.46	H_con	Haemonchus contortus	@Eukaryota@Metazoa	6289	;cellular organisms;Eukaryota;Opisthokonta;Metazoa;Eumetazoa;Bilateria;Protostomia;Ecdysozoa;Nematoda;Chromadorea;Rhabditida;Strongylida;Trichostrongyloidea;Haemonchidae;Haemonchinae;Haemonchus;Haemonchus contortus;
0	1	Minc04991	-	-	-	-	-	-	-	-	-	-	-	-	-	-	-
0	483	Minc13151	-	-	0	-	-	0	-	0	597882268	59.67	A_cey	Ancylostoma ceylanicum	@Eukaryota@Metazoa	53326	;cellular organisms;Eukaryota;Opisthokonta;Metazoa;Eumetazoa;Bilateria;Protostomia;Ecdysozoa;Nematoda;Chromadorea;Rhabditida;Strongylida;Ancylostomatoidea;Ancylostomatidae;Ancylostomatinae;Ancylostoma;Ancylostoma ceylanicum;
0	253	Minc10936	-	-	0	-	-	-	-	0	268537122	57.07	C_bri	Caenorhabditis briggsae	@Eukaryota@Metazoa	6238	;cellular organisms;Eukaryota;Opisthokonta;Metazoa;Eumetazoa;Bilateria;Protostomia;Ecdysozoa;Nematoda;Chromadorea;Rhabditida;Rhabditoidea;Rhabditidae;Peloderinae;Caenorhabditis;Caenorhabditis briggsae;
0	434	Minc17133	-	-	0	-	-	-	0	0	541041074	70.45	A_suu	Ascaris suum	@Eukaryota@Metazoa	6253	;cellular organisms;Eukaryota;Opisthokonta;Metazoa;Eumetazoa;Bilateria;Protostomia;Ecdysozoa;Nematoda;Chromadorea;Ascaridida;Ascaridoidea;Ascarididae;Ascaris;Ascaris suum;
0	288	Minc07240	-	-	0	-	-	-	-	0	307212219	37.11	H_sal	Harpegnathos saltator	@Eukaryota@Metazoa	610380	;cellular organisms;Eukaryota;Opisthokonta;Metazoa;Eumetazoa;Bilateria;Protostomia;Ecdysozoa;Panarthropoda;Arthropoda;Mandibulata;Pancrustacea;Hexapoda;Insecta;Dicondylia;Pterygota;Neoptera;Holometabola;Hymenoptera;Apocrita;Aculeata;Vespoidea;Formicidae;Ponerinae;Ponerini;Harpegnathos;Harpegnathos saltator;
0	1	Minc04178	-	-	-	-	-	-	-	-	-	-	-	-	-	-	-
0	1	Minc04181	-	-	-	-	-	-	-	-	-	-	-	-	-	-	-
0	251	Minc04189	-	-	0	-	-	-	-	0	541048277	66.27	A_suu	Ascaris suum	@Eukaryota@Metazoa	6253	;cellular organisms;Eukaryota;Opisthokonta;Metazoa;Eumetazoa;Bilateria;Protostomia;Ecdysozoa;Nematoda;Chromadorea;Ascaridida;Ascaridoidea;Ascarididae;Ascaris;Ascaris suum;
0	250	Minc17529	-	-	0	-	-	-	0	0	17533571	63.38	C_ele	Caenorhabditis elegans	@Eukaryota@Metazoa	6239	;cellular organisms;Eukaryota;Opisthokonta;Metazoa;Eumetazoa;Bilateria;Protostomia;Ecdysozoa;Nematoda;Chromadorea;Rhabditida;Rhabditoidea;Rhabditidae;Peloderinae;Caenorhabditis;Caenorhabditis elegans;
0	303	Minc09389	-	-	2e-11	-	-	2e-11	-	2e-11	4587536	42.11	A_tha	Arabidopsis thaliana	@Eukaryota@Viridiplantae	3702	;cellular organisms;Eukaryota;Viridiplantae;Streptophyta;Streptophytina;Embryophyta;Tracheophyta;Euphyllophyta;Spermatophyta;Magnoliophyta;Mesangiospermae;eudicotyledons;Gunneridae;Pentapetalae;rosids;malvids;Brassicales;Brassicaceae;Camelineae;Arabidopsis;Arabidopsis thaliana;
0	81	Minc10365	-	-	-	-	-	-	-	-	-	-	-	-	-	-	-
0	143	Minc10366	-	-	-	-	-	-	-	-	-	-	-	-	-	-	-
0	11	Minc06482	-	-	-	-	-	-	-	-	-	-	-	-	-	-	-
0	5	Minc06488	-	-	-	-	-	-	-	-	-	-	-	-	-	-	-
0	11	Minc06489	-	-	-	-	-	-	-	-	-	-	-	-	-	-	-
0	10	Minc06490	-	-	-	-	-	-	-	-	-	-	-	-	-	-	-
0	11	Minc06491	-	-	-	-	-	-	-	-	-	-	-	-	-	-	-
0	10	Minc06492	-	-	-	-	-	-	-	-	-	-	-	-	-	-	-
0	1	Minc06502	-	-	-	-	-	-	-	-	-	-	-	-	-	-	-
0	256	Minc01649	-	-	0	-	-	-	-	0	541044401	72.16	A_suu	Ascaris suum	@Eukaryota@Metazoa	6253	;cellular organisms;Eukaryota;Opisthokonta;Metazoa;Eumetazoa;Bilateria;Protostomia;Ecdysozoa;Nematoda;Chromadorea;Ascaridida;Ascaridoidea;Ascarididae;Ascaris;Ascaris suum;
0	250	Minc01651	-	-	0	-	-	-	-	0	541042998	90.6	A_suu	Ascaris suum	@Eukaryota@Metazoa	6253	;cellular organisms;Eukaryota;Opisthokonta;Metazoa;Eumetazoa;Bilateria;Protostomia;Ecdysozoa;Nematoda;Chromadorea;Ascaridida;Ascaridoidea;Ascarididae;Ascaris;Ascaris suum;
0	251	Minc01667	-	-	1e-38	-	-	-	-	1e-38	219111525	51.32	Phaeo	Phaeodactylum tricornutum CCAP 1055/1	@Eukaryota	556484	;cellular organisms;Eukaryota;Stramenopiles;Bacillariophyta;Bacillariophyceae;Bacillariophycidae;Naviculales;Phaeodactylaceae;Phaeodactylum;Phaeodactylum tricornutum;Phaeodactylum tricornutum CCAP 1055/1;
0	1	Minc01678	-	-	-	-	-	-	-	-	-	-	-	-	-	-	-
0	250	Minc06034	-	-	0	-	-	0	-	0	170592987	82.8	B_mal	Brugia malayi	@Eukaryota@Metazoa	6279	;cellular organisms;Eukaryota;Opisthokonta;Metazoa;Eumetazoa;Bilateria;Protostomia;Ecdysozoa;Nematoda;Chromadorea;Spirurida;Filarioidea;Onchocercidae;Brugia;Brugia malayi;
0	250	Minc06048	-	-	0	-	-	-	-	0	560117494	85.34	H_con	Haemonchus contortus	@Eukaryota@Metazoa	6289	;cellular organisms;Eukaryota;Opisthokonta;Metazoa;Eumetazoa;Bilateria;Protostomia;Ecdysozoa;Nematoda;Chromadorea;Rhabditida;Strongylida;Trichostrongyloidea;Haemonchidae;Haemonchinae;Haemonchus;Haemonchus contortus;
0	2	Minc16736	-	-	-	-	-	-	-	-	-	-	-	-	-	-	-
0	250	Minc16484	-	-	0	-	-	-	0	0	597850708	76.73	A_cey	Ancylostoma ceylanicum	@Eukaryota@Metazoa	53326	;cellular organisms;Eukaryota;Opisthokonta;Metazoa;Eumetazoa;Bilateria;Protostomia;Ecdysozoa;Nematoda;Chromadorea;Rhabditida;Strongylida;Ancylostomatoidea;Ancylostomatidae;Ancylostomatinae;Ancylostoma;Ancylostoma ceylanicum;
0	250	Minc16487a	-	-	0	-	-	-	0	0	1350745	86.65	T_can	Toxocara canis	@Eukaryota@Metazoa	6265	;cellular organisms;Eukaryota;Opisthokonta;Metazoa;Eumetazoa;Bilateria;Protostomia;Ecdysozoa;Nematoda;Chromadorea;Ascaridida;Ascaridoidea;Toxocaridae;Toxocara;Toxocara canis;
0	251	Minc03038	-	-	0	-	-	0	-	0	170589273	68.62	B_mal	Brugia malayi	@Eukaryota@Metazoa	6279	;cellular organisms;Eukaryota;Opisthokonta;Metazoa;Eumetazoa;Bilateria;Protostomia;Ecdysozoa;Nematoda;Chromadorea;Spirurida;Filarioidea;Onchocercidae;Brugia;Brugia malayi;
0	432	Minc03048	-	-	0	-	-	-	-	0	635086640	66.52	C_sab	Chlorocebus sabaeus	@Eukaryota@Metazoa	60711	;cellular organisms;Eukaryota;Opisthokonta;Metazoa;Eumetazoa;Bilateria;Deuterostomia;Chordata;Craniata;Vertebrata;Gnathostomata;Teleostomi;Euteleostomi;Sarcopterygii;Dipnotetrapodomorpha;Tetrapoda;Amniota;Mammalia;Theria;Eutheria;Boreoeutheria;Euarchontoglires;Primates;Haplorrhini;Simiiformes;Catarrhini;Cercopithecoidea;Cercopithecidae;Cercopithecinae;Chlorocebus;Chlorocebus sabaeus;
0	250	Minc03051	-	-	0	-	-	-	-	0	541042998	95.64	A_suu	Ascaris suum	@Eukaryota@Metazoa	6253	;cellular organisms;Eukaryota;Opisthokonta;Metazoa;Eumetazoa;Bilateria;Protostomia;Ecdysozoa;Nematoda;Chromadorea;Ascaridida;Ascaridoidea;Ascarididae;Ascaris;Ascaris suum;
0	251	Minc09675	-	-	0	-	-	-	-	0	541048277	65.92	A_suu	Ascaris suum	@Eukaryota@Metazoa	6253	;cellular organisms;Eukaryota;Opisthokonta;Metazoa;Eumetazoa;Bilateria;Protostomia;Ecdysozoa;Nematoda;Chromadorea;Ascaridida;Ascaridoidea;Ascarididae;Ascaris;Ascaris suum;
0	250	Minc03802	-	-	0	-	-	-	-	0	597844725	60.04	A_cey	Ancylostoma ceylanicum	@Eukaryota@Metazoa	53326	;cellular organisms;Eukaryota;Opisthokonta;Metazoa;Eumetazoa;Bilateria;Protostomia;Ecdysozoa;Nematoda;Chromadorea;Rhabditida;Strongylida;Ancylostomatoidea;Ancylostomatidae;Ancylostomatinae;Ancylostoma;Ancylostoma ceylanicum;
0	251	Minc03344	-	-	0	-	-	-	-	0	541047854	66.95	A_suu	Ascaris suum	@Eukaryota@Metazoa	6253	;cellular organisms;Eukaryota;Opisthokonta;Metazoa;Eumetazoa;Bilateria;Protostomia;Ecdysozoa;Nematoda;Chromadorea;Ascaridida;Ascaridoidea;Ascarididae;Ascaris;Ascaris suum;
0	3	Minc03366a	-	-	-	-	-	-	-	-	-	-	-	-	-	-	-
0	3	Minc03366b	-	-	-	-	-	-	-	-	-	-	-	-	-	-	-
0	254	Minc03377	-	-	0	-	-	0	-	0	541041734	74.05	A_suu	Ascaris suum	@Eukaryota@Metazoa	6253	;cellular organisms;Eukaryota;Opisthokonta;Metazoa;Eumetazoa;Bilateria;Protostomia;Ecdysozoa;Nematoda;Chromadorea;Ascaridida;Ascaridoidea;Ascarididae;Ascaris;Ascaris suum;
0	3	Minc10807	-	-	-	-	-	-	-	-	-	-	-	-	-	-	-
0	250	Minc15577	-	-	0	-	-	-	-	0	402588561	83.83	W_ban	Wuchereria bancrofti	@Eukaryota@Metazoa	6293	;cellular organisms;Eukaryota;Opisthokonta;Metazoa;Eumetazoa;Bilateria;Protostomia;Ecdysozoa;Nematoda;Chromadorea;Spirurida;Filarioidea;Onchocercidae;Wuchereria;Wuchereria bancrofti;
0	250	Minc17094	-	-	0	-	-	-	-	0	597878987	83.75	A_cey	Ancylostoma ceylanicum	@Eukaryota@Metazoa	53326	;cellular organisms;Eukaryota;Opisthokonta;Metazoa;Eumetazoa;Bilateria;Protostomia;Ecdysozoa;Nematoda;Chromadorea;Rhabditida;Strongylida;Ancylostomatoidea;Ancylostomatidae;Ancylostomatinae;Ancylostoma;Ancylostoma ceylanicum;
0	496	Minc04351	-	-	0	-	-	-	-	0	597877657	75.62	A_cey	Ancylostoma ceylanicum	@Eukaryota@Metazoa	53326	;cellular organisms;Eukaryota;Opisthokonta;Metazoa;Eumetazoa;Bilateria;Protostomia;Ecdysozoa;Nematoda;Chromadorea;Rhabditida;Strongylida;Ancylostomatoidea;Ancylostomatidae;Ancylostomatinae;Ancylostoma;Ancylostoma ceylanicum;
0	250	Minc02217	-	-	0	-	-	-	-	0	402591154	59.87	W_ban	Wuchereria bancrofti	@Eukaryota@Metazoa	6293	;cellular organisms;Eukaryota;Opisthokonta;Metazoa;Eumetazoa;Bilateria;Protostomia;Ecdysozoa;Nematoda;Chromadorea;Spirurida;Filarioidea;Onchocercidae;Wuchereria;Wuchereria bancrofti;
0	268	Minc02229	-	-	0	-	-	-	-	0	393907054	45.77	L_loa	Loa loa	@Eukaryota@Metazoa	7209	;cellular organisms;Eukaryota;Opisthokonta;Metazoa;Eumetazoa;Bilateria;Protostomia;Ecdysozoa;Nematoda;Chromadorea;Spirurida;Filarioidea;Onchocercidae;Loa;Loa loa;
0	4	Minc02235	-	-	-	-	-	-	-	-	-	-	-	-	-	-	-
0	250	Minc02244	-	-	0	-	-	-	-	0	541049132	64.71	A_suu	Ascaris suum	@Eukaryota@Metazoa	6253	;cellular organisms;Eukaryota;Opisthokonta;Metazoa;Eumetazoa;Bilateria;Protostomia;Ecdysozoa;Nematoda;Chromadorea;Ascaridida;Ascaridoidea;Ascarididae;Ascaris;Ascaris suum;
0	250	Minc15812	-	-	0	-	-	-	0	0	268576106	73.01	C_bri	Caenorhabditis briggsae	@Eukaryota@Metazoa	6238	;cellular organisms;Eukaryota;Opisthokonta;Metazoa;Eumetazoa;Bilateria;Protostomia;Ecdysozoa;Nematoda;Chromadorea;Rhabditida;Rhabditoidea;Rhabditidae;Peloderinae;Caenorhabditis;Caenorhabditis briggsae;
0	1	Minc13515	-	-	-	-	-	-	-	-	-	-	-	-	-	-	-
0	250	Minc12165	-	-	0	-	-	-	-	0	560117835	65.34	H_con	Haemonchus contortus	@Eukaryota@Metazoa	6289	;cellular organisms;Eukaryota;Opisthokonta;Metazoa;Eumetazoa;Bilateria;Protostomia;Ecdysozoa;Nematoda;Chromadorea;Rhabditida;Strongylida;Trichostrongyloidea;Haemonchidae;Haemonchinae;Haemonchus;Haemonchus contortus;
0	1	Minc09818	-	-	-	-	-	-	-	-	-	-	-	-	-	-	-
0	250	Minc12788	-	-	0	-	-	0	-	0	170587320	66	B_mal	Brugia malayi	@Eukaryota@Metazoa	6279	;cellular organisms;Eukaryota;Opisthokonta;Metazoa;Eumetazoa;Bilateria;Protostomia;Ecdysozoa;Nematoda;Chromadorea;Spirurida;Filarioidea;Onchocercidae;Brugia;Brugia malayi;
0	251	Minc04068	-	-	0	-	-	-	0	0	597745544	72.46	A_mex	Astyanax mexicanus	@Eukaryota@Metazoa	7994	;cellular organisms;Eukaryota;Opisthokonta;Metazoa;Eumetazoa;Bilateria;Deuterostomia;Chordata;Craniata;Vertebrata;Gnathostomata;Teleostomi;Euteleostomi;Actinopterygii;Actinopteri;Neopterygii;Teleostei;Osteoglossocephalai;Clupeocephala;Otomorpha;Ostariophysi;Otophysi;Characiphysae;Characiformes;Characoidei;Characidae;Characidae incertae sedis;Astyanax clade;Astyanax;Astyanax mexicanus;
0	250	Minc12411	-	-	0	-	-	0	-	0	170587204	70	B_mal	Brugia malayi	@Eukaryota@Metazoa	6279	;cellular organisms;Eukaryota;Opisthokonta;Metazoa;Eumetazoa;Bilateria;Protostomia;Ecdysozoa;Nematoda;Chromadorea;Spirurida;Filarioidea;Onchocercidae;Brugia;Brugia malayi;
0	250	Minc14684	-	-	0	-	-	0	-	0	393907075	89.01	L_loa	Loa loa	@Eukaryota@Metazoa	7209	;cellular organisms;Eukaryota;Opisthokonta;Metazoa;Eumetazoa;Bilateria;Protostomia;Ecdysozoa;Nematoda;Chromadorea;Spirurida;Filarioidea;Onchocercidae;Loa;Loa loa;
0	250	Minc09160	-	-	1e-21	-	-	1e-21	-	1e-21	145350487	57.97	Ostre	Ostreococcus lucimarinus CCE9901	@Eukaryota@Viridiplantae	436017	;cellular organisms;Eukaryota;Viridiplantae;Chlorophyta;prasinophytes;Mamiellophyceae;Mamiellales;Bathycoccaceae;Ostreococcus;Ostreococcus 'lucimarinus';Ostreococcus lucimarinus CCE9901;
0	2	Minc00777	-	-	-	-	-	-	-	-	-	-	-	-	-	-	-
0	250	Minc06929	-	-	0	-	-	-	0	0	597885009	69.27	A_cey	Ancylostoma ceylanicum	@Eukaryota@Metazoa	53326	;cellular organisms;Eukaryota;Opisthokonta;Metazoa;Eumetazoa;Bilateria;Protostomia;Ecdysozoa;Nematoda;Chromadorea;Rhabditida;Strongylida;Ancylostomatoidea;Ancylostomatidae;Ancylostomatinae;Ancylostoma;Ancylostoma ceylanicum;
0	369	Minc06935a	-	-	0	-	-	-	0	0	312069580	52.48	L_loa	Loa loa	@Eukaryota@Metazoa	7209	;cellular organisms;Eukaryota;Opisthokonta;Metazoa;Eumetazoa;Bilateria;Protostomia;Ecdysozoa;Nematoda;Chromadorea;Spirurida;Filarioidea;Onchocercidae;Loa;Loa loa;
0	250	Minc14304a	-	-	0	-	-	-	-	0	393905541	70.58	L_loa	Loa loa	@Eukaryota@Metazoa	7209	;cellular organisms;Eukaryota;Opisthokonta;Metazoa;Eumetazoa;Bilateria;Protostomia;Ecdysozoa;Nematoda;Chromadorea;Spirurida;Filarioidea;Onchocercidae;Loa;Loa loa;
0	250	Minc08427	-	-	0	-	-	-	0	0	541041073	59.46	A_suu	Ascaris suum	@Eukaryota@Metazoa	6253	;cellular organisms;Eukaryota;Opisthokonta;Metazoa;Eumetazoa;Bilateria;Protostomia;Ecdysozoa;Nematoda;Chromadorea;Ascaridida;Ascaridoidea;Ascarididae;Ascaris;Ascaris suum;
0	253	Minc11379	-	-	0	-	-	-	-	0	541046619	67.81	A_suu	Ascaris suum	@Eukaryota@Metazoa	6253	;cellular organisms;Eukaryota;Opisthokonta;Metazoa;Eumetazoa;Bilateria;Protostomia;Ecdysozoa;Nematoda;Chromadorea;Ascaridida;Ascaridoidea;Ascarididae;Ascaris;Ascaris suum;
0	2	Minc05283	-	-	-	-	-	-	-	-	-	-	-	-	-	-	-
0	1	Minc09110	-	-	-	-	-	-	-	-	-	-	-	-	-	-	-
0	250	Minc09112	-	-	0	-	-	-	0	0	541047209	72.54	A_suu	Ascaris suum	@Eukaryota@Metazoa	6253	;cellular organisms;Eukaryota;Opisthokonta;Metazoa;Eumetazoa;Bilateria;Protostomia;Ecdysozoa;Nematoda;Chromadorea;Ascaridida;Ascaridoidea;Ascarididae;Ascaris;Ascaris suum;
0	250	Minc09128	-	-	0	-	-	0	-	0	541047153	77.62	A_suu	Ascaris suum	@Eukaryota@Metazoa	6253	;cellular organisms;Eukaryota;Opisthokonta;Metazoa;Eumetazoa;Bilateria;Protostomia;Ecdysozoa;Nematoda;Chromadorea;Ascaridida;Ascaridoidea;Ascarididae;Ascaris;Ascaris suum;
0	250	Minc15807	-	-	0	-	-	-	-	0	560117521	74.93	H_con	Haemonchus contortus	@Eukaryota@Metazoa	6289	;cellular organisms;Eukaryota;Opisthokonta;Metazoa;Eumetazoa;Bilateria;Protostomia;Ecdysozoa;Nematoda;Chromadorea;Rhabditida;Strongylida;Trichostrongyloidea;Haemonchidae;Haemonchinae;Haemonchus;Haemonchus contortus;
0	1	Minc02097	-	-	-	-	-	-	-	-	-	-	-	-	-	-	-
0	250	Minc15741	-	-	0	-	-	-	-	0	312066526	58.42	L_loa	Loa loa	@Eukaryota@Metazoa	7209	;cellular organisms;Eukaryota;Opisthokonta;Metazoa;Eumetazoa;Bilateria;Protostomia;Ecdysozoa;Nematoda;Chromadorea;Spirurida;Filarioidea;Onchocercidae;Loa;Loa loa;
0	250	Minc06351	-	-	0	-	-	-	-	0	597851269	63.73	A_cey	Ancylostoma ceylanicum	@Eukaryota@Metazoa	53326	;cellular organisms;Eukaryota;Opisthokonta;Metazoa;Eumetazoa;Bilateria;Protostomia;Ecdysozoa;Nematoda;Chromadorea;Rhabditida;Strongylida;Ancylostomatoidea;Ancylostomatidae;Ancylostomatinae;Ancylostoma;Ancylostoma ceylanicum;
0	250	Minc06367	-	-	0	-	-	-	-	0	18389427	71.62	A_suu	Ascaris suum	@Eukaryota@Metazoa	6253	;cellular organisms;Eukaryota;Opisthokonta;Metazoa;Eumetazoa;Bilateria;Protostomia;Ecdysozoa;Nematoda;Chromadorea;Ascaridida;Ascaridoidea;Ascarididae;Ascaris;Ascaris suum;
0	250	Minc06368b	-	-	0	-	-	-	-	0	18389427	70.02	A_suu	Ascaris suum	@Eukaryota@Metazoa	6253	;cellular organisms;Eukaryota;Opisthokonta;Metazoa;Eumetazoa;Bilateria;Protostomia;Ecdysozoa;Nematoda;Chromadorea;Ascaridida;Ascaridoidea;Ascarididae;Ascaris;Ascaris suum;
0	252	Minc02281	-	-	0	-	-	-	-	0	560118420	73.58	H_con	Haemonchus contortus	@Eukaryota@Metazoa	6289	;cellular organisms;Eukaryota;Opisthokonta;Metazoa;Eumetazoa;Bilateria;Protostomia;Ecdysozoa;Nematoda;Chromadorea;Rhabditida;Strongylida;Trichostrongyloidea;Haemonchidae;Haemonchinae;Haemonchus;Haemonchus contortus;
0	254	Minc02286	-	-	0	-	-	-	0	0	597854166	55.49	A_cey	Ancylostoma ceylanicum	@Eukaryota@Metazoa	53326	;cellular organisms;Eukaryota;Opisthokonta;Metazoa;Eumetazoa;Bilateria;Protostomia;Ecdysozoa;Nematoda;Chromadorea;Rhabditida;Strongylida;Ancylostomatoidea;Ancylostomatidae;Ancylostomatinae;Ancylostoma;Ancylostoma ceylanicum;
0	2	Minc06679	-	-	-	-	-	-	-	-	-	-	-	-	-	-	-
0	701	Minc10520	-	-	0	-	-	0	-	0	170581274	49.56	B_mal	Brugia malayi	@Eukaryota@Metazoa	6279	;cellular organisms;Eukaryota;Opisthokonta;Metazoa;Eumetazoa;Bilateria;Protostomia;Ecdysozoa;Nematoda;Chromadorea;Spirurida;Filarioidea;Onchocercidae;Brugia;Brugia malayi;
0	250	Minc13117	-	-	0	-	-	-	-	0	439735	91.57	H_con	Haemonchus contortus	@Eukaryota@Metazoa	6289	;cellular organisms;Eukaryota;Opisthokonta;Metazoa;Eumetazoa;Bilateria;Protostomia;Ecdysozoa;Nematoda;Chromadorea;Rhabditida;Strongylida;Trichostrongyloidea;Haemonchidae;Haemonchinae;Haemonchus;Haemonchus contortus;
0	250	Minc13121	-	-	0	-	-	-	-	0	439735	93.01	H_con	Haemonchus contortus	@Eukaryota@Metazoa	6289	;cellular organisms;Eukaryota;Opisthokonta;Metazoa;Eumetazoa;Bilateria;Protostomia;Ecdysozoa;Nematoda;Chromadorea;Rhabditida;Strongylida;Trichostrongyloidea;Haemonchidae;Haemonchinae;Haemonchus;Haemonchus contortus;
0	478	Minc14983	-	-	0	-	-	-	0	0	560118489	60.86	H_con	Haemonchus contortus	@Eukaryota@Metazoa	6289	;cellular organisms;Eukaryota;Opisthokonta;Metazoa;Eumetazoa;Bilateria;Protostomia;Ecdysozoa;Nematoda;Chromadorea;Rhabditida;Strongylida;Trichostrongyloidea;Haemonchidae;Haemonchinae;Haemonchus;Haemonchus contortus;
0	250	Minc17543	-	-	1e-37	-	-	1e-37	-	1e-37	195617544	98.53	Z_may	Zea mays	@Eukaryota@Viridiplantae	4577	;cellular organisms;Eukaryota;Viridiplantae;Streptophyta;Streptophytina;Embryophyta;Tracheophyta;Euphyllophyta;Spermatophyta;Magnoliophyta;Mesangiospermae;Liliopsida;Petrosaviidae;commelinids;Poales;Poaceae;PACMAD clade;Panicoideae;Andropogonodae;Andropogoneae;Tripsacinae;Zea;Zea mays;
0	251	Minc00474	-	-	0	-	-	0	-	0	541044733	60.5	A_suu	Ascaris suum	@Eukaryota@Metazoa	6253	;cellular organisms;Eukaryota;Opisthokonta;Metazoa;Eumetazoa;Bilateria;Protostomia;Ecdysozoa;Nematoda;Chromadorea;Ascaridida;Ascaridoidea;Ascarididae;Ascaris;Ascaris suum;
0	3	Minc12379	-	-	-	-	-	-	-	-	-	-	-	-	-	-	-
0	10	Minc12380	-	-	-	-	-	-	-	-	-	-	-	-	-	-	-
0	254	Minc06582	-	-	0	-	-	-	-	0	597881245	63.93	A_cey	Ancylostoma ceylanicum	@Eukaryota@Metazoa	53326	;cellular organisms;Eukaryota;Opisthokonta;Metazoa;Eumetazoa;Bilateria;Protostomia;Ecdysozoa;Nematoda;Chromadorea;Rhabditida;Strongylida;Ancylostomatoidea;Ancylostomatidae;Ancylostomatinae;Ancylostoma;Ancylostoma ceylanicum;
0	1	Minc13637	-	-	-	-	-	-	-	-	-	-	-	-	-	-	-
0	250	Minc01244	-	-	0	-	-	0	-	0	170592987	82.8	B_mal	Brugia malayi	@Eukaryota@Metazoa	6279	;cellular organisms;Eukaryota;Opisthokonta;Metazoa;Eumetazoa;Bilateria;Protostomia;Ecdysozoa;Nematoda;Chromadorea;Spirurida;Filarioidea;Onchocercidae;Brugia;Brugia malayi;
0	1	Minc10155	-	-	-	-	-	-	-	-	-	-	-	-	-	-	-
0	1	Minc10160	-	-	-	-	-	-	-	-	-	-	-	-	-	-	-
0	355	Minc17322	-	-	0	-	-	0	-	0	541042128	65.42	A_suu	Ascaris suum	@Eukaryota@Metazoa	6253	;cellular organisms;Eukaryota;Opisthokonta;Metazoa;Eumetazoa;Bilateria;Protostomia;Ecdysozoa;Nematoda;Chromadorea;Ascaridida;Ascaridoidea;Ascarididae;Ascaris;Ascaris suum;
0	250	Minc04216	-	-	0	-	-	-	-	0	312071167	63.09	L_loa	Loa loa	@Eukaryota@Metazoa	7209	;cellular organisms;Eukaryota;Opisthokonta;Metazoa;Eumetazoa;Bilateria;Protostomia;Ecdysozoa;Nematoda;Chromadorea;Spirurida;Filarioidea;Onchocercidae;Loa;Loa loa;
0	513	Minc04234	-	-	0	-	-	-	0	0	560118489	58.38	H_con	Haemonchus contortus	@Eukaryota@Metazoa	6289	;cellular organisms;Eukaryota;Opisthokonta;Metazoa;Eumetazoa;Bilateria;Protostomia;Ecdysozoa;Nematoda;Chromadorea;Rhabditida;Strongylida;Trichostrongyloidea;Haemonchidae;Haemonchinae;Haemonchus;Haemonchus contortus;
0	2	Minc15159	-	-	-	-	-	-	-	-	-	-	-	-	-	-	-
0	250	Minc18537	-	-	0	-	-	-	-	0	541041956	74.76	A_suu	Ascaris suum	@Eukaryota@Metazoa	6253	;cellular organisms;Eukaryota;Opisthokonta;Metazoa;Eumetazoa;Bilateria;Protostomia;Ecdysozoa;Nematoda;Chromadorea;Ascaridida;Ascaridoidea;Ascarididae;Ascaris;Ascaris suum;
0	250	Minc05950	-	-	0	-	-	-	-	0	560115287	66.74	H_con	Haemonchus contortus	@Eukaryota@Metazoa	6289	;cellular organisms;Eukaryota;Opisthokonta;Metazoa;Eumetazoa;Bilateria;Protostomia;Ecdysozoa;Nematoda;Chromadorea;Rhabditida;Strongylida;Trichostrongyloidea;Haemonchidae;Haemonchinae;Haemonchus;Haemonchus contortus;
0	1	Minc16626a	-	-	-	-	-	-	-	-	-	-	-	-	-	-	-
0	167	Minc03938	-	-	4e-07	-	-	-	-	4e-07	307173864	54.35	C_flo	Camponotus floridanus	@Eukaryota@Metazoa	104421	;cellular organisms;Eukaryota;Opisthokonta;Metazoa;Eumetazoa;Bilateria;Protostomia;Ecdysozoa;Panarthropoda;Arthropoda;Mandibulata;Pancrustacea;Hexapoda;Insecta;Dicondylia;Pterygota;Neoptera;Holometabola;Hymenoptera;Apocrita;Aculeata;Vespoidea;Formicidae;Formicinae;Camponotini;Camponotus;Camponotus floridanus;
0	3	Minc10078	-	-	-	-	-	-	-	-	-	-	-	-	-	-	-
0	3	Minc07049	-	-	-	-	-	-	-	-	-	-	-	-	-	-	-
0	1	Minc07052	-	-	-	-	-	-	-	-	-	-	-	-	-	-	-
-0.11	250	Minc04029a	-	-	1e-10	-	-	1e-10	-	9e-11	391327358	45.16	G_occ	Galendromus occidentalis	@Eukaryota@Metazoa	34638	;cellular organisms;Eukaryota;Opisthokonta;Metazoa;Eumetazoa;Bilateria;Protostomia;Ecdysozoa;Panarthropoda;Arthropoda;Chelicerata;Arachnida;Acari;Parasitiformes;Mesostigmata;Monogynaspida;Gamasina;Phytoseioidea;Phytoseiidae;Typhlodrominae;Galendromus;Galendromus occidentalis;
-0.18	308	Minc13000	-	-	6e-12	-	-	6e-12	-	5e-12	197107121	39.47	H_sap	Homo sapiens	@Eukaryota@Metazoa	9606	;cellular organisms;Eukaryota;Opisthokonta;Metazoa;Eumetazoa;Bilateria;Deuterostomia;Chordata;Craniata;Vertebrata;Gnathostomata;Teleostomi;Euteleostomi;Sarcopterygii;Dipnotetrapodomorpha;Tetrapoda;Amniota;Mammalia;Theria;Eutheria;Boreoeutheria;Euarchontoglires;Primates;Haplorrhini;Simiiformes;Catarrhini;Hominoidea;Hominidae;Homininae;Homo;Homo sapiens;
-0.18	250	Minc00177	-	-	6e-14	-	-	-	6e-14	5e-14	157136377	66.67	A_aeg	Aedes aegypti	@Eukaryota@Metazoa	7159	;cellular organisms;Eukaryota;Opisthokonta;Metazoa;Eumetazoa;Bilateria;Protostomia;Ecdysozoa;Panarthropoda;Arthropoda;Mandibulata;Pancrustacea;Hexapoda;Insecta;Dicondylia;Pterygota;Neoptera;Holometabola;Diptera;Nematocera;Culicomorpha;Culicoidea;Culicidae;Culicinae;Aedini;Aedes;Stegomyia;Aedes aegypti;
-0.22	108	Minc16150	-	-	5e-08	-	-	-	5e-08	4e-08	560116996	29.29	H_con	Haemonchus contortus	@Eukaryota@Metazoa	6289	;cellular organisms;Eukaryota;Opisthokonta;Metazoa;Eumetazoa;Bilateria;Protostomia;Ecdysozoa;Nematoda;Chromadorea;Rhabditida;Strongylida;Trichostrongyloidea;Haemonchidae;Haemonchinae;Haemonchus;Haemonchus contortus;
-0.22	250	Minc08769	-	-	5e-07	-	-	-	5e-07	4e-07	597893283	36.59	A_cey	Ancylostoma ceylanicum	@Eukaryota@Metazoa	53326	;cellular organisms;Eukaryota;Opisthokonta;Metazoa;Eumetazoa;Bilateria;Protostomia;Ecdysozoa;Nematoda;Chromadorea;Rhabditida;Strongylida;Ancylostomatoidea;Ancylostomatidae;Ancylostomatinae;Ancylostoma;Ancylostoma ceylanicum;
-0.22	26	Minc07708a	-	-	1e-05	-	-	1e-05	-	8e-06	170577875	41.67	B_mal	Brugia malayi	@Eukaryota@Metazoa	6279	;cellular organisms;Eukaryota;Opisthokonta;Metazoa;Eumetazoa;Bilateria;Protostomia;Ecdysozoa;Nematoda;Chromadorea;Spirurida;Filarioidea;Onchocercidae;Brugia;Brugia malayi;
-0.29	65	Minc02730	-	-	4e-07	-	-	4e-07	-	3e-07	391330870	27.61	G_occ	Galendromus occidentalis	@Eukaryota@Metazoa	34638	;cellular organisms;Eukaryota;Opisthokonta;Metazoa;Eumetazoa;Bilateria;Protostomia;Ecdysozoa;Panarthropoda;Arthropoda;Chelicerata;Arachnida;Acari;Parasitiformes;Mesostigmata;Monogynaspida;Gamasina;Phytoseioidea;Phytoseiidae;Typhlodrominae;Galendromus;Galendromus occidentalis;
-0.29	250	Minc14719	-	-	4e-68	-	-	4e-68	-	3e-68	312076259	52.65	L_loa	Loa loa	@Eukaryota@Metazoa	7209	;cellular organisms;Eukaryota;Opisthokonta;Metazoa;Eumetazoa;Bilateria;Protostomia;Ecdysozoa;Nematoda;Chromadorea;Spirurida;Filarioidea;Onchocercidae;Loa;Loa loa;
-0.29	4	Minc09386	-	4e-06	-	-	-	-	-	3e-06	47209458	26.97	T_nig	Tetraodon nigroviridis	@Eukaryota@Metazoa	99883	;cellular organisms;Eukaryota;Opisthokonta;Metazoa;Eumetazoa;Bilateria;Deuterostomia;Chordata;Craniata;Vertebrata;Gnathostomata;Teleostomi;Euteleostomi;Actinopterygii;Actinopteri;Neopterygii;Teleostei;Osteoglossocephalai;Clupeocephala;Euteleosteomorpha;Neoteleostei;Eurypterygia;Ctenosquamata;Acanthomorphata;Euacanthomorphacea;Percomorphaceae;Eupercaria;Tetraodontiformes;Tetraodontoidei;Tetradonto…
-0.34	250	Minc04673	-	-	7e-07	-	-	7e-07	-	5e-07	402593119	38.55	W_ban	Wuchereria bancrofti	@Eukaryota@Metazoa	6293	;cellular organisms;Eukaryota;Opisthokonta;Metazoa;Eumetazoa;Bilateria;Protostomia;Ecdysozoa;Nematoda;Chromadorea;Spirurida;Filarioidea;Onchocercidae;Wuchereria;Wuchereria bancrofti;
-0.34	250	Minc17811	-	-	7e-08	-	-	-	-	5e-08	597787623	25.76	A_mex	Astyanax mexicanus	@Eukaryota@Metazoa	7994	;cellular organisms;Eukaryota;Opisthokonta;Metazoa;Eumetazoa;Bilateria;Deuterostomia;Chordata;Craniata;Vertebrata;Gnathostomata;Teleostomi;Euteleostomi;Actinopterygii;Actinopteri;Neopterygii;Teleostei;Osteoglossocephalai;Clupeocephala;Otomorpha;Ostariophysi;Otophysi;Characiphysae;Characiformes;Characoidei;Characidae;Characidae incertae sedis;Astyanax clade;Astyanax;Astyanax mexicanus;
-0.34	251	Minc18486	-	-	7e-43	-	-	-	-	5e-43	300795392	38.93	D_rer	Danio rerio	@Eukaryota@Metazoa	7955	;cellular organisms;Eukaryota;Opisthokonta;Metazoa;Eumetazoa;Bilateria;Deuterostomia;Chordata;Craniata;Vertebrata;Gnathostomata;Teleostomi;Euteleostomi;Actinopterygii;Actinopteri;Neopterygii;Teleostei;Osteoglossocephalai;Clupeocephala;Otomorpha;Ostariophysi;Otophysi;Cypriniphysae;Cypriniformes;Cyprinoidea;Cyprinidae;Danio;Danio rerio;
-0.41	250	Minc18711	-	3e-57	-	-	-	-	-	2e-57	578359006	34.85	A_jap	Apriona japonica	@Eukaryota@Metazoa	692975	;cellular organisms;Eukaryota;Opisthokonta;Metazoa;Eumetazoa;Bilateria;Protostomia;Ecdysozoa;Panarthropoda;Arthropoda;Mandibulata;Pancrustacea;Hexapoda;Insecta;Dicondylia;Pterygota;Neoptera;Holometabola;Coleoptera;Polyphaga;Cucujiformia;Chrysomeloidea;Cerambycidae;Lamiinae;Batocerini;Apriona;Apriona japonica;
-0.41	133	Minc11059	-	-	3e-23	-	-	-	-	2e-23	560134010	38.19	H_con	Haemonchus contortus	@Eukaryota@Metazoa	6289	;cellular organisms;Eukaryota;Opisthokonta;Metazoa;Eumetazoa;Bilateria;Protostomia;Ecdysozoa;Nematoda;Chromadorea;Rhabditida;Strongylida;Trichostrongyloidea;Haemonchidae;Haemonchinae;Haemonchus;Haemonchus contortus;
-0.41	474	Minc14889	-	-	-	-	6e-13	-	-	4e-13	602674115	40.4	P_biv	Python bivittatus	@Eukaryota@Metazoa	176946	;cellular organisms;Eukaryota;Opisthokonta;Metazoa;Eumetazoa;Bilateria;Deuterostomia;Chordata;Craniata;Vertebrata;Gnathostomata;Teleostomi;Euteleostomi;Sarcopterygii;Dipnotetrapodomorpha;Tetrapoda;Amniota;Sauropsida;Sauria;Lepidosauria;Squamata;Bifurcata;Unidentata;Episquamata;Toxicofera;Serpentes;Henophidia;Pythonidae;Python;Python bivittatus;
-0.41	60	Minc10531	-	-	3e-11	-	-	-	3e-11	2e-11	405960831	29.61	C_gig	Crassostrea gigas	@Eukaryota@Metazoa	29159	;cellular organisms;Eukaryota;Opisthokonta;Metazoa;Eumetazoa;Bilateria;Protostomia;Lophotrochozoa;Mollusca;Bivalvia;Pteriomorphia;Ostreoida;Ostreoidea;Ostreidae;Crassostrea;Crassostrea gigas;
-0.41	730	Minc03897a	-	-	3e-11	-	-	-	3e-11	2e-11	46394468	35.16	P_pac	Pristionchus pacificus	@Eukaryota@Metazoa	54126	;cellular organisms;Eukaryota;Opisthokonta;Metazoa;Eumetazoa;Bilateria;Protostomia;Ecdysozoa;Nematoda;Chromadorea;Diplogasterida;Neodiplogasteridae;Pristionchus;Pristionchus pacificus;
-0.41	250	Minc07567	-	-	3e-49	-	-	-	3e-49	2e-49	560121846	91.57	H_con	Haemonchus contortus	@Eukaryota@Metazoa	6289	;cellular organisms;Eukaryota;Opisthokonta;Metazoa;Eumetazoa;Bilateria;Protostomia;Ecdysozoa;Nematoda;Chromadorea;Rhabditida;Strongylida;Trichostrongyloidea;Haemonchidae;Haemonchinae;Haemonchus;Haemonchus contortus;
-0.41	394	Minc05962	-	6e-10	-	-	-	-	-	4e-10	341890895	24.63	C_bre	Caenorhabditis brenneri	@Eukaryota@Metazoa	135651	;cellular organisms;Eukaryota;Opisthokonta;Metazoa;Eumetazoa;Bilateria;Protostomia;Ecdysozoa;Nematoda;Chromadorea;Rhabditida;Rhabditoidea;Rhabditidae;Peloderinae;Caenorhabditis;Caenorhabditis brenneri;
-0.41	31	Minc17045	-	6e-06	-	-	-	-	-	4e-06	568916124	45.24	M_mus	Mus musculus	@Eukaryota@Metazoa	10090	;cellular organisms;Eukaryota;Opisthokonta;Metazoa;Eumetazoa;Bilateria;Deuterostomia;Chordata;Craniata;Vertebrata;Gnathostomata;Teleostomi;Euteleostomi;Sarcopterygii;Dipnotetrapodomorpha;Tetrapoda;Amniota;Mammalia;Theria;Eutheria;Boreoeutheria;Euarchontoglires;Glires;Rodentia;Myomorpha;Muroidea;Muridae;Murinae;Mus;Mus;Mus musculus;
-0.41	250	Minc02063	-	-	9e-32	-	-	9e-32	-	6e-32	555687614	28.16	H_rob	Helobdella robusta	@Eukaryota@Metazoa	6412	;cellular organisms;Eukaryota;Opisthokonta;Metazoa;Eumetazoa;Bilateria;Protostomia;Lophotrochozoa;Annelida;Clitellata;Hirudinea;Rhynchobdellida;Glossiphoniidae;Helobdella;Helobdella robusta;
-0.41	92	Minc18003	-	-	6e-07	-	-	6e-07	-	4e-07	597834696	42.35	A_cey	Ancylostoma ceylanicum	@Eukaryota@Metazoa	53326	;cellular organisms;Eukaryota;Opisthokonta;Metazoa;Eumetazoa;Bilateria;Protostomia;Ecdysozoa;Nematoda;Chromadorea;Rhabditida;Strongylida;Ancylostomatoidea;Ancylostomatidae;Ancylostomatinae;Ancylostoma;Ancylostoma ceylanicum;
-0.41	54	Minc12305	-	3e-06	-	-	-	-	-	2e-06	195997827	24.19	T_adh	Trichoplax adhaerens	@Eukaryota@Metazoa	10228	;cellular organisms;Eukaryota;Opisthokonta;Metazoa;Placozoa;Trichoplax;Trichoplax adhaerens;
-0.41	250	Minc07040	-	-	6e-58	-	-	6e-58	-	4e-58	402585803	52.94	W_ban	Wuchereria bancrofti	@Eukaryota@Metazoa	6293	;cellular organisms;Eukaryota;Opisthokonta;Metazoa;Eumetazoa;Bilateria;Protostomia;Ecdysozoa;Nematoda;Chromadorea;Spirurida;Filarioidea;Onchocercidae;Wuchereria;Wuchereria bancrofti;
-0.47	250	Minc15938	-	-	8e-26	-	-	-	-	5e-26	584031181	42.96	N_bri	Neolamprologus brichardi	@Eukaryota@Metazoa	32507	;cellular organisms;Eukaryota;Opisthokonta;Metazoa;Eumetazoa;Bilateria;Deuterostomia;Chordata;Craniata;Vertebrata;Gnathostomata;Teleostomi;Euteleostomi;Actinopterygii;Actinopteri;Neopterygii;Teleostei;Osteoglossocephalai;Clupeocephala;Euteleosteomorpha;Neoteleostei;Eurypterygia;Ctenosquamata;Acanthomorphata;Euacanthomorphacea;Percomorphaceae;Ovalentaria;Cichlomorphae;Cichliformes;Cichlidae;Africa…
-0.47	250	Minc07094	-	-	-	-	8e-94	-	-	5e-94	560188956	80.12	H_sap	Homo sapiens	@Eukaryota@Metazoa	9606	;cellular organisms;Eukaryota;Opisthokonta;Metazoa;Eumetazoa;Bilateria;Deuterostomia;Chordata;Craniata;Vertebrata;Gnathostomata;Teleostomi;Euteleostomi;Sarcopterygii;Dipnotetrapodomorpha;Tetrapoda;Amniota;Mammalia;Theria;Eutheria;Boreoeutheria;Euarchontoglires;Primates;Haplorrhini;Simiiformes;Catarrhini;Hominoidea;Hominidae;Homininae;Homo;Homo sapiens;
-0.51	250	Minc09184	-	-	1e-28	-	-	-	-	6e-29	524882540	26.69	A_cal	Aplysia californica	@Eukaryota@Metazoa	6500	;cellular organisms;Eukaryota;Opisthokonta;Metazoa;Eumetazoa;Bilateria;Protostomia;Lophotrochozoa;Mollusca;Gastropoda;Heterobranchia;Euthyneura;Euopisthobranchia;Aplysiomorpha;Aplysioidea;Aplysiidae;Aplysia;Aplysia californica;
-0.51	252	Minc15392	-	-	5e-08	-	-	5e-08	-	3e-08	268569436	37.97	C_bri	Caenorhabditis briggsae	@Eukaryota@Metazoa	6238	;cellular organisms;Eukaryota;Opisthokonta;Metazoa;Eumetazoa;Bilateria;Protostomia;Ecdysozoa;Nematoda;Chromadorea;Rhabditida;Rhabditoidea;Rhabditidae;Peloderinae;Caenorhabditis;Caenorhabditis briggsae;
-0.51	419	Minc10403	-	-	5e-29	-	-	-	-	3e-29	597876402	69.14	A_cey	Ancylostoma ceylanicum	@Eukaryota@Metazoa	53326	;cellular organisms;Eukaryota;Opisthokonta;Metazoa;Eumetazoa;Bilateria;Protostomia;Ecdysozoa;Nematoda;Chromadorea;Rhabditida;Strongylida;Ancylostomatoidea;Ancylostomatidae;Ancylostomatinae;Ancylostoma;Ancylostoma ceylanicum;
-0.51	250	Minc16701	-	-	5e-19	-	-	5e-19	-	3e-19	391333150	42.37	G_occ	Galendromus occidentalis	@Eukaryota@Metazoa	34638	;cellular organisms;Eukaryota;Opisthokonta;Metazoa;Eumetazoa;Bilateria;Protostomia;Ecdysozoa;Panarthropoda;Arthropoda;Chelicerata;Arachnida;Acari;Parasitiformes;Mesostigmata;Monogynaspida;Gamasina;Phytoseioidea;Phytoseiidae;Typhlodrominae;Galendromus;Galendromus occidentalis;
-0.51	251	Minc03359	-	-	5e-08	-	-	5e-08	-	3e-08	465959437	100	C_myd	Chelonia mydas	@Eukaryota@Metazoa	8469	;cellular organisms;Eukaryota;Opisthokonta;Metazoa;Eumetazoa;Bilateria;Deuterostomia;Chordata;Craniata;Vertebrata;Gnathostomata;Teleostomi;Euteleostomi;Sarcopterygii;Dipnotetrapodomorpha;Tetrapoda;Amniota;Sauropsida;Sauria;Archelosauria;Testudines;Cryptodira;Durocryptodira;Americhelydia;Chelonioidea;Cheloniidae;Chelonia;Chelonia mydas;
-0.56	250	Minc18782	-	-	7e-90	-	-	7e-90	-	4e-90	402585803	55.25	W_ban	Wuchereria bancrofti	@Eukaryota@Metazoa	6293	;cellular organisms;Eukaryota;Opisthokonta;Metazoa;Eumetazoa;Bilateria;Protostomia;Ecdysozoa;Nematoda;Chromadorea;Spirurida;Filarioidea;Onchocercidae;Wuchereria;Wuchereria bancrofti;
-0.56	250	Minc04977	-	-	7e-11	-	-	7e-11	-	4e-11	341892712	27.82	C_bre	Caenorhabditis brenneri	@Eukaryota@Metazoa	135651	;cellular organisms;Eukaryota;Opisthokonta;Metazoa;Eumetazoa;Bilateria;Protostomia;Ecdysozoa;Nematoda;Chromadorea;Rhabditida;Rhabditoidea;Rhabditidae;Peloderinae;Caenorhabditis;Caenorhabditis brenneri;
-0.69	250	Minc13955	-	-	4e-57	-	-	4e-57	-	2e-57	170053486	98.89	C_qui	Culex quinquefasciatus	@Eukaryota@Metazoa	7176	;cellular organisms;Eukaryota;Opisthokonta;Metazoa;Eumetazoa;Bilateria;Protostomia;Ecdysozoa;Panarthropoda;Arthropoda;Mandibulata;Pancrustacea;Hexapoda;Insecta;Dicondylia;Pterygota;Neoptera;Holometabola;Diptera;Nematocera;Culicomorpha;Culicoidea;Culicidae;Culicinae;Culicini;Culex;Culex;Culex pipiens complex;Culex quinquefasciatus;
-0.69	250	Minc02368	-	-	4e-57	-	-	4e-57	-	2e-57	170053486	98.89	C_qui	Culex quinquefasciatus	@Eukaryota@Metazoa	7176	;cellular organisms;Eukaryota;Opisthokonta;Metazoa;Eumetazoa;Bilateria;Protostomia;Ecdysozoa;Panarthropoda;Arthropoda;Mandibulata;Pancrustacea;Hexapoda;Insecta;Dicondylia;Pterygota;Neoptera;Holometabola;Diptera;Nematocera;Culicomorpha;Culicoidea;Culicidae;Culicinae;Culicini;Culex;Culex;Culex pipiens complex;Culex quinquefasciatus;
-0.69	250	Minc10544	-	-	2e-33	-	-	-	-	1e-33	560138170	55	H_con	Haemonchus contortus	@Eukaryota@Metazoa	6289	;cellular organisms;Eukaryota;Opisthokonta;Metazoa;Eumetazoa;Bilateria;Protostomia;Ecdysozoa;Nematoda;Chromadorea;Rhabditida;Strongylida;Trichostrongyloidea;Haemonchidae;Haemonchinae;Haemonchus;Haemonchus contortus;
-0.69	251	Minc09970	-	-	-	-	1e-09	-	-	5e-10	193648060	27.42	A_pis	Acyrthosiphon pisum	@Eukaryota@Metazoa	7029	;cellular organisms;Eukaryota;Opisthokonta;Metazoa;Eumetazoa;Bilateria;Protostomia;Ecdysozoa;Panarthropoda;Arthropoda;Mandibulata;Pancrustacea;Hexapoda;Insecta;Dicondylia;Pterygota;Neoptera;Paraneoptera;Hemiptera;Sternorrhyncha;Aphidomorpha;Aphidoidea;Aphididae;Aphidinae;Macrosiphini;Acyrthosiphon;Acyrthosiphon pisum;
-0.69	81	Minc07712	-	-	4e-06	-	-	-	4e-06	2e-06	195447728	36.71	D_wil	Drosophila willistoni	@Eukaryota@Metazoa	7260	;cellular organisms;Eukaryota;Opisthokonta;Metazoa;Eumetazoa;Bilateria;Protostomia;Ecdysozoa;Panarthropoda;Arthropoda;Mandibulata;Pancrustacea;Hexapoda;Insecta;Dicondylia;Pterygota;Neoptera;Holometabola;Diptera;Brachycera;Muscomorpha;Eremoneura;Cyclorrhapha;Schizophora;Acalyptratae;Ephydroidea;Drosophilidae;Drosophilinae;Drosophilini;Drosophila;Sophophora;willistoni group;willistoni subgroup;Dros…
-0.69	72	Minc12040	-	-	1e-06	-	-	-	1e-06	5e-07	198433066	26.34	C_int	Ciona intestinalis	@Eukaryota@Metazoa	7719	;cellular organisms;Eukaryota;Opisthokonta;Metazoa;Eumetazoa;Bilateria;Deuterostomia;Chordata;Tunicata;Ascidiacea;Enterogona;Phlebobranchia;Cionidae;Ciona;Ciona intestinalis;
-0.69	250	Minc13771	-	-	2e-33	-	-	-	-	1e-33	560138170	55	H_con	Haemonchus contortus	@Eukaryota@Metazoa	6289	;cellular organisms;Eukaryota;Opisthokonta;Metazoa;Eumetazoa;Bilateria;Protostomia;Ecdysozoa;Nematoda;Chromadorea;Rhabditida;Strongylida;Trichostrongyloidea;Haemonchidae;Haemonchinae;Haemonchus;Haemonchus contortus;
-0.69	255	Minc05315	-	-	-	-	1e-11	-	-	5e-12	363896066	39.62	H_arm	Helicoverpa armigera	@Eukaryota@Metazoa	29058	;cellular organisms;Eukaryota;Opisthokonta;Metazoa;Eumetazoa;Bilateria;Protostomia;Ecdysozoa;Panarthropoda;Arthropoda;Mandibulata;Pancrustacea;Hexapoda;Insecta;Dicondylia;Pterygota;Neoptera;Holometabola;Amphiesmenoptera;Lepidoptera;Glossata;Neolepidoptera;Heteroneura;Ditrysia;Obtectomera;Noctuoidea;Noctuidae;Heliothinae;Helicoverpa;Helicoverpa armigera;
-0.69	250	Minc04077	-	-	2e-09	-	-	2e-09	-	1e-09	70909537	74.29	Sphae	Sphaerius sp. APV-2005	@Eukaryota@Metazoa	292460	;cellular organisms;Eukaryota;Opisthokonta;Metazoa;Eumetazoa;Bilateria;Protostomia;Ecdysozoa;Panarthropoda;Arthropoda;Mandibulata;Pancrustacea;Hexapoda;Insecta;Dicondylia;Pterygota;Neoptera;Holometabola;Coleoptera;Myxophaga;Sphaeriusidae;Sphaerius;Sphaerius sp. APV-2005;
-0.69	189	Minc17230	-	-	4e-13	-	-	-	4e-13	2e-13	341881930	44	C_bre	Caenorhabditis brenneri	@Eukaryota@Metazoa	135651	;cellular organisms;Eukaryota;Opisthokonta;Metazoa;Eumetazoa;Bilateria;Protostomia;Ecdysozoa;Nematoda;Chromadorea;Rhabditida;Rhabditoidea;Rhabditidae;Peloderinae;Caenorhabditis;Caenorhabditis brenneri;
-0.69	250	Minc12026	-	-	1e-22	-	-	1e-22	-	5e-23	507679872	26.23	E_tel	Echinops telfairi	@Eukaryota@Metazoa	9371	;cellular organisms;Eukaryota;Opisthokonta;Metazoa;Eumetazoa;Bilateria;Deuterostomia;Chordata;Craniata;Vertebrata;Gnathostomata;Teleostomi;Euteleostomi;Sarcopterygii;Dipnotetrapodomorpha;Tetrapoda;Amniota;Mammalia;Theria;Eutheria;Afrotheria;Tenrecidae;Tenrecinae;Echinops;Echinops telfairi;
-0.69	394	Minc11193	-	-	4e-50	-	-	4e-50	-	2e-50	597897292	35.53	A_cey	Ancylostoma ceylanicum	@Eukaryota@Metazoa	53326	;cellular organisms;Eukaryota;Opisthokonta;Metazoa;Eumetazoa;Bilateria;Protostomia;Ecdysozoa;Nematoda;Chromadorea;Rhabditida;Strongylida;Ancylostomatoidea;Ancylostomatidae;Ancylostomatinae;Ancylostoma;Ancylostoma ceylanicum;
-0.69	31	Minc14578	-	-	-	-	0.0001	-	-	5e-05	554884485	37.04	H_bur	Haplochromis burtoni	@Eukaryota@Metazoa	8153	;cellular organisms;Eukaryota;Opisthokonta;Metazoa;Eumetazoa;Bilateria;Deuterostomia;Chordata;Craniata;Vertebrata;Gnathostomata;Teleostomi;Euteleostomi;Actinopterygii;Actinopteri;Neopterygii;Teleostei;Osteoglossocephalai;Clupeocephala;Euteleosteomorpha;Neoteleostei;Eurypterygia;Ctenosquamata;Acanthomorphata;Euacanthomorphacea;Percomorphaceae;Ovalentaria;Cichlomorphae;Cichliformes;Cichlidae;Africa…
-0.69	35	Minc11975	-	-	2e-05	-	-	-	-	1e-05	432108775	37.5	M_dav	Myotis davidii	@Eukaryota@Metazoa	225400	;cellular organisms;Eukaryota;Opisthokonta;Metazoa;Eumetazoa;Bilateria;Deuterostomia;Chordata;Craniata;Vertebrata;Gnathostomata;Teleostomi;Euteleostomi;Sarcopterygii;Dipnotetrapodomorpha;Tetrapoda;Amniota;Mammalia;Theria;Eutheria;Boreoeutheria;Laurasiatheria;Chiroptera;Microchiroptera;Vespertilionidae;Myotis;Myotis davidii;
-0.69	250	Minc04343	-	-	4e-57	-	-	4e-57	-	2e-57	170053486	98.89	C_qui	Culex quinquefasciatus	@Eukaryota@Metazoa	7176	;cellular organisms;Eukaryota;Opisthokonta;Metazoa;Eumetazoa;Bilateria;Protostomia;Ecdysozoa;Panarthropoda;Arthropoda;Mandibulata;Pancrustacea;Hexapoda;Insecta;Dicondylia;Pterygota;Neoptera;Holometabola;Diptera;Nematocera;Culicomorpha;Culicoidea;Culicidae;Culicinae;Culicini;Culex;Culex;Culex pipiens complex;Culex quinquefasciatus;
-0.69	250	Minc13067	-	-	4e-57	-	-	4e-57	-	2e-57	170053486	98.89	C_qui	Culex quinquefasciatus	@Eukaryota@Metazoa	7176	;cellular organisms;Eukaryota;Opisthokonta;Metazoa;Eumetazoa;Bilateria;Protostomia;Ecdysozoa;Panarthropoda;Arthropoda;Mandibulata;Pancrustacea;Hexapoda;Insecta;Dicondylia;Pterygota;Neoptera;Holometabola;Diptera;Nematocera;Culicomorpha;Culicoidea;Culicidae;Culicinae;Culicini;Culex;Culex;Culex pipiens complex;Culex quinquefasciatus;
-0.69	88	Minc06798	-	-	2e-17	-	-	-	2e-17	1e-17	597892946	30.29	A_cey	Ancylostoma ceylanicum	@Eukaryota@Metazoa	53326	;cellular organisms;Eukaryota;Opisthokonta;Metazoa;Eumetazoa;Bilateria;Protostomia;Ecdysozoa;Nematoda;Chromadorea;Rhabditida;Strongylida;Ancylostomatoidea;Ancylostomatidae;Ancylostomatinae;Ancylostoma;Ancylostoma ceylanicum;
-0.69	250	Minc17542	-	-	4e-57	-	-	4e-57	-	2e-57	170053486	98.89	C_qui	Culex quinquefasciatus	@Eukaryota@Metazoa	7176	;cellular organisms;Eukaryota;Opisthokonta;Metazoa;Eumetazoa;Bilateria;Protostomia;Ecdysozoa;Panarthropoda;Arthropoda;Mandibulata;Pancrustacea;Hexapoda;Insecta;Dicondylia;Pterygota;Neoptera;Holometabola;Diptera;Nematocera;Culicomorpha;Culicoidea;Culicidae;Culicinae;Culicini;Culex;Culex;Culex pipiens complex;Culex quinquefasciatus;
-0.69	250	Minc07826c	-	-	2e-58	-	-	-	-	1e-58	507681888	54.04	E_tel	Echinops telfairi	@Eukaryota@Metazoa	9371	;cellular organisms;Eukaryota;Opisthokonta;Metazoa;Eumetazoa;Bilateria;Deuterostomia;Chordata;Craniata;Vertebrata;Gnathostomata;Teleostomi;Euteleostomi;Sarcopterygii;Dipnotetrapodomorpha;Tetrapoda;Amniota;Mammalia;Theria;Eutheria;Afrotheria;Tenrecidae;Tenrecinae;Echinops;Echinops telfairi;
-0.69	250	Minc07046	-	-	8e-11	-	-	-	8e-11	4e-11	313224233	34.65	O_dio	Oikopleura dioica	@Eukaryota@Metazoa	34765	;cellular organisms;Eukaryota;Opisthokonta;Metazoa;Eumetazoa;Bilateria;Deuterostomia;Chordata;Tunicata;Appendicularia;Oikopleuridae;Oikopleura;Oikopleura dioica;
-0.8	250	Minc16711	-	2e-15	-	-	-	-	-	9e-16	393908782	60.32	L_loa	Loa loa	@Eukaryota@Metazoa	7209	;cellular organisms;Eukaryota;Opisthokonta;Metazoa;Eumetazoa;Bilateria;Protostomia;Ecdysozoa;Nematoda;Chromadorea;Spirurida;Filarioidea;Onchocercidae;Loa;Loa loa;
-0.8	52	Minc10510	-	-	2e-06	-	-	-	-	9e-07	568916124	44.19	M_mus	Mus musculus	@Eukaryota@Metazoa	10090	;cellular organisms;Eukaryota;Opisthokonta;Metazoa;Eumetazoa;Bilateria;Deuterostomia;Chordata;Craniata;Vertebrata;Gnathostomata;Teleostomi;Euteleostomi;Sarcopterygii;Dipnotetrapodomorpha;Tetrapoda;Amniota;Mammalia;Theria;Eutheria;Boreoeutheria;Euarchontoglires;Glires;Rodentia;Myomorpha;Muroidea;Muridae;Murinae;Mus;Mus;Mus musculus;
-0.8	250	Minc16110	-	-	2e-14	-	-	2e-14	-	9e-15	170590534	28.76	B_mal	Brugia malayi	@Eukaryota@Metazoa	6279	;cellular organisms;Eukaryota;Opisthokonta;Metazoa;Eumetazoa;Bilateria;Protostomia;Ecdysozoa;Nematoda;Chromadorea;Spirurida;Filarioidea;Onchocercidae;Brugia;Brugia malayi;
-0.8	250	Minc01956	-	-	2e-19	-	-	-	2e-19	9e-20	541043280	71.67	A_suu	Ascaris suum	@Eukaryota@Metazoa	6253	;cellular organisms;Eukaryota;Opisthokonta;Metazoa;Eumetazoa;Bilateria;Protostomia;Ecdysozoa;Nematoda;Chromadorea;Ascaridida;Ascaridoidea;Ascarididae;Ascaris;Ascaris suum;
-0.8	458	Minc01265b	-	-	2e-26	-	-	-	-	9e-27	568291599	50.43	N_ame	Necator americanus	@Eukaryota@Metazoa	51031	;cellular organisms;Eukaryota;Opisthokonta;Metazoa;Eumetazoa;Bilateria;Protostomia;Ecdysozoa;Nematoda;Chromadorea;Rhabditida;Strongylida;Ancylostomatoidea;Ancylostomatidae;Bunostominae;Necator;Necator americanus;
-0.81	250	Minc05076	-	-	9e-08	-	-	-	9e-08	4e-08	554581799	52.08	M_bra	Myotis brandtii	@Eukaryota@Metazoa	109478	;cellular organisms;Eukaryota;Opisthokonta;Metazoa;Eumetazoa;Bilateria;Deuterostomia;Chordata;Craniata;Vertebrata;Gnathostomata;Teleostomi;Euteleostomi;Sarcopterygii;Dipnotetrapodomorpha;Tetrapoda;Amniota;Mammalia;Theria;Eutheria;Boreoeutheria;Laurasiatheria;Chiroptera;Microchiroptera;Vespertilionidae;Myotis;Myotis brandtii;
-0.85	12	Minc17871	-	-	7e-07	-	-	-	-	3e-07	443732846	52.53	C_tel	Capitella teleta	@Eukaryota@Metazoa	283909	;cellular organisms;Eukaryota;Opisthokonta;Metazoa;Eumetazoa;Bilateria;Protostomia;Lophotrochozoa;Annelida;Polychaeta;Scolecida;Capitellida;Capitellidae;Capitella;Capitella teleta;
-0.85	250	Minc15391	-	-	7e-09	-	-	-	-	3e-09	268569436	40.51	C_bri	Caenorhabditis briggsae	@Eukaryota@Metazoa	6238	;cellular organisms;Eukaryota;Opisthokonta;Metazoa;Eumetazoa;Bilateria;Protostomia;Ecdysozoa;Nematoda;Chromadorea;Rhabditida;Rhabditoidea;Rhabditidae;Peloderinae;Caenorhabditis;Caenorhabditis briggsae;
-0.92	250	Minc08151	-	-	5e-10	-	-	-	5e-10	2e-10	632979472	34.29	C_mil	Callorhinchus milii	@Eukaryota@Metazoa	7868	;cellular organisms;Eukaryota;Opisthokonta;Metazoa;Eumetazoa;Bilateria;Deuterostomia;Chordata;Craniata;Vertebrata;Gnathostomata;Chondrichthyes;Holocephali;Chimaeriformes;Callorhinchidae;Callorhinchus;Callorhinchus milii;
-0.92	250	Minc03942	-	-	5e-16	-	-	-	-	2e-16	341882138	45.45	C_bre	Caenorhabditis brenneri	@Eukaryota@Metazoa	135651	;cellular organisms;Eukaryota;Opisthokonta;Metazoa;Eumetazoa;Bilateria;Protostomia;Ecdysozoa;Nematoda;Chromadorea;Rhabditida;Rhabditoidea;Rhabditidae;Peloderinae;Caenorhabditis;Caenorhabditis brenneri;
-0.92	17	Minc08105	-	-	0.0002	-	-	-	-	8e-05	443706841	47.92	C_tel	Capitella teleta	@Eukaryota@Metazoa	283909	;cellular organisms;Eukaryota;Opisthokonta;Metazoa;Eumetazoa;Bilateria;Protostomia;Lophotrochozoa;Annelida;Polychaeta;Scolecida;Capitellida;Capitellidae;Capitella;Capitella teleta;
-0.92	21	Minc14927	-	-	1e-05	-	-	-	-	4e-06	170584312	51.11	B_mal	Brugia malayi	@Eukaryota@Metazoa	6279	;cellular organisms;Eukaryota;Opisthokonta;Metazoa;Eumetazoa;Bilateria;Protostomia;Ecdysozoa;Nematoda;Chromadorea;Spirurida;Filarioidea;Onchocercidae;Brugia;Brugia malayi;
-0.92	250	Minc16188	-	-	2e-30	-	-	-	2e-30	8e-31	555687614	29.65	H_rob	Helobdella robusta	@Eukaryota@Metazoa	6412	;cellular organisms;Eukaryota;Opisthokonta;Metazoa;Eumetazoa;Bilateria;Protostomia;Lophotrochozoa;Annelida;Clitellata;Hirudinea;Rhynchobdellida;Glossiphoniidae;Helobdella;Helobdella robusta;
-0.92	250	Minc15167	-	1e-07	-	-	-	-	-	4e-08	158285438	43.04	Anoph	Anopheles gambiae str. PEST	@Eukaryota@Metazoa	180454	;cellular organisms;Eukaryota;Opisthokonta;Metazoa;Eumetazoa;Bilateria;Protostomia;Ecdysozoa;Panarthropoda;Arthropoda;Mandibulata;Pancrustacea;Hexapoda;Insecta;Dicondylia;Pterygota;Neoptera;Holometabola;Diptera;Nematocera;Culicomorpha;Culicoidea;Culicidae;Anophelinae;Anopheles;Cellia;Pyretophorus;gambiae species complex;Anopheles gambiae;Anopheles gambiae str. PEST;
-0.92	251	Minc14821	-	2e-27	-	-	-	-	-	8e-28	597879050	35.23	A_cey	Ancylostoma ceylanicum	@Eukaryota@Metazoa	53326	;cellular organisms;Eukaryota;Opisthokonta;Metazoa;Eumetazoa;Bilateria;Protostomia;Ecdysozoa;Nematoda;Chromadorea;Rhabditida;Strongylida;Ancylostomatoidea;Ancylostomatidae;Ancylostomatinae;Ancylostoma;Ancylostoma ceylanicum;
-0.92	250	Minc14110	-	-	5e-16	-	-	5e-16	-	2e-16	157109674	24.69	A_aeg	Aedes aegypti	@Eukaryota@Metazoa	7159	;cellular organisms;Eukaryota;Opisthokonta;Metazoa;Eumetazoa;Bilateria;Protostomia;Ecdysozoa;Panarthropoda;Arthropoda;Mandibulata;Pancrustacea;Hexapoda;Insecta;Dicondylia;Pterygota;Neoptera;Holometabola;Diptera;Nematocera;Culicomorpha;Culicoidea;Culicidae;Culicinae;Aedini;Aedes;Stegomyia;Aedes aegypti;
-0.92	61	Minc01538	-	-	5e-05	-	-	5e-05	-	2e-05	195167835	38.46	D_per	Drosophila persimilis	@Eukaryota@Metazoa	7234	;cellular organisms;Eukaryota;Opisthokonta;Metazoa;Eumetazoa;Bilateria;Protostomia;Ecdysozoa;Panarthropoda;Arthropoda;Mandibulata;Pancrustacea;Hexapoda;Insecta;Dicondylia;Pterygota;Neoptera;Holometabola;Diptera;Brachycera;Muscomorpha;Eremoneura;Cyclorrhapha;Schizophora;Acalyptratae;Ephydroidea;Drosophilidae;Drosophilinae;Drosophilini;Drosophila;Sophophora;obscura group;pseudoobscura subgroup;Dros…
-0.92	246	Minc09036	-	5e-26	-	-	-	-	-	2e-26	391341891	47.11	G_occ	Galendromus occidentalis	@Eukaryota@Metazoa	34638	;cellular organisms;Eukaryota;Opisthokonta;Metazoa;Eumetazoa;Bilateria;Protostomia;Ecdysozoa;Panarthropoda;Arthropoda;Chelicerata;Arachnida;Acari;Parasitiformes;Mesostigmata;Monogynaspida;Gamasina;Phytoseioidea;Phytoseiidae;Typhlodrominae;Galendromus;Galendromus occidentalis;
-0.92	250	Minc08307	-	-	1e-62	-	-	-	1e-62	4e-63	556110968	63.89	L_gig	Lottia gigantea	@Eukaryota@Metazoa	225164	;cellular organisms;Eukaryota;Opisthokonta;Metazoa;Eumetazoa;Bilateria;Protostomia;Lophotrochozoa;Mollusca;Gastropoda;Patellogastropoda;Lottioidea;Lottiidae;Lottia;Lottia gigantea;
-0.92	250	Minc07834	-	-	1e-07	-	-	-	-	4e-08	170581440	47.54	B_mal	Brugia malayi	@Eukaryota@Metazoa	6279	;cellular organisms;Eukaryota;Opisthokonta;Metazoa;Eumetazoa;Bilateria;Protostomia;Ecdysozoa;Nematoda;Chromadorea;Spirurida;Filarioidea;Onchocercidae;Brugia;Brugia malayi;
-0.98	43	Minc17814	-	-	8e-06	-	-	-	8e-06	3e-06	24647320	36.47	D_mel	Drosophila melanogaster	@Eukaryota@Metazoa	7227	;cellular organisms;Eukaryota;Opisthokonta;Metazoa;Eumetazoa;Bilateria;Protostomia;Ecdysozoa;Panarthropoda;Arthropoda;Mandibulata;Pancrustacea;Hexapoda;Insecta;Dicondylia;Pterygota;Neoptera;Holometabola;Diptera;Brachycera;Muscomorpha;Eremoneura;Cyclorrhapha;Schizophora;Acalyptratae;Ephydroidea;Drosophilidae;Drosophilinae;Drosophilini;Drosophila;Sophophora;melanogaster group;melanogaster subgroup;…
-0.98	253	Minc06859	-	-	8e-14	-	-	8e-14	-	3e-14	339241013	32.95	T_spi	Trichinella spiralis	@Eukaryota@Metazoa	6334	;cellular organisms;Eukaryota;Opisthokonta;Metazoa;Eumetazoa;Bilateria;Protostomia;Ecdysozoa;Nematoda;Enoplea;Dorylaimia;Trichocephalida;Trichinellidae;Trichinella;Trichinella spiralis;
-1.05	250	Minc08432	-	-	2e-07	-	-	-	2e-07	7e-08	597880519	31.78	A_cey	Ancylostoma ceylanicum	@Eukaryota@Metazoa	53326	;cellular organisms;Eukaryota;Opisthokonta;Metazoa;Eumetazoa;Bilateria;Protostomia;Ecdysozoa;Nematoda;Chromadorea;Rhabditida;Strongylida;Ancylostomatoidea;Ancylostomatidae;Ancylostomatinae;Ancylostoma;Ancylostoma ceylanicum;
-1.05	250	Minc05712	-	-	2e-10	-	-	-	-	7e-11	568297513	60.42	N_ame	Necator americanus	@Eukaryota@Metazoa	51031	;cellular organisms;Eukaryota;Opisthokonta;Metazoa;Eumetazoa;Bilateria;Protostomia;Ecdysozoa;Nematoda;Chromadorea;Rhabditida;Strongylida;Ancylostomatoidea;Ancylostomatidae;Bunostominae;Necator;Necator americanus;
-1.1	14	Minc16460	-	-	9e-05	-	-	-	-	3e-05	432859517	24.19	O_lat	Oryzias latipes	@Eukaryota@Metazoa	8090	;cellular organisms;Eukaryota;Opisthokonta;Metazoa;Eumetazoa;Bilateria;Deuterostomia;Chordata;Craniata;Vertebrata;Gnathostomata;Teleostomi;Euteleostomi;Actinopterygii;Actinopteri;Neopterygii;Teleostei;Osteoglossocephalai;Clupeocephala;Euteleosteomorpha;Neoteleostei;Eurypterygia;Ctenosquamata;Acanthomorphata;Euacanthomorphacea;Percomorphaceae;Ovalentaria;Atherinomorphae;Beloniformes;Adrianichthyoi…
-1.1	250	Minc17699	-	-	3e-20	-	-	-	-	1e-20	483484078	37.04	A_pla	Anas platyrhynchos	@Eukaryota@Metazoa	8839	;cellular organisms;Eukaryota;Opisthokonta;Metazoa;Eumetazoa;Bilateria;Deuterostomia;Chordata;Craniata;Vertebrata;Gnathostomata;Teleostomi;Euteleostomi;Sarcopterygii;Dipnotetrapodomorpha;Tetrapoda;Amniota;Sauropsida;Sauria;Archelosauria;Archosauria;Dinosauria;Saurischia;Theropoda;Coelurosauria;Aves;Neognathae;Galloanserae;Anseriformes;Anatidae;Anas;Anas platyrhynchos;
-1.1	250	Minc01445	-	-	9e-05	-	-	9e-05	-	3e-05	260809506	75	B_flo	Branchiostoma floridae	@Eukaryota@Metazoa	7739	;cellular organisms;Eukaryota;Opisthokonta;Metazoa;Eumetazoa;Bilateria;Deuterostomia;Chordata;Cephalochordata;Branchiostomidae;Branchiostoma;Branchiostoma floridae;
-1.1	174	Minc03734	-	6e-06	-	-	-	-	-	2e-06	308447894	64.71	C_rem	Caenorhabditis remanei	@Eukaryota@Metazoa	31234	;cellular organisms;Eukaryota;Opisthokonta;Metazoa;Eumetazoa;Bilateria;Protostomia;Ecdysozoa;Nematoda;Chromadorea;Rhabditida;Rhabditoidea;Rhabditidae;Peloderinae;Caenorhabditis;Caenorhabditis remanei;
-1.1	250	Minc16363	-	-	3e-10	-	-	3e-10	-	1e-10	354480681	46.25	C_gri	Cricetulus griseus	@Eukaryota@Metazoa	10029	;cellular organisms;Eukaryota;Opisthokonta;Metazoa;Eumetazoa;Bilateria;Deuterostomia;Chordata;Craniata;Vertebrata;Gnathostomata;Teleostomi;Euteleostomi;Sarcopterygii;Dipnotetrapodomorpha;Tetrapoda;Amniota;Mammalia;Theria;Eutheria;Boreoeutheria;Euarchontoglires;Glires;Rodentia;Myomorpha;Muroidea;Cricetidae;Cricetinae;Cricetulus;Cricetulus griseus;
-1.1	5	Minc16799	-	-	3e-05	-	-	3e-05	-	1e-05	195995463	28.33	T_adh	Trichoplax adhaerens	@Eukaryota@Metazoa	10228	;cellular organisms;Eukaryota;Opisthokonta;Metazoa;Placozoa;Trichoplax;Trichoplax adhaerens;
-1.2	250	Minc11564	-	-	1e-14	-	-	1e-14	-	3e-15	196013281	50.59	T_adh	Trichoplax adhaerens	@Eukaryota@Metazoa	10228	;cellular organisms;Eukaryota;Opisthokonta;Metazoa;Placozoa;Trichoplax;Trichoplax adhaerens;
-1.2	250	Minc10684	-	-	2e-21	-	-	-	-	6e-22	560140709	25.77	H_con	Haemonchus contortus	@Eukaryota@Metazoa	6289	;cellular organisms;Eukaryota;Opisthokonta;Metazoa;Eumetazoa;Bilateria;Protostomia;Ecdysozoa;Nematoda;Chromadorea;Rhabditida;Strongylida;Trichostrongyloidea;Haemonchidae;Haemonchinae;Haemonchus;Haemonchus contortus;
-1.2	117	Minc11222	-	-	0.0001	-	-	-	-	3e-05	41152398	74.07	D_rer	Danio rerio	@Eukaryota@Metazoa	7955	;cellular organisms;Eukaryota;Opisthokonta;Metazoa;Eumetazoa;Bilateria;Deuterostomia;Chordata;Craniata;Vertebrata;Gnathostomata;Teleostomi;Euteleostomi;Actinopterygii;Actinopteri;Neopterygii;Teleostei;Osteoglossocephalai;Clupeocephala;Otomorpha;Ostariophysi;Otophysi;Cypriniphysae;Cypriniformes;Cyprinoidea;Cyprinidae;Danio;Danio rerio;
-1.2	198	Minc17697	-	-	1e-06	-	-	-	1e-06	3e-07	597834696	31.67	A_cey	Ancylostoma ceylanicum	@Eukaryota@Metazoa	53326	;cellular organisms;Eukaryota;Opisthokonta;Metazoa;Eumetazoa;Bilateria;Protostomia;Ecdysozoa;Nematoda;Chromadorea;Rhabditida;Strongylida;Ancylostomatoidea;Ancylostomatidae;Ancylostomatinae;Ancylostoma;Ancylostoma ceylanicum;
-1.2	4	Minc07280	-	-	0.001	-	-	-	0.001	0.0003	597842935	33.33	A_cey	Ancylostoma ceylanicum	@Eukaryota@Metazoa	53326	;cellular organisms;Eukaryota;Opisthokonta;Metazoa;Eumetazoa;Bilateria;Protostomia;Ecdysozoa;Nematoda;Chromadorea;Rhabditida;Strongylida;Ancylostomatoidea;Ancylostomatidae;Ancylostomatinae;Ancylostoma;Ancylostoma ceylanicum;
-1.2	250	Minc03493	-	1e-34	-	-	-	-	-	3e-35	195120984	58.72	D_moj	Drosophila mojavensis	@Eukaryota@Metazoa	7230	;cellular organisms;Eukaryota;Opisthokonta;Metazoa;Eumetazoa;Bilateria;Protostomia;Ecdysozoa;Panarthropoda;Arthropoda;Mandibulata;Pancrustacea;Hexapoda;Insecta;Dicondylia;Pterygota;Neoptera;Holometabola;Diptera;Brachycera;Muscomorpha;Eremoneura;Cyclorrhapha;Schizophora;Acalyptratae;Ephydroidea;Drosophilidae;Drosophilinae;Drosophilini;Drosophila;Drosophila;repleta group;mulleri subgroup;mojavensis…
-1.2	260	Minc05334	-	-	-	-	2e-18	-	-	6e-19	541042271	34.09	A_suu	Ascaris suum	@Eukaryota@Metazoa	6253	;cellular organisms;Eukaryota;Opisthokonta;Metazoa;Eumetazoa;Bilateria;Protostomia;Ecdysozoa;Nematoda;Chromadorea;Ascaridida;Ascaridoidea;Ascarididae;Ascaris;Ascaris suum;
-1.32	250	Minc16107	-	-	3e-11	-	-	-	3e-11	8e-12	597845909	45.83	A_cey	Ancylostoma ceylanicum	@Eukaryota@Metazoa	53326	;cellular organisms;Eukaryota;Opisthokonta;Metazoa;Eumetazoa;Bilateria;Protostomia;Ecdysozoa;Nematoda;Chromadorea;Rhabditida;Strongylida;Ancylostomatoidea;Ancylostomatidae;Ancylostomatinae;Ancylostoma;Ancylostoma ceylanicum;
-1.32	250	Minc06566	-	-	3e-19	-	-	-	3e-19	8e-20	91078888	45.45	T_cas	Tribolium castaneum	@Eukaryota@Metazoa	7070	;cellular organisms;Eukaryota;Opisthokonta;Metazoa;Eumetazoa;Bilateria;Protostomia;Ecdysozoa;Panarthropoda;Arthropoda;Mandibulata;Pancrustacea;Hexapoda;Insecta;Dicondylia;Pterygota;Neoptera;Holometabola;Coleoptera;Polyphaga;Cucujiformia;Tenebrionoidea;Tenebrionidae;Tenebrionidae incertae sedis;Tribolium;Tribolium castaneum;
-1.39	265	Minc09010	-	-	2e-11	-	-	-	-	5e-12	597856036	44.83	A_cey	Ancylostoma ceylanicum	@Eukaryota@Metazoa	53326	;cellular organisms;Eukaryota;Opisthokonta;Metazoa;Eumetazoa;Bilateria;Protostomia;Ecdysozoa;Nematoda;Chromadorea;Rhabditida;Strongylida;Ancylostomatoidea;Ancylostomatidae;Ancylostomatinae;Ancylostoma;Ancylostoma ceylanicum;
-1.39	250	Minc14392	-	-	4e-30	-	-	-	-	1e-30	46576851	72.29	A_suu	Ascaris suum	@Eukaryota@Metazoa	6253	;cellular organisms;Eukaryota;Opisthokonta;Metazoa;Eumetazoa;Bilateria;Protostomia;Ecdysozoa;Nematoda;Chromadorea;Ascaridida;Ascaridoidea;Ascarididae;Ascaris;Ascaris suum;
-1.39	10	Minc01334	-	-	2e-08	-	-	-	-	5e-09	308474973	28.89	C_rem	Caenorhabditis remanei	@Eukaryota@Metazoa	31234	;cellular organisms;Eukaryota;Opisthokonta;Metazoa;Eumetazoa;Bilateria;Protostomia;Ecdysozoa;Nematoda;Chromadorea;Rhabditida;Rhabditoidea;Rhabditidae;Peloderinae;Caenorhabditis;Caenorhabditis remanei;
-1.39	201	Minc07304	-	-	2e-07	-	-	-	-	5e-08	58332694	47.17	X_tro	Xenopus tropicalis	@Eukaryota@Metazoa	8364	;cellular organisms;Eukaryota;Opisthokonta;Metazoa;Eumetazoa;Bilateria;Deuterostomia;Chordata;Craniata;Vertebrata;Gnathostomata;Teleostomi;Euteleostomi;Sarcopterygii;Dipnotetrapodomorpha;Tetrapoda;Amphibia;Batrachia;Anura;Pipoidea;Pipidae;Xenopodinae;Xenopus;Silurana;Xenopus tropicalis;
-1.39	143	Minc10527	-	-	2e-06	-	-	-	2e-06	5e-07	560134932	26.9	H_con	Haemonchus contortus	@Eukaryota@Metazoa	6289	;cellular organisms;Eukaryota;Opisthokonta;Metazoa;Eumetazoa;Bilateria;Protostomia;Ecdysozoa;Nematoda;Chromadorea;Rhabditida;Strongylida;Trichostrongyloidea;Haemonchidae;Haemonchinae;Haemonchus;Haemonchus contortus;
-1.39	251	Minc05720	-	-	4e-10	-	-	-	-	1e-10	170574400	45.83	B_mal	Brugia malayi	@Eukaryota@Metazoa	6279	;cellular organisms;Eukaryota;Opisthokonta;Metazoa;Eumetazoa;Bilateria;Protostomia;Ecdysozoa;Nematoda;Chromadorea;Spirurida;Filarioidea;Onchocercidae;Brugia;Brugia malayi;
-1.39	250	Minc11032	-	-	2e-19	-	-	2e-19	-	5e-20	229366696	70.31	A_fim	Anoplopoma fimbria	@Eukaryota@Metazoa	229290	;cellular organisms;Eukaryota;Opisthokonta;Metazoa;Eumetazoa;Bilateria;Deuterostomia;Chordata;Craniata;Vertebrata;Gnathostomata;Teleostomi;Euteleostomi;Actinopterygii;Actinopteri;Neopterygii;Teleostei;Osteoglossocephalai;Clupeocephala;Euteleosteomorpha;Neoteleostei;Eurypterygia;Ctenosquamata;Acanthomorphata;Euacanthomorphacea;Percomorphaceae;Eupercaria;Perciformes;Cottioidei;Anoplopomatales;Anopl…
-1.39	250	Minc15556	-	-	2e-10	-	-	-	2e-10	5e-11	307201685	39.02	H_sal	Harpegnathos saltator	@Eukaryota@Metazoa	610380	;cellular organisms;Eukaryota;Opisthokonta;Metazoa;Eumetazoa;Bilateria;Protostomia;Ecdysozoa;Panarthropoda;Arthropoda;Mandibulata;Pancrustacea;Hexapoda;Insecta;Dicondylia;Pterygota;Neoptera;Holometabola;Hymenoptera;Apocrita;Aculeata;Vespoidea;Formicidae;Ponerinae;Ponerini;Harpegnathos;Harpegnathos saltator;
-1.39	250	Minc00834	-	-	2e-18	-	-	-	2e-18	5e-19	560125656	29.3	H_con	Haemonchus contortus	@Eukaryota@Metazoa	6289	;cellular organisms;Eukaryota;Opisthokonta;Metazoa;Eumetazoa;Bilateria;Protostomia;Ecdysozoa;Nematoda;Chromadorea;Rhabditida;Strongylida;Trichostrongyloidea;Haemonchidae;Haemonchinae;Haemonchus;Haemonchus contortus;
-1.46	250	Minc12670	-	-	3e-14	-	-	-	-	7e-15	556114265	32.92	L_gig	Lottia gigantea	@Eukaryota@Metazoa	225164	;cellular organisms;Eukaryota;Opisthokonta;Metazoa;Eumetazoa;Bilateria;Protostomia;Lophotrochozoa;Mollusca;Gastropoda;Patellogastropoda;Lottioidea;Lottiidae;Lottia;Lottia gigantea;
-1.46	250	Minc18616b	-	-	3e-78	-	-	-	3e-78	7e-79	646708589	45.16	Z_nev	Zootermopsis nevadensis	@Eukaryota@Metazoa	136037	;cellular organisms;Eukaryota;Opisthokonta;Metazoa;Eumetazoa;Bilateria;Protostomia;Ecdysozoa;Panarthropoda;Arthropoda;Mandibulata;Pancrustacea;Hexapoda;Insecta;Dicondylia;Pterygota;Neoptera;Polyneoptera;Dictyoptera;Blattodea;Blattoidea;Termitoidae;Termopsidae;Termopsinae;Termopsini;Zootermopsis;Zootermopsis nevadensis;
-1.49	117	Minc04269	-	-	4e-06	-	-	-	-	9e-07	556945463	34.82	L_cha	Latimeria chalumnae	@Eukaryota@Metazoa	7897	;cellular organisms;Eukaryota;Opisthokonta;Metazoa;Eumetazoa;Bilateria;Deuterostomia;Chordata;Craniata;Vertebrata;Gnathostomata;Teleostomi;Euteleostomi;Sarcopterygii;Coelacanthimorpha;Coelacanthiformes;Coelacanthidae;Latimeria;Latimeria chalumnae;
-1.49	251	Minc04050	-	-	4e-10	-	-	-	-	9e-11	170574400	45.83	B_mal	Brugia malayi	@Eukaryota@Metazoa	6279	;cellular organisms;Eukaryota;Opisthokonta;Metazoa;Eumetazoa;Bilateria;Protostomia;Ecdysozoa;Nematoda;Chromadorea;Spirurida;Filarioidea;Onchocercidae;Brugia;Brugia malayi;
-1.5	250	Minc11989b	-	-	9e-78	-	-	-	9e-78	2e-78	555687067	43.95	H_rob	Helobdella robusta	@Eukaryota@Metazoa	6412	;cellular organisms;Eukaryota;Opisthokonta;Metazoa;Eumetazoa;Bilateria;Protostomia;Lophotrochozoa;Annelida;Clitellata;Hirudinea;Rhynchobdellida;Glossiphoniidae;Helobdella;Helobdella robusta;
-1.5	257	Minc10578	-	-	-	-	9e-13	-	-	2e-13	443715102	39.6	C_tel	Capitella teleta	@Eukaryota@Metazoa	283909	;cellular organisms;Eukaryota;Opisthokonta;Metazoa;Eumetazoa;Bilateria;Protostomia;Lophotrochozoa;Annelida;Polychaeta;Scolecida;Capitellida;Capitellidae;Capitella;Capitella teleta;
-1.61	31	Minc00847b	-	-	2e-05	-	-	-	-	4e-06	170587758	35.64	B_mal	Brugia malayi	@Eukaryota@Metazoa	6279	;cellular organisms;Eukaryota;Opisthokonta;Metazoa;Eumetazoa;Bilateria;Protostomia;Ecdysozoa;Nematoda;Chromadorea;Spirurida;Filarioidea;Onchocercidae;Brugia;Brugia malayi;
-1.61	309	Minc17468	-	-	1e-38	-	-	-	1e-38	2e-39	157108483	85.71	A_aeg	Aedes aegypti	@Eukaryota@Metazoa	7159	;cellular organisms;Eukaryota;Opisthokonta;Metazoa;Eumetazoa;Bilateria;Protostomia;Ecdysozoa;Panarthropoda;Arthropoda;Mandibulata;Pancrustacea;Hexapoda;Insecta;Dicondylia;Pterygota;Neoptera;Holometabola;Diptera;Nematocera;Culicomorpha;Culicoidea;Culicidae;Culicinae;Aedini;Aedes;Stegomyia;Aedes aegypti;
-1.61	250	Minc10904	-	-	2e-07	-	-	-	-	4e-08	307209136	43.64	H_sal	Harpegnathos saltator	@Eukaryota@Metazoa	610380	;cellular organisms;Eukaryota;Opisthokonta;Metazoa;Eumetazoa;Bilateria;Protostomia;Ecdysozoa;Panarthropoda;Arthropoda;Mandibulata;Pancrustacea;Hexapoda;Insecta;Dicondylia;Pterygota;Neoptera;Holometabola;Hymenoptera;Apocrita;Aculeata;Vespoidea;Formicidae;Ponerinae;Ponerini;Harpegnathos;Harpegnathos saltator;
-1.61	157	Minc10943	-	-	1e-09	-	-	-	-	2e-10	268563008	42.45	C_bri	Caenorhabditis briggsae	@Eukaryota@Metazoa	6238	;cellular organisms;Eukaryota;Opisthokonta;Metazoa;Eumetazoa;Bilateria;Protostomia;Ecdysozoa;Nematoda;Chromadorea;Rhabditida;Rhabditoidea;Rhabditidae;Peloderinae;Caenorhabditis;Caenorhabditis briggsae;
-1.61	6	Minc04500	-	-	0.0001	-	-	-	-	2e-05	393906496	30.26	L_loa	Loa loa	@Eukaryota@Metazoa	7209	;cellular organisms;Eukaryota;Opisthokonta;Metazoa;Eumetazoa;Bilateria;Protostomia;Ecdysozoa;Nematoda;Chromadorea;Spirurida;Filarioidea;Onchocercidae;Loa;Loa loa;
-1.61	9	Minc02791	-	-	0.0003	-	-	-	0.0003	6e-05	268557114	43.18	C_bri	Caenorhabditis briggsae	@Eukaryota@Metazoa	6238	;cellular organisms;Eukaryota;Opisthokonta;Metazoa;Eumetazoa;Bilateria;Protostomia;Ecdysozoa;Nematoda;Chromadorea;Rhabditida;Rhabditoidea;Rhabditidae;Peloderinae;Caenorhabditis;Caenorhabditis briggsae;
-1.61	77	Minc09894	-	-	1e-07	-	-	-	1e-07	2e-08	405960831	33.04	C_gig	Crassostrea gigas	@Eukaryota@Metazoa	29159	;cellular organisms;Eukaryota;Opisthokonta;Metazoa;Eumetazoa;Bilateria;Protostomia;Lophotrochozoa;Mollusca;Bivalvia;Pteriomorphia;Ostreoida;Ostreoidea;Ostreidae;Crassostrea;Crassostrea gigas;
-1.61	10	Minc09906	-	-	0.0003	-	-	-	0.0003	6e-05	268557114	43.18	C_bri	Caenorhabditis briggsae	@Eukaryota@Metazoa	6238	;cellular organisms;Eukaryota;Opisthokonta;Metazoa;Eumetazoa;Bilateria;Protostomia;Ecdysozoa;Nematoda;Chromadorea;Rhabditida;Rhabditoidea;Rhabditidae;Peloderinae;Caenorhabditis;Caenorhabditis briggsae;
-1.61	252	Minc03205	-	-	4e-57	-	-	4e-57	-	8e-58	89269109	100	X_tro	Xenopus tropicalis	@Eukaryota@Metazoa	8364	;cellular organisms;Eukaryota;Opisthokonta;Metazoa;Eumetazoa;Bilateria;Deuterostomia;Chordata;Craniata;Vertebrata;Gnathostomata;Teleostomi;Euteleostomi;Sarcopterygii;Dipnotetrapodomorpha;Tetrapoda;Amphibia;Batrachia;Anura;Pipoidea;Pipidae;Xenopodinae;Xenopus;Silurana;Xenopus tropicalis;
-1.61	199	Minc03084	-	-	1e-05	-	-	-	-	2e-06	488590565	32.63	D_nov	Dasypus novemcinctus	@Eukaryota@Metazoa	9361	;cellular organisms;Eukaryota;Opisthokonta;Metazoa;Eumetazoa;Bilateria;Deuterostomia;Chordata;Craniata;Vertebrata;Gnathostomata;Teleostomi;Euteleostomi;Sarcopterygii;Dipnotetrapodomorpha;Tetrapoda;Amniota;Mammalia;Theria;Eutheria;Xenarthra;Cingulata;Dasypodidae;Dasypus;Dasypus novemcinctus;
-1.61	250	Minc18140	-	2e-20	-	-	-	-	-	4e-21	268559782	45.76	C_bri	Caenorhabditis briggsae	@Eukaryota@Metazoa	6238	;cellular organisms;Eukaryota;Opisthokonta;Metazoa;Eumetazoa;Bilateria;Protostomia;Ecdysozoa;Nematoda;Chromadorea;Rhabditida;Rhabditoidea;Rhabditidae;Peloderinae;Caenorhabditis;Caenorhabditis briggsae;
-1.71	124	Minc07681	-	-	5e-06	-	-	-	5e-06	9e-07	573892335	29.29	L_ocu	Lepisosteus oculatus	@Eukaryota@Metazoa	7918	;cellular organisms;Eukaryota;Opisthokonta;Metazoa;Eumetazoa;Bilateria;Deuterostomia;Chordata;Craniata;Vertebrata;Gnathostomata;Teleostomi;Euteleostomi;Actinopterygii;Actinopteri;Neopterygii;Holostei;Semionotiformes;Lepisosteidae;Lepisosteus;Lepisosteus oculatus;
-1.71	3	Minc18818	-	-	0.0005	-	-	-	-	9e-05	159163534	37.29	H_sap	Homo sapiens	@Eukaryota@Metazoa	9606	;cellular organisms;Eukaryota;Opisthokonta;Metazoa;Eumetazoa;Bilateria;Deuterostomia;Chordata;Craniata;Vertebrata;Gnathostomata;Teleostomi;Euteleostomi;Sarcopterygii;Dipnotetrapodomorpha;Tetrapoda;Amniota;Mammalia;Theria;Eutheria;Boreoeutheria;Euarchontoglires;Primates;Haplorrhini;Simiiformes;Catarrhini;Hominoidea;Hominidae;Homininae;Homo;Homo sapiens;
-1.74	145	Minc09127	-	0.0004	-	-	-	-	-	7e-05	303305112	70.97	P_van	Polypedilum vanderplanki	@Eukaryota@Metazoa	319348	;cellular organisms;Eukaryota;Opisthokonta;Metazoa;Eumetazoa;Bilateria;Protostomia;Ecdysozoa;Panarthropoda;Arthropoda;Mandibulata;Pancrustacea;Hexapoda;Insecta;Dicondylia;Pterygota;Neoptera;Holometabola;Diptera;Nematocera;Culicomorpha;Chironomoidea;Chironomidae;Chironominae;Chironomini;Polypedilum;Polypedilum vanderplanki;
-1.74	265	Minc02700	-	-	4e-14	-	-	4e-14	-	7e-15	501297956	28.77	R_ped	Riptortus pedestris	@Eukaryota@Metazoa	329032	;cellular organisms;Eukaryota;Opisthokonta;Metazoa;Eumetazoa;Bilateria;Protostomia;Ecdysozoa;Panarthropoda;Arthropoda;Mandibulata;Pancrustacea;Hexapoda;Insecta;Dicondylia;Pterygota;Neoptera;Paraneoptera;Hemiptera;Prosorrhyncha;Heteroptera;Euheteroptera;Neoheteroptera;Panheteroptera;Pentatomomorpha;Coreoidea;Alydidae;Riptortus;Riptortus pedestris;
-1.79	255	Minc16248	-	-	3e-13	-	-	3e-13	-	5e-14	156351416	35.25	N_vec	Nematostella vectensis	@Eukaryota@Metazoa	45351	;cellular organisms;Eukaryota;Opisthokonta;Metazoa;Eumetazoa;Cnidaria;Anthozoa;Hexacorallia;Actiniaria;Edwardsiidae;Nematostella;Nematostella vectensis;
-1.79	251	Minc04442	-	-	3e-17	-	-	-	-	5e-18	308464063	52.17	C_rem	Caenorhabditis remanei	@Eukaryota@Metazoa	31234	;cellular organisms;Eukaryota;Opisthokonta;Metazoa;Eumetazoa;Bilateria;Protostomia;Ecdysozoa;Nematoda;Chromadorea;Rhabditida;Rhabditoidea;Rhabditidae;Peloderinae;Caenorhabditis;Caenorhabditis remanei;
-1.79	10	Minc10696	-	-	6e-06	-	-	-	6e-06	1e-06	242024112	26.79	Pedic	Pediculus humanus corporis	@Eukaryota@Metazoa	121224	;cellular organisms;Eukaryota;Opisthokonta;Metazoa;Eumetazoa;Bilateria;Protostomia;Ecdysozoa;Panarthropoda;Arthropoda;Mandibulata;Pancrustacea;Hexapoda;Insecta;Dicondylia;Pterygota;Neoptera;Paraneoptera;Psocodea;Phthiraptera;Anoplura;Pediculidae;Pediculus;Pediculus humanus;Pediculus humanus corporis;
-1.79	250	Minc06888	-	-	6e-11	-	-	-	6e-11	1e-11	341903516	29.53	C_bre	Caenorhabditis brenneri	@Eukaryota@Metazoa	135651	;cellular organisms;Eukaryota;Opisthokonta;Metazoa;Eumetazoa;Bilateria;Protostomia;Ecdysozoa;Nematoda;Chromadorea;Rhabditida;Rhabditoidea;Rhabditidae;Peloderinae;Caenorhabditis;Caenorhabditis brenneri;
-1.79	35	Minc04030	-	-	3e-06	-	-	-	-	5e-07	391327358	33.77	G_occ	Galendromus occidentalis	@Eukaryota@Metazoa	34638	;cellular organisms;Eukaryota;Opisthokonta;Metazoa;Eumetazoa;Bilateria;Protostomia;Ecdysozoa;Panarthropoda;Arthropoda;Chelicerata;Arachnida;Acari;Parasitiformes;Mesostigmata;Monogynaspida;Gamasina;Phytoseioidea;Phytoseiidae;Typhlodrominae;Galendromus;Galendromus occidentalis;
-1.83	16	Minc17502	-	-	5e-06	-	-	-	5e-06	8e-07	260783237	32.14	B_flo	Branchiostoma floridae	@Eukaryota@Metazoa	7739	;cellular organisms;Eukaryota;Opisthokonta;Metazoa;Eumetazoa;Bilateria;Deuterostomia;Chordata;Cephalochordata;Branchiostomidae;Branchiostoma;Branchiostoma floridae;
-1.83	108	Minc04998	-	0.0005	-	-	-	-	-	8e-05	303305112	70.97	P_van	Polypedilum vanderplanki	@Eukaryota@Metazoa	319348	;cellular organisms;Eukaryota;Opisthokonta;Metazoa;Eumetazoa;Bilateria;Protostomia;Ecdysozoa;Panarthropoda;Arthropoda;Mandibulata;Pancrustacea;Hexapoda;Insecta;Dicondylia;Pterygota;Neoptera;Holometabola;Diptera;Nematocera;Culicomorpha;Chironomoidea;Chironomidae;Chironominae;Chironomini;Polypedilum;Polypedilum vanderplanki;
-1.83	219	Minc07226	-	-	5e-13	-	-	-	5e-13	8e-14	597841797	42.27	A_cey	Ancylostoma ceylanicum	@Eukaryota@Metazoa	53326	;cellular organisms;Eukaryota;Opisthokonta;Metazoa;Eumetazoa;Bilateria;Protostomia;Ecdysozoa;Nematoda;Chromadorea;Rhabditida;Strongylida;Ancylostomatoidea;Ancylostomatidae;Ancylostomatinae;Ancylostoma;Ancylostoma ceylanicum;
-1.9	252	Minc03468	-	-	2e-21	-	-	-	2e-21	3e-22	560118553	25.21	H_con	Haemonchus contortus	@Eukaryota@Metazoa	6289	;cellular organisms;Eukaryota;Opisthokonta;Metazoa;Eumetazoa;Bilateria;Protostomia;Ecdysozoa;Nematoda;Chromadorea;Rhabditida;Strongylida;Trichostrongyloidea;Haemonchidae;Haemonchinae;Haemonchus;Haemonchus contortus;
-1.9	270	Minc05890	-	-	2e-78	-	-	-	2e-78	3e-79	560132485	73.03	H_con	Haemonchus contortus	@Eukaryota@Metazoa	6289	;cellular organisms;Eukaryota;Opisthokonta;Metazoa;Eumetazoa;Bilateria;Protostomia;Ecdysozoa;Nematoda;Chromadorea;Rhabditida;Strongylida;Trichostrongyloidea;Haemonchidae;Haemonchinae;Haemonchus;Haemonchus contortus;
-1.9	251	Minc12050	-	-	2e-41	-	-	-	-	3e-42	312068823	39.81	L_loa	Loa loa	@Eukaryota@Metazoa	7209	;cellular organisms;Eukaryota;Opisthokonta;Metazoa;Eumetazoa;Bilateria;Protostomia;Ecdysozoa;Nematoda;Chromadorea;Spirurida;Filarioidea;Onchocercidae;Loa;Loa loa;
-1.9	10	Minc12282	-	-	0.0002	-	-	-	0.0002	3e-05	148709192	42	M_mus	Mus musculus	@Eukaryota@Metazoa	10090	;cellular organisms;Eukaryota;Opisthokonta;Metazoa;Eumetazoa;Bilateria;Deuterostomia;Chordata;Craniata;Vertebrata;Gnathostomata;Teleostomi;Euteleostomi;Sarcopterygii;Dipnotetrapodomorpha;Tetrapoda;Amniota;Mammalia;Theria;Eutheria;Boreoeutheria;Euarchontoglires;Glires;Rodentia;Myomorpha;Muroidea;Muridae;Murinae;Mus;Mus;Mus musculus;
-1.9	7	Minc03345	-	-	0.0004	-	-	-	-	6e-05	646704701	24.66	Z_nev	Zootermopsis nevadensis	@Eukaryota@Metazoa	136037	;cellular organisms;Eukaryota;Opisthokonta;Metazoa;Eumetazoa;Bilateria;Protostomia;Ecdysozoa;Panarthropoda;Arthropoda;Mandibulata;Pancrustacea;Hexapoda;Insecta;Dicondylia;Pterygota;Neoptera;Polyneoptera;Dictyoptera;Blattodea;Blattoidea;Termitoidae;Termopsidae;Termopsinae;Termopsini;Zootermopsis;Zootermopsis nevadensis;
-1.95	250	Minc07339	-	-	7e-16	-	-	-	7e-16	1e-16	632966551	33.33	C_mil	Callorhinchus milii	@Eukaryota@Metazoa	7868	;cellular organisms;Eukaryota;Opisthokonta;Metazoa;Eumetazoa;Bilateria;Deuterostomia;Chordata;Craniata;Vertebrata;Gnathostomata;Chondrichthyes;Holocephali;Chimaeriformes;Callorhinchidae;Callorhinchus;Callorhinchus milii;
-1.95	4	Minc13725	-	-	0.0007	-	-	0.0007	-	0.0001	341875353	25.33	C_bre	Caenorhabditis brenneri	@Eukaryota@Metazoa	135651	;cellular organisms;Eukaryota;Opisthokonta;Metazoa;Eumetazoa;Bilateria;Protostomia;Ecdysozoa;Nematoda;Chromadorea;Rhabditida;Rhabditoidea;Rhabditidae;Peloderinae;Caenorhabditis;Caenorhabditis brenneri;
-1.95	89	Minc00618	-	-	7e-06	-	-	-	7e-06	1e-06	345496453	33.94	N_vit	Nasonia vitripennis	@Eukaryota@Metazoa	7425	;cellular organisms;Eukaryota;Opisthokonta;Metazoa;Eumetazoa;Bilateria;Protostomia;Ecdysozoa;Panarthropoda;Arthropoda;Mandibulata;Pancrustacea;Hexapoda;Insecta;Dicondylia;Pterygota;Neoptera;Holometabola;Hymenoptera;Apocrita;Terebrantes;Chaldicoidea group;Chalcidoidea;Pteromalidae;Pteromalinae;Nasonia;Nasonia vitripennis;
-2.01	270	Minc03603	-	-	3e-68	-	-	-	3e-68	4e-69	560132485	67.76	H_con	Haemonchus contortus	@Eukaryota@Metazoa	6289	;cellular organisms;Eukaryota;Opisthokonta;Metazoa;Eumetazoa;Bilateria;Protostomia;Ecdysozoa;Nematoda;Chromadorea;Rhabditida;Strongylida;Trichostrongyloidea;Haemonchidae;Haemonchinae;Haemonchus;Haemonchus contortus;
-2.08	6	Minc18190	-	-	8e-05	-	-	-	8e-05	1e-05	568295721	43.1	N_ame	Necator americanus	@Eukaryota@Metazoa	51031	;cellular organisms;Eukaryota;Opisthokonta;Metazoa;Eumetazoa;Bilateria;Protostomia;Ecdysozoa;Nematoda;Chromadorea;Rhabditida;Strongylida;Ancylostomatoidea;Ancylostomatidae;Bunostominae;Necator;Necator americanus;
-2.08	250	Minc00174	-	-	4e-14	-	-	-	4e-14	5e-15	157136377	60.38	A_aeg	Aedes aegypti	@Eukaryota@Metazoa	7159	;cellular organisms;Eukaryota;Opisthokonta;Metazoa;Eumetazoa;Bilateria;Protostomia;Ecdysozoa;Panarthropoda;Arthropoda;Mandibulata;Pancrustacea;Hexapoda;Insecta;Dicondylia;Pterygota;Neoptera;Holometabola;Diptera;Nematocera;Culicomorpha;Culicoidea;Culicidae;Culicinae;Aedini;Aedes;Stegomyia;Aedes aegypti;
-2.12	52	Minc16742	-	5e-11	-	-	-	-	-	6e-12	156364499	31.18	N_vec	Nematostella vectensis	@Eukaryota@Metazoa	45351	;cellular organisms;Eukaryota;Opisthokonta;Metazoa;Eumetazoa;Cnidaria;Anthozoa;Hexacorallia;Actiniaria;Edwardsiidae;Nematostella;Nematostella vectensis;
-2.15	254	Minc05961	-	-	-	-	6e-12	-	-	7e-13	541042271	25.07	A_suu	Ascaris suum	@Eukaryota@Metazoa	6253	;cellular organisms;Eukaryota;Opisthokonta;Metazoa;Eumetazoa;Bilateria;Protostomia;Ecdysozoa;Nematoda;Chromadorea;Ascaridida;Ascaridoidea;Ascarididae;Ascaris;Ascaris suum;
-2.17	24	Minc00888	-	-	7e-05	-	-	7e-05	-	8e-06	393911072	41.79	L_loa	Loa loa	@Eukaryota@Metazoa	7209	;cellular organisms;Eukaryota;Opisthokonta;Metazoa;Eumetazoa;Bilateria;Protostomia;Ecdysozoa;Nematoda;Chromadorea;Spirurida;Filarioidea;Onchocercidae;Loa;Loa loa;
-2.17	17	Minc06428	-	-	7e-06	-	-	-	7e-06	8e-07	260783237	32.14	B_flo	Branchiostoma floridae	@Eukaryota@Metazoa	7739	;cellular organisms;Eukaryota;Opisthokonta;Metazoa;Eumetazoa;Bilateria;Deuterostomia;Chordata;Cephalochordata;Branchiostomidae;Branchiostoma;Branchiostoma floridae;
-2.17	17	Minc06431	-	-	7e-06	-	-	-	7e-06	8e-07	260783237	32.14	B_flo	Branchiostoma floridae	@Eukaryota@Metazoa	7739	;cellular organisms;Eukaryota;Opisthokonta;Metazoa;Eumetazoa;Bilateria;Deuterostomia;Chordata;Cephalochordata;Branchiostomidae;Branchiostoma;Branchiostoma floridae;
-2.18	250	Minc10398	-	-	8e-65	-	-	-	8e-65	9e-66	383856822	68.57	M_rot	Megachile rotundata	@Eukaryota@Metazoa	143995	;cellular organisms;Eukaryota;Opisthokonta;Metazoa;Eumetazoa;Bilateria;Protostomia;Ecdysozoa;Panarthropoda;Arthropoda;Mandibulata;Pancrustacea;Hexapoda;Insecta;Dicondylia;Pterygota;Neoptera;Holometabola;Hymenoptera;Apocrita;Aculeata;Apoidea;Megachilidae;Megachilinae;Megachilini;Megachile;Megachile rotundata;
-2.3	74	Minc12358	-	-	2e-07	-	-	-	2e-07	2e-08	405960831	33.04	C_gig	Crassostrea gigas	@Eukaryota@Metazoa	29159	;cellular organisms;Eukaryota;Opisthokonta;Metazoa;Eumetazoa;Bilateria;Protostomia;Lophotrochozoa;Mollusca;Bivalvia;Pteriomorphia;Ostreoida;Ostreoidea;Ostreidae;Crassostrea;Crassostrea gigas;
-2.3	16	Minc12696	-	-	4e-06	-	-	-	4e-06	4e-07	260783237	32.14	B_flo	Branchiostoma floridae	@Eukaryota@Metazoa	7739	;cellular organisms;Eukaryota;Opisthokonta;Metazoa;Eumetazoa;Bilateria;Deuterostomia;Chordata;Cephalochordata;Branchiostomidae;Branchiostoma;Branchiostoma floridae;
-2.3	55	Minc12574	-	7e-08	-	-	-	-	-	7e-09	260809552	33.77	B_flo	Branchiostoma floridae	@Eukaryota@Metazoa	7739	;cellular organisms;Eukaryota;Opisthokonta;Metazoa;Eumetazoa;Bilateria;Deuterostomia;Chordata;Cephalochordata;Branchiostomidae;Branchiostoma;Branchiostoma floridae;
-2.3	250	Minc01132	-	-	3e-30	-	-	-	-	3e-31	391344825	93.44	G_occ	Galendromus occidentalis	@Eukaryota@Metazoa	34638	;cellular organisms;Eukaryota;Opisthokonta;Metazoa;Eumetazoa;Bilateria;Protostomia;Ecdysozoa;Panarthropoda;Arthropoda;Chelicerata;Arachnida;Acari;Parasitiformes;Mesostigmata;Monogynaspida;Gamasina;Phytoseioidea;Phytoseiidae;Typhlodrominae;Galendromus;Galendromus occidentalis;
-2.3	44	Minc04670	-	3e-06	-	-	-	-	-	3e-07	568269677	32.43	N_ame	Necator americanus	@Eukaryota@Metazoa	51031	;cellular organisms;Eukaryota;Opisthokonta;Metazoa;Eumetazoa;Bilateria;Protostomia;Ecdysozoa;Nematoda;Chromadorea;Rhabditida;Strongylida;Ancylostomatoidea;Ancylostomatidae;Bunostominae;Necator;Necator americanus;
-2.3	67	Minc09213	-	-	2e-08	-	-	-	2e-08	2e-09	405960831	33.91	C_gig	Crassostrea gigas	@Eukaryota@Metazoa	29159	;cellular organisms;Eukaryota;Opisthokonta;Metazoa;Eumetazoa;Bilateria;Protostomia;Lophotrochozoa;Mollusca;Bivalvia;Pteriomorphia;Ostreoida;Ostreoidea;Ostreidae;Crassostrea;Crassostrea gigas;
-2.3	255	Minc12867	-	-	1e-11	-	-	-	1e-11	1e-12	391335321	32.79	G_occ	Galendromus occidentalis	@Eukaryota@Metazoa	34638	;cellular organisms;Eukaryota;Opisthokonta;Metazoa;Eumetazoa;Bilateria;Protostomia;Ecdysozoa;Panarthropoda;Arthropoda;Chelicerata;Arachnida;Acari;Parasitiformes;Mesostigmata;Monogynaspida;Gamasina;Phytoseioidea;Phytoseiidae;Typhlodrominae;Galendromus;Galendromus occidentalis;
-2.3	183	Minc07515	-	-	2e-06	-	-	-	2e-06	2e-07	332025603	29.51	A_ech	Acromyrmex echinatior	@Eukaryota@Metazoa	103372	;cellular organisms;Eukaryota;Opisthokonta;Metazoa;Eumetazoa;Bilateria;Protostomia;Ecdysozoa;Panarthropoda;Arthropoda;Mandibulata;Pancrustacea;Hexapoda;Insecta;Dicondylia;Pterygota;Neoptera;Holometabola;Hymenoptera;Apocrita;Aculeata;Vespoidea;Formicidae;Myrmicinae;Attini;Acromyrmex;Acromyrmex echinatior;
-2.3	35	Minc10199	-	-	2e-05	-	-	-	2e-05	2e-06	260783237	32.14	B_flo	Branchiostoma floridae	@Eukaryota@Metazoa	7739	;cellular organisms;Eukaryota;Opisthokonta;Metazoa;Eumetazoa;Bilateria;Deuterostomia;Chordata;Cephalochordata;Branchiostomidae;Branchiostoma;Branchiostoma floridae;
-2.3	250	Minc01699	-	-	3e-14	-	-	3e-14	-	3e-15	268553813	41.38	C_bri	Caenorhabditis briggsae	@Eukaryota@Metazoa	6238	;cellular organisms;Eukaryota;Opisthokonta;Metazoa;Eumetazoa;Bilateria;Protostomia;Ecdysozoa;Nematoda;Chromadorea;Rhabditida;Rhabditoidea;Rhabditidae;Peloderinae;Caenorhabditis;Caenorhabditis briggsae;
-2.3	250	Minc03289	-	-	2e-51	-	-	-	2e-51	2e-52	300791206	64.19	P_pun	Prionchulus punctatus	@Eukaryota@Metazoa	293874	;cellular organisms;Eukaryota;Opisthokonta;Metazoa;Eumetazoa;Bilateria;Protostomia;Ecdysozoa;Nematoda;Enoplea;Dorylaimia;Mononchida;Mononchina;Mononchoidea;Mononchidae;Prionchulinae;Prionchulus;Prionchulus punctatus;
-2.3	250	Minc17006	-	-	1e-30	-	-	-	1e-30	1e-31	170586718	48	B_mal	Brugia malayi	@Eukaryota@Metazoa	6279	;cellular organisms;Eukaryota;Opisthokonta;Metazoa;Eumetazoa;Bilateria;Protostomia;Ecdysozoa;Nematoda;Chromadorea;Spirurida;Filarioidea;Onchocercidae;Brugia;Brugia malayi;
-2.3	250	Minc03840	-	-	3e-23	-	-	-	3e-23	3e-24	597839091	55	A_cey	Ancylostoma ceylanicum	@Eukaryota@Metazoa	53326	;cellular organisms;Eukaryota;Opisthokonta;Metazoa;Eumetazoa;Bilateria;Protostomia;Ecdysozoa;Nematoda;Chromadorea;Rhabditida;Strongylida;Ancylostomatoidea;Ancylostomatidae;Ancylostomatinae;Ancylostoma;Ancylostoma ceylanicum;
-2.3	269	Minc16780	-	-	-	-	1e-17	-	-	1e-18	357602859	28.57	D_ple	Danaus plexippus	@Eukaryota@Metazoa	13037	;cellular organisms;Eukaryota;Opisthokonta;Metazoa;Eumetazoa;Bilateria;Protostomia;Ecdysozoa;Panarthropoda;Arthropoda;Mandibulata;Pancrustacea;Hexapoda;Insecta;Dicondylia;Pterygota;Neoptera;Holometabola;Amphiesmenoptera;Lepidoptera;Glossata;Neolepidoptera;Heteroneura;Ditrysia;Obtectomera;Papilionoidea;Nymphalidae;Danainae;Danaini;Danaina;Danaus;Danaus;Danaus plexippus;
-2.3	74	Minc00335	-	-	2e-07	-	-	-	2e-07	2e-08	405960831	33.04	C_gig	Crassostrea gigas	@Eukaryota@Metazoa	29159	;cellular organisms;Eukaryota;Opisthokonta;Metazoa;Eumetazoa;Bilateria;Protostomia;Lophotrochozoa;Mollusca;Bivalvia;Pteriomorphia;Ostreoida;Ostreoidea;Ostreidae;Crassostrea;Crassostrea gigas;
-2.3	250	Minc11447	-	-	4e-10	-	-	-	4e-10	4e-11	597846342	69.23	A_cey	Ancylostoma ceylanicum	@Eukaryota@Metazoa	53326	;cellular organisms;Eukaryota;Opisthokonta;Metazoa;Eumetazoa;Bilateria;Protostomia;Ecdysozoa;Nematoda;Chromadorea;Rhabditida;Strongylida;Ancylostomatoidea;Ancylostomatidae;Ancylostomatinae;Ancylostoma;Ancylostoma ceylanicum;
-2.3	250	Minc03903	-	-	2e-08	-	-	-	2e-08	2e-09	8953421	46.48	B_flo	Branchiostoma floridae	@Eukaryota@Metazoa	7739	;cellular organisms;Eukaryota;Opisthokonta;Metazoa;Eumetazoa;Bilateria;Deuterostomia;Chordata;Cephalochordata;Branchiostomidae;Branchiostoma;Branchiostoma floridae;
-2.3	250	Minc07434	-	-	2e-13	-	-	-	-	2e-14	307184605	33.69	C_flo	Camponotus floridanus	@Eukaryota@Metazoa	104421	;cellular organisms;Eukaryota;Opisthokonta;Metazoa;Eumetazoa;Bilateria;Protostomia;Ecdysozoa;Panarthropoda;Arthropoda;Mandibulata;Pancrustacea;Hexapoda;Insecta;Dicondylia;Pterygota;Neoptera;Holometabola;Hymenoptera;Apocrita;Aculeata;Vespoidea;Formicidae;Formicinae;Camponotini;Camponotus;Camponotus floridanus;
-2.3	250	Minc16380	-	-	1e-15	-	-	1e-15	-	1e-16	642128451	28.45	O_myk	Oncorhynchus mykiss	@Eukaryota@Metazoa	8022	;cellular organisms;Eukaryota;Opisthokonta;Metazoa;Eumetazoa;Bilateria;Deuterostomia;Chordata;Craniata;Vertebrata;Gnathostomata;Teleostomi;Euteleostomi;Actinopterygii;Actinopteri;Neopterygii;Teleostei;Osteoglossocephalai;Clupeocephala;Euteleosteomorpha;Protacanthopterygii;Salmoniformes;Salmonidae;Salmoninae;Oncorhynchus;Oncorhynchus mykiss;
-2.3	250	Minc06222	-	-	5e-08	-	-	-	-	5e-09	645030355	31.03	N_vit	Nasonia vitripennis	@Eukaryota@Metazoa	7425	;cellular organisms;Eukaryota;Opisthokonta;Metazoa;Eumetazoa;Bilateria;Protostomia;Ecdysozoa;Panarthropoda;Arthropoda;Mandibulata;Pancrustacea;Hexapoda;Insecta;Dicondylia;Pterygota;Neoptera;Holometabola;Hymenoptera;Apocrita;Terebrantes;Chaldicoidea group;Chalcidoidea;Pteromalidae;Pteromalinae;Nasonia;Nasonia vitripennis;
-2.3	250	Minc00597	-	-	2e-18	-	-	-	-	2e-19	73535743	67.21	H_sap	Homo sapiens	@Eukaryota@Metazoa	9606	;cellular organisms;Eukaryota;Opisthokonta;Metazoa;Eumetazoa;Bilateria;Deuterostomia;Chordata;Craniata;Vertebrata;Gnathostomata;Teleostomi;Euteleostomi;Sarcopterygii;Dipnotetrapodomorpha;Tetrapoda;Amniota;Mammalia;Theria;Eutheria;Boreoeutheria;Euarchontoglires;Primates;Haplorrhini;Simiiformes;Catarrhini;Hominoidea;Hominidae;Homininae;Homo;Homo sapiens;
-2.3	250	Minc13733	-	-	2e-08	-	-	-	-	2e-09	555702712	37.5	H_rob	Helobdella robusta	@Eukaryota@Metazoa	6412	;cellular organisms;Eukaryota;Opisthokonta;Metazoa;Eumetazoa;Bilateria;Protostomia;Lophotrochozoa;Annelida;Clitellata;Hirudinea;Rhynchobdellida;Glossiphoniidae;Helobdella;Helobdella robusta;
-2.3	251	Minc05276	-	1e-06	-	-	-	-	-	1e-07	110756134	39.24	A_mel	Apis mellifera	@Eukaryota@Metazoa	7460	;cellular organisms;Eukaryota;Opisthokonta;Metazoa;Eumetazoa;Bilateria;Protostomia;Ecdysozoa;Panarthropoda;Arthropoda;Mandibulata;Pancrustacea;Hexapoda;Insecta;Dicondylia;Pterygota;Neoptera;Holometabola;Hymenoptera;Apocrita;Aculeata;Apoidea;Apidae;Apinae;Apini;Apis;Apis mellifera;
-2.3	200	Minc08846	-	-	2e-23	-	-	-	-	2e-24	17540788	34.03	C_ele	Caenorhabditis elegans	@Eukaryota@Metazoa	6239	;cellular organisms;Eukaryota;Opisthokonta;Metazoa;Eumetazoa;Bilateria;Protostomia;Ecdysozoa;Nematoda;Chromadorea;Rhabditida;Rhabditoidea;Rhabditidae;Peloderinae;Caenorhabditis;Caenorhabditis elegans;
-2.41	250	Minc16332	-	-	1e-21	-	-	-	-	9e-23	291228549	35.12	S_kow	Saccoglossus kowalevskii	@Eukaryota@Metazoa	10224	;cellular organisms;Eukaryota;Opisthokonta;Metazoa;Eumetazoa;Bilateria;Deuterostomia;Hemichordata;Enteropneusta;Harrimaniidae;Saccoglossus;Saccoglossus kowalevskii;
-2.44	250	Minc03930	-	-	8e-22	-	-	8e-22	-	7e-23	402581070	57.97	W_ban	Wuchereria bancrofti	@Eukaryota@Metazoa	6293	;cellular organisms;Eukaryota;Opisthokonta;Metazoa;Eumetazoa;Bilateria;Protostomia;Ecdysozoa;Nematoda;Chromadorea;Spirurida;Filarioidea;Onchocercidae;Wuchereria;Wuchereria bancrofti;
-2.48	250	Minc17180	-	-	6e-43	-	-	-	-	5e-44	321449602	67.71	D_pul	Daphnia pulex	@Eukaryota@Metazoa	6669	;cellular organisms;Eukaryota;Opisthokonta;Metazoa;Eumetazoa;Bilateria;Protostomia;Ecdysozoa;Panarthropoda;Arthropoda;Mandibulata;Pancrustacea;Crustacea;Branchiopoda;Phyllopoda;Diplostraca;Cladocera;Anomopoda;Daphniidae;Daphnia;Daphnia pulex;
-2.53	250	Minc06203	-	-	1e-10	-	-	1e-10	-	8e-12	307178102	27.56	C_flo	Camponotus floridanus	@Eukaryota@Metazoa	104421	;cellular organisms;Eukaryota;Opisthokonta;Metazoa;Eumetazoa;Bilateria;Protostomia;Ecdysozoa;Panarthropoda;Arthropoda;Mandibulata;Pancrustacea;Hexapoda;Insecta;Dicondylia;Pterygota;Neoptera;Holometabola;Hymenoptera;Apocrita;Aculeata;Vespoidea;Formicidae;Formicinae;Camponotini;Camponotus;Camponotus floridanus;
-2.53	6	Minc12858	-	-	0.0005	-	-	-	-	4e-05	260804553	32.77	B_flo	Branchiostoma floridae	@Eukaryota@Metazoa	7739	;cellular organisms;Eukaryota;Opisthokonta;Metazoa;Eumetazoa;Bilateria;Deuterostomia;Chordata;Cephalochordata;Branchiostomidae;Branchiostoma;Branchiostoma floridae;
-2.53	250	Minc08710	-	-	1e-57	-	-	1e-57	-	8e-59	291226322	85.22	S_kow	Saccoglossus kowalevskii	@Eukaryota@Metazoa	10224	;cellular organisms;Eukaryota;Opisthokonta;Metazoa;Eumetazoa;Bilateria;Deuterostomia;Hemichordata;Enteropneusta;Harrimaniidae;Saccoglossus;Saccoglossus kowalevskii;
-2.55	250	Minc00172a	-	-	9e-53	-	-	-	9e-53	7e-54	300791206	65.54	P_pun	Prionchulus punctatus	@Eukaryota@Metazoa	293874	;cellular organisms;Eukaryota;Opisthokonta;Metazoa;Eumetazoa;Bilateria;Protostomia;Ecdysozoa;Nematoda;Enoplea;Dorylaimia;Mononchida;Mononchina;Mononchoidea;Mononchidae;Prionchulinae;Prionchulus;Prionchulus punctatus;
-2.59	250	Minc06320a	-	-	4e-14	-	-	-	4e-14	3e-15	268532772	32.67	C_bri	Caenorhabditis briggsae	@Eukaryota@Metazoa	6238	;cellular organisms;Eukaryota;Opisthokonta;Metazoa;Eumetazoa;Bilateria;Protostomia;Ecdysozoa;Nematoda;Chromadorea;Rhabditida;Rhabditoidea;Rhabditidae;Peloderinae;Caenorhabditis;Caenorhabditis briggsae;
-2.59	250	Minc07091	-	8e-12	-	-	-	-	-	6e-13	195440688	59.65	D_wil	Drosophila willistoni	@Eukaryota@Metazoa	7260	;cellular organisms;Eukaryota;Opisthokonta;Metazoa;Eumetazoa;Bilateria;Protostomia;Ecdysozoa;Panarthropoda;Arthropoda;Mandibulata;Pancrustacea;Hexapoda;Insecta;Dicondylia;Pterygota;Neoptera;Holometabola;Diptera;Brachycera;Muscomorpha;Eremoneura;Cyclorrhapha;Schizophora;Acalyptratae;Ephydroidea;Drosophilidae;Drosophilinae;Drosophilini;Drosophila;Sophophora;willistoni group;willistoni subgroup;Dros…
-2.59	4	Minc18358	-	-	0.0004	-	-	0.0004	-	3e-05	402590905	25.41	W_ban	Wuchereria bancrofti	@Eukaryota@Metazoa	6293	;cellular organisms;Eukaryota;Opisthokonta;Metazoa;Eumetazoa;Bilateria;Protostomia;Ecdysozoa;Nematoda;Chromadorea;Spirurida;Filarioidea;Onchocercidae;Wuchereria;Wuchereria bancrofti;
-2.59	9	Minc15569	-	-	0.0004	-	-	-	-	3e-05	597807490	55.56	A_mex	Astyanax mexicanus	@Eukaryota@Metazoa	7994	;cellular organisms;Eukaryota;Opisthokonta;Metazoa;Eumetazoa;Bilateria;Deuterostomia;Chordata;Craniata;Vertebrata;Gnathostomata;Teleostomi;Euteleostomi;Actinopterygii;Actinopteri;Neopterygii;Teleostei;Osteoglossocephalai;Clupeocephala;Otomorpha;Ostariophysi;Otophysi;Characiphysae;Characiformes;Characoidei;Characidae;Characidae incertae sedis;Astyanax clade;Astyanax;Astyanax mexicanus;
-2.59	253	Minc16373	-	-	4e-39	-	-	-	-	3e-40	268572243	36.25	C_bri	Caenorhabditis briggsae	@Eukaryota@Metazoa	6238	;cellular organisms;Eukaryota;Opisthokonta;Metazoa;Eumetazoa;Bilateria;Protostomia;Ecdysozoa;Nematoda;Chromadorea;Rhabditida;Rhabditoidea;Rhabditidae;Peloderinae;Caenorhabditis;Caenorhabditis briggsae;
-2.64	250	Minc01900	-	-	7e-11	-	-	-	7e-11	5e-12	350644831	63.04	S_man	Schistosoma mansoni	@Eukaryota@Metazoa	6183	;cellular organisms;Eukaryota;Opisthokonta;Metazoa;Eumetazoa;Bilateria;Platyhelminthes;Trematoda;Digenea;Strigeidida;Schistosomatoidea;Schistosomatidae;Schistosoma;Schistosoma mansoni;
-2.66	250	Minc16779	-	-	1e-14	-	-	-	-	7e-16	560126325	26.12	H_con	Haemonchus contortus	@Eukaryota@Metazoa	6289	;cellular organisms;Eukaryota;Opisthokonta;Metazoa;Eumetazoa;Bilateria;Protostomia;Ecdysozoa;Nematoda;Chromadorea;Rhabditida;Strongylida;Trichostrongyloidea;Haemonchidae;Haemonchinae;Haemonchus;Haemonchus contortus;
-2.71	250	Minc14396	-	-	6e-33	-	-	-	-	4e-34	46576851	72.29	A_suu	Ascaris suum	@Eukaryota@Metazoa	6253	;cellular organisms;Eukaryota;Opisthokonta;Metazoa;Eumetazoa;Bilateria;Protostomia;Ecdysozoa;Nematoda;Chromadorea;Ascaridida;Ascaridoidea;Ascarididae;Ascaris;Ascaris suum;
-2.71	250	Minc18659	-	-	3e-08	-	-	-	-	2e-09	268569436	39.24	C_bri	Caenorhabditis briggsae	@Eukaryota@Metazoa	6238	;cellular organisms;Eukaryota;Opisthokonta;Metazoa;Eumetazoa;Bilateria;Protostomia;Ecdysozoa;Nematoda;Chromadorea;Rhabditida;Rhabditoidea;Rhabditidae;Peloderinae;Caenorhabditis;Caenorhabditis briggsae;
-2.71	18	Minc06330	-	-	9e-06	-	-	-	9e-06	6e-07	339249291	29.33	T_spi	Trichinella spiralis	@Eukaryota@Metazoa	6334	;cellular organisms;Eukaryota;Opisthokonta;Metazoa;Eumetazoa;Bilateria;Protostomia;Ecdysozoa;Nematoda;Enoplea;Dorylaimia;Trichocephalida;Trichinellidae;Trichinella;Trichinella spiralis;
-2.71	4	Minc17211	-	0.0003	-	-	-	-	-	2e-05	541039090	39.71	A_suu	Ascaris suum	@Eukaryota@Metazoa	6253	;cellular organisms;Eukaryota;Opisthokonta;Metazoa;Eumetazoa;Bilateria;Protostomia;Ecdysozoa;Nematoda;Chromadorea;Ascaridida;Ascaridoidea;Ascarididae;Ascaris;Ascaris suum;
-2.71	251	Minc13404	-	-	3e-13	-	-	-	3e-13	2e-14	555705523	25.99	H_rob	Helobdella robusta	@Eukaryota@Metazoa	6412	;cellular organisms;Eukaryota;Opisthokonta;Metazoa;Eumetazoa;Bilateria;Protostomia;Lophotrochozoa;Annelida;Clitellata;Hirudinea;Rhynchobdellida;Glossiphoniidae;Helobdella;Helobdella robusta;
-2.71	63	Minc18630	-	-	6e-05	-	-	-	6e-05	4e-06	148232497	32.14	X_lae	Xenopus laevis	@Eukaryota@Metazoa	8355	;cellular organisms;Eukaryota;Opisthokonta;Metazoa;Eumetazoa;Bilateria;Deuterostomia;Chordata;Craniata;Vertebrata;Gnathostomata;Teleostomi;Euteleostomi;Sarcopterygii;Dipnotetrapodomorpha;Tetrapoda;Amphibia;Batrachia;Anura;Pipoidea;Pipidae;Xenopodinae;Xenopus;Xenopus;Xenopus laevis;
-2.71	250	Minc03057	-	3e-31	-	-	-	-	-	2e-32	47217884	45.28	T_nig	Tetraodon nigroviridis	@Eukaryota@Metazoa	99883	;cellular organisms;Eukaryota;Opisthokonta;Metazoa;Eumetazoa;Bilateria;Deuterostomia;Chordata;Craniata;Vertebrata;Gnathostomata;Teleostomi;Euteleostomi;Actinopterygii;Actinopteri;Neopterygii;Teleostei;Osteoglossocephalai;Clupeocephala;Euteleosteomorpha;Neoteleostei;Eurypterygia;Ctenosquamata;Acanthomorphata;Euacanthomorphacea;Percomorphaceae;Eupercaria;Tetraodontiformes;Tetraodontoidei;Tetradonto…
-2.81	46	Minc17340	-	5e-08	-	-	-	-	-	3e-09	597850296	24.21	A_cey	Ancylostoma ceylanicum	@Eukaryota@Metazoa	53326	;cellular organisms;Eukaryota;Opisthokonta;Metazoa;Eumetazoa;Bilateria;Protostomia;Ecdysozoa;Nematoda;Chromadorea;Rhabditida;Strongylida;Ancylostomatoidea;Ancylostomatidae;Ancylostomatinae;Ancylostoma;Ancylostoma ceylanicum;
-2.81	31	Minc14201	-	-	5e-09	-	-	-	-	3e-10	308458158	34.55	C_rem	Caenorhabditis remanei	@Eukaryota@Metazoa	31234	;cellular organisms;Eukaryota;Opisthokonta;Metazoa;Eumetazoa;Bilateria;Protostomia;Ecdysozoa;Nematoda;Chromadorea;Rhabditida;Rhabditoidea;Rhabditidae;Peloderinae;Caenorhabditis;Caenorhabditis remanei;
-2.81	258	Minc02130	-	-	-	-	5e-15	-	-	3e-16	195579662	27.98	D_sim	Drosophila simulans	@Eukaryota@Metazoa	7240	;cellular organisms;Eukaryota;Opisthokonta;Metazoa;Eumetazoa;Bilateria;Protostomia;Ecdysozoa;Panarthropoda;Arthropoda;Mandibulata;Pancrustacea;Hexapoda;Insecta;Dicondylia;Pterygota;Neoptera;Holometabola;Diptera;Brachycera;Muscomorpha;Eremoneura;Cyclorrhapha;Schizophora;Acalyptratae;Ephydroidea;Drosophilidae;Drosophilinae;Drosophilini;Drosophila;Sophophora;melanogaster group;melanogaster subgroup;…
-2.81	45	Minc18528	-	5e-05	-	-	-	-	-	3e-06	158285436	39.24	Anoph	Anopheles gambiae str. PEST	@Eukaryota@Metazoa	180454	;cellular organisms;Eukaryota;Opisthokonta;Metazoa;Eumetazoa;Bilateria;Protostomia;Ecdysozoa;Panarthropoda;Arthropoda;Mandibulata;Pancrustacea;Hexapoda;Insecta;Dicondylia;Pterygota;Neoptera;Holometabola;Diptera;Nematocera;Culicomorpha;Culicoidea;Culicidae;Anophelinae;Anopheles;Cellia;Pyretophorus;gambiae species complex;Anopheles gambiae;Anopheles gambiae str. PEST;
-2.81	250	Minc13833	-	-	1e-16	-	-	1e-16	-	6e-18	584596246	45.69	P_red	Panagrellus redivivus	@Eukaryota@Metazoa	6233	;cellular organisms;Eukaryota;Opisthokonta;Metazoa;Eumetazoa;Bilateria;Protostomia;Ecdysozoa;Nematoda;Chromadorea;Rhabditida;Panagrolaimoidea;Panagrolaimidae;Panagrellus;Panagrellus redivivus;
-2.81	250	Minc13940	-	-	1e-09	-	-	1e-09	-	6e-11	17568379	48.86	C_ele	Caenorhabditis elegans	@Eukaryota@Metazoa	6239	;cellular organisms;Eukaryota;Opisthokonta;Metazoa;Eumetazoa;Bilateria;Protostomia;Ecdysozoa;Nematoda;Chromadorea;Rhabditida;Rhabditoidea;Rhabditidae;Peloderinae;Caenorhabditis;Caenorhabditis elegans;
-2.86	250	Minc11476	-	-	7e-44	-	-	-	-	4e-45	391331957	67.96	G_occ	Galendromus occidentalis	@Eukaryota@Metazoa	34638	;cellular organisms;Eukaryota;Opisthokonta;Metazoa;Eumetazoa;Bilateria;Protostomia;Ecdysozoa;Panarthropoda;Arthropoda;Chelicerata;Arachnida;Acari;Parasitiformes;Mesostigmata;Monogynaspida;Gamasina;Phytoseioidea;Phytoseiidae;Typhlodrominae;Galendromus;Galendromus occidentalis;
-2.86	18	Minc06057	-	-	0.0007	-	-	-	0.0007	4e-05	46394468	37.7	P_pac	Pristionchus pacificus	@Eukaryota@Metazoa	54126	;cellular organisms;Eukaryota;Opisthokonta;Metazoa;Eumetazoa;Bilateria;Protostomia;Ecdysozoa;Nematoda;Chromadorea;Diplogasterida;Neodiplogasteridae;Pristionchus;Pristionchus pacificus;
-2.89	250	Minc14061	-	-	9e-15	-	-	-	9e-15	5e-16	597841797	36.52	A_cey	Ancylostoma ceylanicum	@Eukaryota@Metazoa	53326	;cellular organisms;Eukaryota;Opisthokonta;Metazoa;Eumetazoa;Bilateria;Protostomia;Ecdysozoa;Nematoda;Chromadorea;Rhabditida;Strongylida;Ancylostomatoidea;Ancylostomatidae;Ancylostomatinae;Ancylostoma;Ancylostoma ceylanicum;
-3	5	Minc05540	-	-	0.0001	-	-	-	-	5e-06	568289604	36.51	N_ame	Necator americanus	@Eukaryota@Metazoa	51031	;cellular organisms;Eukaryota;Opisthokonta;Metazoa;Eumetazoa;Bilateria;Protostomia;Ecdysozoa;Nematoda;Chromadorea;Rhabditida;Strongylida;Ancylostomatoidea;Ancylostomatidae;Bunostominae;Necator;Necator americanus;
-3	115	Minc11397	-	-	2e-05	-	-	-	2e-05	1e-06	195480068	44	D_yak	Drosophila yakuba	@Eukaryota@Metazoa	7245	;cellular organisms;Eukaryota;Opisthokonta;Metazoa;Eumetazoa;Bilateria;Protostomia;Ecdysozoa;Panarthropoda;Arthropoda;Mandibulata;Pancrustacea;Hexapoda;Insecta;Dicondylia;Pterygota;Neoptera;Holometabola;Diptera;Brachycera;Muscomorpha;Eremoneura;Cyclorrhapha;Schizophora;Acalyptratae;Ephydroidea;Drosophilidae;Drosophilinae;Drosophilini;Drosophila;Sophophora;melanogaster group;melanogaster subgroup;…
-3	3	Minc04303	-	-	0.0002	-	-	-	0.0002	1e-05	405974699	26.32	C_gig	Crassostrea gigas	@Eukaryota@Metazoa	29159	;cellular organisms;Eukaryota;Opisthokonta;Metazoa;Eumetazoa;Bilateria;Protostomia;Lophotrochozoa;Mollusca;Bivalvia;Pteriomorphia;Ostreoida;Ostreoidea;Ostreidae;Crassostrea;Crassostrea gigas;
-3	250	Minc12942	-	-	2e-07	-	-	-	-	1e-08	313241946	30.66	O_dio	Oikopleura dioica	@Eukaryota@Metazoa	34765	;cellular organisms;Eukaryota;Opisthokonta;Metazoa;Eumetazoa;Bilateria;Deuterostomia;Chordata;Tunicata;Appendicularia;Oikopleuridae;Oikopleura;Oikopleura dioica;
-3	250	Minc14931	-	-	8e-33	-	-	8e-33	-	4e-34	560121191	86.57	H_con	Haemonchus contortus	@Eukaryota@Metazoa	6289	;cellular organisms;Eukaryota;Opisthokonta;Metazoa;Eumetazoa;Bilateria;Protostomia;Ecdysozoa;Nematoda;Chromadorea;Rhabditida;Strongylida;Trichostrongyloidea;Haemonchidae;Haemonchinae;Haemonchus;Haemonchus contortus;
-3	73	Minc17144	-	-	2e-07	-	-	-	-	1e-08	405960831	33.04	C_gig	Crassostrea gigas	@Eukaryota@Metazoa	29159	;cellular organisms;Eukaryota;Opisthokonta;Metazoa;Eumetazoa;Bilateria;Protostomia;Lophotrochozoa;Mollusca;Bivalvia;Pteriomorphia;Ostreoida;Ostreoidea;Ostreidae;Crassostrea;Crassostrea gigas;
-3	250	Minc11326	-	-	1e-08	-	-	-	-	5e-10	307215342	57.78	H_sal	Harpegnathos saltator	@Eukaryota@Metazoa	610380	;cellular organisms;Eukaryota;Opisthokonta;Metazoa;Eumetazoa;Bilateria;Protostomia;Ecdysozoa;Panarthropoda;Arthropoda;Mandibulata;Pancrustacea;Hexapoda;Insecta;Dicondylia;Pterygota;Neoptera;Holometabola;Hymenoptera;Apocrita;Aculeata;Vespoidea;Formicidae;Ponerinae;Ponerini;Harpegnathos;Harpegnathos saltator;
-3	250	Minc02238	-	-	8e-33	-	-	8e-33	-	4e-34	560121191	86.57	H_con	Haemonchus contortus	@Eukaryota@Metazoa	6289	;cellular organisms;Eukaryota;Opisthokonta;Metazoa;Eumetazoa;Bilateria;Protostomia;Ecdysozoa;Nematoda;Chromadorea;Rhabditida;Strongylida;Trichostrongyloidea;Haemonchidae;Haemonchinae;Haemonchus;Haemonchus contortus;
-3	8	Minc15959	-	-	6e-05	-	-	-	-	3e-06	568298547	33.64	N_ame	Necator americanus	@Eukaryota@Metazoa	51031	;cellular organisms;Eukaryota;Opisthokonta;Metazoa;Eumetazoa;Bilateria;Protostomia;Ecdysozoa;Nematoda;Chromadorea;Rhabditida;Strongylida;Ancylostomatoidea;Ancylostomatidae;Bunostominae;Necator;Necator americanus;
-3	251	Minc06938	-	6e-55	-	-	-	-	-	3e-56	170593633	52.66	B_mal	Brugia malayi	@Eukaryota@Metazoa	6279	;cellular organisms;Eukaryota;Opisthokonta;Metazoa;Eumetazoa;Bilateria;Protostomia;Ecdysozoa;Nematoda;Chromadorea;Spirurida;Filarioidea;Onchocercidae;Brugia;Brugia malayi;
-3	250	Minc14304b	-	-	4e-12	-	-	4e-12	-	2e-13	402593816	72.92	W_ban	Wuchereria bancrofti	@Eukaryota@Metazoa	6293	;cellular organisms;Eukaryota;Opisthokonta;Metazoa;Eumetazoa;Bilateria;Protostomia;Ecdysozoa;Nematoda;Chromadorea;Spirurida;Filarioidea;Onchocercidae;Wuchereria;Wuchereria bancrofti;
-3.1	58	Minc09838	-	-	2e-07	-	-	-	2e-07	9e-09	405960831	33.04	C_gig	Crassostrea gigas	@Eukaryota@Metazoa	29159	;cellular organisms;Eukaryota;Opisthokonta;Metazoa;Eumetazoa;Bilateria;Protostomia;Lophotrochozoa;Mollusca;Bivalvia;Pteriomorphia;Ostreoida;Ostreoidea;Ostreidae;Crassostrea;Crassostrea gigas;
-3.1	250	Minc18880	-	-	2e-07	-	-	-	2e-07	9e-09	313224233	23.11	O_dio	Oikopleura dioica	@Eukaryota@Metazoa	34765	;cellular organisms;Eukaryota;Opisthokonta;Metazoa;Eumetazoa;Bilateria;Deuterostomia;Chordata;Tunicata;Appendicularia;Oikopleuridae;Oikopleura;Oikopleura dioica;
-3.1	250	Minc17916	-	-	2e-10	-	-	2e-10	-	9e-12	607354690	48.48	C_bir	Cerapachys biroi	@Eukaryota@Metazoa	443821	;cellular organisms;Eukaryota;Opisthokonta;Metazoa;Eumetazoa;Bilateria;Protostomia;Ecdysozoa;Panarthropoda;Arthropoda;Mandibulata;Pancrustacea;Hexapoda;Insecta;Dicondylia;Pterygota;Neoptera;Holometabola;Hymenoptera;Apocrita;Aculeata;Vespoidea;Formicidae;Cerapachyinae;Cerapachyini;Cerapachys;Cerapachys biroi;
-3.1	501	Minc05984	-	-	2e-34	-	-	2e-34	-	9e-36	585654623	35.37	S_kow	Saccoglossus kowalevskii	@Eukaryota@Metazoa	10224	;cellular organisms;Eukaryota;Opisthokonta;Metazoa;Eumetazoa;Bilateria;Deuterostomia;Hemichordata;Enteropneusta;Harrimaniidae;Saccoglossus;Saccoglossus kowalevskii;
-3.1	67	Minc10732a	-	-	2e-11	-	-	-	2e-11	9e-13	260807681	32.28	B_flo	Branchiostoma floridae	@Eukaryota@Metazoa	7739	;cellular organisms;Eukaryota;Opisthokonta;Metazoa;Eumetazoa;Bilateria;Deuterostomia;Chordata;Cephalochordata;Branchiostomidae;Branchiostoma;Branchiostoma floridae;
-3.1	263	Minc01818b	-	-	-	-	2e-14	-	-	9e-16	157119874	28.3	A_aeg	Aedes aegypti	@Eukaryota@Metazoa	7159	;cellular organisms;Eukaryota;Opisthokonta;Metazoa;Eumetazoa;Bilateria;Protostomia;Ecdysozoa;Panarthropoda;Arthropoda;Mandibulata;Pancrustacea;Hexapoda;Insecta;Dicondylia;Pterygota;Neoptera;Holometabola;Diptera;Nematocera;Culicomorpha;Culicoidea;Culicidae;Culicinae;Aedini;Aedes;Stegomyia;Aedes aegypti;
-3.11	251	Minc04171	-	-	9e-09	-	-	-	9e-09	4e-10	568248970	22.17	A_dar	Anopheles darlingi	@Eukaryota@Metazoa	43151	;cellular organisms;Eukaryota;Opisthokonta;Metazoa;Eumetazoa;Bilateria;Protostomia;Ecdysozoa;Panarthropoda;Arthropoda;Mandibulata;Pancrustacea;Hexapoda;Insecta;Dicondylia;Pterygota;Neoptera;Holometabola;Diptera;Nematocera;Culicomorpha;Culicoidea;Culicidae;Anophelinae;Anopheles;Nyssorhynchus;argyritarsis section;argyritarsis series;darlingi group;Anopheles darlingi;
-3.22	250	Minc06769	-	-	1e-69	-	-	-	-	4e-71	386306319	88	R_les	Rousettus leschenaultii	@Eukaryota@Metazoa	9408	;cellular organisms;Eukaryota;Opisthokonta;Metazoa;Eumetazoa;Bilateria;Deuterostomia;Chordata;Craniata;Vertebrata;Gnathostomata;Teleostomi;Euteleostomi;Sarcopterygii;Dipnotetrapodomorpha;Tetrapoda;Amniota;Mammalia;Theria;Eutheria;Boreoeutheria;Laurasiatheria;Chiroptera;Megachiroptera;Pteropodidae;Pteropodinae;Rousettus;Rousettus leschenaultii;
-3.22	23	Minc03490	-	-	5e-06	-	-	5e-06	-	2e-07	71997687	24.68	C_ele	Caenorhabditis elegans	@Eukaryota@Metazoa	6239	;cellular organisms;Eukaryota;Opisthokonta;Metazoa;Eumetazoa;Bilateria;Protostomia;Ecdysozoa;Nematoda;Chromadorea;Rhabditida;Rhabditoidea;Rhabditidae;Peloderinae;Caenorhabditis;Caenorhabditis elegans;
-3.22	263	Minc01818a	-	-	-	-	2e-14	-	-	8e-16	157119874	28.3	A_aeg	Aedes aegypti	@Eukaryota@Metazoa	7159	;cellular organisms;Eukaryota;Opisthokonta;Metazoa;Eumetazoa;Bilateria;Protostomia;Ecdysozoa;Panarthropoda;Arthropoda;Mandibulata;Pancrustacea;Hexapoda;Insecta;Dicondylia;Pterygota;Neoptera;Holometabola;Diptera;Nematocera;Culicomorpha;Culicoidea;Culicidae;Culicinae;Aedini;Aedes;Stegomyia;Aedes aegypti;
-3.22	294	Minc03897b	-	-	5e-08	-	-	-	5e-08	2e-09	8953421	45.45	B_flo	Branchiostoma floridae	@Eukaryota@Metazoa	7739	;cellular organisms;Eukaryota;Opisthokonta;Metazoa;Eumetazoa;Bilateria;Deuterostomia;Chordata;Cephalochordata;Branchiostomidae;Branchiostoma;Branchiostoma floridae;
-3.22	251	Minc12202	-	-	1e-08	-	-	1e-08	-	4e-10	410931369	25.57	T_rub	Takifugu rubripes	@Eukaryota@Metazoa	31033	;cellular organisms;Eukaryota;Opisthokonta;Metazoa;Eumetazoa;Bilateria;Deuterostomia;Chordata;Craniata;Vertebrata;Gnathostomata;Teleostomi;Euteleostomi;Actinopterygii;Actinopteri;Neopterygii;Teleostei;Osteoglossocephalai;Clupeocephala;Euteleosteomorpha;Neoteleostei;Eurypterygia;Ctenosquamata;Acanthomorphata;Euacanthomorphacea;Percomorphaceae;Eupercaria;Tetraodontiformes;Tetraodontoidei;Tetradonto…
-3.22	250	Minc18061	-	-	2e-55	-	-	-	2e-55	8e-57	4507773	62.16	H_sap	Homo sapiens	@Eukaryota@Metazoa	9606	;cellular organisms;Eukaryota;Opisthokonta;Metazoa;Eumetazoa;Bilateria;Deuterostomia;Chordata;Craniata;Vertebrata;Gnathostomata;Teleostomi;Euteleostomi;Sarcopterygii;Dipnotetrapodomorpha;Tetrapoda;Amniota;Mammalia;Theria;Eutheria;Boreoeutheria;Euarchontoglires;Primates;Haplorrhini;Simiiformes;Catarrhini;Hominoidea;Hominidae;Homininae;Homo;Homo sapiens;
-3.22	250	Minc01233	-	-	5e-36	-	-	5e-36	-	2e-37	525330288	79.27	S_ari	Sudhausia aristotokia	@Eukaryota@Metazoa	1357959	;cellular organisms;Eukaryota;Opisthokonta;Metazoa;Eumetazoa;Bilateria;Protostomia;Ecdysozoa;Nematoda;Chromadorea;Rhabditida;Rhabditoidea;Diplogastridae;Sudhausia;Sudhausia aristotokia;
-3.28	267	Minc03791	-	-	8e-14	-	-	-	8e-14	3e-15	541041110	42.73	A_suu	Ascaris suum	@Eukaryota@Metazoa	6253	;cellular organisms;Eukaryota;Opisthokonta;Metazoa;Eumetazoa;Bilateria;Protostomia;Ecdysozoa;Nematoda;Chromadorea;Ascaridida;Ascaridoidea;Ascarididae;Ascaris;Ascaris suum;
-3.35	250	Minc08172	-	-	2e-12	-	-	2e-12	-	7e-14	587007014	30.49	F_cat	Felis catus	@Eukaryota@Metazoa	9685	;cellular organisms;Eukaryota;Opisthokonta;Metazoa;Eumetazoa;Bilateria;Deuterostomia;Chordata;Craniata;Vertebrata;Gnathostomata;Teleostomi;Euteleostomi;Sarcopterygii;Dipnotetrapodomorpha;Tetrapoda;Amniota;Mammalia;Theria;Eutheria;Boreoeutheria;Laurasiatheria;Carnivora;Feliformia;Felidae;Felinae;Felis;Felis catus;
-3.4	387	Minc03273	-	-	6e-64	-	-	-	6e-64	2e-65	56693312	69.78	D_rer	Danio rerio	@Eukaryota@Metazoa	7955	;cellular organisms;Eukaryota;Opisthokonta;Metazoa;Eumetazoa;Bilateria;Deuterostomia;Chordata;Craniata;Vertebrata;Gnathostomata;Teleostomi;Euteleostomi;Actinopterygii;Actinopteri;Neopterygii;Teleostei;Osteoglossocephalai;Clupeocephala;Otomorpha;Ostariophysi;Otophysi;Cypriniphysae;Cypriniformes;Cyprinoidea;Cyprinidae;Danio;Danio rerio;
-3.4	13	Minc04736	-	-	9e-06	-	-	-	-	3e-07	560116309	26.49	H_con	Haemonchus contortus	@Eukaryota@Metazoa	6289	;cellular organisms;Eukaryota;Opisthokonta;Metazoa;Eumetazoa;Bilateria;Protostomia;Ecdysozoa;Nematoda;Chromadorea;Rhabditida;Strongylida;Trichostrongyloidea;Haemonchidae;Haemonchinae;Haemonchus;Haemonchus contortus;
-3.4	18	Minc06065	-	6e-05	-	-	-	-	-	2e-06	308451661	56	C_rem	Caenorhabditis remanei	@Eukaryota@Metazoa	31234	;cellular organisms;Eukaryota;Opisthokonta;Metazoa;Eumetazoa;Bilateria;Protostomia;Ecdysozoa;Nematoda;Chromadorea;Rhabditida;Rhabditoidea;Rhabditidae;Peloderinae;Caenorhabditis;Caenorhabditis remanei;
-3.4	250	Minc14165b	-	-	3e-38	-	-	3e-38	-	1e-39	308450808	98.51	C_rem	Caenorhabditis remanei	@Eukaryota@Metazoa	31234	;cellular organisms;Eukaryota;Opisthokonta;Metazoa;Eumetazoa;Bilateria;Protostomia;Ecdysozoa;Nematoda;Chromadorea;Rhabditida;Rhabditoidea;Rhabditidae;Peloderinae;Caenorhabditis;Caenorhabditis remanei;
-3.4	17	Minc07229	-	-	6e-05	-	-	-	-	2e-06	170584389	51.22	B_mal	Brugia malayi	@Eukaryota@Metazoa	6279	;cellular organisms;Eukaryota;Opisthokonta;Metazoa;Eumetazoa;Bilateria;Protostomia;Ecdysozoa;Nematoda;Chromadorea;Spirurida;Filarioidea;Onchocercidae;Brugia;Brugia malayi;
-3.4	34	Minc08845c	-	-	6e-08	-	-	-	-	2e-09	17540790	32.65	C_ele	Caenorhabditis elegans	@Eukaryota@Metazoa	6239	;cellular organisms;Eukaryota;Opisthokonta;Metazoa;Eumetazoa;Bilateria;Protostomia;Ecdysozoa;Nematoda;Chromadorea;Rhabditida;Rhabditoidea;Rhabditidae;Peloderinae;Caenorhabditis;Caenorhabditis elegans;
-3.51	58	Minc00573	-	-	1e-13	-	-	-	1e-13	3e-15	465956930	28.57	C_myd	Chelonia mydas	@Eukaryota@Metazoa	8469	;cellular organisms;Eukaryota;Opisthokonta;Metazoa;Eumetazoa;Bilateria;Deuterostomia;Chordata;Craniata;Vertebrata;Gnathostomata;Teleostomi;Euteleostomi;Sarcopterygii;Dipnotetrapodomorpha;Tetrapoda;Amniota;Sauropsida;Sauria;Archelosauria;Testudines;Cryptodira;Durocryptodira;Americhelydia;Chelonioidea;Cheloniidae;Chelonia;Chelonia mydas;
-3.51	70	Minc12331	-	-	1e-06	-	-	-	1e-06	3e-08	341891983	40.43	C_bre	Caenorhabditis brenneri	@Eukaryota@Metazoa	135651	;cellular organisms;Eukaryota;Opisthokonta;Metazoa;Eumetazoa;Bilateria;Protostomia;Ecdysozoa;Nematoda;Chromadorea;Rhabditida;Rhabditoidea;Rhabditidae;Peloderinae;Caenorhabditis;Caenorhabditis brenneri;
-3.51	251	Minc15137	-	3e-38	-	-	-	-	-	9e-40	341885659	36.76	C_bre	Caenorhabditis brenneri	@Eukaryota@Metazoa	135651	;cellular organisms;Eukaryota;Opisthokonta;Metazoa;Eumetazoa;Bilateria;Protostomia;Ecdysozoa;Nematoda;Chromadorea;Rhabditida;Rhabditoidea;Rhabditidae;Peloderinae;Caenorhabditis;Caenorhabditis brenneri;
-3.51	252	Minc17355	-	-	3e-38	-	-	3e-38	-	9e-40	395841746	78.75	O_gar	Otolemur garnettii	@Eukaryota@Metazoa	30611	;cellular organisms;Eukaryota;Opisthokonta;Metazoa;Eumetazoa;Bilateria;Deuterostomia;Chordata;Craniata;Vertebrata;Gnathostomata;Teleostomi;Euteleostomi;Sarcopterygii;Dipnotetrapodomorpha;Tetrapoda;Amniota;Mammalia;Theria;Eutheria;Boreoeutheria;Euarchontoglires;Primates;Strepsirrhini;Lorisiformes;Galagidae;Otolemur;Otolemur garnettii;
-3.51	250	Minc06617	-	-	1e-24	-	-	-	-	3e-26	312075308	72.58	L_loa	Loa loa	@Eukaryota@Metazoa	7209	;cellular organisms;Eukaryota;Opisthokonta;Metazoa;Eumetazoa;Bilateria;Protostomia;Ecdysozoa;Nematoda;Chromadorea;Spirurida;Filarioidea;Onchocercidae;Loa;Loa loa;
-3.51	251	Minc04622	-	-	2e-13	-	-	2e-13	-	6e-15	402592688	34.78	W_ban	Wuchereria bancrofti	@Eukaryota@Metazoa	6293	;cellular organisms;Eukaryota;Opisthokonta;Metazoa;Eumetazoa;Bilateria;Protostomia;Ecdysozoa;Nematoda;Chromadorea;Spirurida;Filarioidea;Onchocercidae;Wuchereria;Wuchereria bancrofti;
-3.51	33	Minc12208	-	-	2e-06	-	-	-	2e-06	6e-08	308450398	48.08	C_rem	Caenorhabditis remanei	@Eukaryota@Metazoa	31234	;cellular organisms;Eukaryota;Opisthokonta;Metazoa;Eumetazoa;Bilateria;Protostomia;Ecdysozoa;Nematoda;Chromadorea;Rhabditida;Rhabditoidea;Rhabditidae;Peloderinae;Caenorhabditis;Caenorhabditis remanei;
-3.51	250	Minc18311c	-	1e-20	-	-	-	-	-	3e-22	578359006	32.39	A_jap	Apriona japonica	@Eukaryota@Metazoa	692975	;cellular organisms;Eukaryota;Opisthokonta;Metazoa;Eumetazoa;Bilateria;Protostomia;Ecdysozoa;Panarthropoda;Arthropoda;Mandibulata;Pancrustacea;Hexapoda;Insecta;Dicondylia;Pterygota;Neoptera;Holometabola;Coleoptera;Polyphaga;Cucujiformia;Chrysomeloidea;Cerambycidae;Lamiinae;Batocerini;Apriona;Apriona japonica;
-3.51	250	Minc05371	-	-	1e-24	-	-	-	-	3e-26	312075308	72.58	L_loa	Loa loa	@Eukaryota@Metazoa	7209	;cellular organisms;Eukaryota;Opisthokonta;Metazoa;Eumetazoa;Bilateria;Protostomia;Ecdysozoa;Nematoda;Chromadorea;Spirurida;Filarioidea;Onchocercidae;Loa;Loa loa;
-3.51	250	Minc00650	-	-	1e-13	-	-	-	-	3e-15	391330148	40	G_occ	Galendromus occidentalis	@Eukaryota@Metazoa	34638	;cellular organisms;Eukaryota;Opisthokonta;Metazoa;Eumetazoa;Bilateria;Protostomia;Ecdysozoa;Panarthropoda;Arthropoda;Chelicerata;Arachnida;Acari;Parasitiformes;Mesostigmata;Monogynaspida;Gamasina;Phytoseioidea;Phytoseiidae;Typhlodrominae;Galendromus;Galendromus occidentalis;
-3.56	250	Minc13956	-	-	7e-63	-	-	7e-63	-	2e-64	17509199	100	C_ele	Caenorhabditis elegans	@Eukaryota@Metazoa	6239	;cellular organisms;Eukaryota;Opisthokonta;Metazoa;Eumetazoa;Bilateria;Protostomia;Ecdysozoa;Nematoda;Chromadorea;Rhabditida;Rhabditoidea;Rhabditidae;Peloderinae;Caenorhabditis;Caenorhabditis elegans;
-3.56	250	Minc17702	-	7e-25	-	-	-	-	-	2e-26	256709248	77.42	O_att	Oigolaimella attenuata	@Eukaryota@Metazoa	669116	;cellular organisms;Eukaryota;Opisthokonta;Metazoa;Eumetazoa;Bilateria;Protostomia;Ecdysozoa;Nematoda;Chromadorea;Rhabditida;Rhabditoidea;Diplogastridae;Oigolaimella;Oigolaimella attenuata;
-3.56	250	Minc02369	-	-	7e-63	-	-	7e-63	-	2e-64	17509199	100	C_ele	Caenorhabditis elegans	@Eukaryota@Metazoa	6239	;cellular organisms;Eukaryota;Opisthokonta;Metazoa;Eumetazoa;Bilateria;Protostomia;Ecdysozoa;Nematoda;Chromadorea;Rhabditida;Rhabditoidea;Rhabditidae;Peloderinae;Caenorhabditis;Caenorhabditis elegans;
-3.56	250	Minc14164	-	-	7e-63	-	-	7e-63	-	2e-64	17509199	100	C_ele	Caenorhabditis elegans	@Eukaryota@Metazoa	6239	;cellular organisms;Eukaryota;Opisthokonta;Metazoa;Eumetazoa;Bilateria;Protostomia;Ecdysozoa;Nematoda;Chromadorea;Rhabditida;Rhabditoidea;Rhabditidae;Peloderinae;Caenorhabditis;Caenorhabditis elegans;
-3.56	133	Minc13460	-	-	7e-06	-	-	-	7e-06	2e-07	196017722	33.66	T_adh	Trichoplax adhaerens	@Eukaryota@Metazoa	10228	;cellular organisms;Eukaryota;Opisthokonta;Metazoa;Placozoa;Trichoplax;Trichoplax adhaerens;
-3.56	250	Minc08711	-	-	7e-63	-	-	7e-63	-	2e-64	17509199	100	C_ele	Caenorhabditis elegans	@Eukaryota@Metazoa	6239	;cellular organisms;Eukaryota;Opisthokonta;Metazoa;Eumetazoa;Bilateria;Protostomia;Ecdysozoa;Nematoda;Chromadorea;Rhabditida;Rhabditoidea;Rhabditidae;Peloderinae;Caenorhabditis;Caenorhabditis elegans;
-3.56	250	Minc04344	-	-	7e-63	-	-	7e-63	-	2e-64	17509199	100	C_ele	Caenorhabditis elegans	@Eukaryota@Metazoa	6239	;cellular organisms;Eukaryota;Opisthokonta;Metazoa;Eumetazoa;Bilateria;Protostomia;Ecdysozoa;Nematoda;Chromadorea;Rhabditida;Rhabditoidea;Rhabditidae;Peloderinae;Caenorhabditis;Caenorhabditis elegans;
-3.56	250	Minc13068	-	-	7e-63	-	-	7e-63	-	2e-64	17509199	100	C_ele	Caenorhabditis elegans	@Eukaryota@Metazoa	6239	;cellular organisms;Eukaryota;Opisthokonta;Metazoa;Eumetazoa;Bilateria;Protostomia;Ecdysozoa;Nematoda;Chromadorea;Rhabditida;Rhabditoidea;Rhabditidae;Peloderinae;Caenorhabditis;Caenorhabditis elegans;
-3.62	251	Minc17164	-	3e-10	-	-	-	-	-	8e-12	321471292	24.05	D_pul	Daphnia pulex	@Eukaryota@Metazoa	6669	;cellular organisms;Eukaryota;Opisthokonta;Metazoa;Eumetazoa;Bilateria;Protostomia;Ecdysozoa;Panarthropoda;Arthropoda;Mandibulata;Pancrustacea;Crustacea;Branchiopoda;Phyllopoda;Diplostraca;Cladocera;Anomopoda;Daphniidae;Daphnia;Daphnia pulex;
-3.62	486	Minc07130	-	-	3e-33	-	-	3e-33	-	8e-35	391344963	62.38	G_occ	Galendromus occidentalis	@Eukaryota@Metazoa	34638	;cellular organisms;Eukaryota;Opisthokonta;Metazoa;Eumetazoa;Bilateria;Protostomia;Ecdysozoa;Panarthropoda;Arthropoda;Chelicerata;Arachnida;Acari;Parasitiformes;Mesostigmata;Monogynaspida;Gamasina;Phytoseioidea;Phytoseiidae;Typhlodrominae;Galendromus;Galendromus occidentalis;
-3.62	95	Minc11325	-	-	3e-07	-	-	-	3e-07	8e-09	42600943	46.58	A_gam	Anopheles gambiae	@Eukaryota@Metazoa	7165	;cellular organisms;Eukaryota;Opisthokonta;Metazoa;Eumetazoa;Bilateria;Protostomia;Ecdysozoa;Panarthropoda;Arthropoda;Mandibulata;Pancrustacea;Hexapoda;Insecta;Dicondylia;Pterygota;Neoptera;Holometabola;Diptera;Nematocera;Culicomorpha;Culicoidea;Culicidae;Anophelinae;Anopheles;Cellia;Pyretophorus;gambiae species complex;Anopheles gambiae;
-3.62	6	Minc11036	-	-	3e-08	-	-	-	-	8e-10	308486478	31.69	C_rem	Caenorhabditis remanei	@Eukaryota@Metazoa	31234	;cellular organisms;Eukaryota;Opisthokonta;Metazoa;Eumetazoa;Bilateria;Protostomia;Ecdysozoa;Nematoda;Chromadorea;Rhabditida;Rhabditoidea;Rhabditidae;Peloderinae;Caenorhabditis;Caenorhabditis remanei;
-3.69	250	Minc06113	-	-	2e-13	-	-	-	-	5e-15	332322872	90.48	A_oce	Amphiprion ocellaris	@Eukaryota@Metazoa	80972	;cellular organisms;Eukaryota;Opisthokonta;Metazoa;Eumetazoa;Bilateria;Deuterostomia;Chordata;Craniata;Vertebrata;Gnathostomata;Teleostomi;Euteleostomi;Actinopterygii;Actinopteri;Neopterygii;Teleostei;Osteoglossocephalai;Clupeocephala;Euteleosteomorpha;Neoteleostei;Eurypterygia;Ctenosquamata;Acanthomorphata;Euacanthomorphacea;Percomorphaceae;Ovalentaria;Ovalentaria incertae sedis;Pomacentridae;Am…
-3.69	252	Minc11756	-	-	4e-14	-	-	4e-14	-	1e-15	560134449	28.57	H_con	Haemonchus contortus	@Eukaryota@Metazoa	6289	;cellular organisms;Eukaryota;Opisthokonta;Metazoa;Eumetazoa;Bilateria;Protostomia;Ecdysozoa;Nematoda;Chromadorea;Rhabditida;Strongylida;Trichostrongyloidea;Haemonchidae;Haemonchinae;Haemonchus;Haemonchus contortus;
-3.69	250	Minc09008	-	-	4e-10	-	-	-	-	1e-11	157134514	57.63	A_aeg	Aedes aegypti	@Eukaryota@Metazoa	7159	;cellular organisms;Eukaryota;Opisthokonta;Metazoa;Eumetazoa;Bilateria;Protostomia;Ecdysozoa;Panarthropoda;Arthropoda;Mandibulata;Pancrustacea;Hexapoda;Insecta;Dicondylia;Pterygota;Neoptera;Holometabola;Diptera;Nematocera;Culicomorpha;Culicoidea;Culicidae;Culicinae;Aedini;Aedes;Stegomyia;Aedes aegypti;
-3.69	250	Minc15388	-	8e-08	-	-	-	-	-	2e-09	268569436	39.24	C_bri	Caenorhabditis briggsae	@Eukaryota@Metazoa	6238	;cellular organisms;Eukaryota;Opisthokonta;Metazoa;Eumetazoa;Bilateria;Protostomia;Ecdysozoa;Nematoda;Chromadorea;Rhabditida;Rhabditoidea;Rhabditidae;Peloderinae;Caenorhabditis;Caenorhabditis briggsae;
-3.69	216	Minc13110	-	8e-08	-	-	-	-	-	2e-09	78706916	39.33	D_mel	Drosophila melanogaster	@Eukaryota@Metazoa	7227	;cellular organisms;Eukaryota;Opisthokonta;Metazoa;Eumetazoa;Bilateria;Protostomia;Ecdysozoa;Panarthropoda;Arthropoda;Mandibulata;Pancrustacea;Hexapoda;Insecta;Dicondylia;Pterygota;Neoptera;Holometabola;Diptera;Brachycera;Muscomorpha;Eremoneura;Cyclorrhapha;Schizophora;Acalyptratae;Ephydroidea;Drosophilidae;Drosophilinae;Drosophilini;Drosophila;Sophophora;melanogaster group;melanogaster subgroup;…
-3.69	250	Minc06590	-	-	2e-13	-	-	-	2e-13	5e-15	402592591	50.67	W_ban	Wuchereria bancrofti	@Eukaryota@Metazoa	6293	;cellular organisms;Eukaryota;Opisthokonta;Metazoa;Eumetazoa;Bilateria;Protostomia;Ecdysozoa;Nematoda;Chromadorea;Spirurida;Filarioidea;Onchocercidae;Wuchereria;Wuchereria bancrofti;
-3.69	250	Minc01556	-	-	8e-16	-	-	-	8e-16	2e-17	597833374	68.66	A_cey	Ancylostoma ceylanicum	@Eukaryota@Metazoa	53326	;cellular organisms;Eukaryota;Opisthokonta;Metazoa;Eumetazoa;Bilateria;Protostomia;Ecdysozoa;Nematoda;Chromadorea;Rhabditida;Strongylida;Ancylostomatoidea;Ancylostomatidae;Ancylostomatinae;Ancylostoma;Ancylostoma ceylanicum;
-3.69	250	Minc13698	-	-	8e-09	-	-	8e-09	-	2e-10	260825834	26.84	B_flo	Branchiostoma floridae	@Eukaryota@Metazoa	7739	;cellular organisms;Eukaryota;Opisthokonta;Metazoa;Eumetazoa;Bilateria;Deuterostomia;Chordata;Cephalochordata;Branchiostomidae;Branchiostoma;Branchiostoma floridae;
-3.69	250	Minc09203	-	-	4e-64	-	-	-	4e-64	1e-65	339237381	65.28	T_spi	Trichinella spiralis	@Eukaryota@Metazoa	6334	;cellular organisms;Eukaryota;Opisthokonta;Metazoa;Eumetazoa;Bilateria;Protostomia;Ecdysozoa;Nematoda;Enoplea;Dorylaimia;Trichocephalida;Trichinellidae;Trichinella;Trichinella spiralis;
-3.69	250	Minc09204	-	-	4e-44	-	-	-	4e-44	1e-45	391331957	53.08	G_occ	Galendromus occidentalis	@Eukaryota@Metazoa	34638	;cellular organisms;Eukaryota;Opisthokonta;Metazoa;Eumetazoa;Bilateria;Protostomia;Ecdysozoa;Panarthropoda;Arthropoda;Chelicerata;Arachnida;Acari;Parasitiformes;Mesostigmata;Monogynaspida;Gamasina;Phytoseioidea;Phytoseiidae;Typhlodrominae;Galendromus;Galendromus occidentalis;
-3.69	141	Minc17022	-	-	4e-05	-	-	-	4e-05	1e-06	597807490	55.56	A_mex	Astyanax mexicanus	@Eukaryota@Metazoa	7994	;cellular organisms;Eukaryota;Opisthokonta;Metazoa;Eumetazoa;Bilateria;Deuterostomia;Chordata;Craniata;Vertebrata;Gnathostomata;Teleostomi;Euteleostomi;Actinopterygii;Actinopteri;Neopterygii;Teleostei;Osteoglossocephalai;Clupeocephala;Otomorpha;Ostariophysi;Otophysi;Characiphysae;Characiformes;Characoidei;Characidae;Characidae incertae sedis;Astyanax clade;Astyanax;Astyanax mexicanus;
-3.69	250	Minc03107	-	-	2e-47	-	-	-	2e-47	5e-49	321469418	25.62	D_pul	Daphnia pulex	@Eukaryota@Metazoa	6669	;cellular organisms;Eukaryota;Opisthokonta;Metazoa;Eumetazoa;Bilateria;Protostomia;Ecdysozoa;Panarthropoda;Arthropoda;Mandibulata;Pancrustacea;Crustacea;Branchiopoda;Phyllopoda;Diplostraca;Cladocera;Anomopoda;Daphniidae;Daphnia;Daphnia pulex;
-3.69	250	Minc12412b	-	-	2e-30	-	-	2e-30	-	5e-32	126031835	84.06	I_igu	Iguana iguana	@Eukaryota@Metazoa	8517	;cellular organisms;Eukaryota;Opisthokonta;Metazoa;Eumetazoa;Bilateria;Deuterostomia;Chordata;Craniata;Vertebrata;Gnathostomata;Teleostomi;Euteleostomi;Sarcopterygii;Dipnotetrapodomorpha;Tetrapoda;Amniota;Sauropsida;Sauria;Lepidosauria;Squamata;Bifurcata;Unidentata;Episquamata;Toxicofera;Iguania;Iguanidae;Iguaninae;Iguana;Iguana iguana;
-3.76	250	Minc01631	-	3e-12	-	-	-	-	-	7e-14	402591201	42.7	W_ban	Wuchereria bancrofti	@Eukaryota@Metazoa	6293	;cellular organisms;Eukaryota;Opisthokonta;Metazoa;Eumetazoa;Bilateria;Protostomia;Ecdysozoa;Nematoda;Chromadorea;Spirurida;Filarioidea;Onchocercidae;Wuchereria;Wuchereria bancrofti;
-3.81	251	Minc09062	-	-	9e-06	-	-	-	9e-06	2e-07	586480043	26.79	C_asi	Chrysochloris asiatica	@Eukaryota@Metazoa	185453	;cellular organisms;Eukaryota;Opisthokonta;Metazoa;Eumetazoa;Bilateria;Deuterostomia;Chordata;Craniata;Vertebrata;Gnathostomata;Teleostomi;Euteleostomi;Sarcopterygii;Dipnotetrapodomorpha;Tetrapoda;Amniota;Mammalia;Theria;Eutheria;Afrotheria;Chrysochloridae;Chrysochlorinae;Chrysochloris;Chrysochloris asiatica;
-3.91	250	Minc06813	-	-	1e-55	-	-	-	-	2e-57	597855211	70.63	A_cey	Ancylostoma ceylanicum	@Eukaryota@Metazoa	53326	;cellular organisms;Eukaryota;Opisthokonta;Metazoa;Eumetazoa;Bilateria;Protostomia;Ecdysozoa;Nematoda;Chromadorea;Rhabditida;Strongylida;Ancylostomatoidea;Ancylostomatidae;Ancylostomatinae;Ancylostoma;Ancylostoma ceylanicum;
-3.91	250	Minc10898	-	-	5e-07	-	-	-	5e-07	1e-08	313224235	35	O_dio	Oikopleura dioica	@Eukaryota@Metazoa	34765	;cellular organisms;Eukaryota;Opisthokonta;Metazoa;Eumetazoa;Bilateria;Deuterostomia;Chordata;Tunicata;Appendicularia;Oikopleuridae;Oikopleura;Oikopleura dioica;
-3.91	137	Minc12401	-	-	2e-05	-	-	-	2e-05	4e-07	193613146	92	A_pis	Acyrthosiphon pisum	@Eukaryota@Metazoa	7029	;cellular organisms;Eukaryota;Opisthokonta;Metazoa;Eumetazoa;Bilateria;Protostomia;Ecdysozoa;Panarthropoda;Arthropoda;Mandibulata;Pancrustacea;Hexapoda;Insecta;Dicondylia;Pterygota;Neoptera;Paraneoptera;Hemiptera;Sternorrhyncha;Aphidomorpha;Aphidoidea;Aphididae;Aphidinae;Macrosiphini;Acyrthosiphon;Acyrthosiphon pisum;
-3.91	305	Minc12975b	-	-	1e-10	-	-	-	-	2e-12	357602936	51.67	D_ple	Danaus plexippus	@Eukaryota@Metazoa	13037	;cellular organisms;Eukaryota;Opisthokonta;Metazoa;Eumetazoa;Bilateria;Protostomia;Ecdysozoa;Panarthropoda;Arthropoda;Mandibulata;Pancrustacea;Hexapoda;Insecta;Dicondylia;Pterygota;Neoptera;Holometabola;Amphiesmenoptera;Lepidoptera;Glossata;Neolepidoptera;Heteroneura;Ditrysia;Obtectomera;Papilionoidea;Nymphalidae;Danainae;Danaini;Danaina;Danaus;Danaus;Danaus plexippus;
-3.91	250	Minc09362	-	-	5e-06	-	-	-	5e-06	1e-07	269785247	28.17	S_kow	Saccoglossus kowalevskii	@Eukaryota@Metazoa	10224	;cellular organisms;Eukaryota;Opisthokonta;Metazoa;Eumetazoa;Bilateria;Deuterostomia;Hemichordata;Enteropneusta;Harrimaniidae;Saccoglossus;Saccoglossus kowalevskii;
-3.91	250	Minc18697b	-	4e-28	-	-	-	-	-	8e-30	578359006	34.32	A_jap	Apriona japonica	@Eukaryota@Metazoa	692975	;cellular organisms;Eukaryota;Opisthokonta;Metazoa;Eumetazoa;Bilateria;Protostomia;Ecdysozoa;Panarthropoda;Arthropoda;Mandibulata;Pancrustacea;Hexapoda;Insecta;Dicondylia;Pterygota;Neoptera;Holometabola;Coleoptera;Polyphaga;Cucujiformia;Chrysomeloidea;Cerambycidae;Lamiinae;Batocerini;Apriona;Apriona japonica;
-3.91	12	Minc10946	-	0.0002	-	-	-	-	-	4e-06	72000077	33.33	C_ele	Caenorhabditis elegans	@Eukaryota@Metazoa	6239	;cellular organisms;Eukaryota;Opisthokonta;Metazoa;Eumetazoa;Bilateria;Protostomia;Ecdysozoa;Nematoda;Chromadorea;Rhabditida;Rhabditoidea;Rhabditidae;Peloderinae;Caenorhabditis;Caenorhabditis elegans;
-3.91	173	Minc06836	-	-	1e-07	-	-	1e-07	-	2e-09	242004966	32.3	Pedic	Pediculus humanus corporis	@Eukaryota@Metazoa	121224	;cellular organisms;Eukaryota;Opisthokonta;Metazoa;Eumetazoa;Bilateria;Protostomia;Ecdysozoa;Panarthropoda;Arthropoda;Mandibulata;Pancrustacea;Hexapoda;Insecta;Dicondylia;Pterygota;Neoptera;Paraneoptera;Psocodea;Phthiraptera;Anoplura;Pediculidae;Pediculus;Pediculus humanus;Pediculus humanus corporis;
-3.91	145	Minc07861e	-	-	2e-06	-	-	-	-	4e-08	402588707	24.54	W_ban	Wuchereria bancrofti	@Eukaryota@Metazoa	6293	;cellular organisms;Eukaryota;Opisthokonta;Metazoa;Eumetazoa;Bilateria;Protostomia;Ecdysozoa;Nematoda;Chromadorea;Spirurida;Filarioidea;Onchocercidae;Wuchereria;Wuchereria bancrofti;
-3.91	250	Minc12087	-	-	1e-115	-	-	1e-115	-	2e-117	291242137	89.94	S_kow	Saccoglossus kowalevskii	@Eukaryota@Metazoa	10224	;cellular organisms;Eukaryota;Opisthokonta;Metazoa;Eumetazoa;Bilateria;Deuterostomia;Hemichordata;Enteropneusta;Harrimaniidae;Saccoglossus;Saccoglossus kowalevskii;
-3.91	19	Minc08123	-	5e-05	-	-	-	-	-	1e-06	341877951	28.51	C_bre	Caenorhabditis brenneri	@Eukaryota@Metazoa	135651	;cellular organisms;Eukaryota;Opisthokonta;Metazoa;Eumetazoa;Bilateria;Protostomia;Ecdysozoa;Nematoda;Chromadorea;Rhabditida;Rhabditoidea;Rhabditidae;Peloderinae;Caenorhabditis;Caenorhabditis brenneri;
-3.91	250	Minc10402	-	-	4e-06	-	-	-	4e-06	8e-08	530589509	25.28	Chrys	Chrysemys picta bellii	@Eukaryota@Metazoa	8478	;cellular organisms;Eukaryota;Opisthokonta;Metazoa;Eumetazoa;Bilateria;Deuterostomia;Chordata;Craniata;Vertebrata;Gnathostomata;Teleostomi;Euteleostomi;Sarcopterygii;Dipnotetrapodomorpha;Tetrapoda;Amniota;Sauropsida;Sauria;Archelosauria;Testudines;Cryptodira;Durocryptodira;Testudinoidea;Emydidae;Chrysemys;Chrysemys picta;Chrysemys picta bellii;
-3.91	250	Minc17009	-	-	1e-08	-	-	-	1e-08	2e-10	46394468	32.11	P_pac	Pristionchus pacificus	@Eukaryota@Metazoa	54126	;cellular organisms;Eukaryota;Opisthokonta;Metazoa;Eumetazoa;Bilateria;Protostomia;Ecdysozoa;Nematoda;Chromadorea;Diplogasterida;Neodiplogasteridae;Pristionchus;Pristionchus pacificus;
-3.91	250	Minc11885	-	-	1e-12	-	-	-	1e-12	2e-14	198430529	41.67	C_int	Ciona intestinalis	@Eukaryota@Metazoa	7719	;cellular organisms;Eukaryota;Opisthokonta;Metazoa;Eumetazoa;Bilateria;Deuterostomia;Chordata;Tunicata;Ascidiacea;Enterogona;Phlebobranchia;Cionidae;Ciona;Ciona intestinalis;
-3.91	13	Minc12474c	-	-	5e-06	-	-	5e-06	-	1e-07	393909190	48.28	L_loa	Loa loa	@Eukaryota@Metazoa	7209	;cellular organisms;Eukaryota;Opisthokonta;Metazoa;Eumetazoa;Bilateria;Protostomia;Ecdysozoa;Nematoda;Chromadorea;Spirurida;Filarioidea;Onchocercidae;Loa;Loa loa;
-3.91	250	Minc13245	-	-	4e-20	-	-	-	4e-20	8e-22	444720606	36.48	T_chi	Tupaia chinensis	@Eukaryota@Metazoa	246437	;cellular organisms;Eukaryota;Opisthokonta;Metazoa;Eumetazoa;Bilateria;Deuterostomia;Chordata;Craniata;Vertebrata;Gnathostomata;Teleostomi;Euteleostomi;Sarcopterygii;Dipnotetrapodomorpha;Tetrapoda;Amniota;Mammalia;Theria;Eutheria;Boreoeutheria;Euarchontoglires;Scandentia;Tupaiidae;Tupaia;Tupaia chinensis;
-3.91	250	Minc03361	-	-	5e-56	-	-	-	-	1e-57	597855211	70.63	A_cey	Ancylostoma ceylanicum	@Eukaryota@Metazoa	53326	;cellular organisms;Eukaryota;Opisthokonta;Metazoa;Eumetazoa;Bilateria;Protostomia;Ecdysozoa;Nematoda;Chromadorea;Rhabditida;Strongylida;Ancylostomatoidea;Ancylostomatidae;Ancylostomatinae;Ancylostoma;Ancylostoma ceylanicum;
-3.91	250	Minc15487	-	-	3e-14	-	-	-	-	6e-16	459182593	42.86	C_int	Ciona intestinalis	@Eukaryota@Metazoa	7719	;cellular organisms;Eukaryota;Opisthokonta;Metazoa;Eumetazoa;Bilateria;Deuterostomia;Chordata;Tunicata;Ascidiacea;Enterogona;Phlebobranchia;Cionidae;Ciona;Ciona intestinalis;
-4.05	26	Minc17210	-	-	-	-	4e-06	-	-	7e-08	541042271	29.52	A_suu	Ascaris suum	@Eukaryota@Metazoa	6253	;cellular organisms;Eukaryota;Opisthokonta;Metazoa;Eumetazoa;Bilateria;Protostomia;Ecdysozoa;Nematoda;Chromadorea;Ascaridida;Ascaridoidea;Ascarididae;Ascaris;Ascaris suum;
-4.09	250	Minc14822	-	3e-11	-	-	-	-	-	5e-13	393910523	46.67	L_loa	Loa loa	@Eukaryota@Metazoa	7209	;cellular organisms;Eukaryota;Opisthokonta;Metazoa;Eumetazoa;Bilateria;Protostomia;Ecdysozoa;Nematoda;Chromadorea;Spirurida;Filarioidea;Onchocercidae;Loa;Loa loa;
-4.09	153	Minc17721	-	-	0.0003	-	-	-	0.0003	5e-06	313224233	27.7	O_dio	Oikopleura dioica	@Eukaryota@Metazoa	34765	;cellular organisms;Eukaryota;Opisthokonta;Metazoa;Eumetazoa;Bilateria;Deuterostomia;Chordata;Tunicata;Appendicularia;Oikopleuridae;Oikopleura;Oikopleura dioica;
-4.09	250	Minc16631	-	-	3e-12	-	-	3e-12	-	5e-14	91078764	41.18	T_cas	Tribolium castaneum	@Eukaryota@Metazoa	7070	;cellular organisms;Eukaryota;Opisthokonta;Metazoa;Eumetazoa;Bilateria;Protostomia;Ecdysozoa;Panarthropoda;Arthropoda;Mandibulata;Pancrustacea;Hexapoda;Insecta;Dicondylia;Pterygota;Neoptera;Holometabola;Coleoptera;Polyphaga;Cucujiformia;Tenebrionoidea;Tenebrionidae;Tenebrionidae incertae sedis;Tribolium;Tribolium castaneum;
-4.14	129	Minc07281	-	-	5e-08	-	-	5e-08	-	8e-10	641654652	29.03	A_pis	Acyrthosiphon pisum	@Eukaryota@Metazoa	7029	;cellular organisms;Eukaryota;Opisthokonta;Metazoa;Eumetazoa;Bilateria;Protostomia;Ecdysozoa;Panarthropoda;Arthropoda;Mandibulata;Pancrustacea;Hexapoda;Insecta;Dicondylia;Pterygota;Neoptera;Paraneoptera;Hemiptera;Sternorrhyncha;Aphidomorpha;Aphidoidea;Aphididae;Aphidinae;Macrosiphini;Acyrthosiphon;Acyrthosiphon pisum;
-4.2	29	Minc16975a	-	-	2e-06	-	-	-	-	3e-08	568268420	26.92	N_ame	Necator americanus	@Eukaryota@Metazoa	51031	;cellular organisms;Eukaryota;Opisthokonta;Metazoa;Eumetazoa;Bilateria;Protostomia;Ecdysozoa;Nematoda;Chromadorea;Rhabditida;Strongylida;Ancylostomatoidea;Ancylostomatidae;Bunostominae;Necator;Necator americanus;
-4.2	83	Minc10897	-	-	2e-07	-	-	2e-07	-	3e-09	541048319	31.79	A_suu	Ascaris suum	@Eukaryota@Metazoa	6253	;cellular organisms;Eukaryota;Opisthokonta;Metazoa;Eumetazoa;Bilateria;Protostomia;Ecdysozoa;Nematoda;Chromadorea;Ascaridida;Ascaridoidea;Ascarididae;Ascaris;Ascaris suum;
-4.2	250	Minc11223	-	-	2e-53	-	-	-	-	3e-55	585160831	64.34	L_wed	Leptonychotes weddellii	@Eukaryota@Metazoa	9713	;cellular organisms;Eukaryota;Opisthokonta;Metazoa;Eumetazoa;Bilateria;Deuterostomia;Chordata;Craniata;Vertebrata;Gnathostomata;Teleostomi;Euteleostomi;Sarcopterygii;Dipnotetrapodomorpha;Tetrapoda;Amniota;Mammalia;Theria;Eutheria;Boreoeutheria;Laurasiatheria;Carnivora;Caniformia;Phocidae;Leptonychotes;Leptonychotes weddellii;
-4.2	77	Minc12196	-	-	2e-14	-	-	-	2e-14	3e-16	443700903	31.46	C_tel	Capitella teleta	@Eukaryota@Metazoa	283909	;cellular organisms;Eukaryota;Opisthokonta;Metazoa;Eumetazoa;Bilateria;Protostomia;Lophotrochozoa;Annelida;Polychaeta;Scolecida;Capitellida;Capitellidae;Capitella;Capitella teleta;
-4.2	91	Minc17229	-	2e-09	-	-	-	-	-	3e-11	341895927	24.68	C_bre	Caenorhabditis brenneri	@Eukaryota@Metazoa	135651	;cellular organisms;Eukaryota;Opisthokonta;Metazoa;Eumetazoa;Bilateria;Protostomia;Ecdysozoa;Nematoda;Chromadorea;Rhabditida;Rhabditoidea;Rhabditidae;Peloderinae;Caenorhabditis;Caenorhabditis brenneri;
-4.2	250	Minc05296	-	-	6e-10	-	-	-	-	9e-12	157134514	57.63	A_aeg	Aedes aegypti	@Eukaryota@Metazoa	7159	;cellular organisms;Eukaryota;Opisthokonta;Metazoa;Eumetazoa;Bilateria;Protostomia;Ecdysozoa;Panarthropoda;Arthropoda;Mandibulata;Pancrustacea;Hexapoda;Insecta;Dicondylia;Pterygota;Neoptera;Holometabola;Diptera;Nematocera;Culicomorpha;Culicoidea;Culicidae;Culicinae;Aedini;Aedes;Stegomyia;Aedes aegypti;
-4.2	69	Minc16578	-	-	2e-11	-	-	-	2e-11	3e-13	391348333	27.27	G_occ	Galendromus occidentalis	@Eukaryota@Metazoa	34638	;cellular organisms;Eukaryota;Opisthokonta;Metazoa;Eumetazoa;Bilateria;Protostomia;Ecdysozoa;Panarthropoda;Arthropoda;Chelicerata;Arachnida;Acari;Parasitiformes;Mesostigmata;Monogynaspida;Gamasina;Phytoseioidea;Phytoseiidae;Typhlodrominae;Galendromus;Galendromus occidentalis;
-4.2	250	Minc16262	-	-	2e-69	-	-	-	-	3e-71	391331957	68.71	G_occ	Galendromus occidentalis	@Eukaryota@Metazoa	34638	;cellular organisms;Eukaryota;Opisthokonta;Metazoa;Eumetazoa;Bilateria;Protostomia;Ecdysozoa;Panarthropoda;Arthropoda;Chelicerata;Arachnida;Acari;Parasitiformes;Mesostigmata;Monogynaspida;Gamasina;Phytoseioidea;Phytoseiidae;Typhlodrominae;Galendromus;Galendromus occidentalis;
-4.2	250	Minc09946	-	-	2e-94	-	-	-	-	3e-96	4502211	76.88	H_sap	Homo sapiens	@Eukaryota@Metazoa	9606	;cellular organisms;Eukaryota;Opisthokonta;Metazoa;Eumetazoa;Bilateria;Deuterostomia;Chordata;Craniata;Vertebrata;Gnathostomata;Teleostomi;Euteleostomi;Sarcopterygii;Dipnotetrapodomorpha;Tetrapoda;Amniota;Mammalia;Theria;Eutheria;Boreoeutheria;Euarchontoglires;Primates;Haplorrhini;Simiiformes;Catarrhini;Hominoidea;Hominidae;Homininae;Homo;Homo sapiens;
-4.2	250	Minc07050	-	-	2e-07	-	-	-	2e-07	3e-09	313224233	23.11	O_dio	Oikopleura dioica	@Eukaryota@Metazoa	34765	;cellular organisms;Eukaryota;Opisthokonta;Metazoa;Eumetazoa;Bilateria;Deuterostomia;Chordata;Tunicata;Appendicularia;Oikopleuridae;Oikopleura;Oikopleura dioica;
-4.25	74	Minc11467	-	-	7e-05	-	-	-	7e-05	1e-06	466070873	28.06	O_orc	Orcinus orca	@Eukaryota@Metazoa	9733	;cellular organisms;Eukaryota;Opisthokonta;Metazoa;Eumetazoa;Bilateria;Deuterostomia;Chordata;Craniata;Vertebrata;Gnathostomata;Teleostomi;Euteleostomi;Sarcopterygii;Dipnotetrapodomorpha;Tetrapoda;Amniota;Mammalia;Theria;Eutheria;Boreoeutheria;Laurasiatheria;Cetartiodactyla;Cetacea;Odontoceti;Delphinidae;Orcinus;Orcinus orca;
-4.27	250	Minc00899	-	-	5e-11	-	-	5e-11	-	7e-13	560996084	75	V_pac	Vicugna pacos	@Eukaryota@Metazoa	30538	;cellular organisms;Eukaryota;Opisthokonta;Metazoa;Eumetazoa;Bilateria;Deuterostomia;Chordata;Craniata;Vertebrata;Gnathostomata;Teleostomi;Euteleostomi;Sarcopterygii;Dipnotetrapodomorpha;Tetrapoda;Amniota;Mammalia;Theria;Eutheria;Boreoeutheria;Laurasiatheria;Cetartiodactyla;Tylopoda;Camelidae;Vicugna;Vicugna pacos;
-4.32	260	Minc07727	-	-	-	-	3e-14	-	-	4e-16	443729063	29.17	C_tel	Capitella teleta	@Eukaryota@Metazoa	283909	;cellular organisms;Eukaryota;Opisthokonta;Metazoa;Eumetazoa;Bilateria;Protostomia;Lophotrochozoa;Annelida;Polychaeta;Scolecida;Capitellida;Capitellidae;Capitella;Capitella teleta;
-4.32	250	Minc17701	-	-	3e-05	-	-	3e-05	-	4e-07	312069661	57.78	L_loa	Loa loa	@Eukaryota@Metazoa	7209	;cellular organisms;Eukaryota;Opisthokonta;Metazoa;Eumetazoa;Bilateria;Protostomia;Ecdysozoa;Nematoda;Chromadorea;Spirurida;Filarioidea;Onchocercidae;Loa;Loa loa;
-4.32	139	Minc05263	-	-	6e-14	-	-	-	6e-14	8e-16	157120575	24.68	A_aeg	Aedes aegypti	@Eukaryota@Metazoa	7159	;cellular organisms;Eukaryota;Opisthokonta;Metazoa;Eumetazoa;Bilateria;Protostomia;Ecdysozoa;Panarthropoda;Arthropoda;Mandibulata;Pancrustacea;Hexapoda;Insecta;Dicondylia;Pterygota;Neoptera;Holometabola;Diptera;Nematocera;Culicomorpha;Culicoidea;Culicidae;Culicinae;Aedini;Aedes;Stegomyia;Aedes aegypti;
-4.32	19	Minc12490	-	-	3e-06	-	-	-	3e-06	4e-08	313224233	24.02	O_dio	Oikopleura dioica	@Eukaryota@Metazoa	34765	;cellular organisms;Eukaryota;Opisthokonta;Metazoa;Eumetazoa;Bilateria;Deuterostomia;Chordata;Tunicata;Appendicularia;Oikopleuridae;Oikopleura;Oikopleura dioica;
-4.32	126	Minc07108	-	-	3e-16	-	-	-	3e-16	4e-18	157106877	24.81	A_aeg	Aedes aegypti	@Eukaryota@Metazoa	7159	;cellular organisms;Eukaryota;Opisthokonta;Metazoa;Eumetazoa;Bilateria;Protostomia;Ecdysozoa;Panarthropoda;Arthropoda;Mandibulata;Pancrustacea;Hexapoda;Insecta;Dicondylia;Pterygota;Neoptera;Holometabola;Diptera;Nematocera;Culicomorpha;Culicoidea;Culicidae;Culicinae;Aedini;Aedes;Stegomyia;Aedes aegypti;
-4.32	504	Minc10006b	-	-	3e-154	-	-	3e-154	-	4e-156	568290445	97.82	N_ame	Necator americanus	@Eukaryota@Metazoa	51031	;cellular organisms;Eukaryota;Opisthokonta;Metazoa;Eumetazoa;Bilateria;Protostomia;Ecdysozoa;Nematoda;Chromadorea;Rhabditida;Strongylida;Ancylostomatoidea;Ancylostomatidae;Bunostominae;Necator;Necator americanus;
-4.32	251	Minc08752	-	-	3e-25	-	-	-	-	4e-27	597874603	28.28	A_cey	Ancylostoma ceylanicum	@Eukaryota@Metazoa	53326	;cellular organisms;Eukaryota;Opisthokonta;Metazoa;Eumetazoa;Bilateria;Protostomia;Ecdysozoa;Nematoda;Chromadorea;Rhabditida;Strongylida;Ancylostomatoidea;Ancylostomatidae;Ancylostomatinae;Ancylostoma;Ancylostoma ceylanicum;
-4.32	273	Minc03093	-	-	-	-	6e-15	-	-	8e-17	357602859	34.32	D_ple	Danaus plexippus	@Eukaryota@Metazoa	13037	;cellular organisms;Eukaryota;Opisthokonta;Metazoa;Eumetazoa;Bilateria;Protostomia;Ecdysozoa;Panarthropoda;Arthropoda;Mandibulata;Pancrustacea;Hexapoda;Insecta;Dicondylia;Pterygota;Neoptera;Holometabola;Amphiesmenoptera;Lepidoptera;Glossata;Neolepidoptera;Heteroneura;Ditrysia;Obtectomera;Papilionoidea;Nymphalidae;Danainae;Danaini;Danaina;Danaus;Danaus;Danaus plexippus;
-4.32	250	Minc16749	-	-	3e-21	-	-	3e-21	-	4e-23	312078822	70.77	L_loa	Loa loa	@Eukaryota@Metazoa	7209	;cellular organisms;Eukaryota;Opisthokonta;Metazoa;Eumetazoa;Bilateria;Protostomia;Ecdysozoa;Nematoda;Chromadorea;Spirurida;Filarioidea;Onchocercidae;Loa;Loa loa;
-4.35	82	Minc05963	-	-	7e-07	-	-	7e-07	-	9e-09	443694150	31.79	C_tel	Capitella teleta	@Eukaryota@Metazoa	283909	;cellular organisms;Eukaryota;Opisthokonta;Metazoa;Eumetazoa;Bilateria;Protostomia;Lophotrochozoa;Annelida;Polychaeta;Scolecida;Capitellida;Capitellidae;Capitella;Capitella teleta;
-4.38	138	Minc09442	-	-	4e-09	-	-	-	4e-09	5e-11	308451671	53.7	C_rem	Caenorhabditis remanei	@Eukaryota@Metazoa	31234	;cellular organisms;Eukaryota;Opisthokonta;Metazoa;Eumetazoa;Bilateria;Protostomia;Ecdysozoa;Nematoda;Chromadorea;Rhabditida;Rhabditoidea;Rhabditidae;Peloderinae;Caenorhabditis;Caenorhabditis remanei;
-4.38	138	Minc09445	-	-	4e-09	-	-	-	4e-09	5e-11	308451671	53.7	C_rem	Caenorhabditis remanei	@Eukaryota@Metazoa	31234	;cellular organisms;Eukaryota;Opisthokonta;Metazoa;Eumetazoa;Bilateria;Protostomia;Ecdysozoa;Nematoda;Chromadorea;Rhabditida;Rhabditoidea;Rhabditidae;Peloderinae;Caenorhabditis;Caenorhabditis remanei;
-4.42	250	Minc10985	-	-	5e-11	-	-	-	5e-11	6e-13	45383602	42.17	G_gal	Gallus gallus	@Eukaryota@Metazoa	9031	;cellular organisms;Eukaryota;Opisthokonta;Metazoa;Eumetazoa;Bilateria;Deuterostomia;Chordata;Craniata;Vertebrata;Gnathostomata;Teleostomi;Euteleostomi;Sarcopterygii;Dipnotetrapodomorpha;Tetrapoda;Amniota;Sauropsida;Sauria;Archelosauria;Archosauria;Dinosauria;Saurischia;Theropoda;Coelurosauria;Aves;Neognathae;Galloanserae;Galliformes;Phasianidae;Phasianinae;Gallus;Gallus gallus;
-4.47	251	Minc02701	-	-	7e-11	-	-	7e-11	-	8e-13	156351416	32.26	N_vec	Nematostella vectensis	@Eukaryota@Metazoa	45351	;cellular organisms;Eukaryota;Opisthokonta;Metazoa;Eumetazoa;Cnidaria;Anthozoa;Hexacorallia;Actiniaria;Edwardsiidae;Nematostella;Nematostella vectensis;
-4.49	228	Minc07331	-	8e-08	-	-	-	-	-	9e-10	560126332	34.04	H_con	Haemonchus contortus	@Eukaryota@Metazoa	6289	;cellular organisms;Eukaryota;Opisthokonta;Metazoa;Eumetazoa;Bilateria;Protostomia;Ecdysozoa;Nematoda;Chromadorea;Rhabditida;Strongylida;Trichostrongyloidea;Haemonchidae;Haemonchinae;Haemonchus;Haemonchus contortus;
-4.5	150	Minc05262	-	-	9e-15	-	-	-	9e-15	1e-16	641663583	23.94	A_pis	Acyrthosiphon pisum	@Eukaryota@Metazoa	7029	;cellular organisms;Eukaryota;Opisthokonta;Metazoa;Eumetazoa;Bilateria;Protostomia;Ecdysozoa;Panarthropoda;Arthropoda;Mandibulata;Pancrustacea;Hexapoda;Insecta;Dicondylia;Pterygota;Neoptera;Paraneoptera;Hemiptera;Sternorrhyncha;Aphidomorpha;Aphidoidea;Aphididae;Aphidinae;Macrosiphini;Acyrthosiphon;Acyrthosiphon pisum;
-4.5	254	Minc05640	-	-	9e-60	-	-	-	-	1e-61	597837417	38.35	A_cey	Ancylostoma ceylanicum	@Eukaryota@Metazoa	53326	;cellular organisms;Eukaryota;Opisthokonta;Metazoa;Eumetazoa;Bilateria;Protostomia;Ecdysozoa;Nematoda;Chromadorea;Rhabditida;Strongylida;Ancylostomatoidea;Ancylostomatidae;Ancylostomatinae;Ancylostoma;Ancylostoma ceylanicum;
-4.61	251	Minc07939	-	-	1e-19	-	-	1e-19	-	1e-21	560134449	26.42	H_con	Haemonchus contortus	@Eukaryota@Metazoa	6289	;cellular organisms;Eukaryota;Opisthokonta;Metazoa;Eumetazoa;Bilateria;Protostomia;Ecdysozoa;Nematoda;Chromadorea;Rhabditida;Strongylida;Trichostrongyloidea;Haemonchidae;Haemonchinae;Haemonchus;Haemonchus contortus;
[truncated: 11,705 more rows]
