# Supplementary material for: Alienness: Rapid Detection of Candidate Horizontal Gene Transfers across the Tree of Life
Source: Preprints.org preprint supplement (doi:10.20944/preprints201708.0107.v1), 2017-08-31
Supplement: Supplementary file 7 [file Supp-Table2-AI-Tree-MiV1.xlsx]

## Sheet: Feuil1
Accession Number	Exons	Pfam	GO/ Process	Goslim/ Process	GO/ Function	Goslim / Process	GO/ Component	Family	Substrate / activity	Phylo Support	Candidate donor	Taxonomy	Tax short	AI
Minc18650	4	Glyco_hydro_30	lysosome organization, sphingolipid metabolic process		glucosylceramidase activity	hydrolase activity	lysosome	GH30 xylanase	Hemicellulose, xylan	A + B	XANTHOMONAS CAMPESTRIS, XANTHOMONAS ORYZAE, XANTHOMONAS ORYZAE, XANTHOMONAS CAMPESTRIS, XANTHOMONAS AXONOPODIS, CELLVIBRIO JAPONICUS, ERWINIA CHRYSANTHEMI, DICKEYA DADANTII	BACTERIA: GAMMAPROTEOBACTERIA	BACTERIA	250.982
Minc09178	2	Glyco_hydro_30	lysosome organization,sphingolipid metabolic process		glucosylceramidase activity	hydrolase activity	lysosome	GH30 xylanase	Hemicellulose, xylan	A + B	CATENULISPORA ACIDIPHILA, CELLULOSILYTICUM RUMINICOLA, AEROMONAS PUNCTATA, CLOSTRIDIUM THERMOCELLUM, GEOBACILLUS SP, CLOSTRIDIUM PAPYROSOLVENS, CLOSTRIDIUM CELLULOLYTICUM, BACILLUS SUBTILIS, BACILLUS PUMILUS, BACILLUS AMYLOLIQUEFACIENS, CLOSTRIDIUM ACETOBUTYLICUM, STREPTOMYCES SCABIEI, STREPTOMYCES SVICEUS	BACTERIA: FIRMICUTES, CLOSTRIDIALES, GAMMAPROTEOBACTERIA, ACTINOMYCETALES	BACTERIA	201.934
Minc10639	5	Glyco_hydro_43	carbohydrate metabolic process	carbohydrate metabolic process	hydrolase activity, hydrolyzing O-glycosyl compounds	hydrolase activity		GH43 candidate arabinase	Arabinan, arabinose	A + B	COPRINOPSIS CINEREA, VERTICILLIUM ALBO-ATRUM, GIBBERELLA ZEAE, NECTRIA HAEMATOCOCCA, CHAETOMIUM GLOBOSUM, STREPTOMYCES COELICOLOR, STREPTOMYCES GRISEOFLAVUS, STREPTOMYCES SVICEUS, STREPTOMYCES GHANAENSIS, STREPTOMYCES FLAVOGRISEUS, STREPTOMYCES HYGROSCOPICUS, THERMOMONOSPORA CURVATA, NOCARDIOPSIS DASSONVILLEI, MICROMONOSPORA AURANTIACA, ACTINOSYNNEMA MIRUM	FUNGI: DIKARYA | BACTERIA: ACTINOMYCETALES	BACTERIA + FUNGI	69.0776
Minc10889	3							GH*_gha		A + B	XANTHOBACTER AUTOTROPHICUS, AZORHIZOBIUM CAULINODANS	BACTERIA: RHIZOBIALES (ALPHAPROTEOBACTERIA)	BACTERIA	50.6569
Minc14296	2	DUF1772								A + B	DESULFOVIBRIO MAGNETICUS, DESULFOVIBRIO SP, HYPHOMICROBIUM DENITRIFICANS, AZORHIZOBIUM CAULINODANS, XANTHOBACTER AUTOTROPHICUS, METHYLOBACTERIUM NODULANS, METHYLOBACTERIUM EXTORQUEN, METHYLOBACTERIUM CHLOROMETHANICUM, METHYLOBACTERIUM POPULI, SINORHIZOBIUM MEDICAE, SINORHIZOBIUM MELILOTI, RHIZOBIUM SP	BACTERIA: RHIZOBIALES, DELTAPROTEOBACTERIA	BACTERIA	49.7406
Minc04192a	6									A + B	RHIZOBIUM LEGUMINOSARUM, RHIZOBIUM ETLI, AGROBACTERIUM RADIOBACTER, AGROBACTERIUM VITIS, AGROBACTERIUM TUMEFACIENS, SINORHIZOBIUM MELILOTI, SINORHIZOBIUM MEDICAE, RHIZOBIUM SP, HOEFLEA PHOTOTROPHICA, CHELATIVORANS, MESORHIZOBIUM LOTI, MESORHIZOBIUM OPPORTUNISTUM, OCHROBACTRUM INTERMEDIUM, BRUCELLA MELITENSIS, BRUCELLA CETI, BRUCELLA SP, BRUCELLA SUIS, BRUCELLA MELITENSIS, BRUCELLA OVIS, BRUCELLA …	BACTERIA: RHIZOBIALES	BACTERIA	48.3543
Minc14782	3	DUF1772								A + B	METHYLOBACTERIUM NODULANS, METHYLOBACTERIUM POPULI, SINORHIZOBIUM MELILOTI, SINORHIZOBIUM MEDICAE, RHIZOBIUM SP, HYPHOMICROBIUM DENITRIFICANS, METHYLOBACTERIUM EXTORQUENS, METHYLOBACTERIUM EXTORQUENS, METHYLOBACTERIUM CHLOROMETHANICUM, METHYLOBACTERIUM EXTORQUENS, XANTHOBACTER AUTOTROPHICUS, AZORHIZOBIUM CAULINODANS, DESULFOVIBRIO MAGNETICUS, DESULFOVIBRIO SP	BACTERIA: RHIZOBIALES, DELTAPROTEOBACTERIA	BACTERIA	43.7491
Minc16424	3							Concanavalin A-like lectin/glucanase;		A + B	BURKHOLDERIA CENOCEPACIA, BURKHOLDERIA CENOCEPACIA, RALSTONIA SOLANACEARUM, BURKHOLDERIA AMBIFARIA, BURKHOLDERIA UBONENSIS, BURKHOLDERIA AMBIFARIA, BURKHOLDERIA SP, AGROBACTERIUM RADIOBACTER, VARIOVORAX PARADOXUS	BACTERIA: BURKHOLDERIALES (BETAPROTEOBACTERIA), RHIZOBIALES (ALPHAPROTEOBACTERIA)	BACTERIA	42.3628
Minc09678b	2									A + B	OCHROBACTRUM INTERMEDIUM, OCHROBACTRUM ANTHROPI, BRUCELLA CETI, BRUCELLA ABORTUS, BRUCELLA SUIS, BRUCELLA SP, BRUCELLA OVIS, BRUCELLA ABORTUS, BRUCELLA MELITENSIS	BACTERIA: ALPHAPROTEOBACTERIA (BRUCELLACEAE)	BACTERIA	26.2447
Minc09513	3	BATS	cofactor metabolic process		iron-sulfur cluster binding			Vitamin B7, biotin BioB		A + B	RICKETTSIA FELIS, RICKETTSIA ENDOSYMBIONT OF IXODES SCAPULARIS	BACTERIA: ALPHAPROTEOBACTERIA	BACTERIA	24.6353
Minc13314	6	DAO			oxidoreductase activity	catalytic activity				A	PHYTOPHTHORA INFESTANS	PROTIST: OOMYCETE	PROTIST	24.4121
Minc01278	3									A	RICKETTSIA FELIS	BACTERIA: ALPHAPROTEOBACTERIA	BACTERIA	22.3327
Minc09268	3									A + B	PLANCTOMYCES MARIS, PSEUDOMONAS SYRINGAE	BACTERIA: PLANCTOMYCETES, GAMMAPROTEOBACTERIA	BACTERIA	21.0799
Minc02581	8									A	PARAMECIUM TETRAURELIA, ARABIDOPSIS THALIANA	PROTIST: CILIOPHORA | VIRIDIPLANTAE: STREPTOPHYTA	PROTIST | PLANT	20.0301
Minc03761	5									A	TETRAHYMENA THERMOPHILA, PICEA SITCHENSIS	PROTIST: CILIOPHORA | VIRIDIPLANTAE: STREPTOPHYTA	PROTIST | PLANT	19.6247
Minc17268	2							PL*_PL3	Pectin	A	STREPTOMYCES SP	BACTERIA: ACTINOBACTERIA	BACTERIA	19.1138
Minc14603	3	Vitamin B5- Pantoate_ligase	pantothenate biosynthetic process		pantoate-beta-alanine ligase activity	catalytic activity		Vitamin B5 pantothenate		A + B	ARCOBACTER BUTZLERI, NAUTILIA PROFUNDICOLA, CAMINIBACTER MEDIATLANTICUS	BACTERIA: EPSILONPROTEOBACTERIA	BACTERIA	16.5236
Minc00379	2	Pectate_lyase			pectate lyase activity	catalytic activity	extracellular region	PL3 pectate lyase	Pectin	A	FRANKIA SP, STREPTOMYCES HYGROSCOPICUS, STREPTOMYCES VIRIDOCHROMOGENES, STREPTOMYCES GHANAENSIS, STREPTOMYCES, GRISEOFLAVUS, STREPTOMYCES SCABIEI	BACTERIA: ACTINOMYCETALES	BACTERIA	16.1181
Minc00808	6									A	VITIS VINIFERA	VIRIDIPLANTAE: STREPTOPHYTA	PLANT	15.4249
Minc11352	4	Cellulase	carbohydrate metabolic process	carbohydrate metabolic process	hydrolase activity, hydrolyzing O-glycosyl compounds	hydrolase activity		GH5 cellulase	Cellulose	No	N /A	N /A	N /A	13.8155
Minc13280	4	NTP_transf_2			nucleotidyltransferase activity					No	N /A	N /A	N /A	13.8155
Minc02319	3									A	CHLAMYDOMONAS REINHARDTII	VIRIDIPLANTAE: CHLOROPHYTA	PLANT	12.4292
Minc09512	5	Radical_SAM			catalytic activity, iron-sulfur cluster binding	catalytic activity		Vitamin B7, biotin BioB		A + B	NEORICKETTSIA RISTICII, NEORICKETTSIA SENNETSU	BACTERIA: ALPHAPROTEOBACTERIA	BACTERIA	12.3239
Minc02729	2	DUF889								No	N /A	N /A	N /A	12.2061
Minc07193	13	Lon_C	proteolysis	protein metabolic process	ATP-dependent peptidase activity, serine-type endopeptidase activity	peptidase activity				No	N /A	N /A	N /A	12.2061
Minc09888	4							GH*_GH25		A + B	TETRAHYMENA THERMOPHILA	PROTIST: CILIOPHORA	PROTIST	11.9184
Minc18364	6	Homeobox	regulation of transcription, DNA-dependent		sequence-specific DNA binding, sequence-specific DNA binding transcription factor activity					A	ORYZA SATIVA INDICA GROUP, ORYZA SATIVA JAPONICA GROUP	VIRIDIPLANTAE: STREPTOPHYTA	PLANT	10.4143
Minc13832	9									A	TRICHOMONAS VAGINALIS, MYCOPLASMA CAPRICOLUM, PETROTOGA MOBILIS	BACTERIA: THERMOTOGALES, TENERICUTES | PROTIST: TRICHOMONADIDA	BACTERIA | PROTIST	9.90349
Minc06015	8	Cyanate_lyase	cyanate metabolic process		cyanate hydratase activity	catalytic activity		Cyanate Lyase	Detoxification / Modulation of plant defense ?	A + B	METHYLACIDIPHILUM INFERNORUM	BACTERIA: VERRUCOMICROBIA	BACTERIA	9.90349
Minc13286	8	Pkinase	protein amino acid phosphorylation	protein modification process	ATP binding, protein kinase activity	protein kinase activity | nucleotide binding				A	PLASMODIUM FALCIPARUM, THEILERIA ANNULATA	PROTIST: APICOMPLEXA, ALVEOLATA	PROTIST	9.43348
Minc11251	4									No	N /A	N /A	N /A	9.43348
Minc06923	3	SPRY								A	ENTAMOEBA DISPAR, ENTAMOEBA HISTOLYTICA	PROTIST: AMOEBOZOA	PROTIST	9.21034
Minc15345	2	DUF1768								No	N /A	N /A	N /A	8.41183
Minc00058	2	zf-CCHC			nucleic acid binding,zinc ion binding					A	TETRAHYMENA THERMOPHILA	PROTIST: CILIOPHORA	PROTIST	7.82405
Minc12831	1	Lon_C	proteolysis	protein metabolic process	ATP-dependent peptidase activity, serine-type endopeptidase activity	peptidase activity				A	THERMOTOGA MARITIMA, MARINITOGA PIEZOPHILA, THERMOTOGA PETROPHILA, THERMOTOGA SP, THERMOSIPHO MELANESIENSIS, GEOBACTER SULFURREDUCENS, GEOBACTER METALLIREDUCENS, THERMODESULFOVIBRIO YELLOWSTONII, CANDIDATUS KUENENIA, STUTTGARTIENSIS MYXOCOCCUS XANTHUS, VERRUCOMICROBIUM SPINOSUM, KOSMOTOGA OLEARIA, RUMINOCOCCUS TORQUES, ROSEBURIA INTESTINALIS, HALOTHERMOTHRIX ORENII, THERMOSINUS CARBOXYDIVORANS, A…	BACTERIA: PLANCTOMYCETES, BACTEROIDETES, FIRMICUTES, THERMOTOGALES, VERRUCOMICROBIA, DELTAPROTEOBACTERIA | FUNGI: DIKARYA	BACTERIA | FUNGI	7.1309
Minc14976	1	GTP_EFTU			GTP binding, GTPase activity	nucleotide binding | hydrolase activity				A	PLASMODIUM KNOWLESI	PROTIST: APICOMPLEXA	PROTIST	6.21461
Minc15116	4	zf-C3HC4								No	N /A	N /A	N /A	5.40368
Minc07485	2	Sugar_tr	transmembrane transport, transport		transporter activity		integral to membrane			A	PHYTOPHTHORA INFESTANS	PROTIST: OOMYCETE	PROTIST	5.29832
Minc18407	2	CoaE	coenzyme A biosynthetic process		ATP binding, dephospho-CoA kinase activity	nucleotide binding				A + B	CLOSTRIDIUM METHYLPENTOSUM, SEBALDELLA TERMITIDIS, LEPTOTRICHIA BUCCALIS, LEPTOTRICHIA HOFSTADII, CATENIBACTERIUM MITSUOKAI	BACTERIA: FIRMICUTES, FUSOBACTERIA	BACTERIA	5.29832
Minc07826b	4	Radical_SAM			catalytic activity, iron-sulfur cluster binding	catalytic activity				A	PICHIA PASTORIS, OSTREOCOCCUS LUCIMARINUS, OSTREOCOCCUS TAURI	VIRIDIPLANTAE: CHLOROPHYTA | FUNGI: DIKARYA	PLANT | FUNGI	5.29832
Minc12283	8	Pkinase	protein amino acid phosphorylation	protein modification process	ATP binding, protein kinase activity	protein kinase activity | nucleotide binding				No	N /A	N /A	N /A	5.29832
Minc18566	1									A + B	ORYZA SATIVA INDICA GROUP, SORGHUM BICOLOR, PHYLLOSTACHYS EDULIS	VIRIDIPLANTAE: POACEA	PLANT	5.01064
Minc09221	5	HSP7								A	DEBARYOMYCES HANSENII	FUNGI: DIKARYA	FUNGI	4.85648
Minc14316	3	DUF1768								A	STAPHYLOCOCCUS PHAGE K, RUMINOCOCCUS SP, SHUTTLEWORTHIA SATELLES	BACTERIA: FIRMICUTES | VIRUS: BACTERIPHAGE K	BACTERIA	4.82831
Minc01615	1									A + B	PROCHLOROCOCCUS MARINUS, DICKEYA DADANTII, PLASMODIUM BERGHEI	BACTERIA: CYANOBACTERIA, GAMMAPROTEOBACTERIA | PROTIST: APICOMPLEXA	BACTERIA | PROTIST	4.75932
Minc10330	3	DUF1768								A	STAPHYLOCOCCUS PHAGE K, CLOSTRIDIUM BEIJERINCKII, CLOSTRIDIUM BOTULINUM, CLOSTRIDIUM PERFRINGENS, PROVIDENCIA RETTGERI, NAEGLERIA GRUBERI, MICROMONOSPORA AURANTIACA, BREVIBACILLUS BREVIS, FAECALIBACTERIUM PRAUSNITZII, BACTEROIDES CAPILLOSUS	PROTIST: HETEROLOBOSEA | BACTERIA: FIRMICUTES, GAMMAPROTEOBACTERIA, ACTINOBACTERIA | VIRUS: PHAGE	BACTERIA | PROTIST	4.60517
Minc16606	2									A	PHYTOPHTHORA INFESTANS	PROTIST: OOMYCETE	PROTIST	4.60517
Minc13284	8	Pkinase	protein amino acid phosphorylation	protein modification process	ATP binding, protein kinase activity	protein kinase activity | nucleotide binding				A + B	RHODOPIRELLULA BALTICA	BACTERIA: PLANCTOMYCETES	BACTERIA	4.31749
Minc05055	4									No	N /A	N /A	N /A	3.91202
Minc04115	5									A	NEUROSPORA CRASSA, TALAROMYCES STIPITATUS, PENICILLIUM MARNEFFEI, ASPERGILLUS TERREUS, ASPERGILLUS ORYZAE, ASPERGILLUS FLAVUS, NEOSARTORYA FISCHERI, ASPERGILLUS CLAVATUS, ASPERGILLUS NIDULANS, UNCINOCARPUS REESII, COCCIDIOIDES IMMITIS, COCCIDIOIDES POSADASII, DELTA SOWGP	FUNGI: DIKARYA	FUNGI	3.91202
Minc02456	1	DnaJ			heat shock protein binding					No	N /A	N /A	N /A	3.50656
Minc01316	1									A + B	PLASMODIUM FALCIPARUM	PROTIST: APICOMPLEXA	PROTIST	3.21888
Minc07328	3	Lon_C	proteolysis	protein metabolic process	ATP-dependent peptidase activity, serine-type endopeptidase activity	peptidase activity				A	MEIOTHERMUS RUBER, ANAEROMYXOBACTER SP, SORANGIUM CELLULOSUM, PELOBACTER PROPIONICUS, GEOBACTER BEMIDJIENSIS, GEOBACTER SP, VULARCULA BERMUDENSIS, RUMINOCOCCUS OBEUM, EUBACTERIUM RECTALE, CLOSTRIDIUM HATHEWAYI, CLOSTRIDIALES BACTERIUM, CLOSTRIDIUM BOLTEAE, LEPTOSPIRILLUM SP, LEPTOSPIRILLUM RUBARUM, MYCOPLASMA CONJUNCTIVAE, PAENIBACILLUS SP	BACTERIA: FIRMICUTES, NITROSPIRAE, TENERICUTES, DEINOCOCCI, DELTAPROTEOBACTERIA	BACTERIA	3.10109
Minc09375	6	UQ_con	post-translational protein modification, regulation of protein metabolic process	protein modification process / protein metabolic process	small conjugating protein ligase activity	catalytic activity				No	N /A	N /A	N /A	2.8622
Minc09530	1	TBP	regulation of transcription, DNA-dependent, transcription initiation from RNA polymerase II promoter		DNA binding, RNA polymerase II transcription factor activity					No	N /A	N /A	N /A	2.81341
Minc11909	2	OTCace	cellular amino acid metabolic process		amino acid binding, carboxyl- or carbamoyltransferase activity					A + B	BABESIA BOVIS, THEILERIA ANNULATA, THEILERIA PARVA	PROTIST: APICOMPLEXA	PROTIST	2.70805
Minc14569	1	Retrotrans_gag						Retrotransposon gag protein		No	N /A	N /A	N /A	2.65926
Minc03310	9	Skp1_POZ, Skp1	ubiquitin-dependent protein catabolic process	protein metabolic process						A	POPULUS TRICHOCARPA	VIRIDIPLANTAE: STREPTOPHYTA	PLANT	2.48491
Minc08144	6	UCH	ubiquitin-dependent protein catabolic process	protein metabolic process	ubiquitin thiolesterase activity	hydrolase activity				A	PHYTOPHTHORA INFESTANS, YARROWIA LIPOLYTICA	PROTIST: OOMYCETE | FUNGI: DIKARYA	PROTIST | FUNGI	2.48491
Minc00135	5	Lon_C	proteolysis	protein metabolic process	ATP-dependent peptidase activity, serine-type endopeptidase activity	peptidase activity				No	N /A	N /A	N /A	2.42037
Minc03798	4	E1-E2_ATPase	ATP biosynthetic process		ATP binding; hydrolase activity, acting on acid anhydrides, catalyzing transmembrane movement of substances	nucleotide binding | hydrolase activity	membrane			No	N /A	N /A	N /A	2.30259
Minc07773	5									No	N /A	N /A	N /A	2.07944
Minc14495	3	zf-C3HC4								A	TRYPANOSOMA BRUCEI	PROTIST: TRYPANOSOMATIDAE	PROTIST	1.83258
Minc01503	2	DUF1768								No	N /A	N /A	N /A	1.83258
Minc02089b	2									No	N /A	N /A	N /A	1.60944
Minc07762	4	dUTPase	dUTP metabolic process		hydrolase activity	hydrolase activity				No	N /A	N /A	N /A	1.60944
Minc11600	1									No	N /A	N /A	N /A	1.60944
Minc02473	3	DnaJ			heat shock protein binding					A	DICTYOSTELIUM DISCOIDEUM, TETRAHYMENA THERMOPHILA	PROTIST: AMOEBOZOA, CILIOPHORA	PROTIST	1.38629
Minc09796	2	ubiquitin								No	N /A	N /A	N /A	1.20397
Minc06202	11	Pkinase	protein amino acid phosphorylation	protein modification process	ATP binding, protein kinase activity	protein kinase activity | nucleotide binding				No	N /A	N /A	N /A	1.09861
Minc14704	6									No	N /A	N /A	N /A	0.916291
Minc05795	4	Lon_C	proteolysis	protein metabolic process	ATP-dependent peptidase activity, serine-type endopeptidase activity	peptidase activity				No	N /A	N /A	N /A	0.693147
Minc04880	3	zf-CCHC			nucleic acid binding, zinc ion binding					A	TRYPANOSOMA CRUZI, LEISHMANIA INFANTUM, LEISHMANIA MAJOR	PROTIST: TRYPANOSOMATIDAE	PROTIST	0.693147
Minc03096	4	zf-C3HC4								No	N /A	N /A	N /A	0.693147
Minc09010	5	PfkB								A	TOXOPLASMA GONDII	PROTIST: APICOMPLEXA	PROTIST	0.510826
Minc07542	4									No	N /A	N /A	N /A	0.405465
Minc18072	5	Aminotran_1_2	biosynthetic process		pyridoxal phosphate binding, transferase activity, transferring nitrogenous groups					A	ARABIDOPSIS THALIANA, NICOTIANA GLUTINOSA, NICOTIANA ATTENUATA, PYRUS COMMUNIS, MALUS X DOMESTICA, PHYSCOMITRELLA PATENS, ROSA HYBRID CULTIVAR	VIRIDIPLANTAE: EMBRYOPHITA	PLANT	0.356675
Minc14977	2	RF-1	translational termination		translation release factor activity					A + B	BRADYRHIZOBIUM SP	BACTERIA: ALPHAPROTEOBACTERIA	BACTERIA	0.287682
Minc06074	3	UCH	ubiquitin-dependent protein catabolic process	protein metabolic process	ubiquitin thiolesterase activity	hydrolase activity				No	N /A	N /A	N /A	0.223144
Minc05496	9	Metallophos			hydrolase activity	hydrolase activity				No	N /A	N /A	N /A	0
Minc11770	3							PL3 pectate lyase	Pectin	No	N /A	N /A	N /A	0
Minc13768	2	DPBB_1						EXPN, Expansin-like protein	Plant cell wall	No	N /A	N /A	N /A	0
Minc17301	4	zf-C3HC4								No	N /A	N /A	N /A	0
Minc13000	2	ubiquitin								No	N /A	N /A	N /A	-0.182322
Minc08769	3									No	N /A	N /A	N /A	-0.223144
Minc04673	3									No	N /A	N /A	N /A	-0.336472
Minc18711	7	Cellulase	carbohydrate metabolic process	carbohydrate metabolic process	hydrolase activity, hydrolyzing O-glycosyl compounds	hydrolase activity		GH5 cellulase	Cellulose	No	N /A	N /A	N /A	-0.405465
Minc10931b	2	HSP2								No	N /A	N /A	N /A	-0.405465
Minc17045	3									No	N /A	N /A	N /A	-0.405465
Minc15392	3	RRM_1			nucleic acid binding					No	N /A	N /A	N /A	-0.510826
Minc12026	11	PAP_central	transcription		polynucleotide adenylyltransferase activity					No	N /A	N /A	N /A	-0.693147
Minc08579c	7	Macro								No	N /A	N /A	N /A	-0.693147
Minc09970	4	Pkinase	protein amino acid phosphorylation	protein modification process	ATP binding, protein kinase activity	protein kinase activity | nucleotide binding				A	PARAMECIUM TETRAURELIA	PROTIST: CILIOPHORA	PROTIST	-0.693147
Minc01956	6	RRM_1			nucleic acid binding					No	N /A	N /A	N /A	-0.798508
Minc16110	4	SET								No	N /A	N /A	N /A	-0.798508
Minc08151	5	Lon_C	proteolysis	protein metabolic process	ATP-dependent peptidase activity, serine-type endopeptidase activity	peptidase activity				No	N /A	N /A	N /A	-0.916291
Minc16701	2	DUF889								No	N /A	N /A	N /A	-0.916291
Minc10684	1	zf-CCHC			nucleic acid binding, zinc ion binding					No	N /A	N /A	N /A	-1.20397
Minc11564	3	DnaJ			heat shock protein binding					No	N /A	N /A	N /A	-1.20397
Minc06566	3	Pkinase	protein amino acid phosphorylation	protein modification process	ATP binding, protein kinase activity	protein kinase activity | nucleotide binding				No	N /A	N /A	N /A	-1.32176
Minc03345	3									A + B	STREPTOCOCCUS AGALACTIAE	BACTERIA: FIRMICUTES	BACTERIA	-1.38629
Minc18140	5	Epimerase	cellular metabolic process		catalytic activity, coenzyme binding	catalytic activity				A + B	ARABIDOPSIS THALIANA	VIRIDIPLANTAE: STREPTOPHYTA	PLANT	-1.60944
Minc03527	13	Pkinase	protein amino acid phosphorylation	protein modification process	ATP binding, protein kinase activity	protein kinase activity | nucleotide binding				No	N /A	N /A	N /A	-1.60944
Minc00618	2	Peptidase_M41	proteolysis	protein metabolic process	ATP binding, metalloendopeptidase activity	nucleotide binding | peptidase activity				No	N /A	N /A	N /A	-1.79176
Minc04030	1									No	N /A	N /A	N /A	-1.79176
Minc16248	4	UDPGT	metabolic process		transferase activity, transferring hexosyl groups			GT1	Detoxification / Modulation of plant defense ?	No	N /A	N /A	N /A	-1.79176
Minc18358	6	eIF3_subunit								No	N /A	N /A	N /A	-2.59027
Minc13404	6	Pkinase	protein amino acid phosphorylation	protein modification process	ATP binding, protein kinase activity	protein kinase activity | nucleotide binding				A	PARAMECIUM TETRAURELIA	PROTIST: CILIOPHORA	PROTIST	-2.70805
Minc17211	2							GT1	Detoxification / Modulation of plant defense ?	No	N /A	N /A	N /A	-2.70805
Minc14201	2									No	N /A	N /A	N /A	-2.81341
Minc05984	6	RLI, DUF367								No	N /A	N /A	N /A	-3.10109
Minc01667	4	Histone			DNA binding					No	N /A	N /A	N /A	-3.21888
Minc02701	6	UDPGT	metabolic process		transferase activity, transferring hexosyl groups			GT*_GT1	Detoxification / Modulation of plant defense ?	A + B	CLOSTRIDIUM CELLULOVORANS, BACILLUS THURINGIENSIS, BACILLUS CEREUS, BACILLUS THURINGIENSIS, BACILLUS CEREUS, BACILLUS WEIHENSTEPHANENSIS, BACILLUS MYCOIDES, BACILLUS PSEUDOMYCOIDES, BACILLUS CYTOTOXICUS	BACTERIA: FIRMICUTES	BACTERIA	-3.21888
Minc12202	7	Pkinase	protein amino acid phosphorylation	protein modification process	ATP binding, protein kinase activity	protein kinase activity | nucleotide binding				No	N /A	N /A	N /A	-3.21888
Minc04736	6									No	N /A	N /A	N /A	-3.4012
Minc06065	2	PfkB								No	N /A	N /A	N /A	-3.4012
Minc04622	5	BTB			protein binding					No	N /A	N /A	N /A	-3.50656
Minc07130	4	efhand								No	N /A	N /A	N /A	-3.62434
Minc13698	8	Pkinase	protein amino acid phosphorylation	protein modification process	ATP binding, protein kinase activity	protein kinase activity | nucleotide binding				No	N /A	N /A	N /A	-3.68888
Minc00554	2	Ank								No	N /A	N /A	N /A	-4.31749
Minc05963	7	UDPGT	metabolic process		transferase activity, transferring hexosyl groups			GT1	Detoxification / Modulation of plant defense ?	No	N /A	N /A	N /A	-4.35386
Minc10529	1									No	N /A	N /A	N /A	-4.60517
Minc00665	5	G-alpha	G-protein coupled receptor protein signaling pathway		guanyl nucleotide binding, signal transducer activity	nucleotide binding				A	SCLEROTINIA SCLEROTIORUM, SCLEROTINIA SCLEROTIORUM, BOTRYOTINIA FUCKELIANA, BOTRYOTINIA FUCKELIANA, MYCOSPHAERELLA GRAMINICOLA, MICROSPORUM CANIS, UNCINOCARPUS REESII, COCCIDIOIDES IMMITIS, ASPERGILLUS NIDULANS, ASPERGILLUS NIGER, TALAROMYCES STIPITATUS, PENICILLIUM MARNEFFEI, AJELLOMYCES DERMATITIDIS, PARACOCCIDIOIDES BRASILIENSIS, AJELLOMYCES CAPSULATUS, VERTICILLIUM ALBO-ATRUM, MONILIOPHTHORA …	FUNGI: DIKARYA	FUNGI	-4.82831
Minc12474c	3									No	N /A	N /A	N /A	-5.116
Minc04352	3	BPL_LplA_LipB	protein modification process	protein modification process	catalytic activity	catalytic activity				A	SCHIZOSACCHAROMYCES POMBE	FUNGI: DIKARYA	FUNGI	-5.29832
Minc10191	4									A + B	PARAMECIUM TETRAURELIA	PROTIST: CILIOPHORA	PROTIST	-5.29832
Minc19090a	6	Cellulase	carbohydrate metabolic process	carbohydrate metabolic process	hydrolase activity, hydrolyzing O-glycosyl compounds	hydrolase activity		GH5 cellulase	Cellulose	No	N /A	N /A	N /A	-5.29832
Minc07481	2									No	N /A	N /A	N /A	-5.70378
Minc04989	6	zf-CCCH			nucleic acid binding, zinc ion binding					A + B	PHYTOPHTHORA INFESTANS	PROTIST: OOMYCETE	PROTIST	-5.80914
Minc08100	3	ResIII			ATP binding, DNA binding, hydrolase activity	nucleotide binding | hydrolase activity				No	N /A	N /A	N /A	-5.80914
Minc08671	3	RLI, DUF367								A	TRICHOPLAX ADHAERENS	PLACOZOA	PLACOZOA	-6.21461
Minc16278	12									No	N /A	N /A	N /A	-6.21461
Minc10387	5	UDPGT	metabolic process		transferase activity, transferring hexosyl groups			GT1	Detoxification / Modulation of plant defense ?	No	N /A	N /A	N /A	-6.90776
Minc02580	1									A + B	CYANOTHECE SP	BACTERIA: CYANOBACTERIA	BACTERIA	-7.19544
Minc00932a	3	UPF57					integral to membrane			No	N /A	N /A	N /A	-7.6009
Minc07176	3									No	N /A	N /A	N /A	-7.6009
Minc00928	7	UPF57					integral to membrane			A	PODOSPORA ANSERINA	FUNGI: DIKARYA	FUNGI	-7.75505
Minc09417	10									No	N /A	N /A	N /A	-7.82405
Minc16344	7	Viral_helicase1			helicase activity | hydrolase activity					No	N /A	N /A	N /A	-7.82405
Minc01946	9				electron carrier activity, iron-sulfur cluster binding					A + B	ENTAMOEBA HISTOLYTICA	PROTIST: AMOEBOZOA	PROTIST	-8.22951
Minc03844	4									No	N /A	N /A	N /A	-8.29405
Minc04920a	4									No	N /A	N /A	N /A	-8.51719
Minc09061	5	E1-E2_ATPase	ATP biosynthetic process		ATP binding, hydrolase activity, acting on acid anhydrides, catalyzing transmembrane movement of substances	nucleotide binding | hydrolase activity	membrane			No	N /A	N /A	N /A	-8.80488
Minc00968	1	RVP							Retroviral aspartyl protease	A	DICTYOSTELIUM DISCOIDEUM	PROTIST: AMOEBOZOA	PROTIST	-9.07681
Minc00365	2									A	LEISHMANIA MAJOR, CRYPTOSPORIDIUM PARVUM, CRYPTOSPORIDIUM HOMINIS	PROTIST: APICOMPLEXA, KINETOPLASTIDA	PROTIST	-9.21034
Minc09246	6									No	N /A	N /A	N /A	-9.21034
Minc00269	2									No	N /A	N /A	N /A	-9.49802
Minc07085	6	PITH								No	N /A	N /A	N /A	-9.68034
Minc04655	5									No	N /A	N /A	N /A	-9.72117
Minc16043	1	CENP-B_N			DNA binding		chromosome, centromeric region			No	N /A	N /A	N /A	-9.72117
Minc06128	1	DUF2431								No	N /A	N /A	N /A	-10.0576
Minc00929	2	UPF57					integral to membrane			No	N /A	N /A	N /A	-10.8198
Minc11227	3									No	N /A	N /A	N /A	-10.8198
Minc18321	2									No	N /A	N /A	N /A	-10.8198
Minc18447	13	Metallophos			hydrolase activity	hydrolase activity				No	N /A	N /A	N /A	-12.2061
Minc11843	8	PCRF, RF-1	translational termination		translation release factor activity, translation release factor activity, codon specific		cytoplasm			No	N /A	N /A	N /A	-12.6115
Minc16907	9	UDPGT	metabolic process		transferase activity, transferring hexosyl groups			GT*_GT1	Detoxification / Modulation of plant defense ?	A	VITIS VINIFERA	VIRIDIPLANTAE: STREPTOPHYTA	PLANT	-13.1224
Minc11439	4									No	N /A	N /A	N /A	-13.8155
Minc14733	7	SBDS								No	N /A	N /A	N /A	-13.8155
Minc04230	2									No	N /A	N /A	N /A	-14.0387
Minc08448	3									No	N /A	N /A	N /A	-14.3263
Minc14926	1									No	N /A	N /A	N /A	-14.5087
Minc05401	5									A	TRICHOMONAS VAGINALIS	PROTIST: TRICHOMONADIDA	PROTIST	-15.4249
Minc02513	9	DEAD, Helicase_C			ATP binding; ATP-dependent helicase activity, helicase activity, nucleic acid binding	nucleotide binding | hydrolase activity				No	N /A	N /A	N /A	-15.4249
Minc04404	3	PRMT5			methyltransferase activity		cytoplasm			No	N /A	N /A	N /A	-15.7126
Minc11235	6	DUF889								A + B	ORYZA SATIVA JAPONICA	VIRIDIPLANTAE: STREPTOPHYTA	PLANT	-16.3412
Minc09058	8									No	N /A	N /A	N /A	-16.8112
Minc10120	3	DnaJ			heat shock protein binding					No	N /A	N /A	N /A	-16.8112
Minc07649	23	DUF889, OTU								No	N /A	N /A	N /A	-17.3221
Minc15211	3									No	N /A	N /A	N /A	-17.3221
Minc17711	4	Pribosyltran	nucleoside metabolic process							No	N /A	N /A	N /A	-17.3221
Minc13614	6	Cellulase	carbohydrate metabolic process	carbohydrate metabolic process	hydrolase activity, hydrolyzing O-glycosyl compounds	hydrolase activity		GH5 cellulase	Cellulose	A	UNCULTURED SYMBIOTIC PROTIST OF CRYPTOCERCUS PUNCTULATUS	PROTIST: UNCULTURED	PROTIST	-17.5044
Minc19165	3	Peptidase_S1	proteolysis	protein metabolic process	serine-type carboxypeptidase activity	peptidase activity				No	N /A	N /A	N /A	-18.064
Minc10308b	3	Proteasome	proteolysis involved in cellular protein catabolic process	protein metabolic process	threonine-type endopeptidase activity	peptidase activity	proteasome core complex			No	N /A	N /A	N /A	-19.337
Minc14987	3	AAA_5			ATP binding, ATPase activity	nucleotide binding | hydrolase activity				No	N /A	N /A	N /A	-19.337
Minc09313	3	Peptidase_S1	proteolysis	protein metabolic process	serine-type carboxypeptidase activity	peptidase activity				No	N /A	N /A	N /A	-20.0301
Minc15238	5	RPAP2_Rtr1								No	N /A	N /A	N /A	-20.3178
Minc07726	2									A + B	OPITUTACEAE BACTERIUM	BACTERIA: VERRUCOMICROBIA	BACTERIA	-20.5691
Minc09262	3									No	N /A	N /A	N /A	-20.6179
Minc10900	6									No	N /A	N /A	N /A	-20.7233
Minc01353	3									No	N /A	N /A	N /A	-21.4164
Minc15197	6	WD40								A + B	PHYSCOMITRELLA PATENS, PICEA SITCHENSIS, DICTYOSTELIUM DISCOIDEUM, THEILERIA ANNULATA, THEILERIA PARVA, USTILAGO MAYDIS	PROTIST: AMOEBOZOA, APICOMPLEXA | FUNGI: BASIDIOMYCOTA | VIRIDIPLANTAE: EMBRYOPHITA	PROTIST | FUNGI | PLANT	-21.6396
Minc12378	4									No	N /A	N /A	N /A	-21.6396
Minc16994	2									No	N /A	N /A	N /A	-21.6396
Minc13696	8									No	N /A	N /A	N /A	-23.0259
Minc06039	7	adh_short	metabolic process		oxidoreductase activity	catalytic activity				No	N /A	N /A	N /A	-23.3135
Minc11693	2									No	N /A	N /A	N /A	-23.5367
Minc11202	2									No	N /A	N /A	N /A	-24.2298
Minc16639	2									No	N /A	N /A	N /A	-24.2298
Minc01130	6									No	N /A	N /A	N /A	-24.6353
Minc16621	10	TAFII28	transcription initiation from RNA polymerase II promoter		RNA polymerase II transcription factor activity		nucleus			No	N /A	N /A	N /A	-28.835
Minc07982a	3									A + B	TOXOPLASMA GONDII	PROTIST: APICOMPLEXA	PROTIST	-29.2405
Minc04710	5	AICARFT_IMPCHas	IMP biosynthetic process		catalytic activity	catalytic activity				No	N /A	N /A	N /A	-29.8001
Minc15221	12									A + B	BACILLUS CEREUS, BACILLUS THURINGIENSIS, BACILLUS CEREUS, ALKALIPHILUS METALLIREDIGENS, BACILLUS LICHENIFORMIS, CLOSTRIDIUM BEIJERINCKII, BACILLUS CLAUSII, BACILLUS CEREUS, BACILLUS THURINGIENSIS	BACTERIA: FIRMICUTES	BACTERIA	-33.7403
Minc04950	4	Profilin	cytoskeleton organization		actin binding		actin cytoskeleton			No	N /A	N /A	N /A	-37.2468
Minc02905	3	PMI_typeI	carbohydrate metabolic process	carbohydrate metabolic process	mannose-6-phosphate isomerase activity, zinc ion binding	catalytic activity				A + B	CHLAMYDOMONAS REINHARDTII	VIRIDIPLANTAE: CHLOROPHYTA	PLANT	-37.94
Minc05641	5	DUF83								No	N /A	N /A	N /A	-44.1546
Minc10747	10	WD40								No	N /A	N /A	N /A	-53.8757
Minc03065	6	CAF1					nucleus			No	N /A	N /A	N /A	-54.1634
Minc03483c	5									No	N /A	N /A	N /A	-60.2727
Minc08808	10	WD4, Utp13	rRNA processing				small-subunit processome			No	N /A	N /A	N /A	-74.8867
Minc07926	1									No	N /A	N /A	N /A	-75.5798
Minc12900b	7	LRR_1			protein binding					No	N /A	N /A	N /A	-94.406
Minc04301	4	PGAM								No	N /A	N /A	N /A	-123.423
Minc01669	17	DUF1279, TPR_1, cwf18, RLI, Fer4								No	N /A	N /A	N /A	-125.544
